# Supplementary material for: Syntheses of defined sulfated oligohyaluronans reveal structural effects, diversity and thermodynamics of GAG–protein binding
Source: PubMed Central journal article supplement — Chem Sci. 2018 Nov 1;10(3):866–78. doi: 10.1039/c8sc03649g (PMC6346292; doi:10.1039/c8sc03649g), 2018-11-01
Supplement: SC-010-C8SC03649G-s001.pdf [file SC-010-C8SC03649G-s001.pdf]

## Syntheses of defined sulfated oligohyaluronans reveal structural effects, diversity and thermodynamics of GAG-protein binding

Sebastian Köhling,<sup>†a</sup> Joanna Blaszkiwicz,<sup>†a</sup> Gloria Ruiz-Gómez,<sup>b</sup> María Isabel Fernández-Bachiller,<sup>a</sup> Katharina Lemmnitzer,<sup>c</sup> Nydia Panitz,<sup>d</sup> Annette G. Beck-Sickinger,<sup>d</sup> Jürgen Schiller,<sup>c</sup> M. Teresa Pisabarro,<sup>b\*</sup> Jörg Rademann<sup>a\*</sup>

<sup>a</sup>Institute of Pharmacy – Medicinal Chemistry, Freie Universität Berlin, Königin-Luise-Str. 2+4, 14195 Berlin, Germany.

<sup>b</sup>Structural Bioinformatics, BIOTEC TU Dresden, Tatzberg 47-51, Dresden 01307, Germany

<sup>c</sup>Institute of Medical Physics and Biophysics, University of Leipzig, Härtelstr. 16/18, 04107 Leipzig, Germany

<sup>d</sup>Institute of Biochemistry, University of Leipzig, Brüderstr. 34, 04103 Leipzig, Germany

Corresponding authors' e-mail: joerg.rademann@fu-berlin.de and maria\_teresa.pisabarro@tu-dresden.de

# Supporting Information

|                                                                                                                  |      |
|------------------------------------------------------------------------------------------------------------------|------|
| SScheme 1.....                                                                                                   | S2   |
| 1. General Information.....                                                                                      | S3   |
| 2. Synthetic Protocols.....                                                                                      | S4   |
| 3. NMR and MS-Spectra.....                                                                                       | S18  |
| 4. Calculation of the overall binding affinity of a ligand binding to a protein with n different binding modes.. | S73  |
| 5. Fluorescence Polarization Assays.....                                                                         | S73  |
| 6. Fluorescence Polarization Assay Curves.....                                                                   | S76  |
| 7. Isothermal Titration Calorimetry.....                                                                         | S98  |
| 8. Molecular Modeling.....                                                                                       | S102 |
| 9. References.....                                                                                               | S122 |

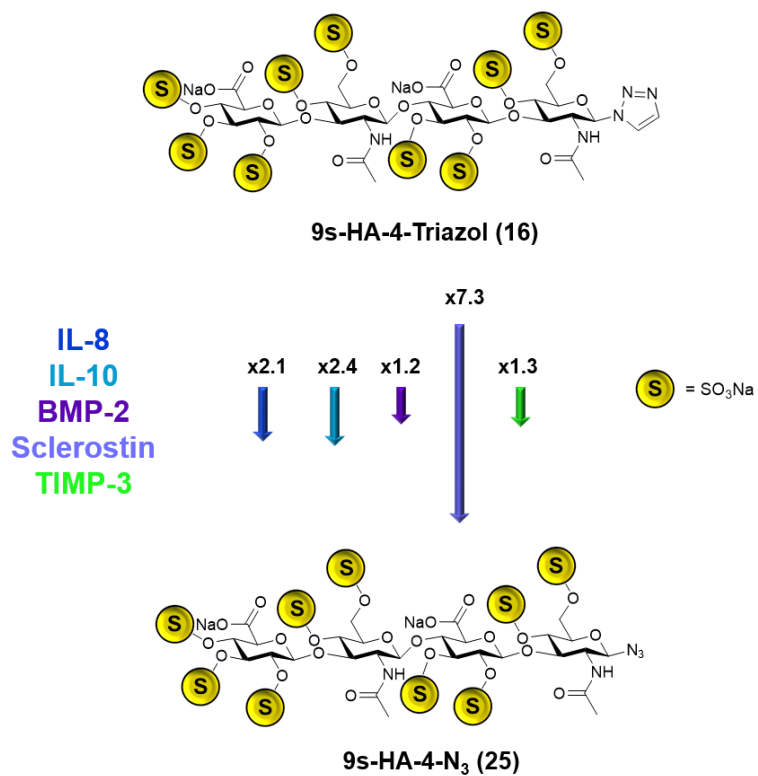

**Scheme 1.** Ratio of determined dissociation constants for triazol- and azide-functionalized tetrahyaluronans toward five regulatory proteins. Ratio of determined  $K_D$  values are symbolized by arrows with protein-specific color code. The arrow direction indicates increasing strength on binding. The length of the arrows corresponds to the observed binding ratio. The fold increase in binding is also numerically shown.

## 1. General Information

HRMS analyses were performed with Agilent 6210 (ESI-TOF, 10  $\mu\text{L}/\text{min}$ , 1.0 bar, 4 kV). NMR experiments were conducted on JEOL ECP 500, 500 MHz and Bruker AVANCE 700, 700 MHz instrument, using  $\text{MeOH-}d_4$  (D, 99.8%),  $\text{DMSO-}d_6$  (D, 99.9%),  $\text{D}_2\text{O}$  (D, 99.9%) as solvents. Chemical shifts are relative to the deuterated solvent peaks and are in parts per million. The following abbreviations were used alone or in combinations: s = singlet, d = doublet, t = triplet, q = quartet. All reagents are commercial grade (purchased from Sigma-Aldrich, Merck and Alfa Aesar) and were used as received. All reactions were performed, if necessary, under inert gas atmosphere using anhydrous solvents. Anhydrous solvents were obtained from the solvent system MB SPS-800 from M. Braun. In case of reactions with anomeric glycosyl thiols, the solvents were degassed with inert gas bubbling and ultrasonic. Thin-layer chromatography (TLC) and flash chromatography separations were respectively performed on coated aluminium sheets from Merck (silica gel 60, GF254 and silica gel 60 W, F254s in case of  $\Delta\text{HA-8}$ , **35**) and on Merck silica gel 60 (230–400 mesh). Visualization of the plates was achieved using a UV lamp ( $\lambda_{\text{max}} = 254 \text{ nm}$ ), and/or vanillin staining solution (0.56 g vanillin, 10 mL glacial acetic acid and 6 mL conc.  $\text{H}_2\text{SO}_4$  in 100 mL MeOH). Proteins were purchased from Sigma Aldrich (TGF- $\beta$ 1: T7039, BMP-2: B3555, FGF-1: SRP3041, FGF-2: SRP4037, TIMP-3: T1327, AT-3: SRP6316) and R+D-Systems (Sclerostin: 1406-ST-025/CF) or in case of IL-8<sup>1</sup>, IL-10<sup>2</sup> and SDF-1<sup>3</sup> expressed according to the stated protocol.

MS-Analysis of sulfated oligosaccharides was carried out by electro-spray ionization mass spectrometry (ESI-MS) with an Amazon SL ion trap mass spectrometer (BrukerDaltonics, Bremen, Germany). Nitrogen was used as the nebulizer gas. The samples were introduced into the ESI source by using a syringe pump at a flow rate of 2 - 5  $\text{mL min}^{-1}$ . Data acquisition and analysis were carried out by using the programs Trap Control and DataAnalysis, respectively (BrukerDaltonics, Bremen, Germany). The sodium salt of the analyte was dissolved in deionized water (Millipore) to a concentration of 5  $\text{mg mL}^{-1}$  and diluted 1:5 with MeOH (50%) for a final concentration of 0,5  $\text{mg mL}^{-1}$ . The unusual high analyte concentration in combination with an optimization for every single analyte made an anion exchange step redundant and enabled the acquisition of mass spectra in positive ion mode for all analytes shown in this work. The spectral quality for the positive ion mass spectra strongly depends on the salt concentration and on the analyte itself. In the case of azide complexes a mass loss of  $\Delta m/z = 43.02$  was found. This corresponds to a loss of  $\text{HN}_3$  as in source fragmentation during the electrospray ionisation process as described in the literature before.<sup>4</sup>

## 2. Synthetic Protocols

### Hyaluronan disaccharide azide, (HA-2-N<sub>3</sub>, β-D-glucopyranuronyl-(1→3)-β-D-2-acetamido-2-deoxy-glucopyranosyl-azide (4)

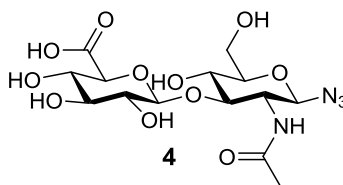

HA-2<sup>5</sup> **1** (96 mg, 0.24 mmol), *N*-methylmorpholine (398 μl, 3.62 mmol) and sodium azide (471 mg, 7.24 mmol) were dissolved in water (4 mL). The solution was cooled to 0 °C and 2-chloro-1,3-dimethylimidazolium chloride (184 mg, 1.08 mmol) was added in one portion. The ice bath was removed after 5 min and the reaction mixture stirred for 24 h at room temperature. For purification, silica gel (3g) was added and the suspension was evaporated and dried under reduced pressure and in high vacuum. The product was first purified by flash chromatography using EtOAc/MeOH/H<sub>2</sub>O 5:2.5:2 followed by HPLC (C-18, isocratic 95:5 H<sub>2</sub>O (+0.1%TFA) / MeCN (+0.1%TFA), flow rate; 40 ml/min, detection UV (214 nm)). The product-containing fractions were combined and freeze dried to yield HA-2-N<sub>3</sub> **4** as a colorless powder (60 mg, 59%). <sup>1</sup>H-NMR (500 MHz, D<sub>2</sub>O) δ = 4.79 (d, *J* = 7.2 Hz, 1H), 4.54 (d, *J* = 7.9 Hz, 1H), 4.01 (d, *J* = 9.7 Hz, 1H), 3.92 (dd, *J* = 12.5, 2.1 Hz, 1H), 3.85 (dd, *J* = 10.4, 9.2 Hz, 1H), 3.80 – 3.74 (m, 2H), 3.64 – 3.47 (m, 4H), 3.35 (dd, *J* = 9.3, 7.9 Hz, 1H), 2.03 (s, 3H) ppm. <sup>13</sup>C NMR (126 MHz, D<sub>2</sub>O) δ = 174.99, 172.20, 102.87, 88.69, 82.85, 77.66, 75.24, 72.62, 71.29, 68.32, 60.73, 53.98, 22.38 ppm. HRMS (ESI) calcd for C<sub>14</sub>H<sub>21</sub>N<sub>4</sub>O<sub>11</sub> [M-H<sup>+</sup>]: 421.1212 Da; found: 421.132 m/z.

### Hyaluronan hexasaccharide azide, (HA-6-N<sub>3</sub>, β-D-glucopyranuronyl-(1→3)-β-D-2-acetamido-2-deoxy-glucopyranosyl-(1→4)-β-D-glucopyranuronyl-(1→3)-β-D-2-acetamido-2-deoxy-glucopyranosyl-(1→4)-β-D-glucopyranuronyl-(1→3)-β-D-2-acetamido-2-deoxy-glucopyranosyl-azide (6)

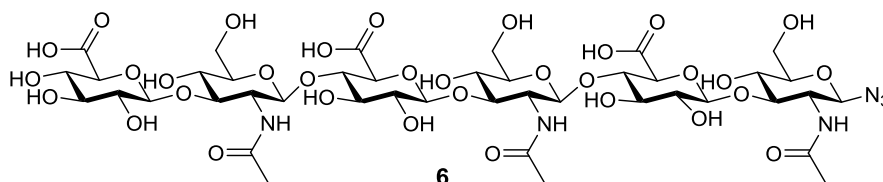

HA-6<sup>5</sup> **3** (133 mg, 0.11 mmol), *N*-methylmorpholine (359 μl, 3.26 mmol) and sodium azide (425 mg, 6.53 mmol) were dissolved in water (5 mL). The solution was cooled to 0 °C and 2-chloro-1,3-dimethylimidazolium chloride (184 mg, 1.08 mmol) was added in one portion. The ice bath was removed after 5 min and the reaction mixture stirred for 30 h at room temperature. Subsequently, the solvent was evaporated and the crude product desalted on a Sephadex G-10 column (3x20 cm, deionized water) and purified by HPLC (C-18, isocratic 95:5 H<sub>2</sub>O (+0.1%TFA) / MeCN (+0.1%TFA), flow rate; 40 ml/min, detection UV (214 nm)). The product-containing fractions were combined and freeze dried to yield HA-6-azide **6** as a colorless solid (65 mg, 48%). <sup>1</sup>H NMR (700 MHz, D<sub>2</sub>O) δ = 4.69 (d, *J* = 9.4 Hz, 1H), 4.51 – 4.46 (m, 4H), 4.45 (d, *J* = 7.9 Hz, 1H), 3.95 – 3.92 (m, 3H), 3.85 – 3.81 (m, 3H), 3.79 – 3.75 (m, 3H), 3.75 – 3.71 (m, 2H), 3.71 – 3.63 (m, 6H), 3.59 – 3.55 (m, 2H), 3.53 – 3.42 (m, 2H), 3.43 – 3.38 (m, 2H), 3.31 – 3.24 (m, 3H), 1.94 (d, *J* = 0.9 Hz, 3H), 1.91 (s, 3H), 1.91 (s, 3H) ppm. <sup>13</sup>C NMR (176 MHz, D<sub>2</sub>O) δ = 174.77, 174.69, 174.68, 171.95, 170.96, 102.89, 102.82, 102.59, 101.15, 101.15, 88.48, 82.62, 82.34, 80.08, 77.46, 75.31, 75.01, 74.23, 73.64, 73.64, 73.32, 73.31, 72.40, 72.04, 71.08, 68.22,

68.15, 68.04, 60.50, 60.47, 60.47, 54.29, 54.17, 53.89, 22.35, 22.17 ppm. **HRMS** (ESI) calcd for C<sub>42</sub>H<sub>63</sub>N<sub>6</sub>O<sub>33</sub> [M-H<sup>+</sup>]<sup>-</sup>: 1179.344 Da; found: 1179.355 m/z.

### 5(6)-carboxytetramethyl rhodamine-2-propynylamide (7)

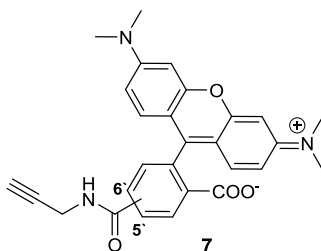

5(6)-Carboxytetramethylrhodamine (131 mg, 0.304 mmol), DIPEA (159  $\mu$ L, 0.912 mmol) and Propargylamine (23  $\mu$ L, 4.47 mmol) was dissolved in dry DMF (2 mL) followed by the addition of *O*-(7-Azabenzotriazol-1-yl)-*N,N,N',N'*-tetramethyluronium-hexafluorophosphat, HATU (116 mg, 0.304 mmol). The reaction mixture was stirred at room temperature for 30 min. The solvent was evaporated under reduced pressure and the crude product was purified by HPLC (C-18, 90:10 H<sub>2</sub>O (+0,1%TFA) / MeCN (+0,1%TFA) to 65:35 in 15 min), flow rate; 40 ml/min, detection UV(214 nm)). The product containing fractions of both regioisomers were freeze dried to yield **7 (A+B)** as dark violett powder (158 mg, 85%). <sup>1</sup>H NMR (500 MHz, Methanol-*d*<sub>4</sub>)  $\delta$  = 8.78 (d, *J* = 1.8 Hz, 1H), 8.39 (d, *J* = 8.3 Hz, 1H), 8.26 (dd, *J* = 7.9, 1.7 Hz, 1H), 8.20 (dd, *J* = 8.2, 1.8 Hz, 1H), 7.84 (d, *J* = 1.8 Hz, 1H), 7.52 (d, *J* = 7.9 Hz, 1H), 7.12 (dd, *J* = 9.5, 1.7 Hz, 4H), 7.02 (ddd, *J* = 9.4, 6.8, 2.5 Hz, 4H), 6.91 (dd, *J* = 4.4, 2.4 Hz, 4H), 4.24 (d, *J* = 2.6 Hz, 2H), 4.15 (d, *J* = 2.5 Hz, 2H), 3.27 (s, 12H), 3.27 (s, 12H), 2.68 (t, *J* = 2.5 Hz, 1H), 2.62 (t, *J* = 2.5 Hz, 1H) ppm. <sup>13</sup>C NMR (126 MHz, Methanol-*d*<sub>4</sub>)  $\delta$  = 166.40, 166.10, 159.20, 159.08, 157.68, 157.59, 137.47, 137.06, 136.71, 135.84, 134.28, 131.62, 131.06, 130.73, 130.63, 130.20, 129.21, 128.73, 114.24, 113.52, 113.38, 96.16, 79.22, 79.05, 71.08, 39.64, 28.84 ppm. **HRMS** (ESI) calcd for C<sub>28</sub>H<sub>25</sub>N<sub>3</sub>O<sub>4</sub> [M-H<sup>+</sup>]<sup>-</sup>: 466.177; found: 466.176 m/z.

### Hyaluronan tetrasaccharide-5(6)TAMRA, HA-6-5(6)TAMRA, $\beta$ -D-glucopyranuronyl-(1 $\rightarrow$ 3)- $\beta$ -D-2-acetamido-2-deoxy-glucopyranosyl-(1 $\rightarrow$ 4)- $\beta$ -D-glucopyranuronyl-(1 $\rightarrow$ 3)- $\beta$ -D-2-acetamido-2-deoxy-glucopyranosyl-1,2,3-triazol-4-yl-methyl-2-carbamoyl-5(6)-carboxytetramethylrhodamine (8)

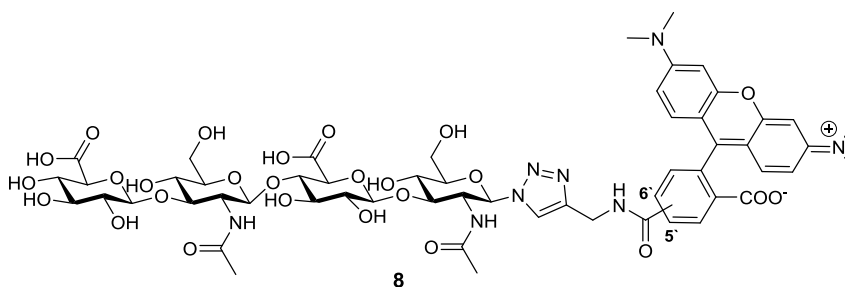

The tetrahyaluronan azide **5** <sup>6</sup> (82 mg, 0.102 mmol), 5(6)-TAMRA-Propargylamide **7** (75 mg, 0.123 mmol) and Tris[(1-benzyl-1*H*-1,2,3-triazol-4-yl)methyl]amine TBTA (3.4 mg, 6.1  $\mu$ mol) was dissolved in degassed MeOH (5 mL). An degassed aqueous solution (2 mL) of copper sulfate pentahydrate (2.55 mg, 10.2  $\mu$ mol) was added followed by sodium ascorbate (8 mg, 41  $\mu$ mol). The reaction mixture was stirred at room temperature under argon for 2h. The solvent was evaporated under reduced pressure and the crude product was purified by HPLC (C-18, isocratic 95:5 H<sub>2</sub>O (+0,1%TFA) / MeCN (+0,1%TFA) for 5 min to 70:30 in 20 min), flow rate; 40

ml/min, detection UV(214 nm)). The product containing fractions of both regioisomers were separately freeze dried to yield **8 (A+B)** as dark violett powder (121 mg, 93%, 49 mg of **A**). **<sup>1</sup>H NMR** (700 MHz, DMSO-*d*<sub>6</sub>/D<sub>2</sub>O 6:1), 5'-Isomer of **8 (A)**: δ = 8.59 (d, *J* = 1.8 Hz, 1H), 8.22 – 8.18 (m, 1H), 8.11 (s, 1H), 7.49 (d, *J* = 7.9 Hz, 1H), 6.95 (d, *J* = 9.3 Hz, 2H), 6.90 – 6.84 (m, 2H), 6.66 (d, *J* = 2.1 Hz, 2H), 5.76 (d, *J* = 9.6 Hz, 1H), 4.59 (t, *J* = 10.1 Hz, 2H), 4.32 (d, *J* = 7.8 Hz, 1H), 4.27 (t, *J* = 9.8 Hz, 1H), 3.86 (d, *J* = 9.5 Hz, 1H), 3.82 (d, *J* = 9.5 Hz, 1H), 3.77 (d, *J* = 9.7 Hz, 1H), 3.74 – 3.66 (m, 2H), 3.64 – 3.52 (m, 5H), 3.52 – 3.44 (m, 1H), 3.42 (t, *J* = 8.8 Hz, 1H), 3.33 (t, *J* = 9.4 Hz, 1H), 3.30 – 3.25 (m, 2H), 3.22 (t, *J* = 8.9 Hz, 1H), 3.15 (t, *J* = 8.3 Hz, 1H), 3.13 – 3.03 (m, 13H), 1.80 (s, 3H), 1.62 (s, 3H) ppm. **<sup>13</sup>C NMR** (176 MHz, DMSO), 5'-Isomer of **8 (A)**: δ = 172.85, 172.39, 170.88, 169.76, 166.42, 166.34, 160.29, 160.10, 157.81, 157.01, 145.02, 136.63, 135.50, 131.65, 131.26, 131.04, 130.65, 130.11, 122.59, 114.63, 112.88, 103.29, 103.21, 101.28, 96.42, 86.08, 83.08, 82.81, 80.71, 78.94, 75.94, 75.41, 74.72, 73.97, 73.48, 72.74, 72.23, 71.36, 68.81, 68.20, 60.80, 60.44, 54.12, 53.58, 40.53, 34.99, 22.89, 22.44 ppm. **HRMS** (ESI) calcd for C<sub>56</sub>H<sub>68</sub>N<sub>8</sub>O<sub>26</sub> [M-H<sup>+</sup>]<sup>-</sup>: 1267.417; found: 1267.422 m/z.

**<sup>1</sup>H NMR** (700 MHz, DMSO-*d*<sub>6</sub>/D<sub>2</sub>O 6:1), 6'-Isomer of **8 (B)**: δ = 8.26 (d, *J* = 8.3 Hz, 1H), 8.13 (dd, *J* = 8.1, 1.7 Hz, 1H), 8.04 (s, 1H), 7.72 (d, *J* = 1.7 Hz, 1H), 6.96 (d, *J* = 9.4 Hz, 2H), 6.90 (dd, *J* = 9.5, 2.3 Hz, 2H), 6.79 (d, *J* = 2.2 Hz, 2H), 5.72 (d, *J* = 9.7 Hz, 1H), 4.53 – 4.45 (m, 2H), 4.43 (d, *J* = 7.8 Hz, 1H), 4.40 (d, *J* = 8.0 Hz, 1H), 4.28 – 4.26 (m, 1H), 4.22 (t, *J* = 10.0 Hz, 1H), 3.84 (d, *J* = 9.5 Hz, 1H), 3.79 (t, *J* = 9.4 Hz, 1H), 3.75 (d, *J* = 9.7 Hz, 1H), 3.71 (d, *J* = 10.9 Hz, 1H), 3.66 (d, *J* = 10.6 Hz, 1H), 3.62 – 3.50 (m, 5H), 3.44 (dt, *J* = 12.2, 7.4 Hz, 2H), 3.40 (t, *J* = 8.8 Hz, 1H), 3.32 (t, *J* = 9.4 Hz, 1H), 3.29 – 3.19 (m, 3H), 3.17 – 3.09 (m, 14H), 3.06 (t, *J* = 8.5 Hz, 1H), 1.79 (s, 3H), 1.55 (s, 3H) ppm. **<sup>13</sup>C NMR** (176 MHz, DMSO), 6'-Isomer of **8 (B)**: δ = 172.45, 171.97, 170.74, 169.60, 166.30, 165.81, 159.78, 159.59, 157.90, 157.08, 144.87, 137.26, 133.77, 133.41, 131.78, 130.83, 129.29, 129.15, 122.44, 114.71, 113.05, 103.31, 101.31, 96.46, 86.04, 83.11, 82.85, 80.85, 79.04, 76.09, 75.52, 74.89, 74.07, 73.55, 72.82, 72.29, 71.43, 68.91, 68.23, 60.88, 60.44, 54.15, 53.47, 40.65, 34.98, 22.98, 22.50 ppm. **HRMS** (ESI) calcd for C<sub>56</sub>H<sub>68</sub>N<sub>8</sub>O<sub>26</sub> [M-H<sup>+</sup>]<sup>-</sup>: 1267.417; found: 1267.421 m/z.

**Hyaluronan hexasaccharide 5(6)TAMRA, HA-6-5(6)TAMRA, β-D-glucopyranuronyl-(1→3)-β-D-2-acetamido-2-deoxy-glucopyranosyl-(1→4)-β-D-glucopyranuronyl-(1→3)-β-D-2-acetamido-2-deoxy-glucopyranosyl-(1→4)-β-D-glucopyranuronyl-(1→3)-β-D-2-acetamido-2-deoxy-glucopyranosyl-1,2,3-triazol-4-yl-methyl-2-carbamoyl-5(6)-carboxytetramethylrhodamine (9)**

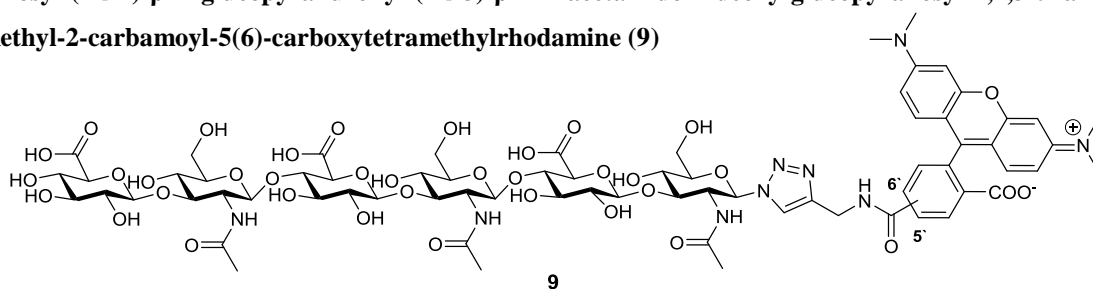

The hexahyaluronan azide **6** (88 mg, 0.074 mmol), 5(6)-TAMRA-Propargylamide **7** (52 mg, 0.085 mmol) and TBTA (2.4 mg, 4.47 μmol) was dissolved in degassed MeOH (4 mL). A degassed aqueous solution (1 mL) of copper sulfate pentahydrate (1.9 mg, 7.4 μmol) was added followed by sodium ascorbate (9 mg, 44 μmol). The reaction mixture was stirred at room temperature under argon for 4h. Solvent was evaporated under reduced pressure and the crude product was purified by HPLC (C-18, isocratic 95:5 H<sub>2</sub>O (+0,1%TFA) / MeCN (+0,1%TFA) for 5 min to 40:60 in 20 min), flow rate; 40 ml/min, detection UV(214 nm)). The product containing fractions of both regioisomers were separately freeze dried to yield **9 (A+B)** as dark violett powder (97 mg, 79%, 37 mg of **A**). **<sup>1</sup>H NMR** (700 MHz, DMSO-*d*<sub>6</sub>) 5'-Isomer of **9 (A)**: δ = 8.62 (d, *J* = 1.8 Hz, 1H),

8.23 (dd,  $J = 7.9, 1.9$  Hz, 1H), 8.09 (s, 1H), 7.51 (d,  $J = 7.9$  Hz, 1H), 7.03 – 6.90 (m, 4H), 6.84 (d,  $J = 2.0$  Hz, 2H), 5.77 (d,  $J = 9.6$  Hz, 1H), 4.61 – 4.53 (m, 2H), 4.45 (d,  $J = 7.7$  Hz, 1H), 4.43 – 4.36 (m, 3H), 4.31 (d,  $J = 7.8$  Hz, 1H), 4.26 (t,  $J = 10.5$  Hz, 2H), 3.87 – 3.79 (m, 3H), 3.73 (d,  $J = 9.7$  Hz, 1H), 3.70 (d,  $J = 10.6$  Hz, 3H), 3.60 – 3.52 (m, 8H), 3.48 – 3.42 (m, 3H), 3.42 – 3.36 (m, 2H), 3.31 (t,  $J = 9.4$  Hz, 1H), 3.28 – 3.18 (m, 5H), 3.16 (s, 12H), 3.12 (t,  $J = 8.4$  Hz, 1H), 3.08 (t,  $J = 8.4$  Hz, 1H), 3.04 (t,  $J = 8.5$  Hz, 1H), 1.78 (s, 6H), 1.62 (s, 6H) ppm;  $^{13}\text{C}$  NMR (176 MHz, DMSO), 5'-Isomer of **9** (B):  $\delta = 172.15, 171.82, 170.65, 169.49, 166.18, 166.01, 159.77, 159.58, 158.10, 157.19, 157.12, 145.02, 136.63, 135.66, 131.68, 131.34, 131.07, 130.77, 130.14, 122.38, 114.87, 112.98, 103.36, 101.34, 96.53, 83.15, 83.01, 82.94, 76.17, 75.59, 74.99, 74.13, 74.08, 73.60, 73.56, 72.87, 72.35, 71.46, 68.94, 68.31, 60.91, 60.50, 54.17, 53.44, 40.71, 35.05, 23.05, 22.63$  ppm; HRMS (ESI) calcd for  $\text{C}_{70}\text{H}_{89}\text{N}_9\text{O}_{37} [\text{M}-\text{H}^+]$ : 1646.528; found: 1646.530 m/z.

$^1\text{H}$  NMR (700 MHz, DMSO- $d_6$ ), 6'-Isomer of **9** (B):  $\delta = 8.24$  (d,  $J = 8.3$  Hz, 1H), 8.11 – 8.08 (m, 1H), 8.04 (s, 1H), 7.68 (s, 1H), 6.95 (d,  $J = 9.4$  Hz, 2H), 6.86 (dd,  $J = 9.5, 2.0$  Hz, 2H), 6.76 (s, 2H), 5.70 (d,  $J = 9.6$  Hz, 1H), 4.54 – 4.40 (m, 5H), 4.31 (d,  $J = 7.6$  Hz, 1H), 4.21 (t,  $J = 9.9$  Hz, 1H), 3.86 – 3.75 (m, 4H), 3.73 – 3.64 (m, 3H), 3.64 – 3.51 (m, 9H), 3.50 – 3.43 (m, 3H), 3.43 – 3.37 (m, 2H), 3.33 (t,  $J = 9.4$  Hz, 1H), 3.30 – 3.20 (m, 5H), 3.17 – 3.05 (m, 16H), 1.79 (s, 3H), 1.79 (s, 3H), 1.54 (s, 3H) ppm.  $^{13}\text{C}$  NMR (176 MHz, DMSO), 6'-Isomer of **9** (A):  $\delta = 172.87, 172.32, 170.88, 169.77, 166.44, 166.08, 160.46, 160.27, 157.72, 157.05, 144.78, 137.15, 133.76, 133.42, 131.79, 130.77, 129.28, 129.04, 122.50, 114.60, 112.98, 103.26, 103.18, 101.27, 96.44, 86.07, 83.05, 82.93, 82.70, 80.66, 78.87, 75.89, 75.40, 74.75, 73.91, 73.46, 72.72, 72.21, 71.35, 68.76, 68.14, 60.77, 60.38, 54.12, 53.57, 40.57, 34.94, 22.88, 22.37$  ppm. HRMS (ESI) calcd for  $\text{C}_{70}\text{H}_{89}\text{N}_9\text{O}_{37} [\text{M}-\text{H}^+]$ : 1646.528; found: 1646.535 m/z.

**Hyaluronan tetrasaccharide Triazol (HA-4-Triazol,  $\beta$ -D-glucopyranuronyl-(1 $\rightarrow$ 3)- $\beta$ -D-2-acetamido-2-deoxy-glucopyranosyl-(1 $\rightarrow$ 4)- $\beta$ -D-glucopyranuronyl-(1 $\rightarrow$ 3)- $\beta$ -D-2-acetamido-2-deoxy-glucopyranosyl-1,2,3-triazol (**10**))**

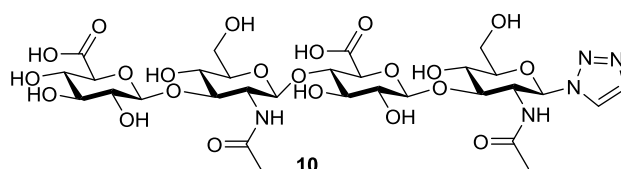

The tetrahyaluronan azide **5**<sup>6</sup> (77 mg, 0.096 mmol), Ethynyltrimethylsilane (27  $\mu\text{l}$ , 0.192 mmol) and Tris[(1-benzyl-1*H*-1,2,3-triazol-4-yl)methyl]amine TBTA (3 mg, 5.7  $\mu\text{mol}$ ) was dissolved in degassed MeOH (3 mL). A degassed aqueous solution (1 mL) of copper sulfate pentahydrate (3.6 mg, 14.4  $\mu\text{mol}$ ) was added followed by sodium ascorbate (7.6 mg, 38  $\mu\text{mol}$ ). The reaction mixture was stirred at room temperature under argon for 2h. The solvent was evaporated under reduced pressure and the crude product dried in high vacuum. After dissolving the residue in THF:H<sub>2</sub>O:AcOH 10:4:1 (6 mL), TBAF (96  $\mu\text{L}$ , 1M TBAF in THF, 0.096 mmol) was added and the reaction mixture stirred for 16 h. The solvent was evaporated under reduced pressure and the crude product purified by HPLC (C-18, isocratic 95:5 H<sub>2</sub>O (+0,1%TFA) / MeCN (+0,1%TFA) for 5 min to 70:30 in 20 min), flow rate; 40 ml/min, detection UV(214 nm)). The product containing fractions were freeze dried to yield **10** as white powder (60 mg, 76%).  $^1\text{H}$  NMR (500 MHz, D<sub>2</sub>O)  $\delta = 8.13$  (s, 1H), 7.75 (s, 1H), 5.84 (d,  $J = 9.7$  Hz, 1H), 4.52 (d,  $J = 7.9$  Hz, 1H), 4.49 (d,  $J = 8.4$  Hz, 1H), 4.45 (d,  $J = 7.9$  Hz, 1H), 4.34 (t,  $J = 10.1$  Hz, 1H), 3.95 (d,  $J = 9.8$  Hz, 1H), 3.94 – 3.89 (m, 2H), 3.86 – 3.80 (m, 2H), 3.79 – 3.62 (m, 8H), 3.57 (dd,  $J = 9.5, 8.7$  Hz, 1H), 3.53 – 3.38 (m, 5H), 3.30 (dd,  $J = 9.5, 7.9$  Hz, 1H), 3.26 (dd,  $J = 9.3, 7.9$  Hz, 1H), 1.91 (s, 3H), 1.69 (s, 3H) ppm.

$^{13}\text{C}$  NMR (126 MHz,  $\text{D}_2\text{O}$ )  $\delta = 175.29, 174.09, 171.98, 170.98, 163.03, 162.74, 134.91, 134.06, 124.84, 124.54, 102.91, 102.79, 102.57, 101.19, 101.11, 86.06, 86.01, 82.66, 82.57, 82.54, 82.20, 81.80, 80.22, 79.94, 78.62, 78.41, 75.38, 75.23, 75.04, 74.94, 74.31, 73.90, 73.62, 73.53, 73.11, 72.49, 72.29, 72.14, 71.94, 71.06, 68.21, 67.97, 67.74, 60.71, 60.53, 60.41, 60.18, 54.31, 54.25, 54.12, 54.02, 22.47, 22.21, 21.80, 21.47$  ppm. **HRMS** (ESI) calcd for  $\text{C}_{30}\text{H}_{45}\text{KN}_5\text{O}_{22}$   $[\text{M}+\text{K}^+]^+$ : 866.218; found: 866.220 m/z.

**3- $\beta$ -D-Glucopyranuronyl-(1 $\rightarrow$ 3)- $\beta$ -D-2-acetamido-2-deoxy-gluco-pyranosyl-(1 $\rightarrow$ 4)- $\beta$ -D-glucopyranuronyl-(1 $\rightarrow$ 3)- $\beta$ -D-2-acetamido-2-deoxy-gluco-pyranosyl-1-thio-methyl (12)**

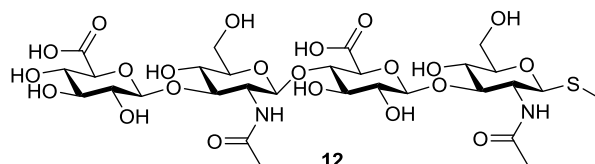

To a solution of  $\beta$ -D-glucopyranuronyl-(1 $\rightarrow$ 3)- $\beta$ -D-2-acetamido-2-deoxy-gluco-pyranosyl-(1 $\rightarrow$ 4)- $\beta$ -D-glucopyranuronyl-(1 $\rightarrow$ 3)- $\beta$ -D-2-acetamido-2-deoxy-gluco-pyranosyl-1-thiobenzoate, HA-4-SBz<sup>5</sup> (72 mg, 0.08 mmol) in dry and degassed MeOH (10mL), Methyl iodide (25  $\mu\text{L}$ , 0.4 mmol) and sodium methoxide (43 mg, 0.8 mmol, 173  $\mu\text{L}$  25% wt. % in MeOH) was added. The solution was stirred for 16 h and evaporated under reduced pressure. The crude product was purified by HPLC (C-18, isocratic 95:5  $\text{H}_2\text{O}$  (+0,1%TFA) / MeCN (+0,1%TFA) for 15 min), flow rate; 40 ml/min, detection UV(210 nm)). The product containing fractions were combined and freeze dried to yield **12** (41 mg, 63%) as white powder.  $^1\text{H}$  NMR (500 MHz,  $\text{D}_2\text{O}$ )  $\delta = 4.58 - 4.55$  (m, 2H), 4.54 - 4.51 (m, 2H), 4.03 - 3.99 (m, 2H), 3.96 - 3.70 (m, 10H), 3.65 (dd,  $J = 9.5, 8.7$  Hz, 1H), 3.60 - 3.49 (m, 5H), 3.49 - 3.45 (m, 1H), 3.39 - 3.31 (m, 2H), 2.18 (s, 3H), 2.00 (s, 3H), 1.99 (s, 3H) ppm.  $^{13}\text{C}$  NMR (126 MHz,  $\text{D}_2\text{O}$ )  $\delta = 174.89, 174.68, 172.19, 171.18, 103.15, 102.76, 101.36, 84.57, 84.06, 82.80, 80.29, 79.69, 75.50, 75.19, 74.33, 73.87, 73.46, 72.59, 72.25, 71.28, 68.56, 68.40, 60.99, 60.66, 54.37, 53.22, 22.53, 22.40, 11.99$  ppm. **HRMS** (ESI) calcd for  $\text{C}_{29}\text{H}_{46}\text{N}_2\text{NaO}_{22}\text{S}$   $[\text{M}+\text{Na}^+]^+$ : 829.215; found: 829.217 m/z.

**3- $\beta$ -D-Glucopyranuronyl-(1 $\rightarrow$ 3)- $\beta$ -D-2-acetamido-2-deoxy-gluco-pyranosyl-(1 $\rightarrow$ 4)- $\beta$ -D-glucopyranuronyl-(1 $\rightarrow$ 3)- $\beta$ -D-2-acetamido-1,5-anhydro-2-deoxy-sorbitol (13)**

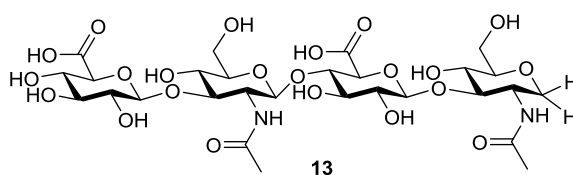

$\beta$ -D-glucopyranuronyl-(1 $\rightarrow$ 3)- $\beta$ -D-2-acetamido-2-deoxy-gluco-pyranosyl-(1 $\rightarrow$ 4)- $\beta$ -D-glucopyranuronyl-(1 $\rightarrow$ 3)- $\beta$ -D-2-acetamido-2-deoxy-gluco-pyranosyl-thiol, HA-4-SH<sup>5</sup> (66 mg, 0.083 mmol) and tris(2-carboxyethyl)phosphine, TCEP (26 mg, 0.091 mmol) were placed in UV-cuvette and dissolved in MeOH/ $\text{H}_2\text{O}$  4:1 (2 mL). The photosensitizer 2-hydroxy-1-[4-(2-hydroxyethoxy)phenyl]-2-methyl-1-propanone, Irgacure 2959 (5 mg, 0.024 mmol) was added and the mixture stirred for 2h under irradiation with UV light from an Exo Terra Repti Glo 5.0 Compact lamp (UVB100, 25W, No. PT2187). The solvents were evaporated under reduced pressure and the crude product pre-cleaned on Sephadex G-10 column (22x3.5 cm, eluent: dest. water, product detected by TLC, EtOAc/MeOH/ $\text{H}_2\text{O}$  4.5:2.5:2, vanilin-staining). The product was finally purified by HPLC (C-



18, isocratic 95:5 H<sub>2</sub>O (+0,1%TFA) / MeCN (+0,1%TFA) for 8 min), flow rate; 40 ml/min, detection UV(210 nm)). The product containing fractions are combined and freeze dried to yield **13** (45 mg, 71%) as white powder. <sup>1</sup>H NMR (700 MHz, D<sub>2</sub>O) δ = 4.53 (dd, *J* = 7.9, 0.7 Hz, 1H), 4.50 (d, *J* = 8.5 Hz, 1H), 4.46 (d, *J* = 7.9 Hz, 1H), 3.97 – 3.91 (m, 3H), 3.85 – 3.75 (m, 4H), 3.74 (ddd, *J* = 9.6, 8.7, 0.8 Hz, 1H), 3.70 – 3.60 (m, 4H), 3.58 (ddd, *J* = 9.5, 8.7, 0.8 Hz, 1H), 3.53 – 3.48 (m, 2H), 3.46 – 3.40 (m, 3H), 3.32 – 3.25 (m, 3H), 3.19 (t, *J* = 11.3 Hz, 1H), 1.91 (s, 3H), 1.89 (s, 3H). ppm. <sup>13</sup>C NMR (176 MHz, D<sub>2</sub>O) δ = 176.03, 175.95, 174.67, 174.46, 171.85, 170.88, 102.56, 101.15, 83.78, 82.60, 80.08, 75.30, 75.00, 74.27, 73.66, 73.31, 72.39, 72.10, 71.06, 68.44, 68.20, 67.06, 60.83, 60.46, 54.16, 49.93, 22.33, 22.03 ppm. HRMS (ESI) calcd for C<sub>28</sub>H<sub>43</sub>N<sub>2</sub>O<sub>22</sub> [M-H<sup>+</sup>]<sup>-</sup>: 759.2313 Da; found: 759.231 m/z.

**(HA-4-S-PEG-S)<sub>2</sub>, 1-(β-D-Glucopyranuronyl-(1→3)-β-D-2-acetamido-2-deoxy-gluco-pyranosyl-(1→4)-β-D-glucopyranuronyl-(1→3)-β-D-2-acetamido-2-deoxy-β-D-glucopyranosyl)-thio-2-ethyloxy-2-ethylox-2-ethyl-disulfide (14)**

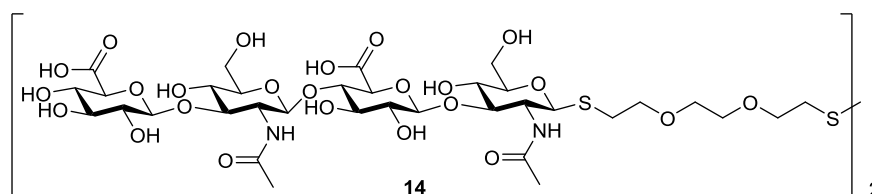

To a suspension of 1-(β-D-Glucopyranuronyl-(1→3)-β-D-2-acetamido-2-deoxy-gluco-pyranosyl-(1→4)-β-D-glucopyranuronyl-(1→3)-β-D-2-acetamido-2-deoxy-β-D-glucopyranosyl)-thio-2-ethyloxy-2-ethylox-2-ethyl-triphenylmethylthiol, HA-4-S-PEG-S-*Trt*<sup>5</sup> (58 mg, 0.05 mmol) in DCM/Triethylsilane 10:1 (1.1 mL), TFA/H<sub>2</sub>O 10:1 (1.1 mL) was added. The solution was stirred for 5 min, evaporated under reduced pressure and dried in high vacuum. The residue was dissolved in 0.1M NaOH (5 mL) saturated with oxygen (by constant air bubbling) and stirred at 35°C until TLC (EtOAc/MeOH/H<sub>2</sub>O 4.5:2.5:2, vanilin-staining) shows that the reaction is complete. The reaction mixture was diluted with water (20 mL), extracted once with hexane (10 mL) to remove triphenylmethane and evaporated under reduced pressure. The crude product was purified by HPLC (C-18, isocratic 95:5 H<sub>2</sub>O (+0,1%TFA) / MeCN (+0,1%TFA) for 12 min to 50:50 in 20 min), flow rate; 40 ml/min, detection UV(214 nm)). The product containing fractions were freeze dried to yield **14** as white powder (42 mg, 91%). <sup>1</sup>H NMR (700 MHz, D<sub>2</sub>O) δ = 5.18 (d, *J* = 3.9 Hz, 2H), 5.06 (t, *J* = 5.8 Hz, 4H), 4.92 (d, *J* = 6.4 Hz, 2H), 4.84 (dt, *J* = 5.1, 2.6 Hz, 4H), 4.79 (d, *J* = 10.3 Hz, 2H), 4.59 – 4.56 (m, 2H), 4.55 – 4.51 (m, 4H), 4.46 (s, 2H), 4.45 (d, *J* = 7.0 Hz, 2H), 4.42 – 4.39 (m, 2H), 4.31 (dt, *J* = 18.4, 9.1 Hz, 4H), 4.24 – 4.16 (m, 6H), 4.12 – 4.07 (m, 2H), 4.03 (t, *J* = 9.2 Hz, 2H), 3.89 (t, *J* = 8.8 Hz, 6H), 3.84 (t, *J* = 6.0 Hz, 2H), 3.82 – 3.78 (m, 5H), 3.74 (qdd, *J* = 10.7, 5.5, 1.3 Hz, 5H), 3.70 – 3.67 (m, 9H), 2.92 (td, *J* = 6.2, 1.6 Hz, 6H), 2.86 (dt, *J* = 13.5, 6.4 Hz, 2H), 2.12 (s, 6H), 2.08 (s, 6H) ppm. <sup>13</sup>C NMR (176 MHz, D<sub>2</sub>O) δ = 174.65, 174.46, 174.27, 174.18, 173.90, 100.89, 100.84, 99.87, 99.45, 99.39, 84.72, 79.67, 77.97, 77.13, 76.80, 76.77, 76.50, 76.44, 76.38, 75.65, 75.61, 75.52, 75.46, 75.32, 74.86, 74.80, 72.83, 72.77, 70.06, 69.38, 69.31, 68.39, 67.83, 67.77, 67.50, 67.46, 55.60, 54.42, 37.22, 30.23, 22.89, 22.68 ppm. HRMS (ESI) calcd for C<sub>68</sub>H<sub>108</sub>N<sub>4</sub>O<sub>48</sub>S<sub>4</sub> [M-2H<sup>+</sup>]<sup>2-</sup>: 938.251; found: 938.251 m/z.

### General Sulfation Procedure:

To a solution of the starting material in dry DMF ( $c = 0.02$  mol/l) sulfur trioxide pyridine complex (4 eq. per hydroxyl-group) was added and the solution was stirred for 4h at room temperature. Thereafter additional sulfur trioxide pyridine complex (2eq. per hydroxyl group) was added and the reaction mixture stirred for one hour. The reaction was stopped by the addition of 2 mL water, stirred for 2 minutes and the product precipitated by addition of sodium acetate (2.5-fold excess of used  $\text{SO}_3 \cdot \text{Py}$ -complex equivalents) solution in ethanol at  $0^\circ\text{C}$  for 30 min. The crude product was filtered off, washed three times with cold ethanol and desalted by dialysis against distilled water (MWCO=1000Da)

**Nona-sulfo hyaluronan tetrasaccharide triazol, 9s-HA-4-Triazol, 2,3,4,6-tetra-O-sulfo- $\beta$ -D-glucopyranuronyl-(1 $\rightarrow$ 3)-4,6-di-O-sulfo- $\beta$ -D-2-acetamido-2-deoxy-glucopyranosyl-(1 $\rightarrow$ 4)-2,3-di-O-sulfo- $\beta$ -D-glucopyranuronyl-(1 $\rightarrow$ 3)-4,6-di-O-sulfo- $\beta$ -D-2-acetamido-2-deoxy-glucopyranosyl-1,2,3-triazol (16)**

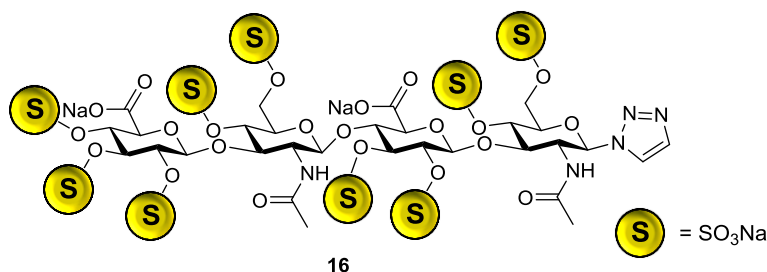

$\beta$ -D-glucopyranuronyl-(1 $\rightarrow$ 3)- $\beta$ -D-2-acetamido-2-deoxy-glucopyranosyl-(1 $\rightarrow$ 4)- $\beta$ -D-glucopyranuronyl-(1 $\rightarrow$ 3)- $\beta$ -D-2-acetamido-2-deoxy-glucopyranosyl-1,2,3-triazol **10** (60 mg, 0.072 mmol) was sulfated according to the general sulfation procedure to give **16** as colourless gum (97 mg, 61%).  $^1\text{H NMR}$  (700 MHz,  $\text{D}_2\text{O}$ )  $\delta = 8.22$  (s, 1H), 7.81 (s, 1H), 6.06 (d,  $J = 9.5$  Hz, 1H), 5.21 (d,  $J = 3.1$  Hz, 1H), 5.09 – 5.05 (m, 2H), 5.04 – 5.01 (m, 1H), 4.89 (dd,  $J = 4.4, 2.0$  Hz, 2H), 4.79 (s, 1H), 4.63 – 4.58 (m, 2H), 4.58 – 4.51 (m, 2H), 4.51 – 4.47 (m, 1H), 4.45 – 4.39 (m, 3H), 4.34 – 4.29 (m, 1H), 4.28 – 4.15 (m, 5H), 3.93 – 3.88 (m, 1H), 3.87 – 3.81 (m, 1H), 2.14 (s, 3H), 1.85 (s, 3H) ppm.  $^{13}\text{C NMR}$  (176 MHz,  $\text{D}_2\text{O}$ )  $\delta = 174.40, 174.36, 172.43, 172.19, 134.33, 125.09, 100.37$  (d,  $J = 11.2$  Hz), 99.98, 99.35 (d,  $J = 10.9$  Hz), 85.51, 78.94, 77.81, 77.74, 77.20, 77.12, 76.33 (d,  $J = 8.1$  Hz), 75.63, 75.31 (d,  $J = 10.4$  Hz), 75.17, 75.06, 73.95, 73.90, 72.90 (d,  $J = 10.2$  Hz), 67.36, 55.52, 54.98, 22.81,  $\delta$  22.09 (d,  $J = 6.2$  Hz) ppm. For MS-analysis see below.

**Nona-sulfo hyaluronan tetrasaccharide 5(6)TAMRA, 9s-HA-4-5(6)TAMRA, 2,3,4,6-tetra-O-sulfo- $\beta$ -D-glucopyranuronyl-(1 $\rightarrow$ 3)-4,6-di-O-sulfo- $\beta$ -D-2-acetamido-2-deoxy-glucopyranosyl-(1 $\rightarrow$ 4)-2,3-di-O-sulfo- $\beta$ -D-glucopyranuronyl-(1 $\rightarrow$ 3)-4,6-di-O-sulfo- $\beta$ -D-2-acetamido-2-deoxy-glucopyranosyl-1,2,3-triazol-4-yl-methyl-2-carbamoyl-5(6)-carboxytetramethylrhodamine (15A+15B)**

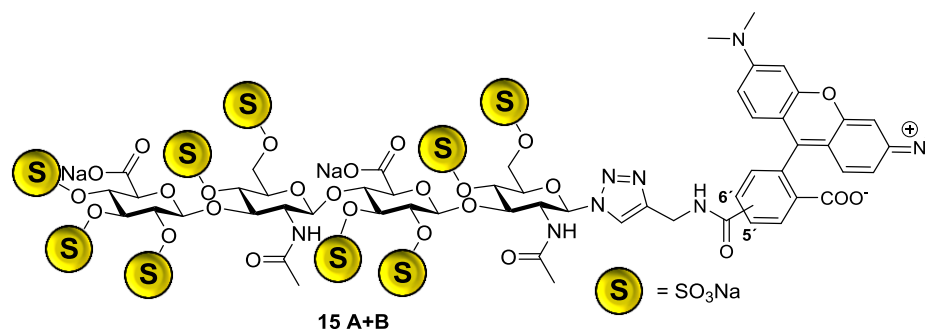

Hyaluronan tetrasaccharide (5')TAMRA, HA-4-(5')TAMRA,  $\beta$ -D-glucopyranuronyl-(1 $\rightarrow$ 3)- $\beta$ -D-2-acetamido-2-deoxy-glucopyranosyl-(1 $\rightarrow$ 4)- $\beta$ -D-glucopyranuronyl-(1 $\rightarrow$ 3)- $\beta$ -D-2-acetamido-2-deoxy-glucopyranosyl-1,2,3-triazol-4-yl-methyl-2-carbamoyl-5-carboxytetra-methylrhodamine **8A** (65 mg, 0.052 mmol) and Hyaluronan tetrasaccharide (6')TAMRA, HA-4-(6')TAMRA,  $\beta$ -D-glucopyranuronyl-(1 $\rightarrow$ 3)- $\beta$ -D-2-acetamido-2-deoxy-glucopyranosyl-(1 $\rightarrow$ 4)- $\beta$ -D-glucopyranuronyl-(1 $\rightarrow$ 3)- $\beta$ -D-2-acetamido-2-deoxy-glucopyranosyl-1,2,3-triazol-4-yl-methyl-2-carbamoyl-6'-carboxytetramethylrhodamine **8B** (51 mg, 0.040 mmol) were separately sulfated according to the general sulfation procedure to give **15A+15B** as dark violett powder (95 mg, 82% for 15A the 5'-Isomer) and (55 mg, 61% for **15B** the 6'-Isomer) <sup>1</sup>H NMR (700 MHz, D<sub>2</sub>O) of **15A** the 5'-isomer:  $\delta$  = 8.46 (s, 1H), 8.27 (s, 1H), 8.14 (d,  $J$  = 7.8 Hz, 1H), 7.58 (d,  $J$  = 7.8 Hz, 1H), 7.07 (d,  $J$  = 9.4 Hz, 2H), 6.81 – 6.69 (m, 2H), 6.12 – 6.04 (m, 2H), 6.03 (d,  $J$  = 9.6 Hz, 1H), 5.20 (d,  $J$  = 4.1 Hz, 1H), 5.08 – 5.04 (m, 2H), 5.01 (d,  $J$  = 4.1 Hz, 1H), 4.93 – 4.85 (m, 2H), 4.79 (s, 1H), 4.78 – 4.72 (m, 2H), 4.64 – 4.57 (m, 2H), 4.55 – 4.47 (m, 3H), 4.45 – 4.38 (m, 3H), 4.32 – 4.11 (m, 5H), 4.11 – 4.04 (m, 1H), 3.90 – 3.84 (m, 1H), 3.84 – 3.73 (m, 1H), 2.97 (s, 12H), 2.13 (s, 3H), 1.82 (s, 3H) ppm; <sup>13</sup>C NMR (176 MHz, D<sub>2</sub>O) of **15A** the 5'-isomer:  $\delta$  = 174.35, 174.21, 172.26, 171.94, 170.22, 168.66, 157.18, 156.67, 156.63, 145.25, 135.78, 135.03, 130.91, 130.65, 130.32, 128.88, 123.38, 113.99, 112.77, 100.35, 99.90, 99.43, 95.93, 85.70, 78.88, 77.75, 77.22, 77.09, 76.35, 75.75, 75.51, 75.23, 75.06, 73.78, 72.89, 67.37, 67.34, 55.49, 55.03, 40.04, 35.10, 22.82, 22.11 ppm. For MS-analysis see below.

<sup>1</sup>H NMR (700 MHz, D<sub>2</sub>O) of **15B** the 6'-isomer:  $\delta$  = 8.13 – 8.02 (m, 2H), 7.98 (d,  $J$  = 8.4 Hz, 1H), 7.67 (s, 1H), 6.90 (s, 2H), 6.65 – 6.58 (m, 1H), 6.55 (d,  $J$  = 9.4 Hz, 1H), 6.33 – 6.12 (m, 2H), 5.91 (d,  $J$  = 8.8 Hz, 1H), 5.19 (d,  $J$  = 3.7 Hz, 1H), 5.05 (d,  $J$  = 6.9 Hz, 1H), 5.02 (d,  $J$  = 6.0 Hz, 1H), 5.00 (d,  $J$  = 3.9 Hz, 1H), 4.87 (s, 1H), 4.82 (s, 1H), 4.79 (s, 1H), 4.60 – 4.49 (m, 5H), 4.47 – 4.35 (m, 4H), 4.30 (t,  $J$  = 9.3 Hz, 1H), 4.27 – 4.20 (m, 2H), 4.20 – 4.01 (m, 4H), 3.87 (t,  $J$  = 8.6 Hz, 1H), 3.82 (s, 1H), 2.93 (s, 12H), 2.10 (s, 3H), 1.79 (s, 3H) ppm. <sup>13</sup>C NMR (176 MHz, D<sub>2</sub>O) of **15B** the 6'-isomer:  $\delta$  = 174.51, 174.23, 172.29, 171.94, 170.11, 167.38, 156.94, 156.67, 156.44, 144.84, 137.08, 135.25, 132.55, 130.78, 130.53, 129.52, 128.38, 122.68, 113.72, 112.59, 112.51, 100.45, 99.68, 99.39, 95.99, 85.67, 78.59, 77.75, 77.37, 77.06, 76.39, 75.69, 75.34, 75.24, 75.19, 75.12, 73.81, 72.89, 67.34, 55.39, 55.22, 39.98, 35.31, 22.74, 22.04 ppm.

**Nona-sulfo hyaluronan hexasaccharide 5(6)TAMRA, 9s-HA-6-5(6)TAMRA, 2,3,4,6-tetra-O-sulfo- $\beta$ -D-glucopyranuronyl-(1 $\rightarrow$ 3)-4,6-di-O-sulfo- $\beta$ -D-2-acetamido-2-deoxy-glucopyranosyl-(1 $\rightarrow$ 4)-2,3,4,6-tetra-O-sulfo- $\beta$ -D-glucopyranuronyl-(1 $\rightarrow$ 3)-4,6-di-O-sulfo- $\beta$ -D-2-acetamido-2-deoxy-glucopyranosyl-(1 $\rightarrow$ 4)-2,3-di-O-sulfo- $\beta$ -D-glucopyranuronyl-(1 $\rightarrow$ 3)-4,6-di-O-sulfo- $\beta$ -D-2-acetamido-2-deoxy-glucopyranosyl-1,2,3-triazol-4-yl-methyl-2-carbamoyl-5(6)-carboxytetramethylrhodamine (19A+19B)**

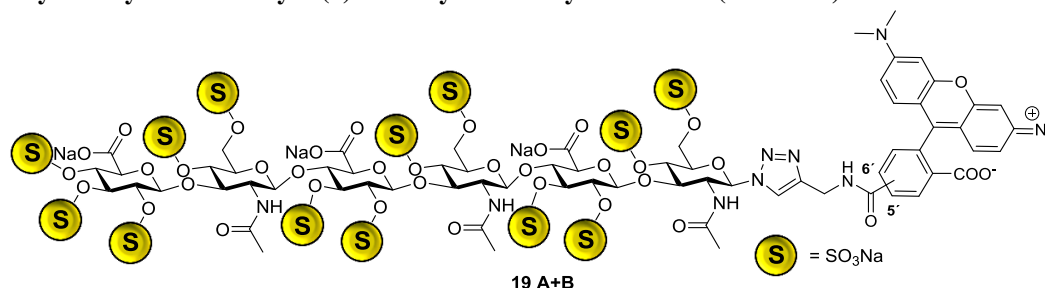

Hyaluronan hexasaccharide (5')TAMRA, HA-6-(5')TAMRA,  $\beta$ -D-glucopyranuronyl-(1 $\rightarrow$ 3)- $\beta$ -D-2-acetamido-2-deoxy-glucopyranosyl-(1 $\rightarrow$ 4)- $\beta$ -D-glucopyranuronyl-(1 $\rightarrow$ 3)- $\beta$ -D-2-acetamido-2-deoxy-glucopyranosyl-1,2,3-triazol-4-yl-methyl-2-carbamoyl-5'-carboxytetra-methylrhodamine **9A** (58 mg, 0.035 mmol) and Hyaluronan hexasaccharide (6')TAMRA, HA-6-(6')TAMRA,  $\beta$ -D-glucopyranuronyl-(1 $\rightarrow$ 3)- $\beta$ -D-2-acetamido-2-deoxy-glucopyranosyl-(1 $\rightarrow$ 4)- $\beta$ -D-glucopyranuronyl-(1 $\rightarrow$ 3)- $\beta$ -D-2-acetamido-2-deoxy-glucopyranosyl-1,2,3-triazol-4-yl-methyl-2-carbamoyl-6'-carboxytetramethylrhodamine **9B** (39 mg, 0.023 mmol) were separately sulfated according to the general sulfation procedure to give **19A+19B** as dark violett powder (65 mg, 61% for **19A** the 5'-Isomer) and (55 mg, 76% for **19B** the 6'-Isomer). <sup>1</sup>H NMR (700 MHz, D<sub>2</sub>O) of **19A** the 5'-isomer:  $\delta$  = 8.26 (s, 2H), 8.12 – 8.08 (m, 1H), 7.67 (d,  $J$  = 7.8 Hz, 1H), 7.14 (dd,  $J$  = 14.5, 9.5 Hz, 2H), 6.80 (d,  $J$  = 9.5 Hz, 2H), 6.32 (s, 2H), 6.02 (d,  $J$  = 9.6 Hz, 1H), 5.17 (s, 1H), 5.05 (d,  $J$  = 7.8 Hz, 1H), 5.04 (d,  $J$  = 3.8 Hz, 1H), 4.97 (d,  $J$  = 6.4 Hz, 1H), 4.91 (s, 1H), 4.88 – 4.79 (m, 4H), 4.76 – 4.73 (m, 2H), 4.63 – 4.47 (m, 6H), 4.47 – 4.38 (m, 5H), 4.35 – 4.08 (m, 11H), 3.90 – 3.78 (m, 4H), 3.05 (s, 12H), 2.15 (s, 3H), 2.09 (s, 3H), 1.84 (s, 3H) ppm. <sup>13</sup>C NMR (176 MHz, D<sub>2</sub>O)  $\delta$  = 174.70, 174.59, 174.25, 173.51, 173.18, 172.99, 169.33, 157.78, 156.82, 144.91, 139.86, 134.94, 134.65, 130.79, 130.41, 128.64, 127.60, 123.29, 113.91, 112.82, 101.40, 100.95, 100.05, 99.70, 99.45, 96.12, 85.71, 79.03, 78.60, 77.97, 77.80, 77.36, 76.78, 76.56, 76.11, 75.93, 75.77, 75.60, 75.36, 75.04, 74.53, 72.78, 67.52, 67.40, 67.34, 55.36, 55.09, 40.01, 35.01, 23.11, 22.79, 22.10 ppm. For MS-analysis see below.

<sup>1</sup>H NMR (700 MHz, D<sub>2</sub>O) of **19A** the 6'-isomer:  $\delta$  = 8.14 (d,  $J$  = 8.3 Hz, 1H), 8.05 (s, 1H), 7.99 (d,  $J$  = 7.9 Hz, 1H), 7.66 (s, 1H), 6.89 (s, 2H), 6.70 – 6.53 (m, 2H), 6.44 – 6.25 (m, 2H), 5.90 (d,  $J$  = 9.4 Hz, 1H), 5.19 (d,  $J$  = 4.2 Hz, 1H), 5.05 (d,  $J$  = 6.8 Hz, 1H), 5.03 (d,  $J$  = 6.1 Hz, 1H), 5.02 – 4.98 (m, 2H), 4.90 – 4.81 (m, 5H), 4.62 – 4.52 (m, 7H), 4.50 (s, 1H), 4.46 (s, 1H), 4.44 – 4.38 (m, 3H), 4.36 (d,  $J$  = 5.1 Hz, 1H), 4.34 – 4.29 (m, 2H), 4.29 – 4.23 (m, 1H), 4.23 – 4.11 (m, 5H), 4.10 – 4.06 (m, 1H), 4.03 (s, 1H), 3.92 – 3.80 (m, 4H), 2.99 (d,  $J$  = 28.9 Hz, 12H), 2.12 (s, 3H), 2.08 (s, 3H), 1.80 (s, 3H) ppm. <sup>13</sup>C NMR (176 MHz, D<sub>2</sub>O)  $\delta$  = 174.55, 174.17, 172.05, 171.69, 169.24, 167.43, 156.82, 156.54, 156.48, 144.74, 135.71, 133.03, 130.95, 130.74, 130.61, 129.47, 128.51, 122.70, 113.81, 112.60, 112.51, 100.64, 100.30, 100.21, 99.79, 99.35, 96.08, 85.73, 79.02, 78.53, 77.90, 77.80, 77.71, 77.60, 76.71, 76.61, 76.49, 76.34, 76.24, 75.82, 75.67, 75.44, 75.18, 75.08, 74.99, 73.66, 72.95, 67.46, 67.33, 55.24, 54.91, 40.11, 40.01, 35.37, 22.99, 22.68, 22.02 ppm.

**Nona-sulfo hyaluronan tetrasaccharide thiomethyl, 9s-HA-4-SMe, 2,3,4,6-tetra-O-sulfo- $\beta$ -D-glucopyranuronyl-(1 $\rightarrow$ 3)-4,6-di-O-sulfo- $\beta$ -D-2-acetamido-2-deoxy-glucopyranosyl-(1 $\rightarrow$ 4)-2,3-di-O-sulfo- $\beta$ -D-glucopyranuronyl-(1 $\rightarrow$ 3)-4,6-di-O-sulfo- $\beta$ -D-2-acetamido-2-deoxy-glucopyranosyl-1-thio-methyl (17)**

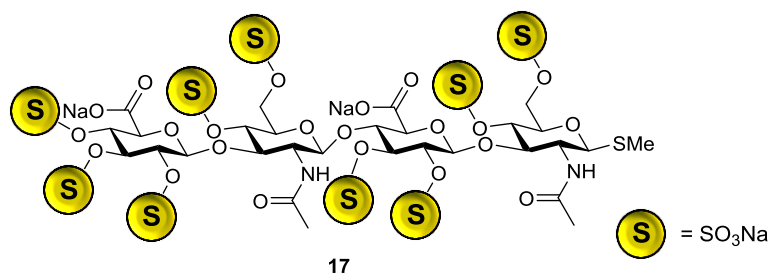

3- $\beta$ -D-Glucopyranuronyl-(1 $\rightarrow$ 3)- $\beta$ -D-2-acetamido-2-deoxy-gluco-pyranosyl-(1 $\rightarrow$ 4)- $\beta$ -D-glucopyranuronyl-(1 $\rightarrow$ 3)- $\beta$ -D-2-acetamido-2-deoxy-glucopyranosyl-1-thio-methyl **12** (35 mg, 0.043 mmol) was sulfated according to the general sulfation procedure to give **17** as colourless gum (36 mg, 47%).  $^1\text{H NMR}$  (700 MHz,  $\text{D}_2\text{O}$ )  $\delta$  = 5.21 – 5.17 (m, 1H), 5.06 (dd,  $J$  = 10.2 Hz, 6.6 Hz, 2H), 4.98 (d,  $J$  = 4.2 Hz, 1H), 4.90 – 4.86 (m, 3H), 4.65 – 4.61 (m, 1H), 4.59 (t,  $J$  = 3.5 Hz, 1H), 4.55 – 4.49 (m, 3H), 4.42 – 4.36 (m, 2H), 4.31 – 4.24 (m, 2H), 4.16 (dd,  $J$  = 11.4 Hz, 6.3 Hz, 2H), 4.09 (dd,  $J$  = 11.4, 7.5 Hz, 1H), 3.97 – 3.81 (m, 5H), 2.16 (s, 3H), 2.08 (s, 3H), 2.06 (s, 3H) ppm.  $^{13}\text{C NMR}$  (176 MHz,  $\text{D}_2\text{O}$ )  $\delta$  = 174.74, 174.39, 171.98, 171.54, 99.98, 99.90, 99.34, 99.25, 84.40, 80.04, 79.97, 77.99, 77.91, 77.83, 77.79, 77.65, 76.55, 76.47, 76.09, 76.05, 75.96, 75.89, 75.64, 75.58, 75.39, 75.20, 75.12, 73.55, 73.47, 72.99, 72.91, 67.77, 67.68, 67.39, 67.31, 55.35, 53.76, 22.59, 22.55, 12.06 ppm. For MS-analysis see below.

**Nona-sulfo hyaluronan tetrasaccharide triazol, 9s-HA-4-H,H; 2,3,4,6-tetra-O-sulfo- $\beta$ -D-glucopyranuronyl-(1 $\rightarrow$ 3)-4,6-di-O-sulfo- $\beta$ -D-2-acetamido-2-deoxy-glucopyranosyl-(1 $\rightarrow$ 4)-2,3-di-O-sulfo- $\beta$ -D-glucopyranuronyl-(1 $\rightarrow$ 3)-4,6-di-O-sulfo- $\beta$ -D-2-acetamido-1,5-anhydro-2-deoxy-sorbitol (18)**

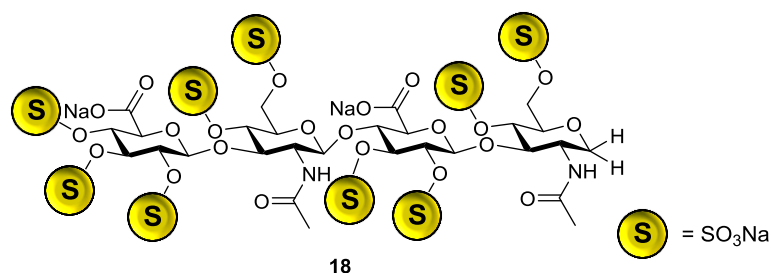

3- $\beta$ -D-Glucopyranuronyl-(1 $\rightarrow$ 3)- $\beta$ -D-2-acetamido-2-deoxy-gluco-pyranosyl-(1 $\rightarrow$ 4)- $\beta$ -D-glucopyranuronyl-(1 $\rightarrow$ 3)- $\beta$ -D-2-acetamido-1,5-anhydro-2-deoxy-sorbitol **13** (43 mg, 0.056 mmol) was sulfated according to the general sulfation procedure to give **18** as colourless powder (70 mg, 72%).  $^1\text{H NMR}$  (700 MHz,  $\text{D}_2\text{O}$ )  $\delta$  = 5.19 (d,  $J$  = 4.0 Hz, 1H), 5.09 – 5.03 (m, 2H), 4.93 (d,  $J$  = 6.8 Hz, 1H), 4.82 (d,  $J$  = 7.2 Hz, 1H), 4.77 (dd,  $J$  = 5.2, 3.2 Hz, 1H), 4.59 – 4.54 (m, 2H), 4.46 (t,  $J$  = 4.5 Hz, 1H), 4.43 (d,  $J$  = 7.0 Hz, 1H), 4.42 – 4.39 (m, 2H), 4.36 – 4.27 (m, 3H), 4.18 (dt,  $J$  = 11.1, 5.1 Hz, 3H), 4.04 – 3.95 (m, 4H), 3.91 – 3.80 (m, 2H), 3.41 (td,  $J$  = 8.6, 7.5, 4.2 Hz, 1H), 2.10 (s, 3H), 2.05 (s, 3H) ppm.  $^{13}\text{C NMR}$  (176 MHz,  $\text{D}_2\text{O}$ )  $\delta$  = 174.43, 173.85, 173.57, 100.55, 99.68, 99.34, 79.54, 78.92, 77.93, 77.72, 77.35, 77.13, 77.03, 76.22, 75.49, 75.44, 75.26, 74.70, 72.76 (d,  $J$  = 7.3 Hz), 67.46, 66.63, 64.00, 55.52, 49.12, 22.83, 22.35 ppm. For MS-analysis see below.

**(9s-HA-4-S-PEG-S)<sub>2</sub>, 2,3,4,6-tetra-O-sulfo-β-D-glucopyranuronyl-(1→3)-4,6-di-O-sulfo-β-D-2-acetamido-2-deoxy-glucopyranosyl-(1→4)-2,3-di-O-sulfo-β-D-glucopyranuronyl-(1→3)-4,6-di-O-sulfo-β-D-2-acetamido-2-deoxy-glucopyranosyl-1-thio-2-ethyloxy-2-ethyl-2-ethyl-disulfide (20)**

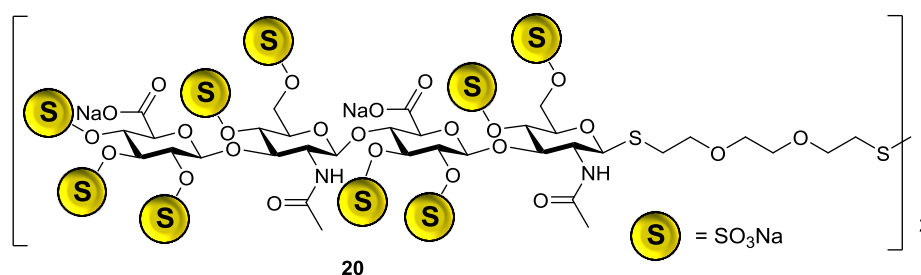

1-(β-D-Glucopyranuronyl-(1→3)-β-D-2-acetamido-2-deoxy-gluco-pyranosyl-(1→4)-β-D-glucopyranuronyl-(1→3)-β-D-2-acetamido-2-deoxy-β-D-glucopyranosyl)-thio-2-ethyloxy-2-ethyl-2-ethyl-disulfide **14** (40 mg, 0.021 mmol) was sulfated according to the general sulfation procedure to give **20** as colourless gum (60 mg, 74%). <sup>1</sup>H NMR (700 MHz, D<sub>2</sub>O) δ = 5.18 (d, *J* = 3.9 Hz, 1H), 5.08 – 5.04 (m, 2H), 4.92 (d, *J* = 6.4 Hz, 1H), 4.87 – 4.82 (m, 2H), 4.79 (d, *J* = 10.3 Hz, 1H), 4.59 – 4.56 (m, 1H), 4.55 – 4.51 (m, 2H), 4.46 (s, 1H), 4.45 (d, *J* = 7.0 Hz, 1H), 4.42 – 4.39 (m, 1H), 4.34 – 4.27 (m, 2H), 4.24 – 4.16 (m, 3H), 4.12 – 4.07 (m, 1H), 4.03 (t, *J* = 9.2 Hz, 1H), 3.92 – 3.87 (m, 3H), 3.87 – 3.82 (m, 1H), 3.82 – 3.78 (m, 2H), 3.77 – 3.70 (m, 2H), 3.70 – 3.67 (m, 4H), 2.96 – 2.91 (m, 3H), 2.86 (dt, *J* = 13.5, 6.4 Hz, 1H), 2.12 (s, 3H), 2.08 (s, 3H) ppm. <sup>13</sup>C NMR (176 MHz, D<sub>2</sub>O) δ = 174.65, 174.46, 174.27, 173.90, 100.86 (d, *J* = 8.5 Hz), 99.87, 99.42 (d, *J* = 11.1 Hz), 84.72, 79.67, 79.37, 79.25, 77.97, 77.13, 76.78 (d, *J* = 6.2 Hz), 76.50, 76.44, 76.38, 75.63 (d, *J* = 5.4 Hz), 75.49 (d, *J* = 11.0 Hz), 75.32, 74.83 (d, *J* = 9.9 Hz), 72.80 (d, *J* = 10.9 Hz), 70.06, 69.38, 69.31, 68.39, 67.80 (d, *J* = 9.7 Hz), 67.48 (d, *J* = 7.6 Hz), 55.60, 54.42, 37.22, 30.23, 22.89, 22.68 ppm. For MS-analysis see below.

**Di-sulfo hyaluronan tetrasaccharide (2s-HA-4-N<sub>3</sub>; β-D-glucopyranuronyl-(1→3)- β-D-2-acetamido-2-deoxy-6-sodium sulfo-glucopyranosyl-(1→4)- β-D-glucopyranuronyl-(1→3)- β-D-2-acetamido-2-deoxy-6-sodium sulfo-glucopyranosyl-1-azide (21)**

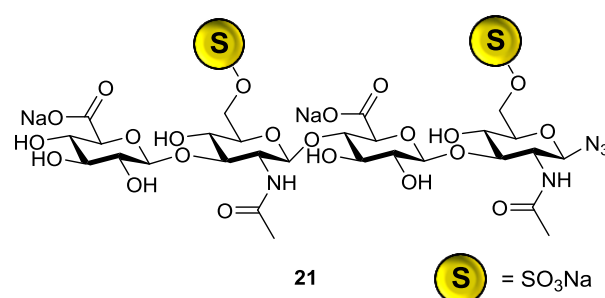

Respective amount of HA-4-azide **5** (55 mg, 0.069 mmol) was dissolved in dry DMF (~10 wt%) and kept under an inert argon atmosphere. Sulfur trioxide pyridine complex (66 mg; 0.412 mmol, 6.0 eq.) was added at 0 °C. After 1 h of stirring, the ice bath was removed and the solution was stirred over night at room temperature. The reaction was quenched with sodium acetate (68 mg, 0.829 mmol, 2.0 eq./PySO<sub>3</sub>) in methanol. The solvent was evaporated under reduced pressure, the residue was dissolved in water and chromatographed on Macro-Prep<sup>®</sup> DEAE resin (20 mm x 180 mm, gradient: 0 – 1 M NaCl-solution, flow rate: 6 mL·min<sup>-1</sup>). The product was replaced from Macro-Prep<sup>®</sup> DEAE resin by approximately 0,4 M NaCl-solution. Product fractions were combined, evaporated under reduced pressure and desalted two times by Sephadex G-10 (25 mm x 220 mm, eluent: deionized water). Freeze drying of the product-containing fractions gave a white, fluffy powder (26 mg,

35 %). **<sup>1</sup>H-NMR (700 MHz, D<sub>2</sub>O):** δ [ppm] = 4.86 (d, *J*<sub>1,2</sub> = 8.5 Hz, 1H, H-1/I); 4.63 (d, *J*<sub>1,2</sub> = 9.0 Hz, 1H, H-1/III); 4.56 (d, *J*<sub>1,2</sub> = 8.5 Hz, 1H, H-1/II); 4.54 (d, *J*<sub>1,2</sub> = 8.2 Hz, 1H, H-1/IV); 4.41 -4.39 (dd, *J* = 10.0, 5.5 Hz, 2H, H-6'/I, H-6'/III); 4.28 - 4.26 (dd, *J* = 10.0, 5.5 Hz, 2H, H-6''/I, H-6''/III); 3.95 - 3.91 (m, 2H, H-5/IV; H-5/II); 3.90 - 3.86 (m, 2H, H-2/I; H-2/III); 3.85 - 3.78 (m, 4H, H-4/II; H-3/I, H-3/III, H-5/I); 3.75 (m, 1H, H-5/III); 3.68 - 3.61 (m, 3H, H-3/II; H-4/I, H-4/III), 3.59 (m, 1H, H-4/IV); 3.54 (m, 1H, H-3/IV); 3.40 (m, 1H, H-2/II); 3.37 (m, 1H, H-2/IV); 2.06 (s, 3H, CH<sub>3</sub>/III); 2.04 (s, 3H, CH<sub>3</sub>/I). **<sup>13</sup>C-NMR (176 MHz, D<sub>2</sub>O):** δ [ppm] = 174.80 (NC=O/III), 174.78 (NC=O/I), 173.37 (COOH/IV), 172.08 (COOH/II), 103.00 (C-1/IV), 102.73 (C-1/II), 101.22 (C-1/III), 88.60 (C-1/I), 82.20 (C-3/III), 81.76 (C-3/I), 80.86 (C-4/II), 75.40 (C-5/I), 75.14 (C-3/IV), 74.98 (C-5/II), 74.62 (C-5/IV), 73.72 (C-3/II), 73.26 (C-5/III), 72.55 (C-2/IV), 72.17 (C-2/II), 71.37 (C-4/IV), 68.17 (C-4/III), 67.92 (C-4/I), 67.05 (C-6/III), 66.95 (C-6/I), 54.17 (C-2/III), 53.91 (C-2/I), 22.44 (NHCOCH<sub>3</sub>/III), 22.19 (NHCOCH<sub>3</sub>/I). For MS-analysis see below.

**Penta-sulfo hyaluronan tetrasaccharide (5s-HA-4-N<sub>3</sub>; β-D-2,3,4-sodium sulfo-glucopyranuronyl-(1→3)- β-D-2-acetamido-2-deoxy-glucopyranosyl-(1→4)- β-D-2,3-sodium-sulfo-glucopyranuronyl-(1→3)- β-D-2-acetamido-2-deoxy-glucopyranosyl-1-azide sodium salt (22)**

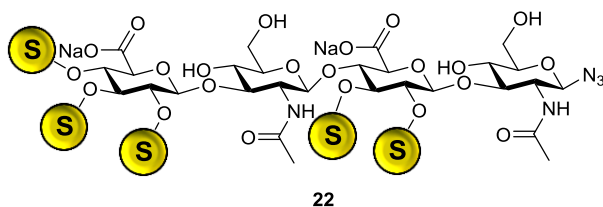

HA-4-azide **5** (50 mg, 0.062 mmol) was dissolved in 1 mL dry DMF, freshly dried molsieve powder (4 Å) and phenyl boronic acid (114 mg, 0.936 mmol) was added. The mixture was stirred at 80 °C under inert atmosphere overnight. Sulfur trioxide pyridine complex (199 mg, 1.248 mmol, 4.0 eq./OH) was added and stirred for 1 h at 40 °C. The reaction was quenched by stirring the solution with sodium acetate (205 mg, 2.501 mmol, 2.0 eq./PySO<sub>3</sub>) dissolved in 5 mL methanol for 10 min at room temperature. Solvent was evaporated under reduced pressure, the residue was suspended in water and filtered over a filter paper. The residue was extensively washed with water (5 x 5 mL) and the filtrate was evaporated under reduced pressure. Intense Dialysis against water (cellulose acetate membrane; MWCO = 100 – 500 Da) for 3 days and freeze drying of the clear liquid gave a white, fluffy powder (38 mg, 45 %) **<sup>1</sup>H NMR (700 MHz, D<sub>2</sub>O)** δ [ppm] = 5.18 (s, 1H, H-3/IV), 5.08 -5.05 (m, 2H, H-1/III, H-1/I), 5.06-5.02 (m, 2H, H-1/II, H-1/IV), 4.92 (s, 1H, H-4/IV), 4.48 (s, 2H, H-3/II, H-5/I), 4.46 – 4.45 (dd, *J* = 4.4, 2.0 Hz, 2H, H-5/IV; H-5/II), 4.42 – 4.30 (m, 2H, H-5/III, H-2/I); 4.32 (s, 2H, H-3/I, H-3/III), 4.03 – 4.01 (m, 2H, H-2/IV, H-2/II), 3.90 – 3.84 (m, 3H, H-6''/III; H-4/I, H-4/III), 3.65-3.55 (m, 2H, H-6'/I, H-6'/III), 2.14 (s, 6H, CH<sub>3</sub>/III, CH<sub>3</sub>/I). **<sup>13</sup>C NMR (176 MHz, D<sub>2</sub>O)** δ [ppm] = 181.09 (NC=O/III), 174.98 (NC=O/I), 174.74 (COOH/IV), 174.73 (COOH/II), 100.58 (C-1/IV), 100.16 (C-1/II), 99.30 (C-1/III), 88.31 (C-1/I), 79.54 (C-4/II), 78.70 (C-3/III), 77.95 (C-2/IV, C-2/II), 76.87 (C-5/I), 75.47 (C-3/IV, C-3/II), 75.13 (C-5/II), 74.64 (C-3/I, C-3/III), 69.07 (C-5/IV), 68.68 (C-4/III, C-4/I), 60.59 (C-6/III, C-6/I), 55.61 (C-2/III), 54.47 (C-2/I), 22.81(NHCOCH<sub>3</sub>/III), 22.57 (NHCOCH<sub>3</sub>/I). ESI-MS could not be detected due to insufficient ionization.

**Hepta-sulfo hyaluronan tetrasaccharide (7s-HA-4-N<sub>3</sub>; β-D-2,3,4-sodium sulfo-glucopyranuronyl-(1→3)- β-D-2-acetamido-2-deoxy-4-sodium sulfo-glucopyranosyl-(1→4)- β-D-glucopyranuronyl-(1→3)- β-D-2-acetamido-2-deoxy-4-sodium sulfo -glucopyranosyl-1-azide sodium salt (23)**

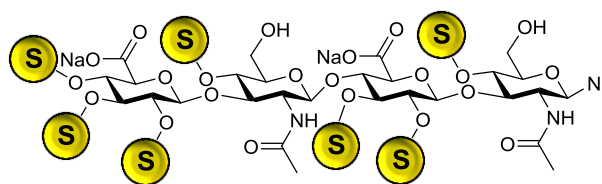

23

HA-4-azide **5** (50 mg, 0.062 mmol) was dissolved in 1 mL dry pyridine, 4,4'-Dimethoxytrityl chloride (211 mg; 0.623 mmol, 10.0 eq.) was added and the solution was stirred at 85 °C under inert atmosphere overnight. Sulfur trioxide pyridine complex (278 mg, 1.747 mmol, 4.0 eq./OH) was added and stirred for 6 h at 40 °C. The reaction was quenched by stirring the solution with sodium acetate (287 mg, 3.495 mmol, 2.0 eq./PySO<sub>3</sub>) and a solid precipitated in methanol. The solid was filtered over a filter paper, re-dissolved in water and treated with 2 mL of 1,1,1,3,3,3-Hexafluoro-2-propanol for 40 min. The solvent was evaporated under reduced pressure. Intense Dialysis against water (cellulose acetate membrane; MWCO = 100 – 500 Da) for 3 days and freeze drying of the clear liquid gave a white, fluffy powder (37 mg, 38 %). <sup>1</sup>H NMR (700 MHz, D<sub>2</sub>O) δ [ppm] = 5.20 (s, 1H, H-3/IV), 5.09 -5.02 (m, 3H, H-1/III, H-1/I, H-1/II), 4.89 (dd, *J* = 4.4, 2.0 Hz, 2H, H-1/IV, H-4/IV), 4.79 (s, 1H, H-3/II), 4.56 – 4.54 (m, 3H, H-3/II, H-4/I, H-4/III), 4.42 – 4.39 (m, 3H, H-5/II, H-5/III, H-2/I), 4.32 (s, 2H, H-3/I, H-3/III), 3.99 – 3.97 (m, 1H, H-2/IV), 3.90 – 3.84 (m, 3H, H-2/II, H-6''/I, H-6''/III ), 3.65-3.55 (m, 2H, H-6'/I, H-6'/III ), 2.14 (s, 6H, CH<sub>3</sub>/III; CH<sub>3</sub>/I) ppm. <sup>13</sup>C NMR (176 MHz, D<sub>2</sub>O) δ [ppm] = 175.02 (NC=O/III), 174.34 (NC=O/I), 171.79 (COOH/IV), 171.51 (COOH/II), 100.36 (C-1/IV), 100.04 (C-1/II), 99.35 (C-1/III), 88.29 (C-1/I), 78.94 (C-4/II, C-4/IV ), 77.76 (C-3/III), 76.41 (C-2/IV, C-2/II), 75.80 (C-5/I), 75.17 (C-3/IV, C-3/II), 74.60 (C-5/II, C-5/IV ), 74.09 (C-3/I, C-3/III ), 72.93 (C-4/III, C-4/I), 60.99 (C-6/III, C-6/I), 55.42 (C-2/III), 54.47, 22.81 (NHCOCH<sub>3</sub>/III), 22.57 (NHCOCH<sub>3</sub>/I). ESI-MS could not be detected due to insufficient ionization.

**Penta-sulfo hyaluronan disaccharide azide, 5s-HA-2-N<sub>3</sub>, 2,3,4,6-tetra-O-sulfo-β-D-glucopyranuronyl-(1→3)-4,6-di-O-sulfo-β-D-2-acetamido-2-deoxy-glucopyranosyl-1-azide (24)**

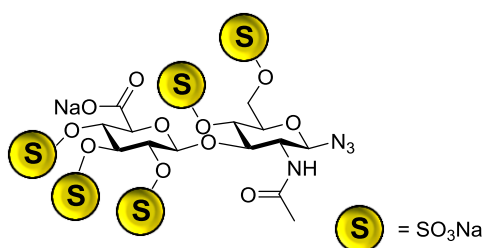

24

β-D-glucopyranuronyl-(1→3)-β-D-2-acetamido-2-deoxy-glucopyranosyl-azide **4** (40 mg, 0.010 mmol) was sulfated according to the general sulfation procedure to give **24** as colourless powder (65 mg, 72%). <sup>1</sup>H NMR (700 MHz, D<sub>2</sub>O) δ = 5.28 (s, 1H), 5.13 (d, *J* = 6.5 Hz, 1H), 5.01 (d, *J* = 9.2 Hz, 1H), 4.89 (s, 1H), 4.62 (d, *J* = 11.3 Hz, 1H), 4.48 (d, *J* = 6.6 Hz, 1H), 4.36 (t, *J* = 9.1 Hz, 1H), 4.22 (dt, *J* = 18.7, 9.9 Hz, 2H), 4.03 (t, *J* = 8.6 Hz, 1H), 3.85 (t, *J* = 9.1 Hz, 1H), 2.13 (s, 3H) ppm. <sup>13</sup>C NMR (176 MHz, D<sub>2</sub>O) δ = 174.84, 99.35, 87.93, 77.65, 75.20, 74.85, 74.50, 73.65, 67.35, 55.02, 22.31 ppm. For MS-analysis see below.



**Nona-sulfo hyaluronan hexasaccharide azide, 13s-HA-6-N<sub>3</sub>, 2,3,4,6-tetra-O-sulfo-β-D-glucopyranuronyl-(1→3)-4,6-di-O-sulfo-β-D-2-acetamido-2-deoxy-glucopyranosyl-(1→4)-2,3,4,6-tetra-O-sulfo-β-D-glucopyranuronyl-(1→3)-4,6-di-O-sulfo-β-D-2-acetamido-2-deoxy-glucopyranosyl-(1→4)-2,3-di-O-sulfo-β-D-glucopyranuronyl-(1→3)-4,6-di-O-sulfo-β-D-2-acetamido-2-deoxy-glucopyranosyl-1-azide (26)**

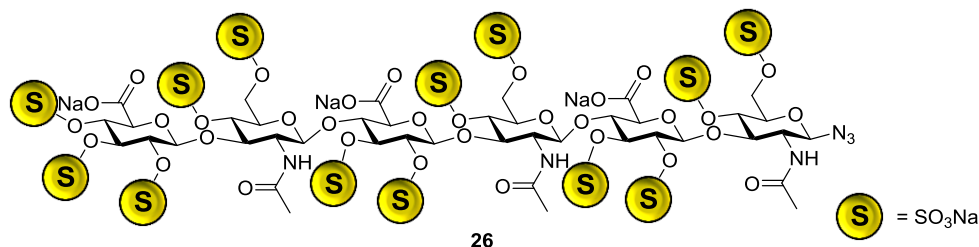

β-D-glucopyranuronyl-(1→3)-β-D-2-acetamido-2-deoxy-glucopyranosyl-(1→4)-β-D-glucopyranuronyl-(1→3)-β-D-2-acetamido-2-deoxy-glucopyranosyl-(1→4)-β-D-glucopyranuronyl-(1→3)-β-D-2-acetamido-2-deoxy-glucopyranosyl-azide **6** (72 mg, 0.061 mmol) was sulfated according to the general sulfation procedure to give **26** as colourless powder (130 mg, 83%). <sup>1</sup>H NMR (700 MHz, D<sub>2</sub>O) δ = 5.18 (d, *J* = 4.0 Hz, 1H), 5.07 – 5.03 (m, 2H), 4.98 (d, *J* = 6.6 Hz, 1H), 4.94 (d, *J* = 5.8 Hz, 1H), 4.91 (d, *J* = 9.3 Hz, 1H), 4.89 (dd, *J* = 4.5, 2.0 Hz, 1H), 4.87 – 4.82 (m, 3H), 4.63 (s, 1H), 4.60 – 4.53 (m, 4H), 4.49 (t, *J* = 3.4 Hz, 1H), 4.43 (d, *J* = 7.0 Hz, 1H), 4.41 (dd, *J* = 6.1, 2.5 Hz, 1H), 4.39 – 4.37 (m, 1H), 4.36 – 4.27 (m, 5H), 4.23 – 4.15 (m, 4H), 4.09 (t, *J* = 9.2 Hz, 1H), 4.01 – 3.95 (m, 2H), 3.94 – 3.82 (m, 5H), 2.14 (s, 3H), 2.11 (d, *J* = 1.8 Hz, 6H) ppm. <sup>13</sup>C NMR (176 MHz, D<sub>2</sub>O) δ = 174.98, 174.53, 173.47, 173.40, 173.22, 100.95 (d, *J* = 12.7 Hz), 100.47, 100.40, 100.32, 99.81, 99.77, 99.37 (d, *J* = 13.9 Hz), 88.37 (d, *J* = 12.7 Hz), 78.94, 78.89, 78.68, 78.62, 77.88, 77.80, 77.78, 77.38, 76.60, 76.54, 76.28, 75.78, 75.75, 75.42, 75.34, 75.23, 75.07, 75.04, 74.55, 74.49, 74.43, 72.87, 72.81, 67.53 (d, *J* = 9.2 Hz), 67.40 (d, *J* = 8.2 Hz), 55.36, 55.01, 54.51, 23.13, 23.11, 22.80, 22.77, 22.60, 22.57 ppm. For MS-analysis see below.

### 3. NMR and MS-Spectra

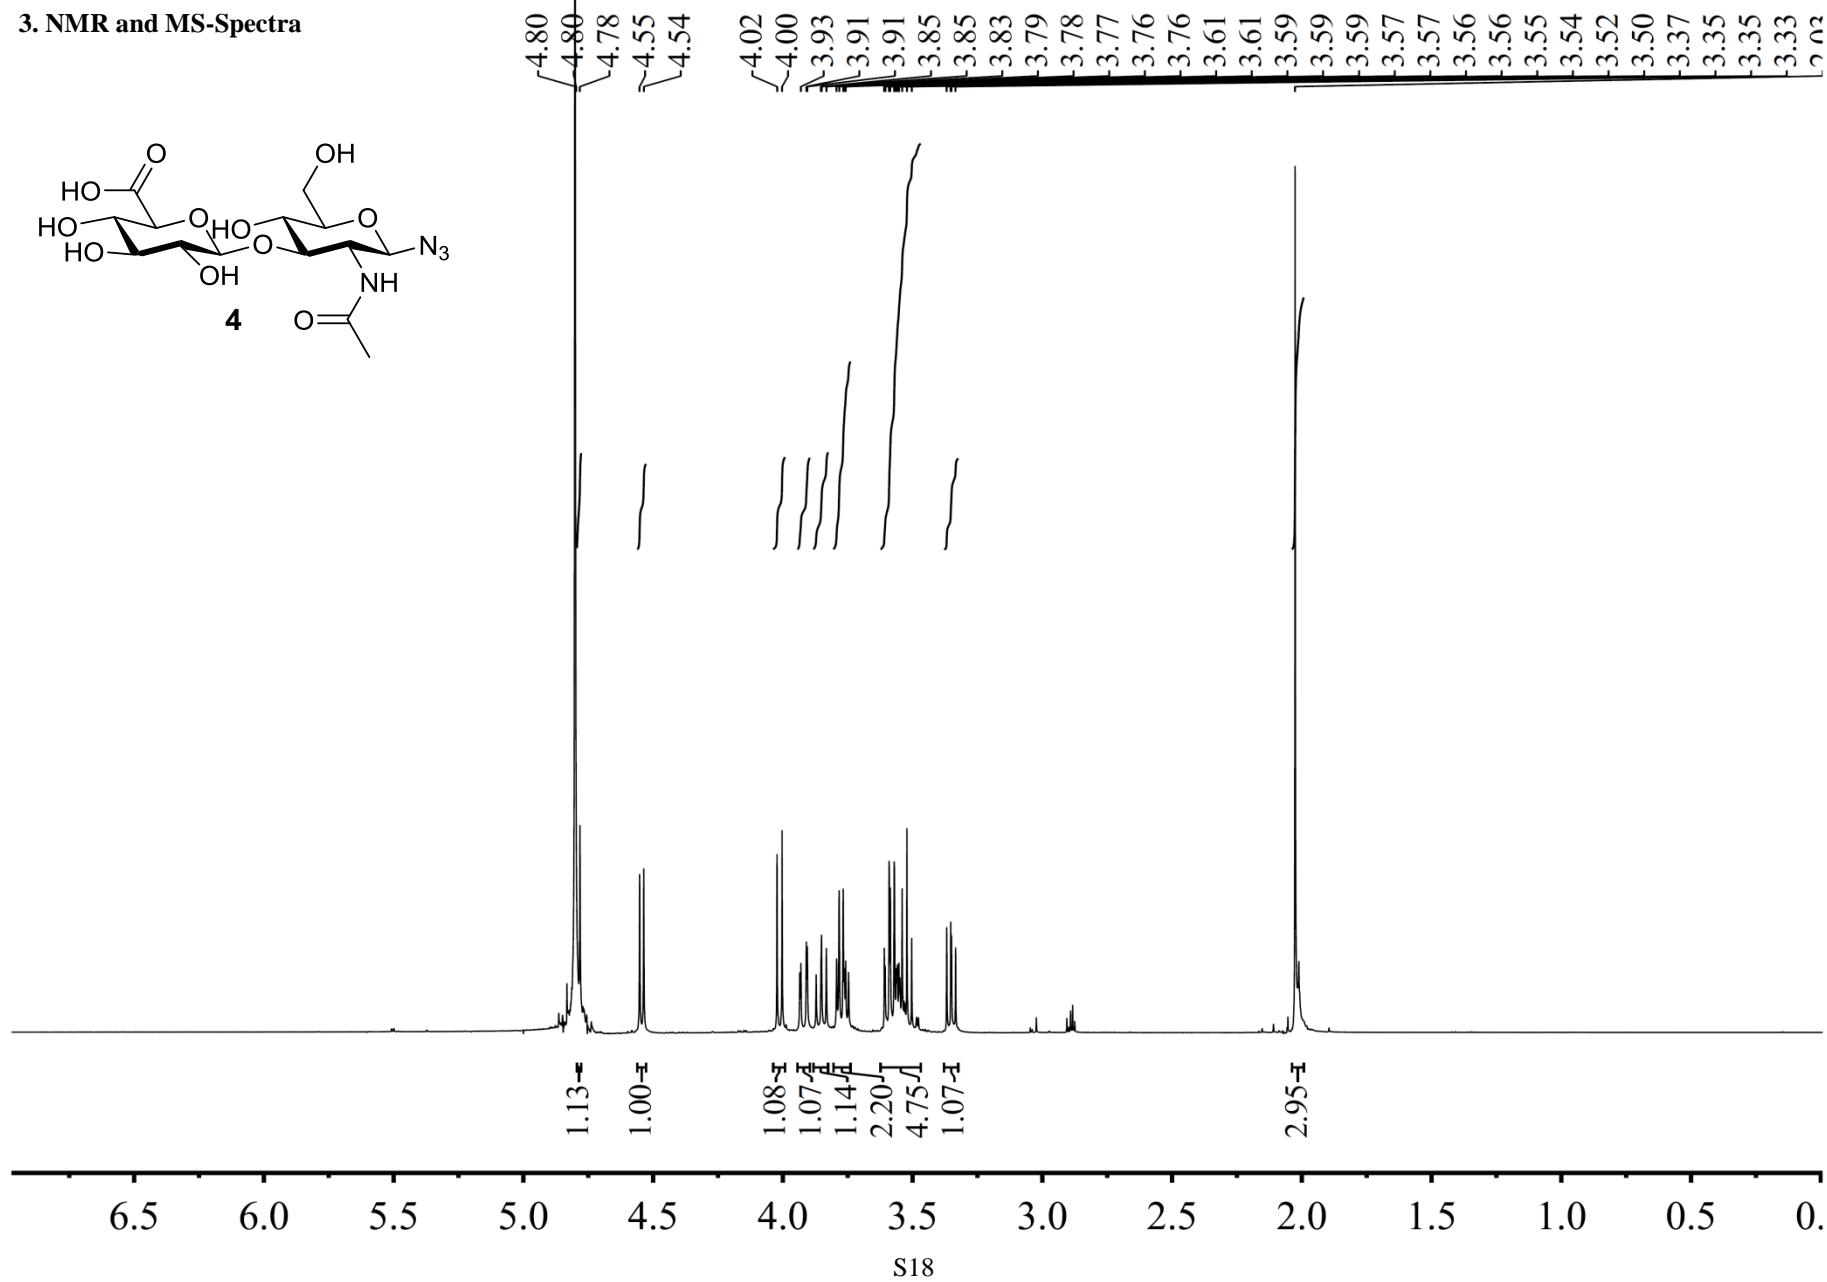

~174.78  
~172.14

-102.65

-88.50  
82.59  
77.45  
75.03  
74.18  
72.41  
71.10  
68.09  
60.49  
-53.77

-22.15

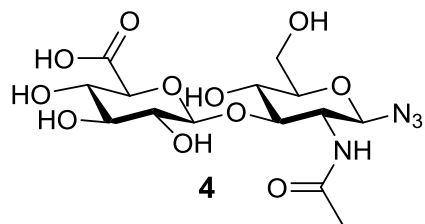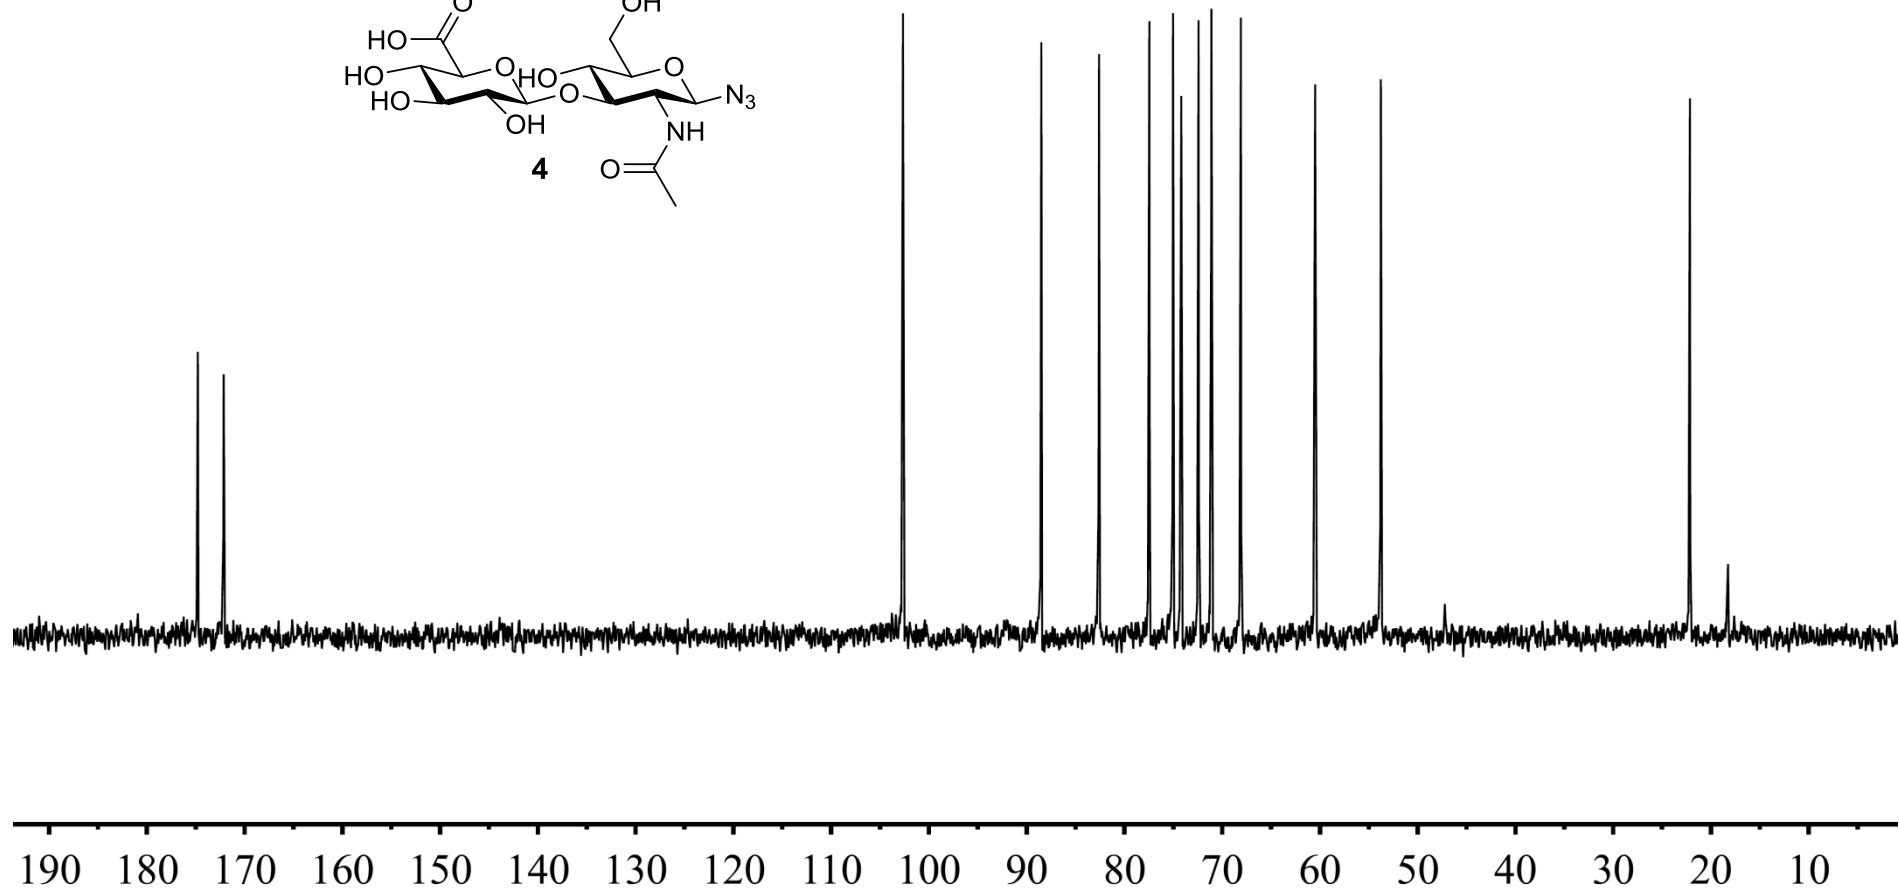

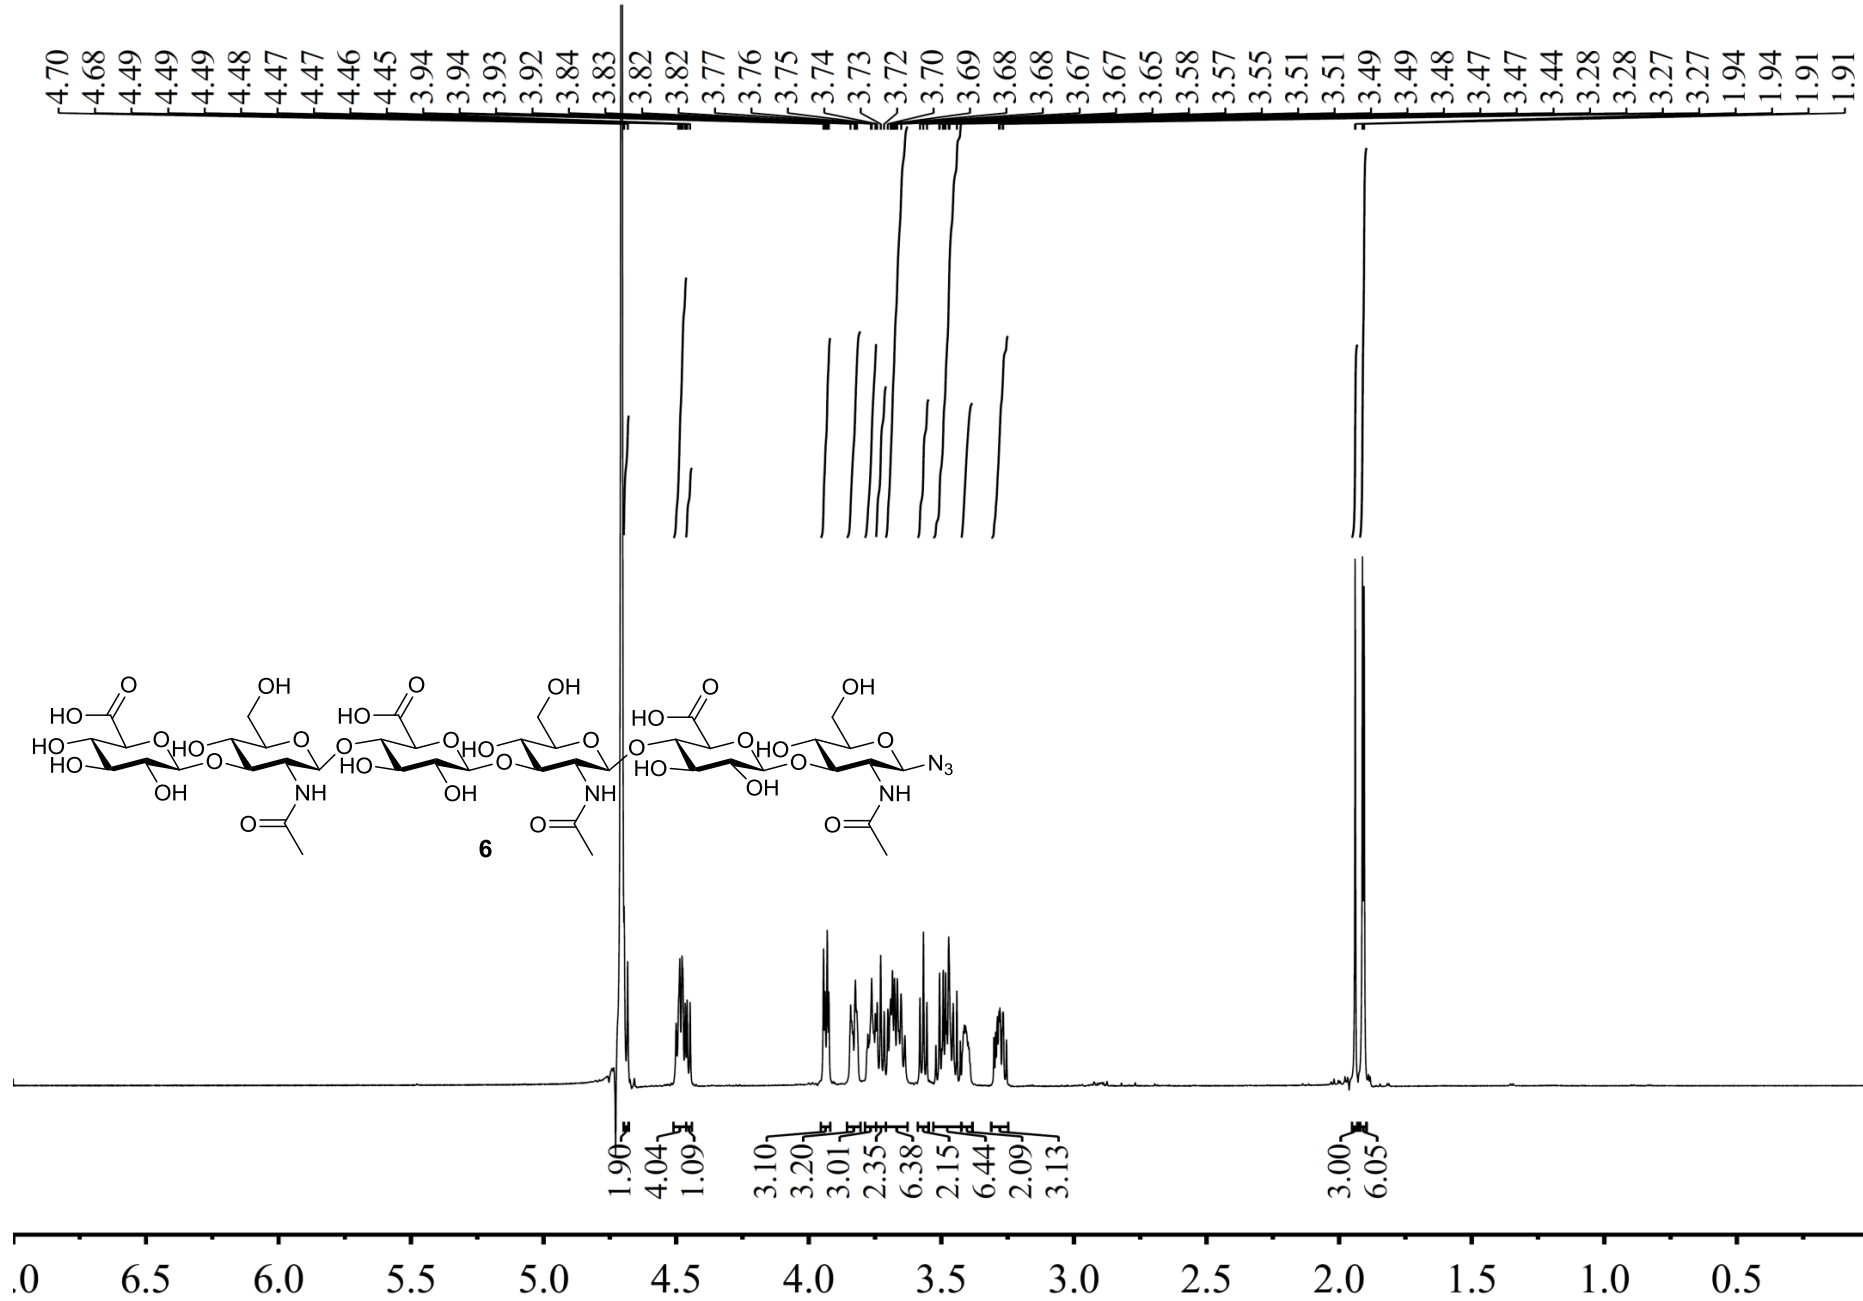

174.77  
174.69  
174.68  
171.95  
170.96

102.89  
102.82  
102.59  
101.15  
101.15  
88.48  
82.62  
82.34  
80.08  
77.46  
75.31  
75.01  
74.23  
73.64  
73.64  
73.32  
73.31  
72.40  
72.04  
71.08  
68.22  
68.15  
68.04  
60.50  
60.47  
60.47  
54.29  
54.17  
53.89  
22.35  
22.17

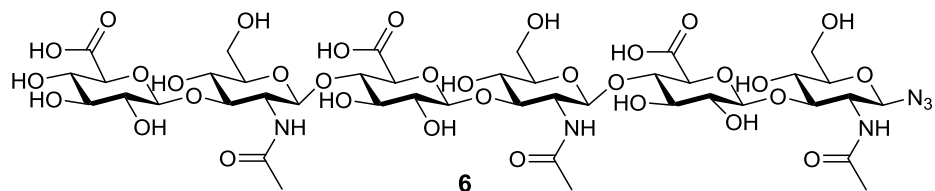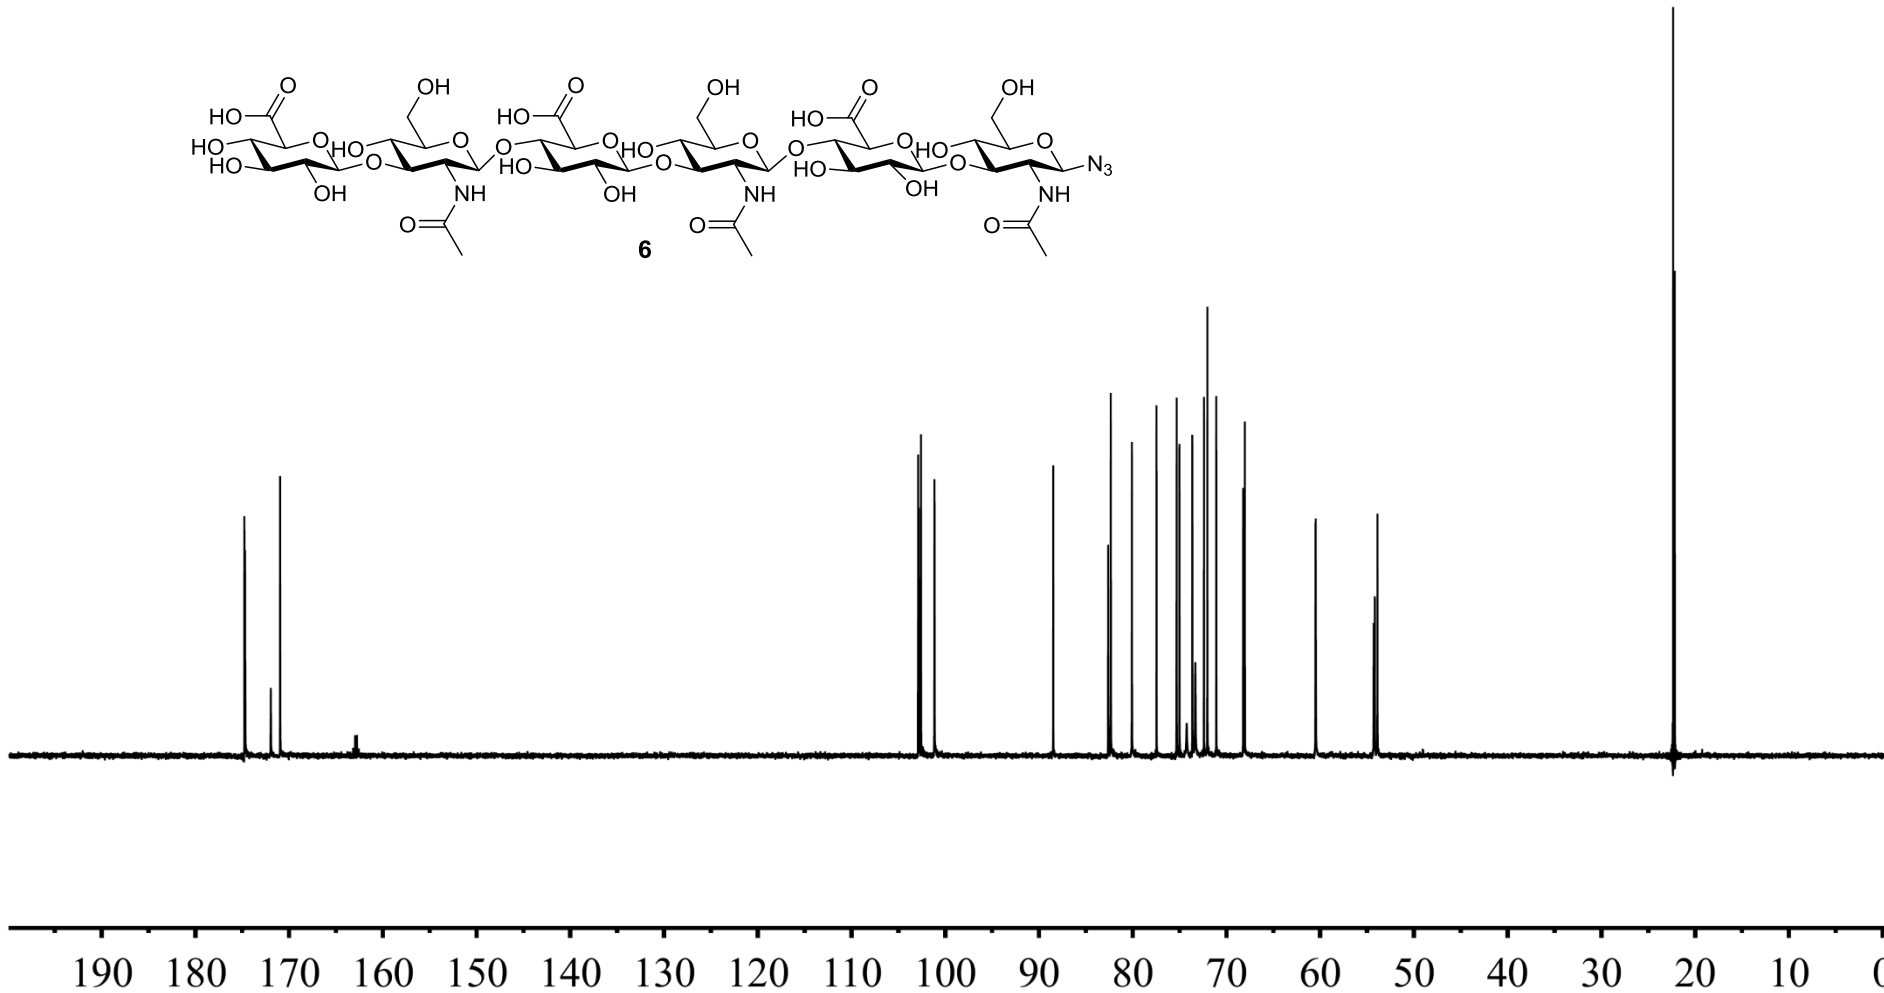

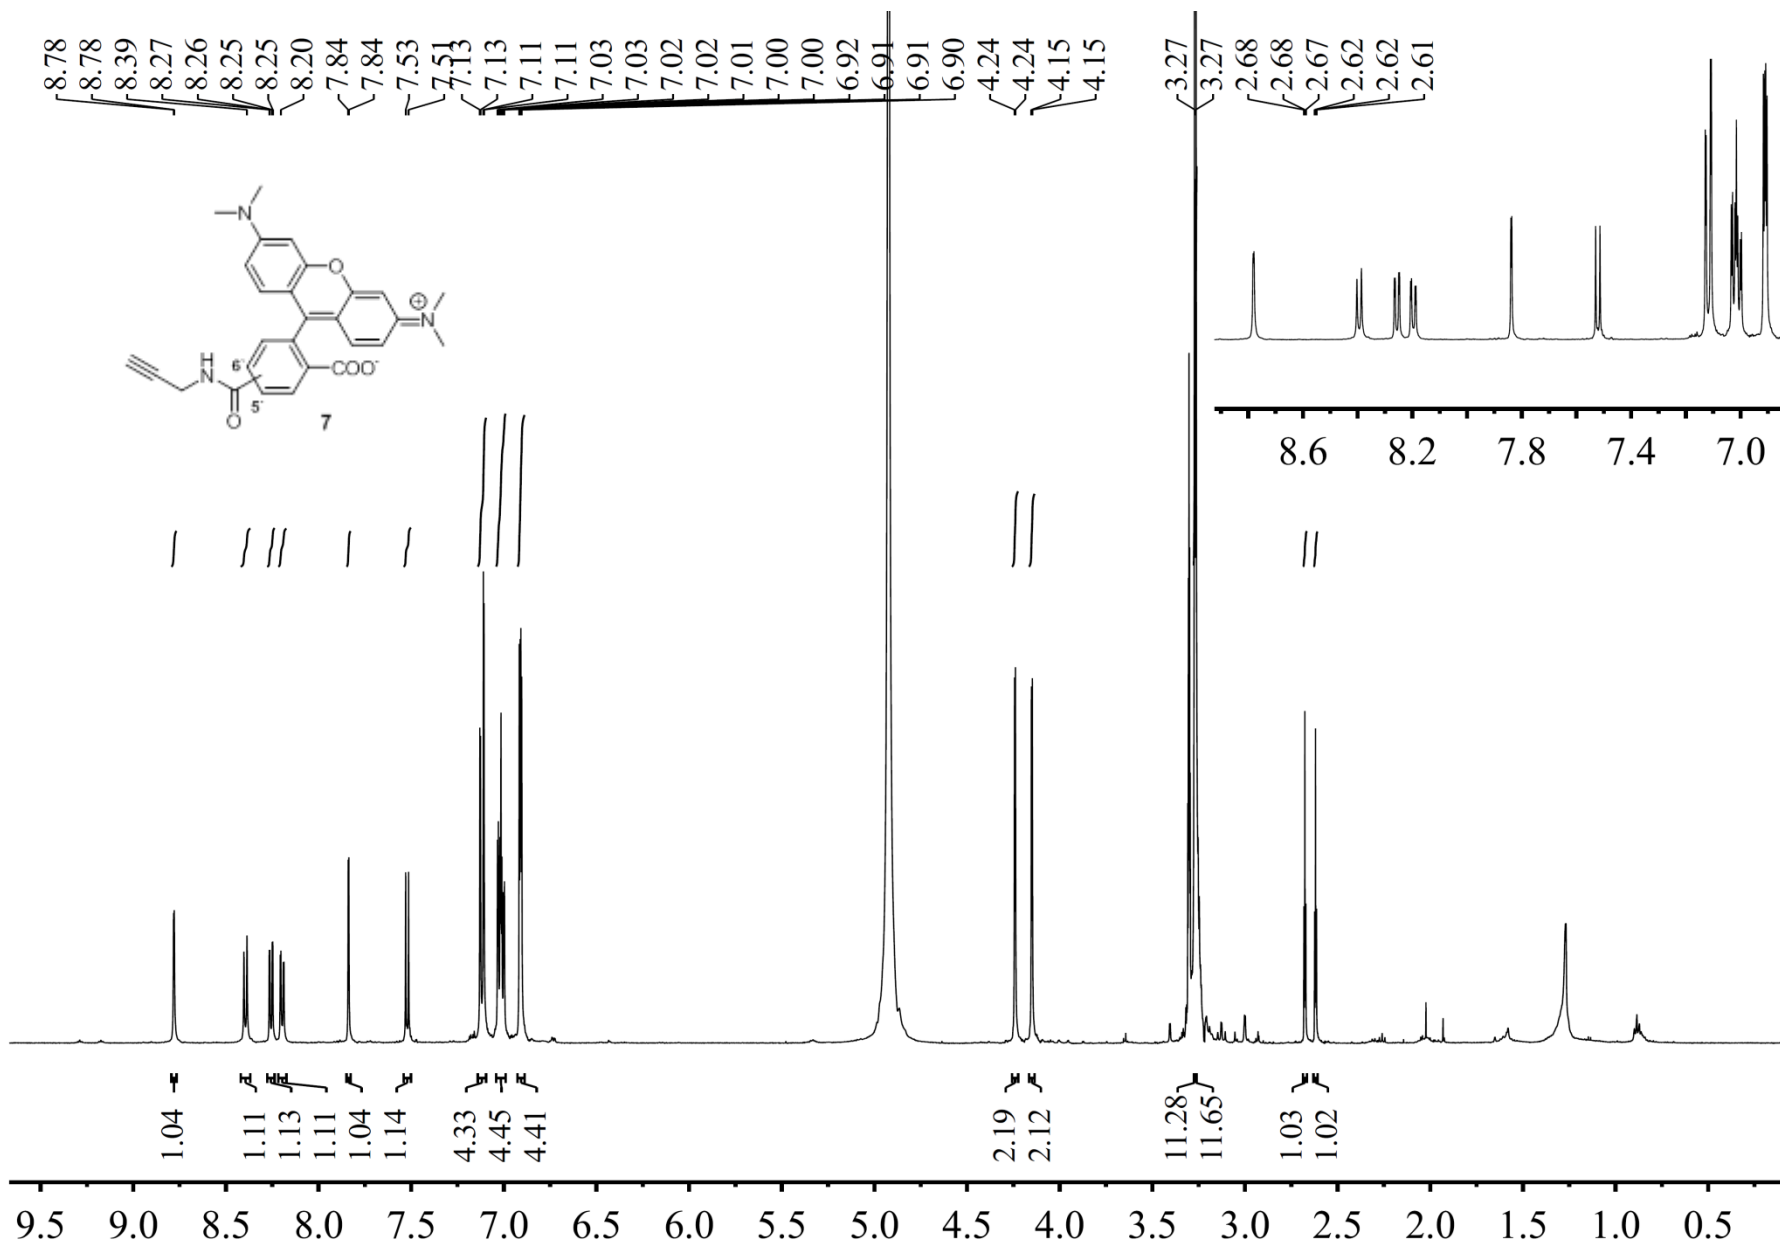

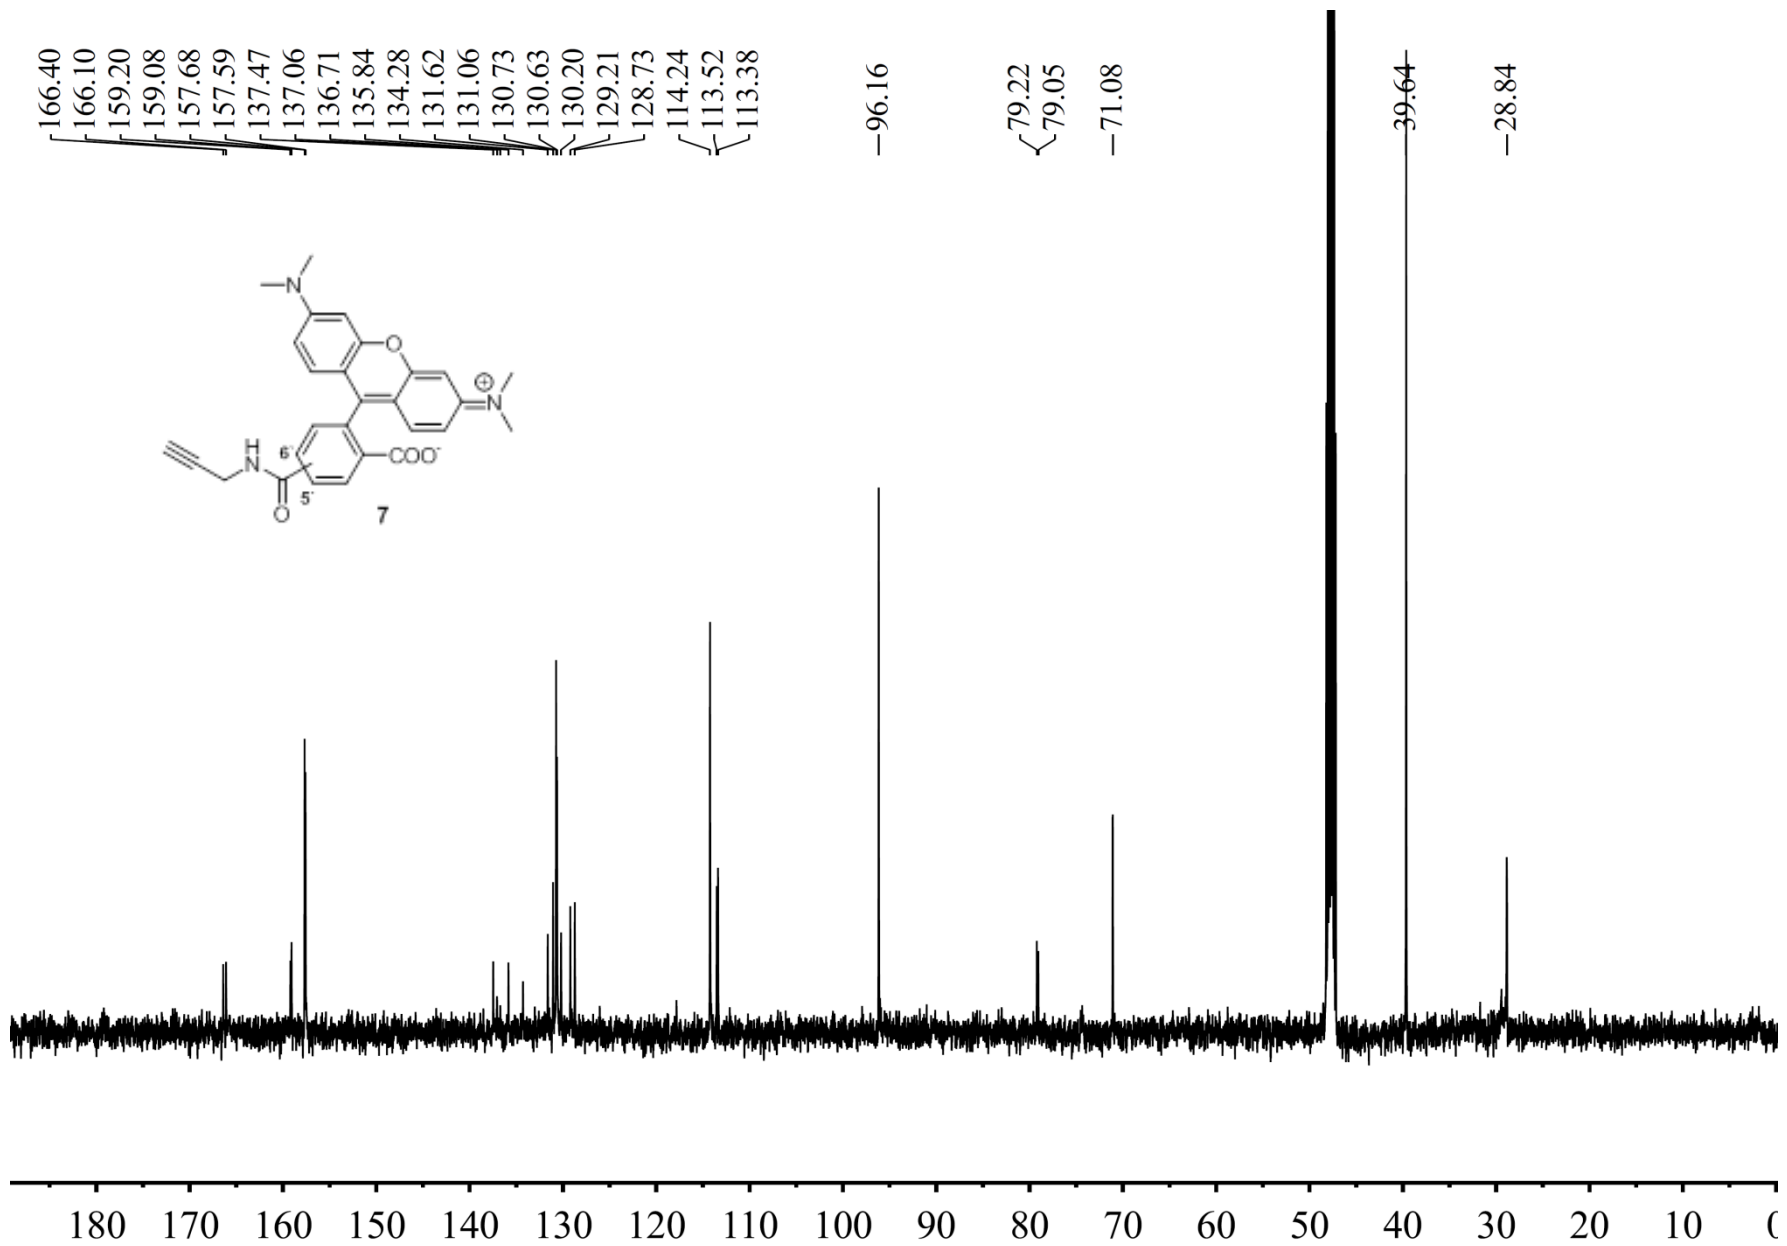

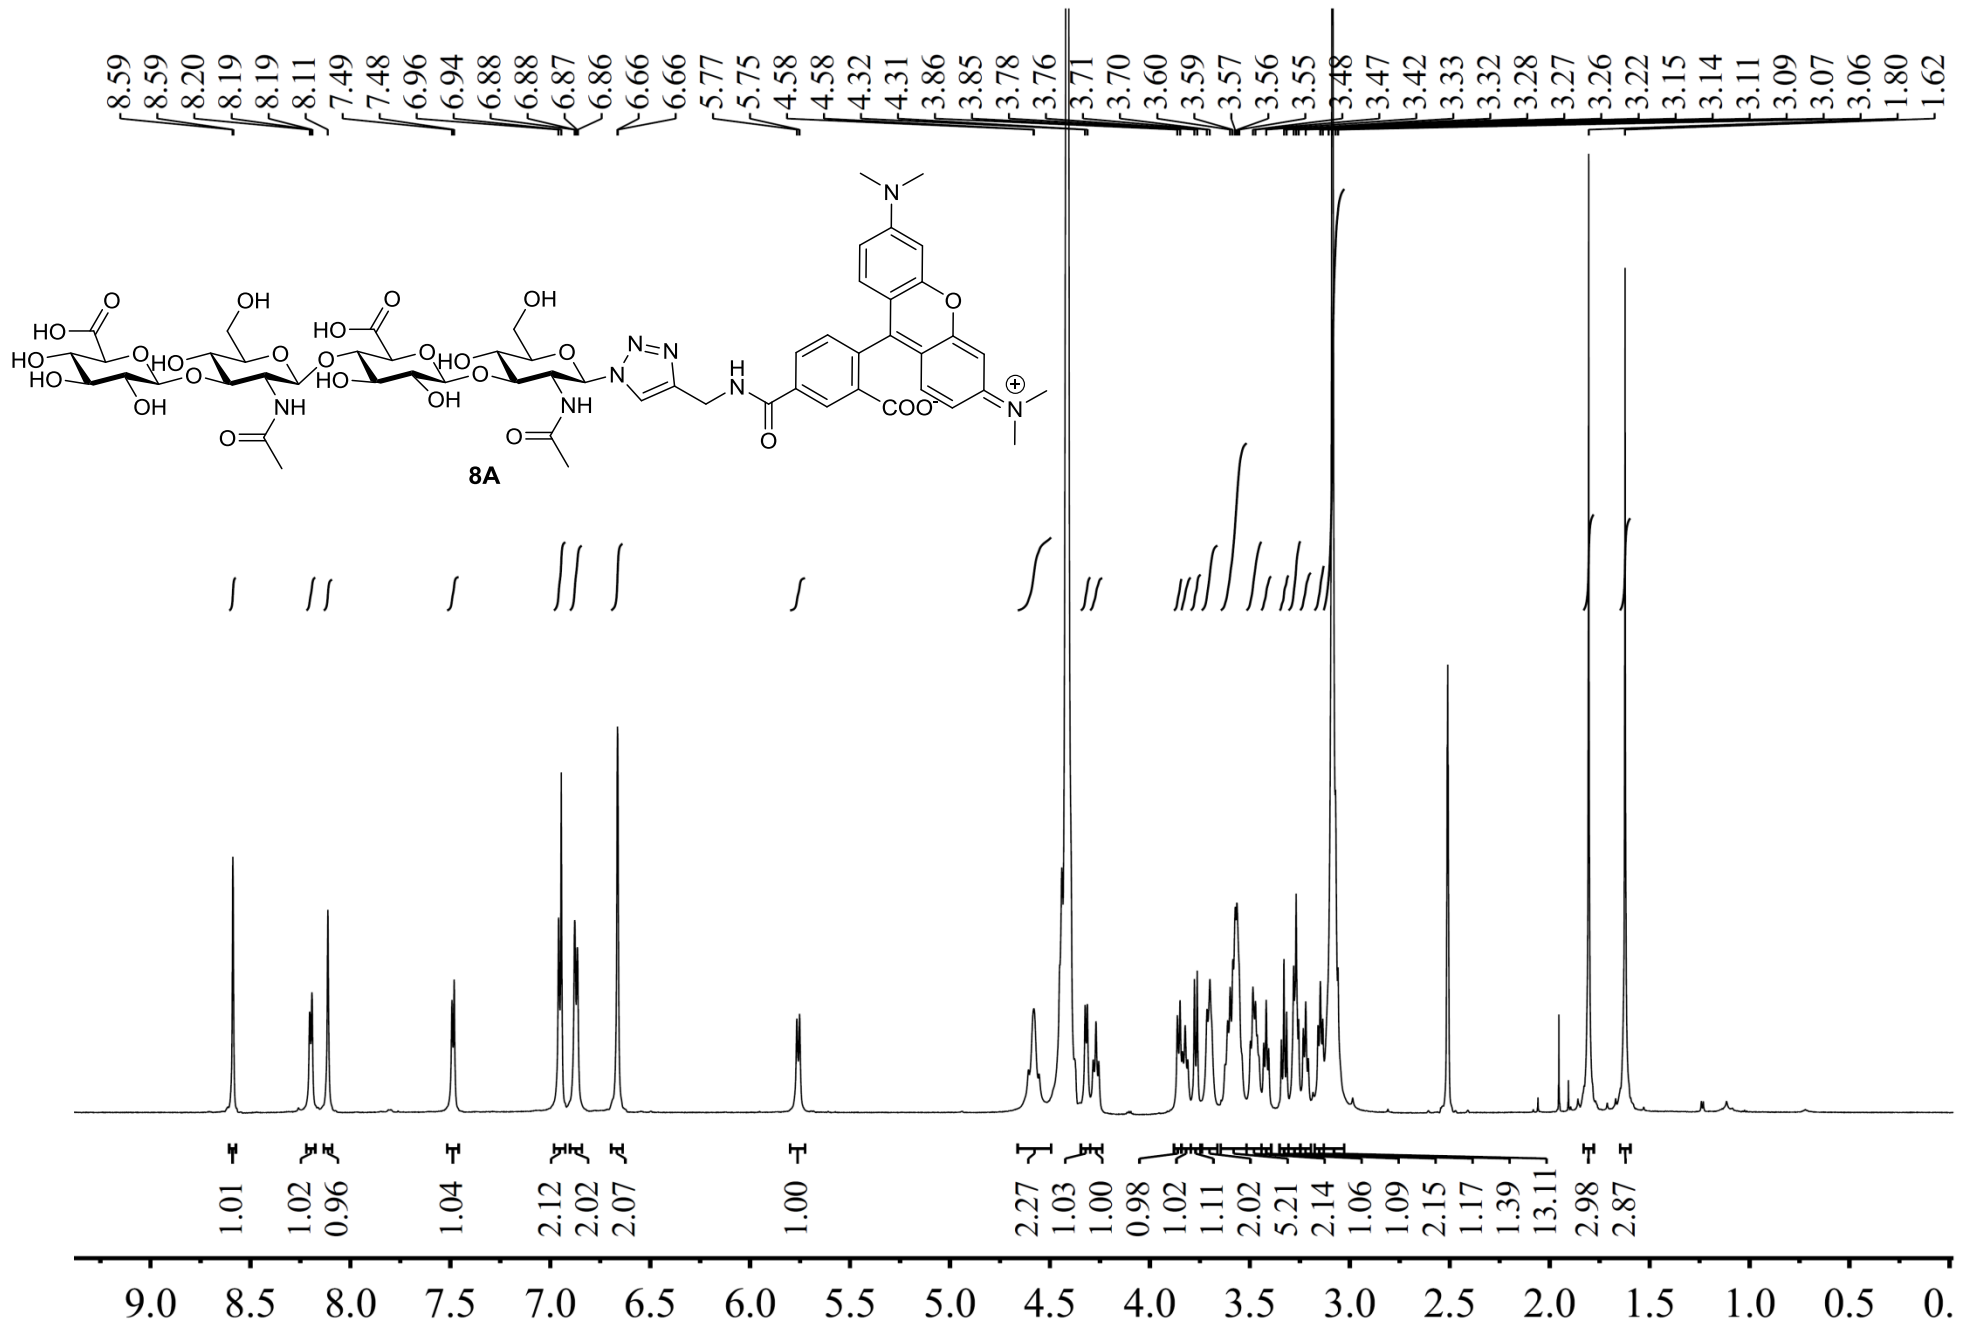



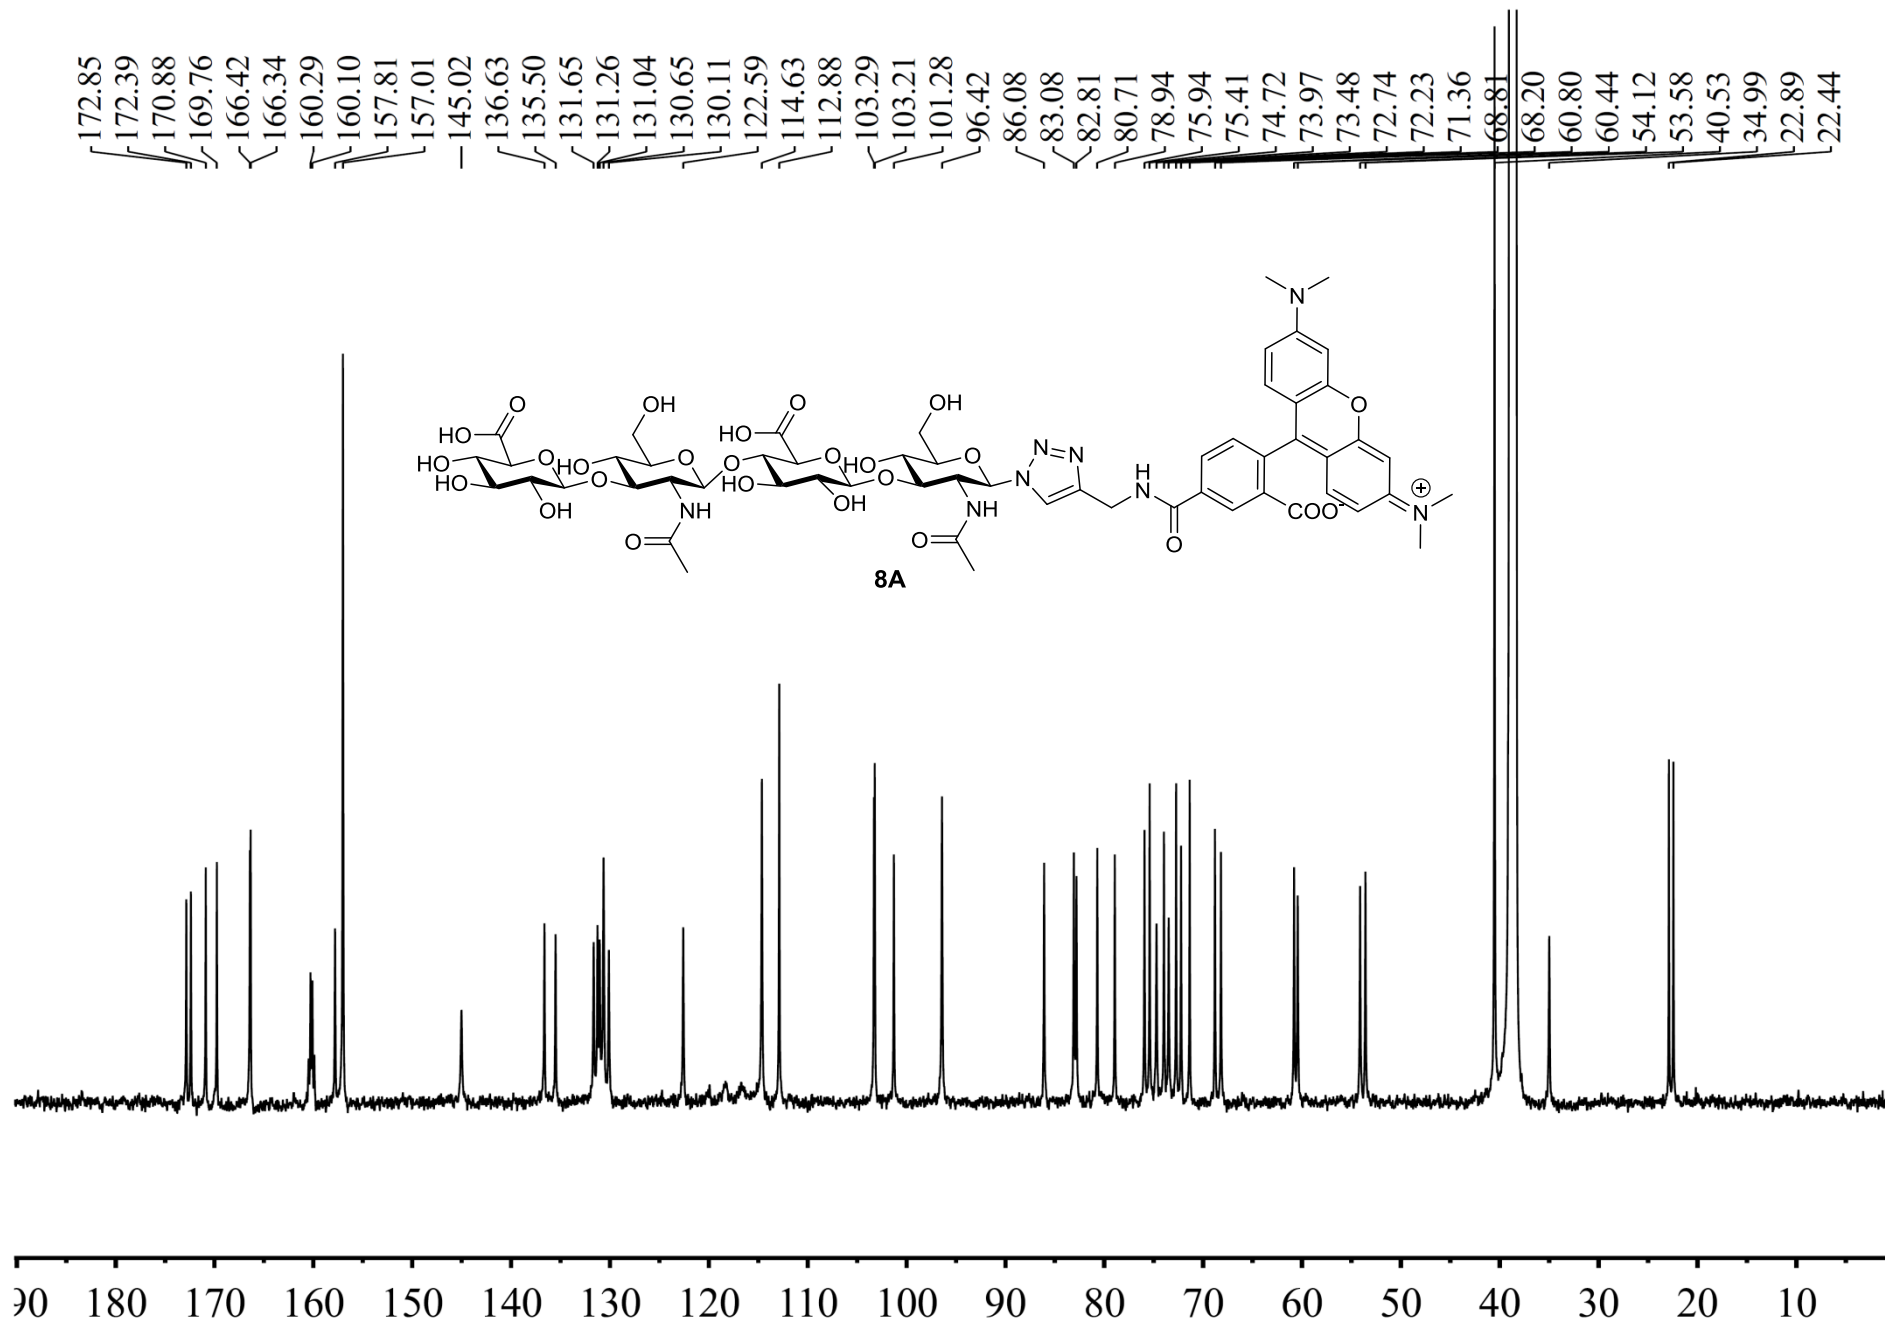

172.85  
172.39  
170.88  
169.76  
166.42  
166.34  
160.29  
160.10  
157.81  
157.01  
145.02  
136.63  
135.50  
131.65  
131.26  
131.04  
130.65  
130.11  
122.59  
114.63  
112.88  
103.29  
103.21  
101.28  
96.42  
86.08  
83.08  
82.81  
80.71  
78.94  
75.94  
75.41  
74.72  
73.97  
73.48  
72.74  
72.23  
71.36  
68.81  
68.20  
60.80  
60.44  
60.44  
54.12  
53.58  
40.53  
34.99  
22.89  
22.44

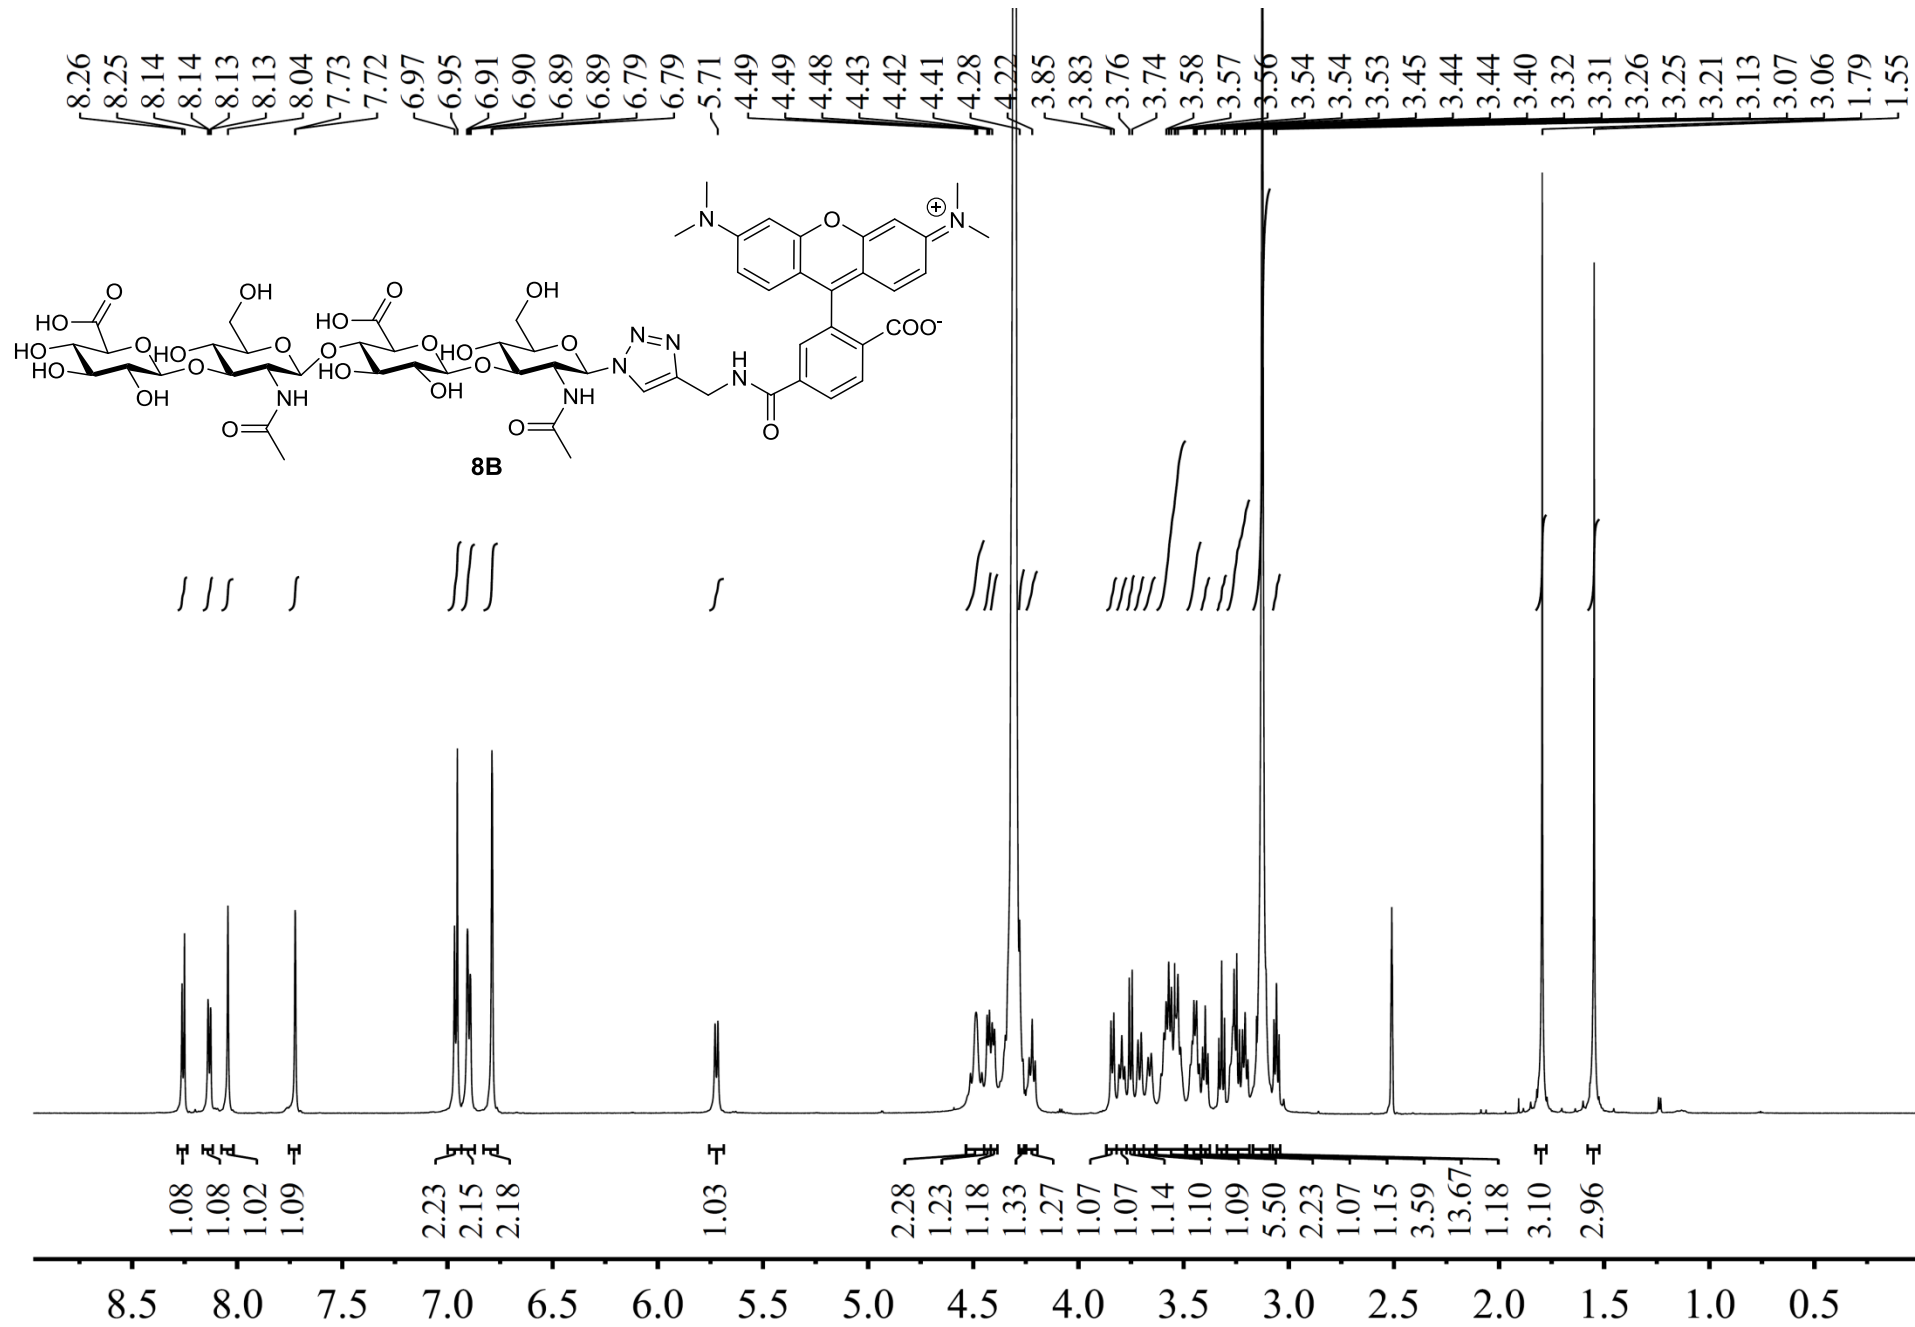

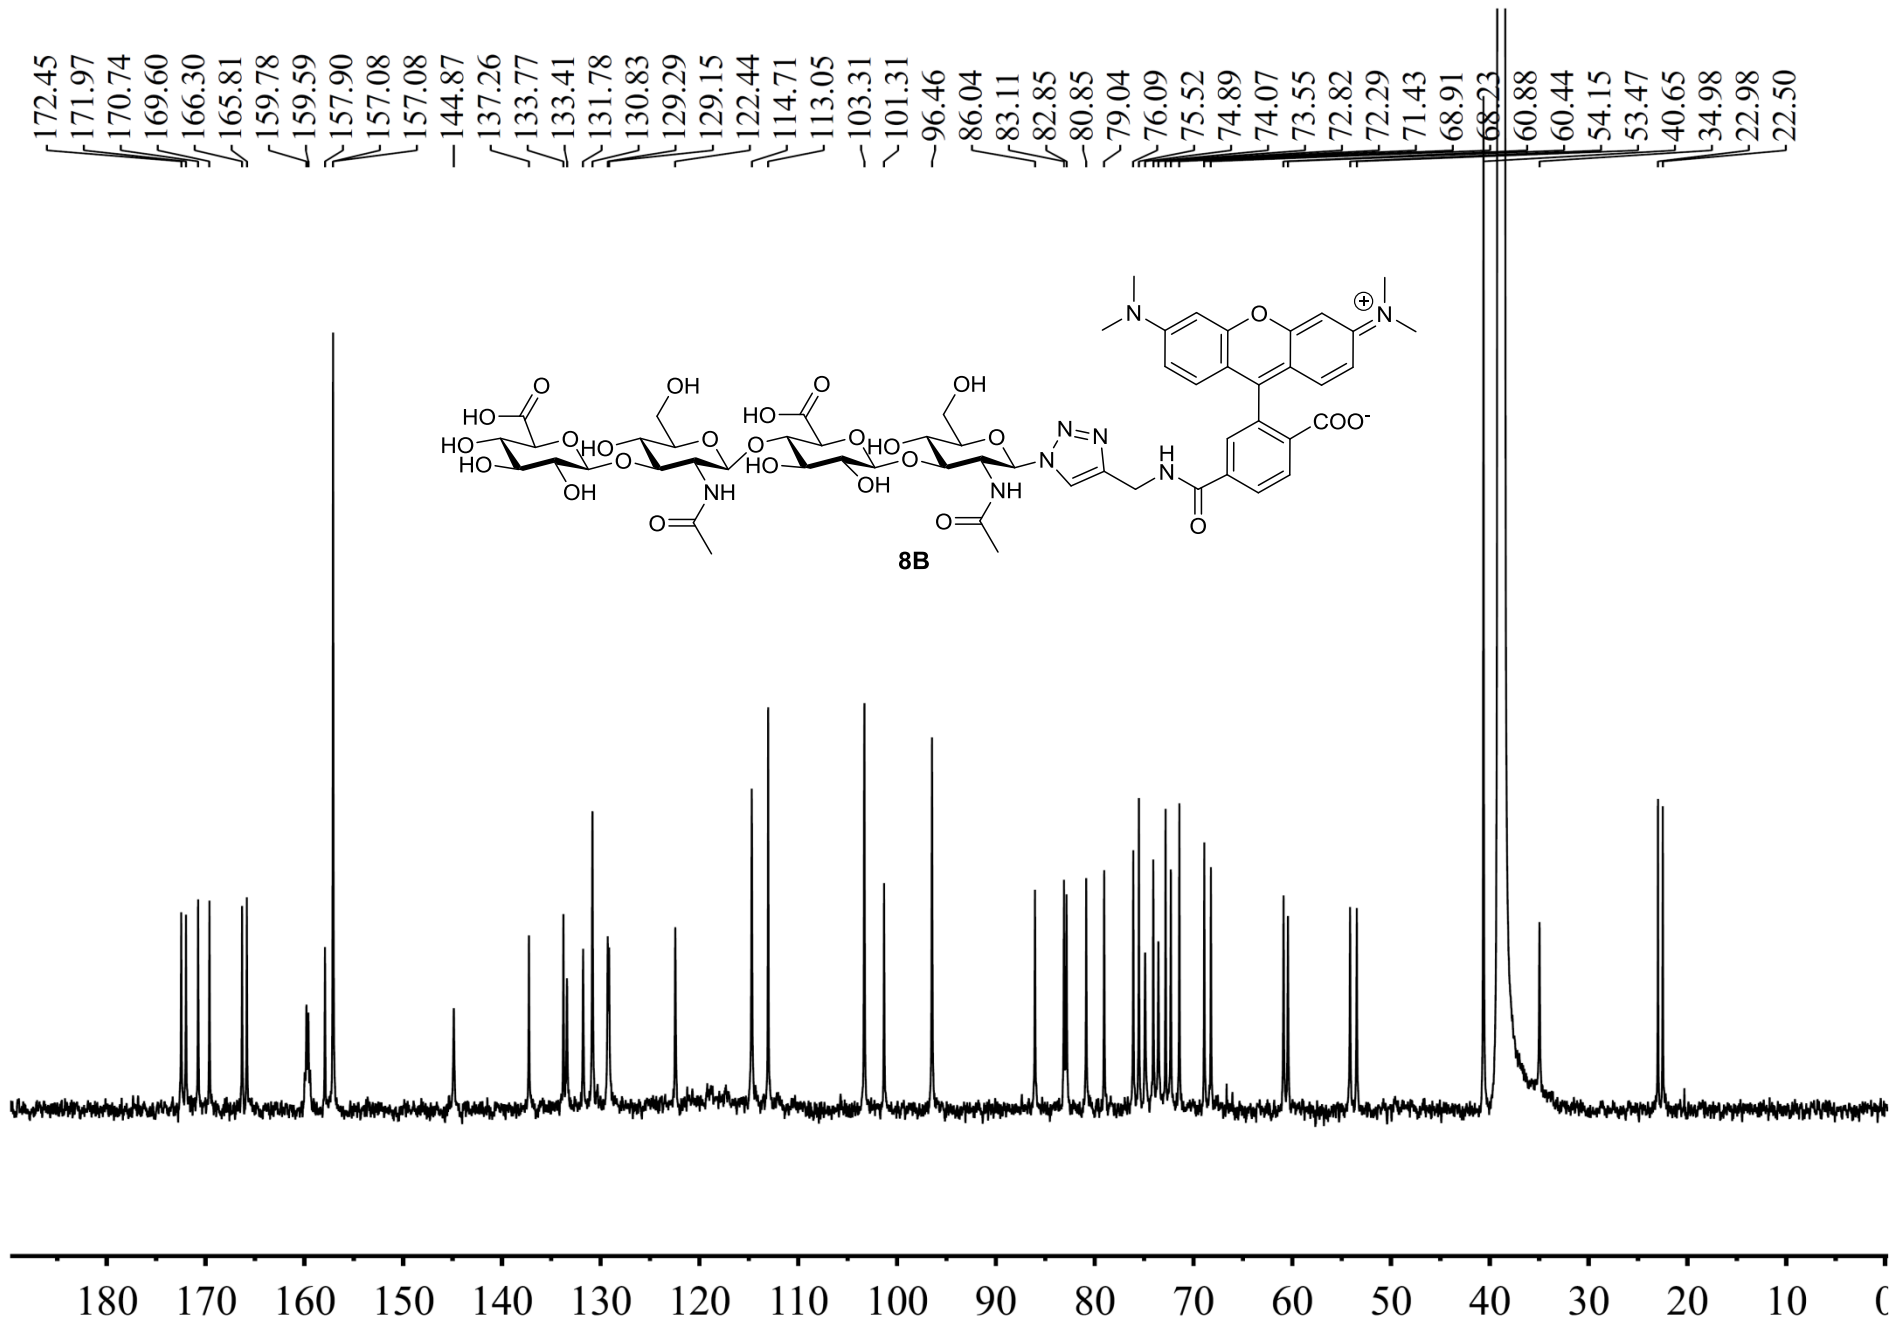

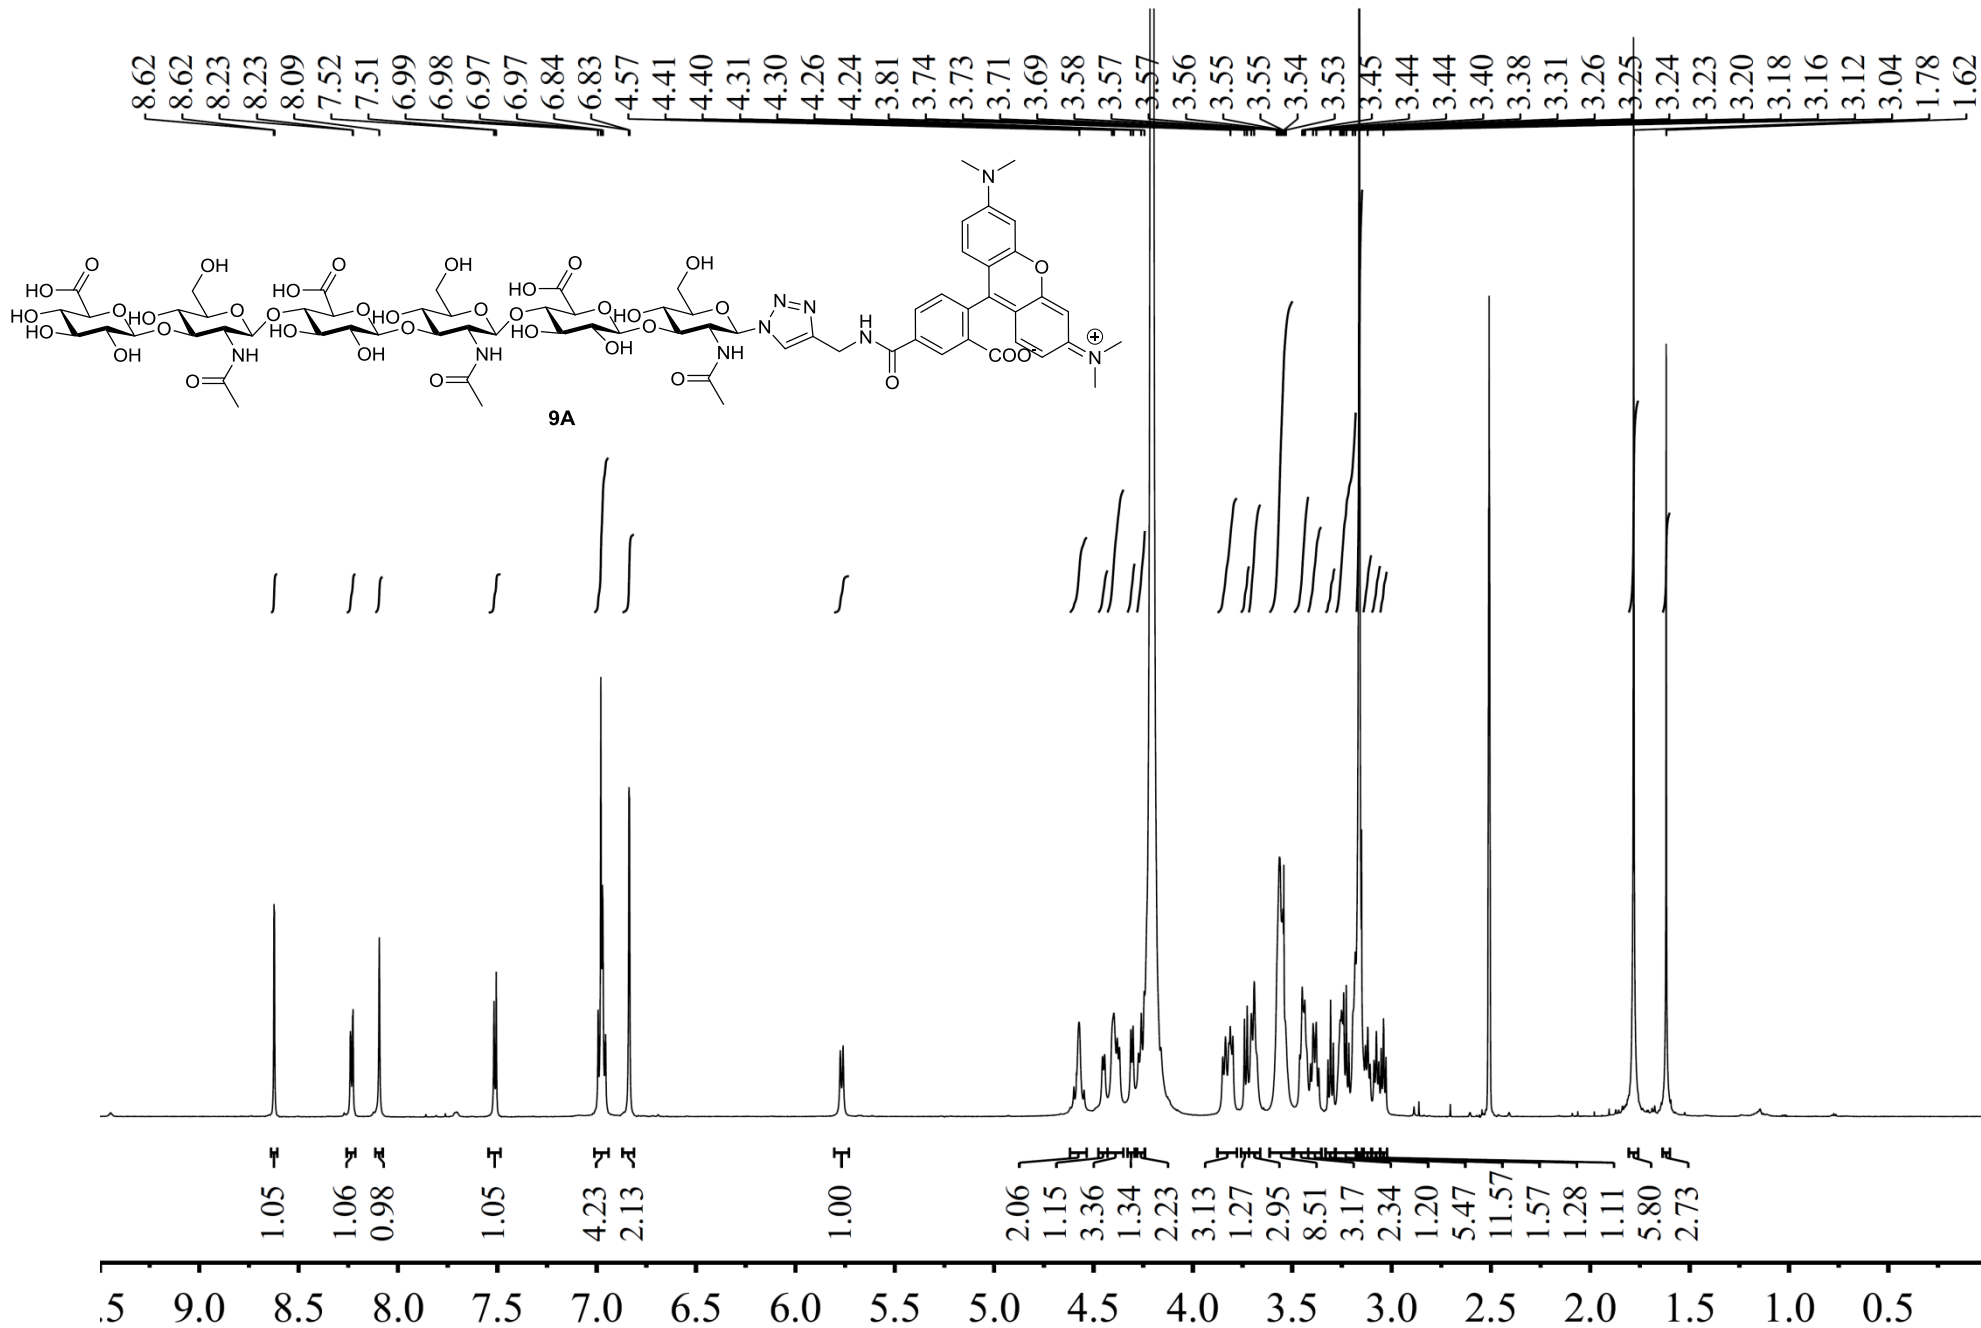

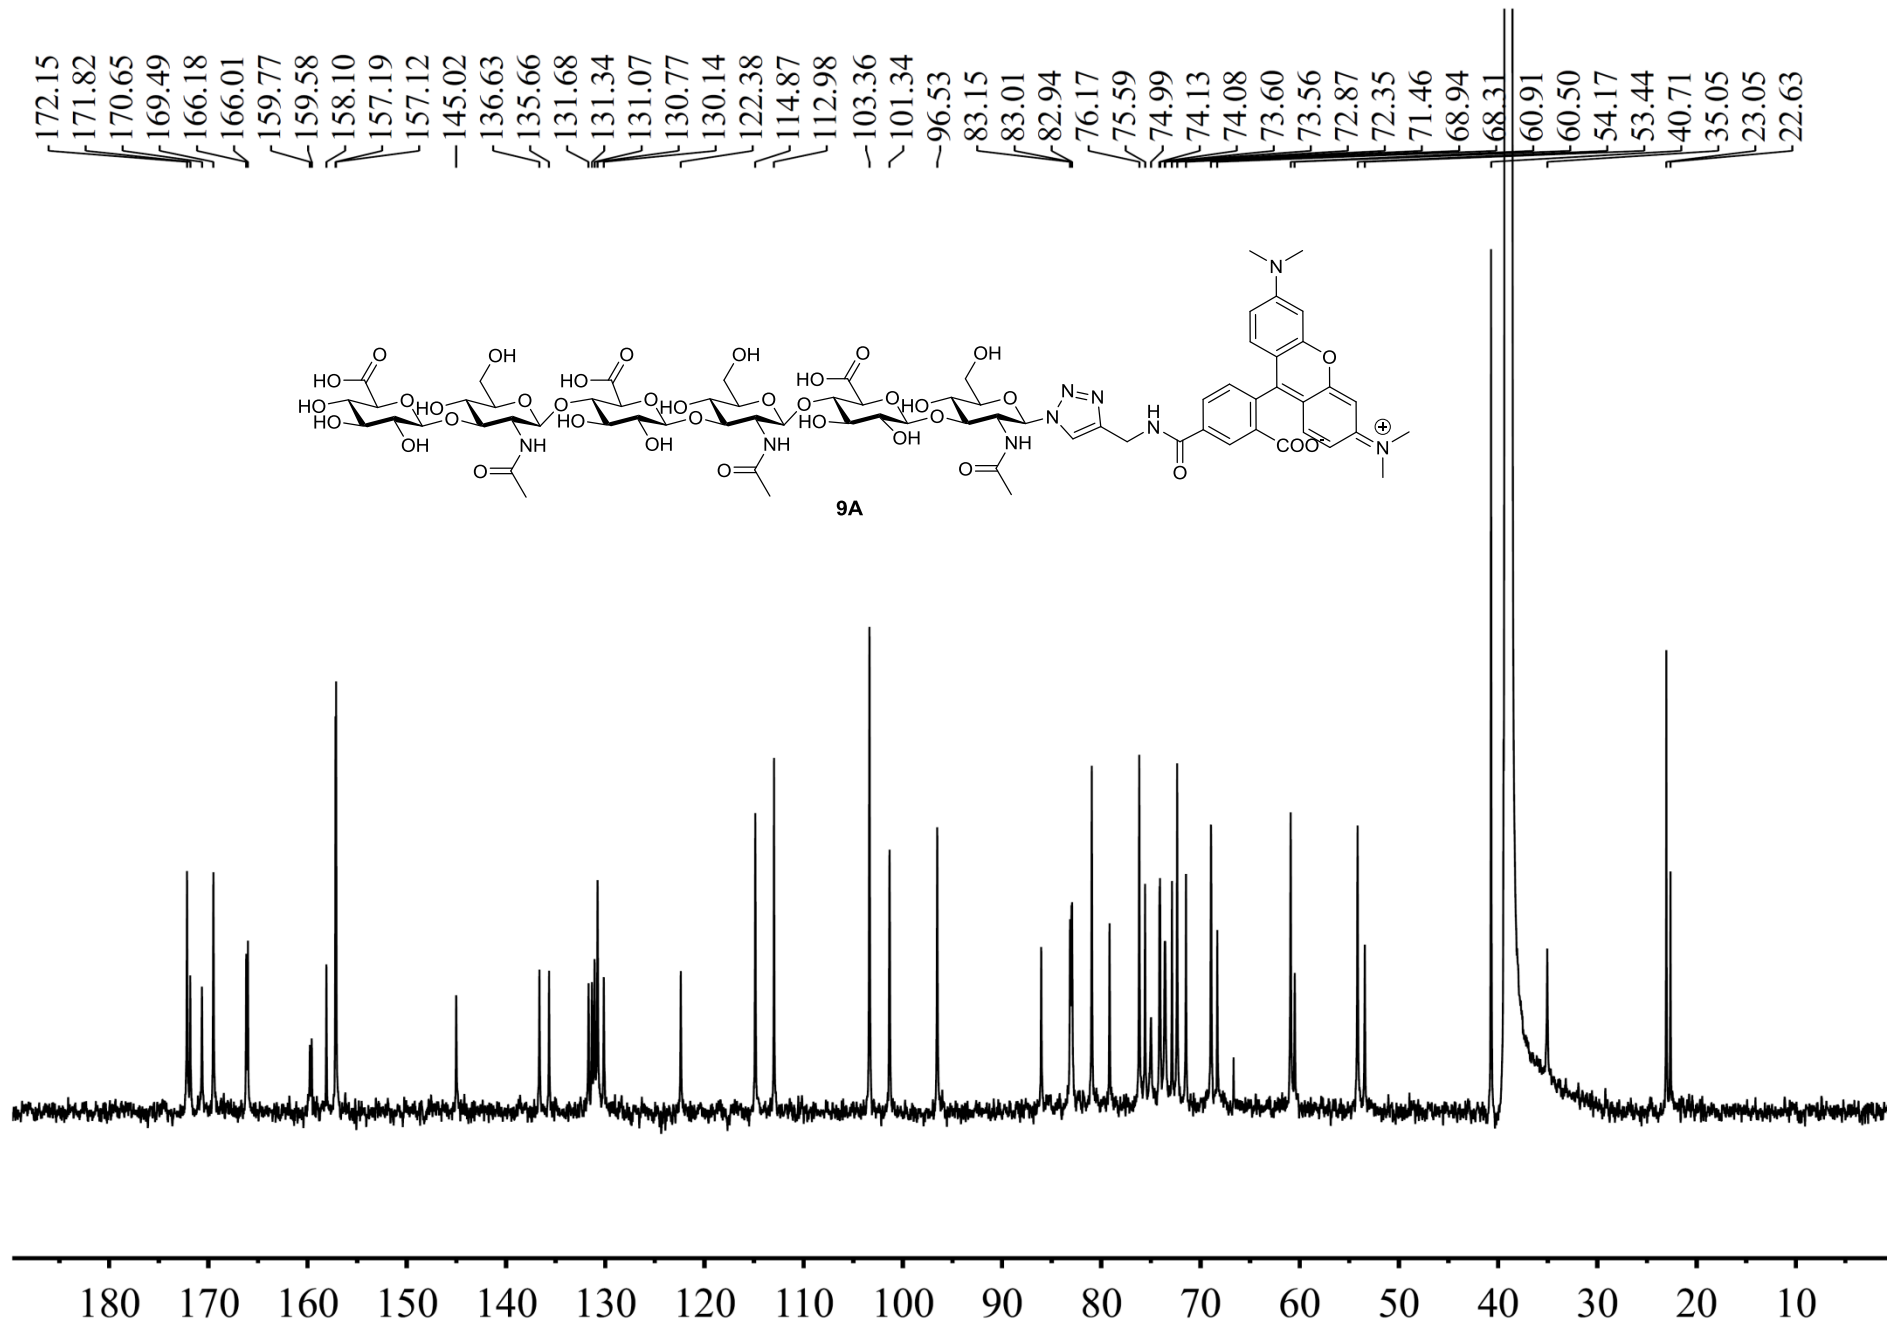

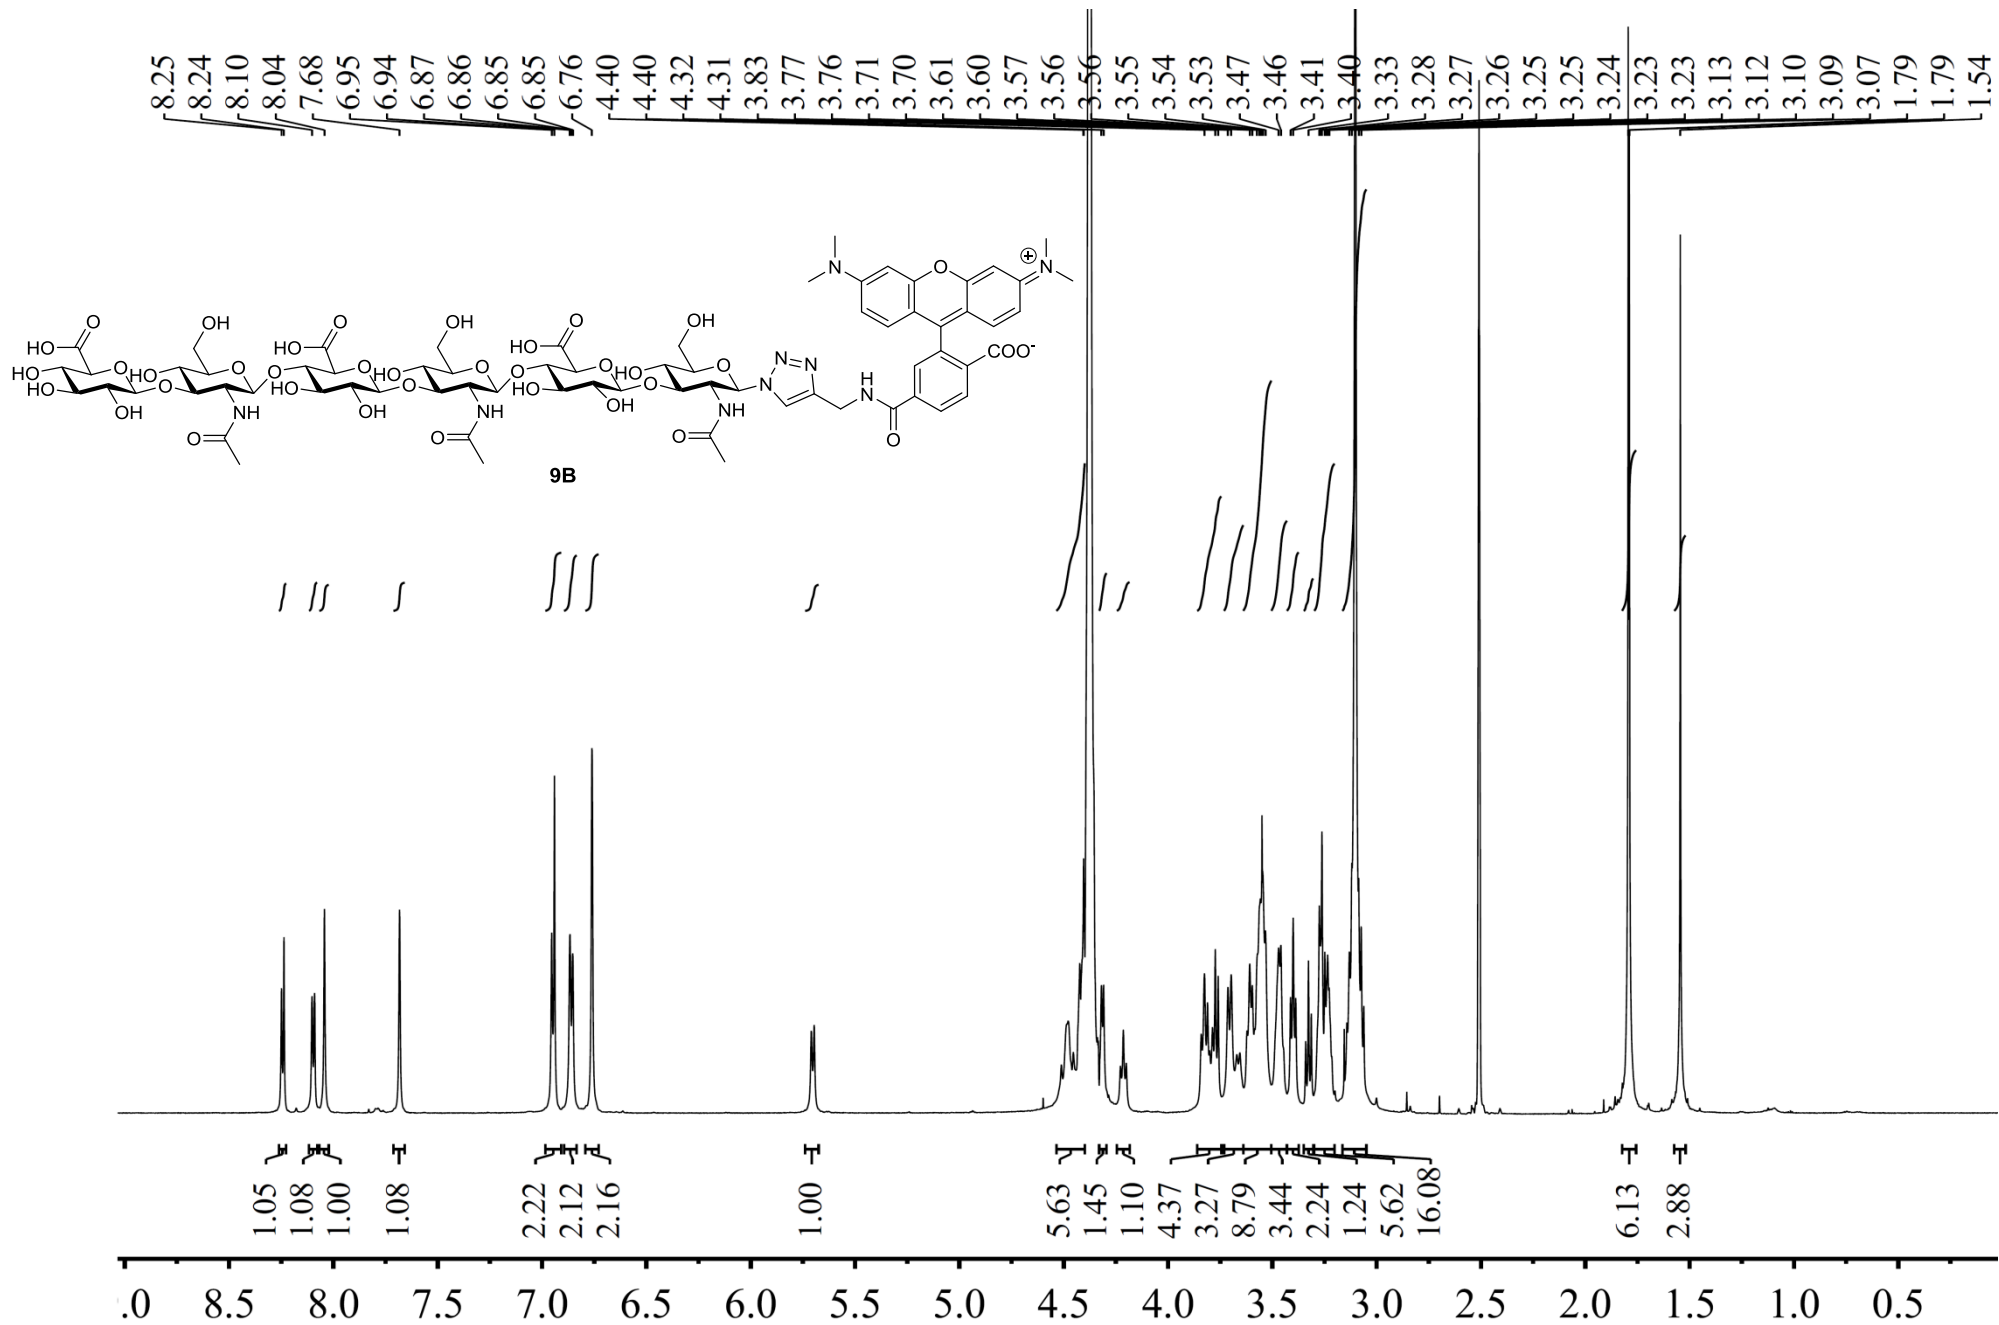

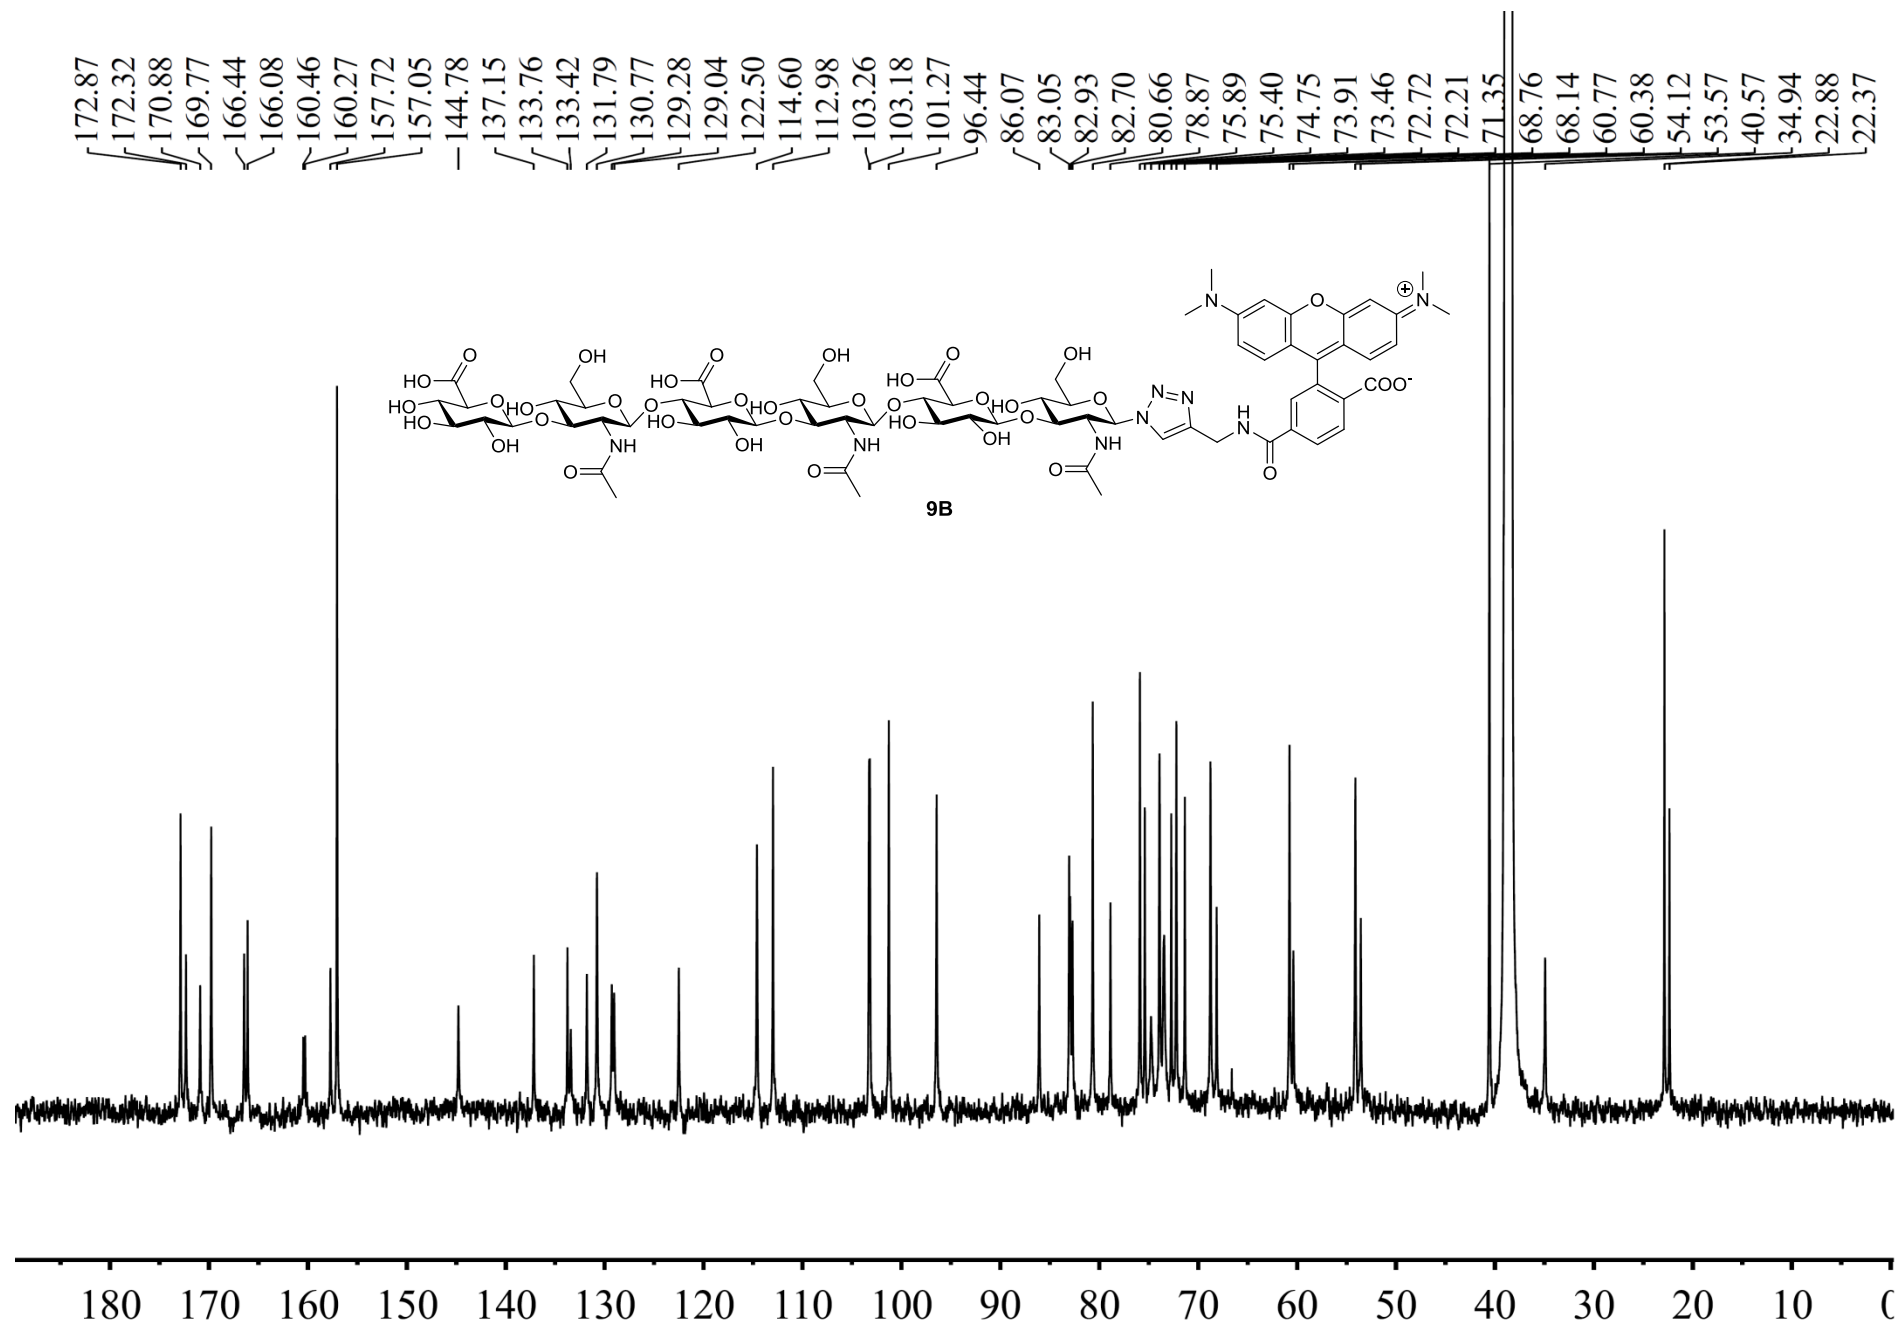

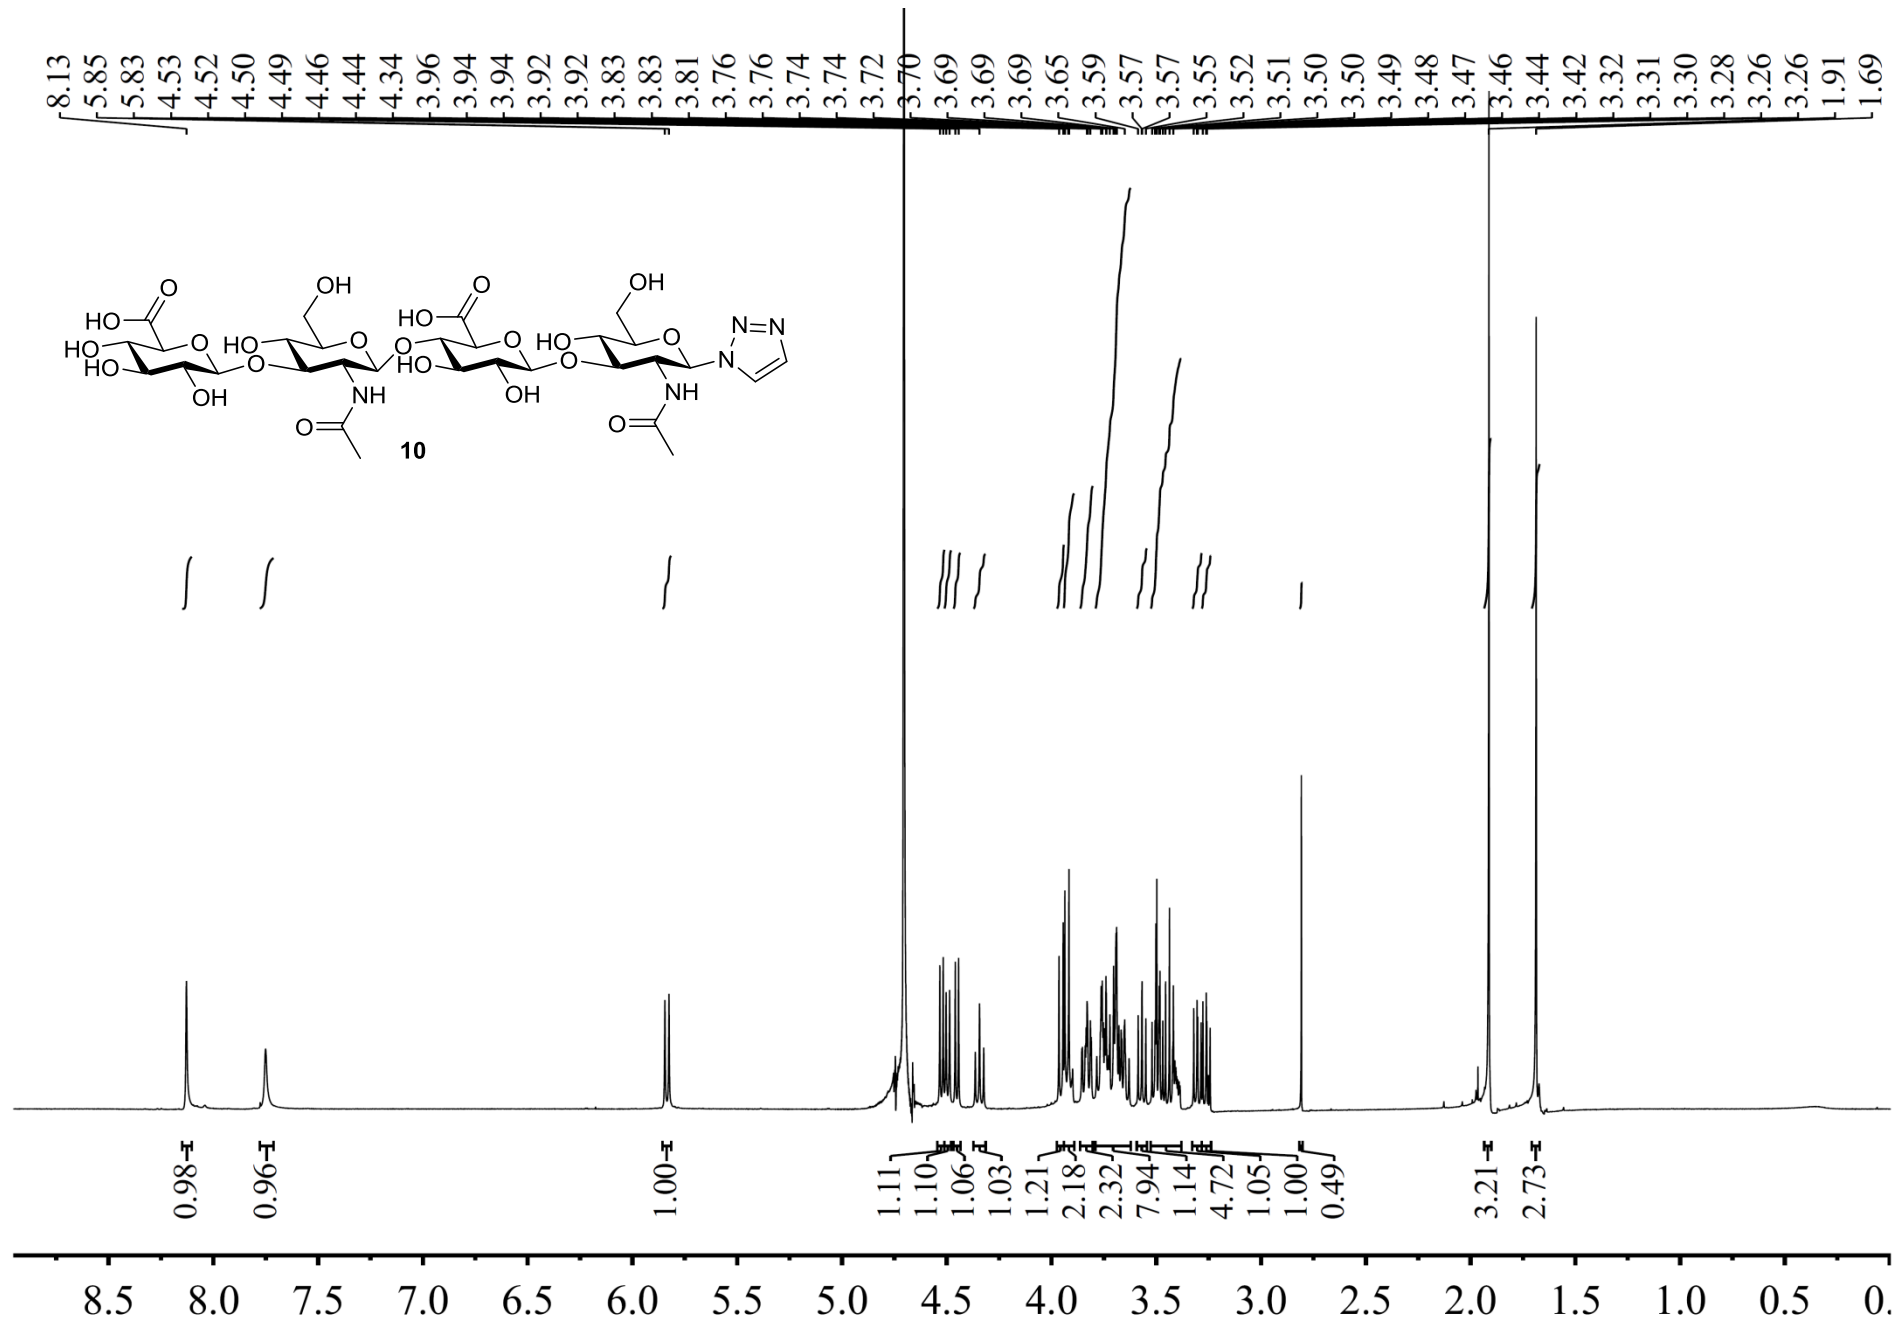



174.09  
 171.98  
 170.98  
 124.84  
 124.54  
 102.91  
 102.79  
 102.57  
 101.19  
 101.11  
 86.06  
 86.01  
 82.66  
 82.57  
 82.54  
 82.20  
 81.80  
 80.22  
 79.94  
 78.62  
 78.41  
 75.38  
 75.23  
 75.04  
 74.94  
 74.31  
 73.90  
 73.62  
 73.53  
 73.11  
 72.49  
 72.29  
 72.14  
 71.94  
 71.06  
 68.21  
 67.97  
 67.74  
 60.71  
 60.53  
 60.41  
 60.18  
 54.31  
 54.25  
 54.12  
 54.02  
 22.47  
 22.21  
 21.80  
 21.47

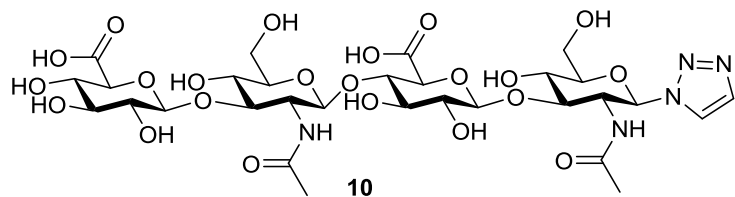

10

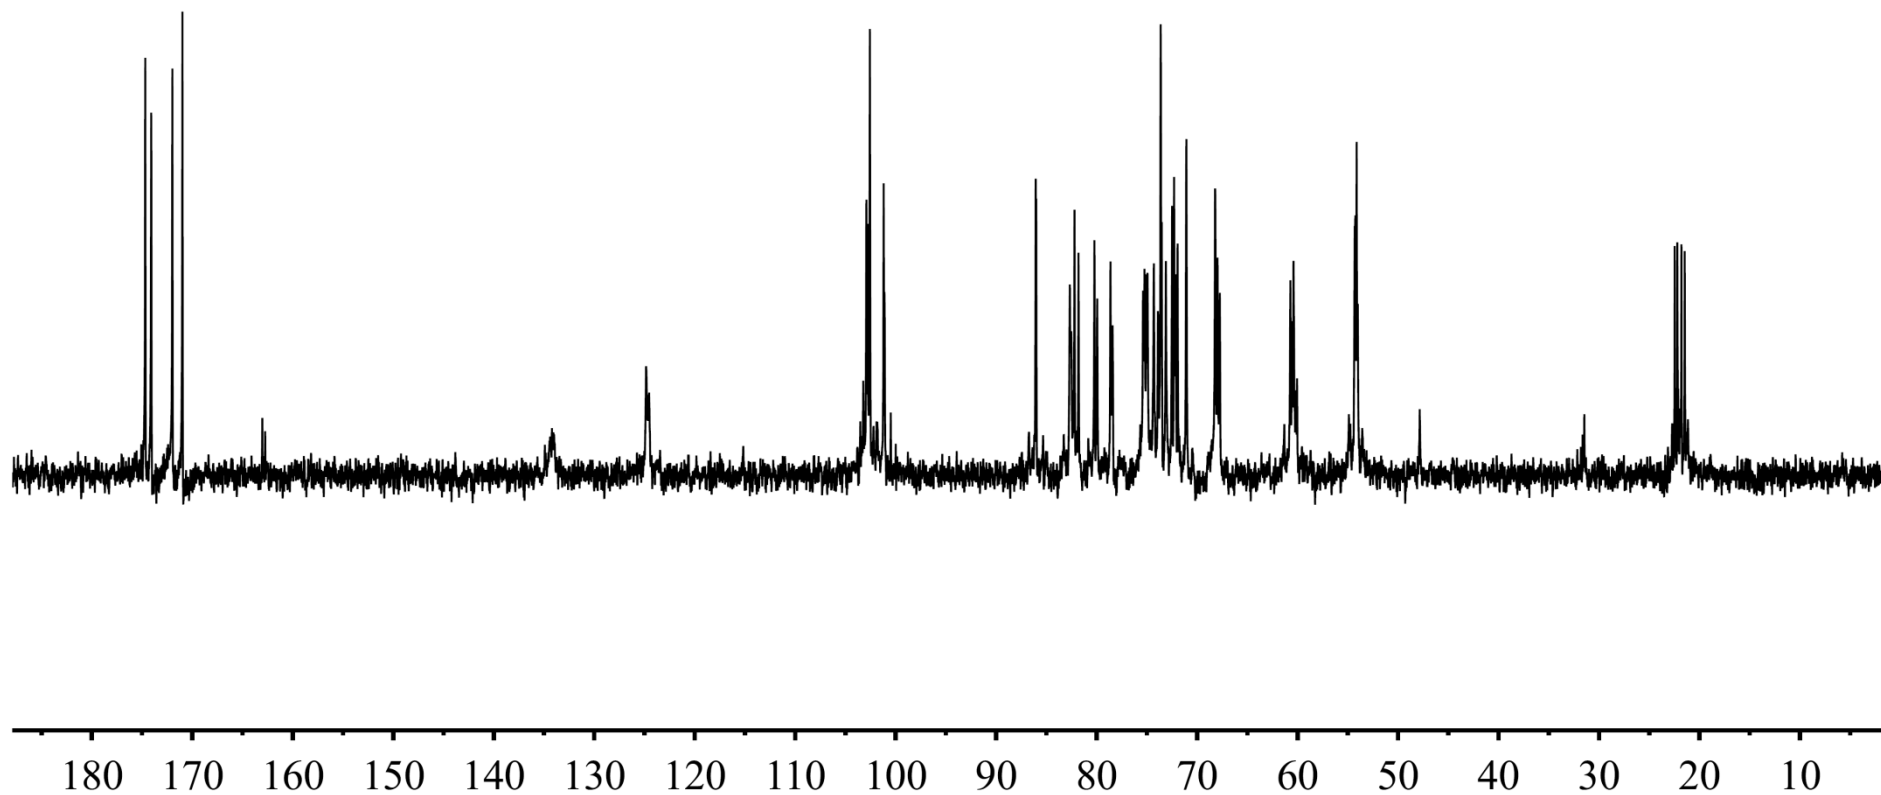

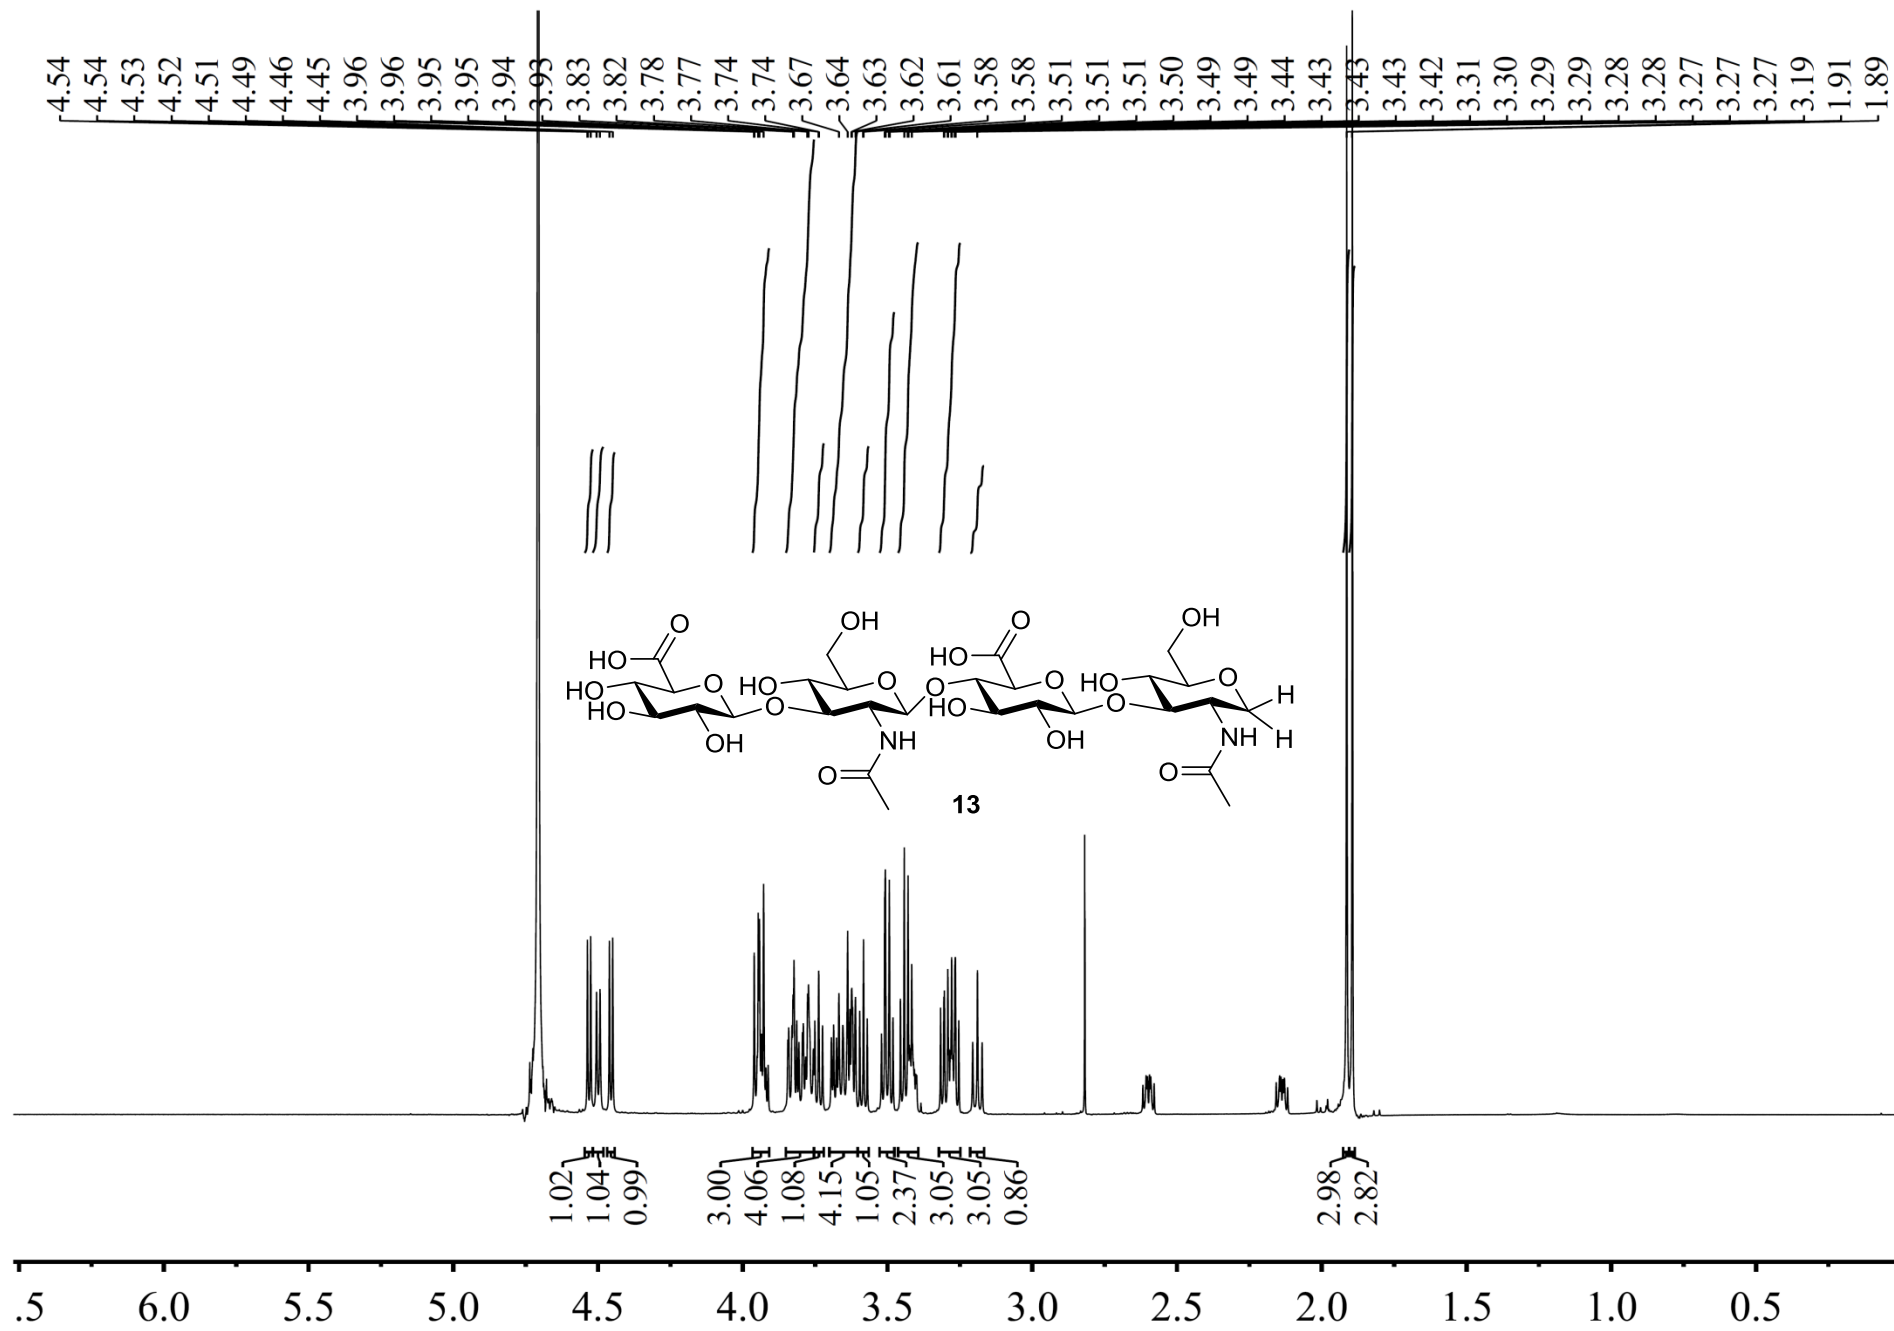

176.03  
175.95  
174.67  
174.46  
171.85  
170.88

102.56  
101.15  
83.78  
82.60  
80.08  
75.30  
75.00  
74.27  
73.66  
73.31  
72.39  
72.10  
71.06  
68.44  
68.20  
67.06  
60.83  
60.46  
54.16  
49.93  
22.33  
22.03

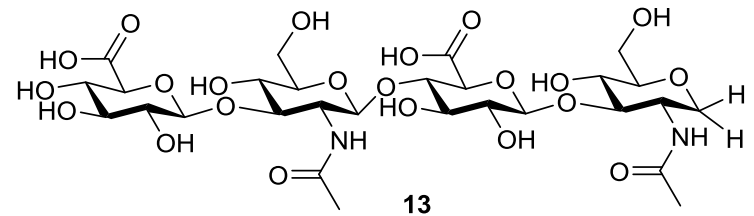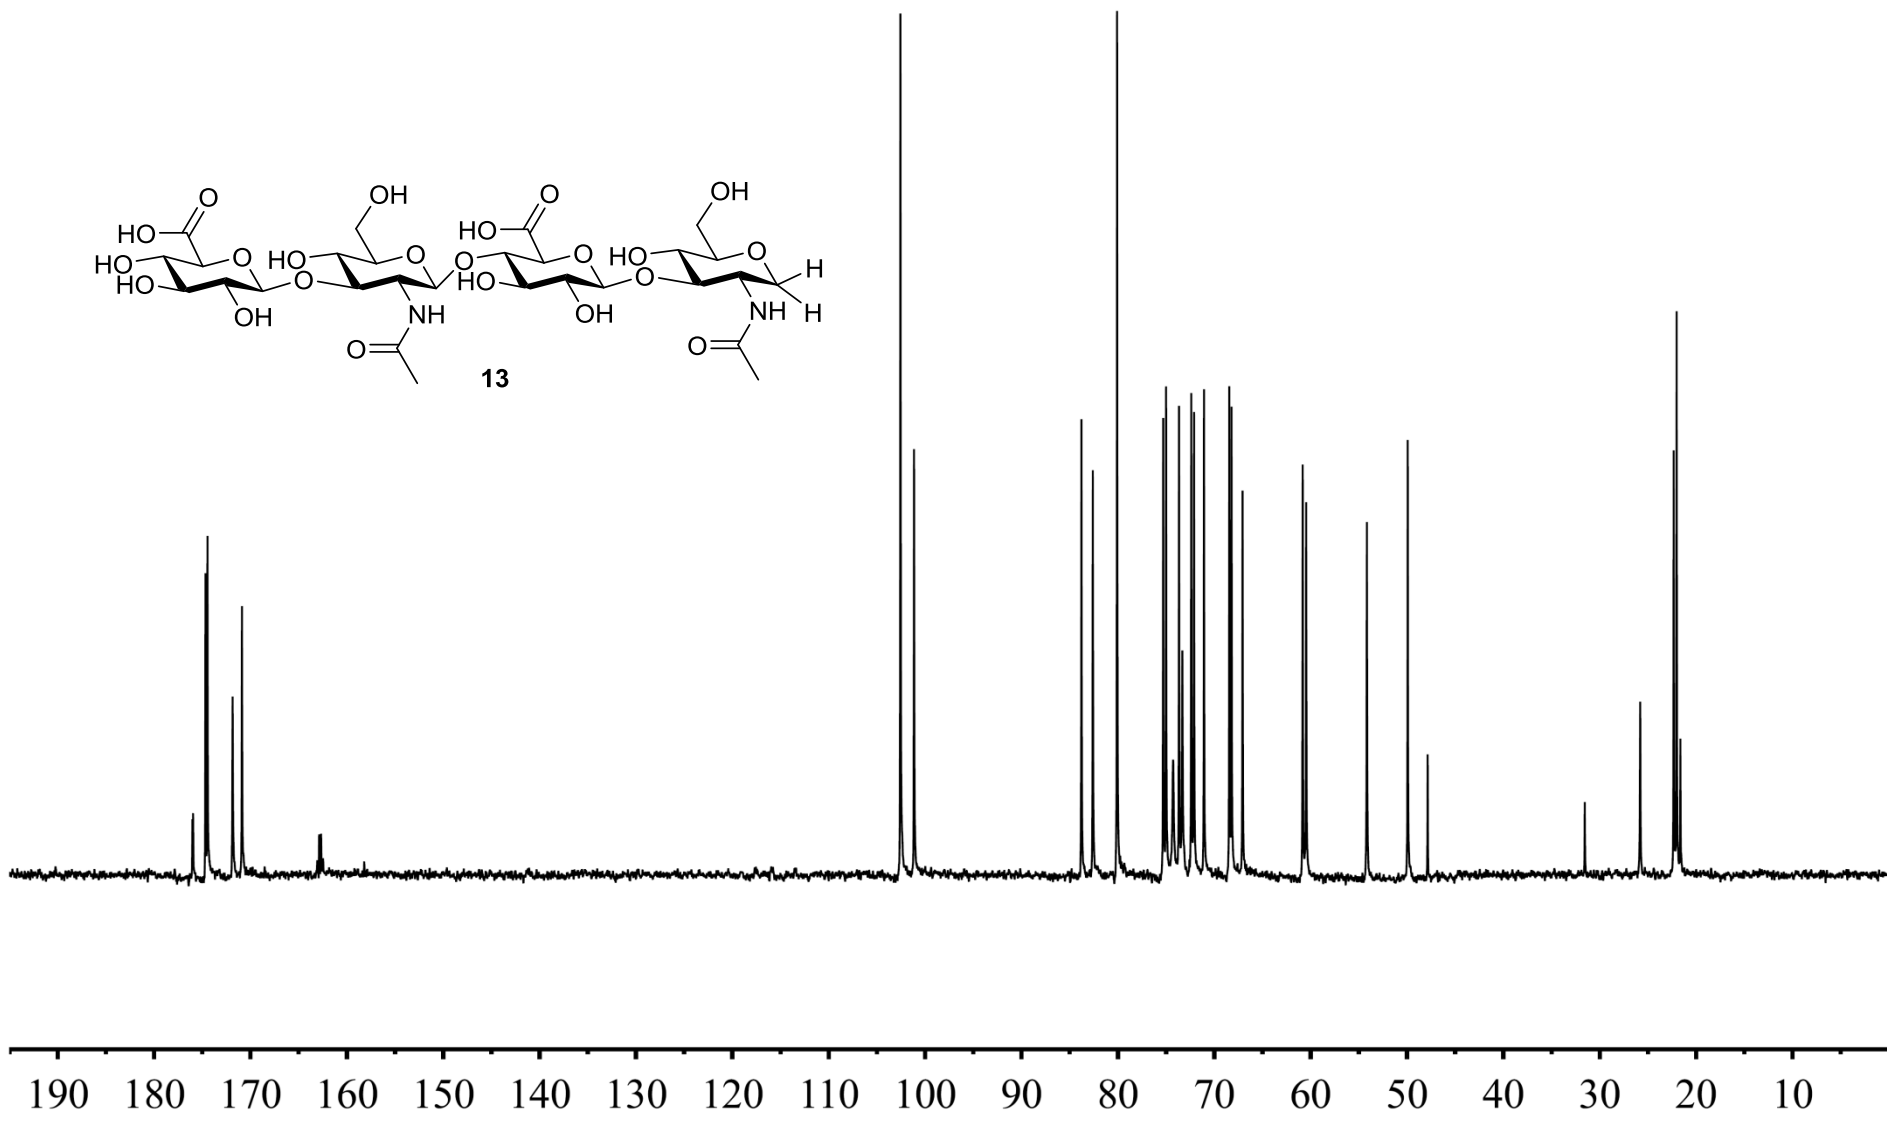

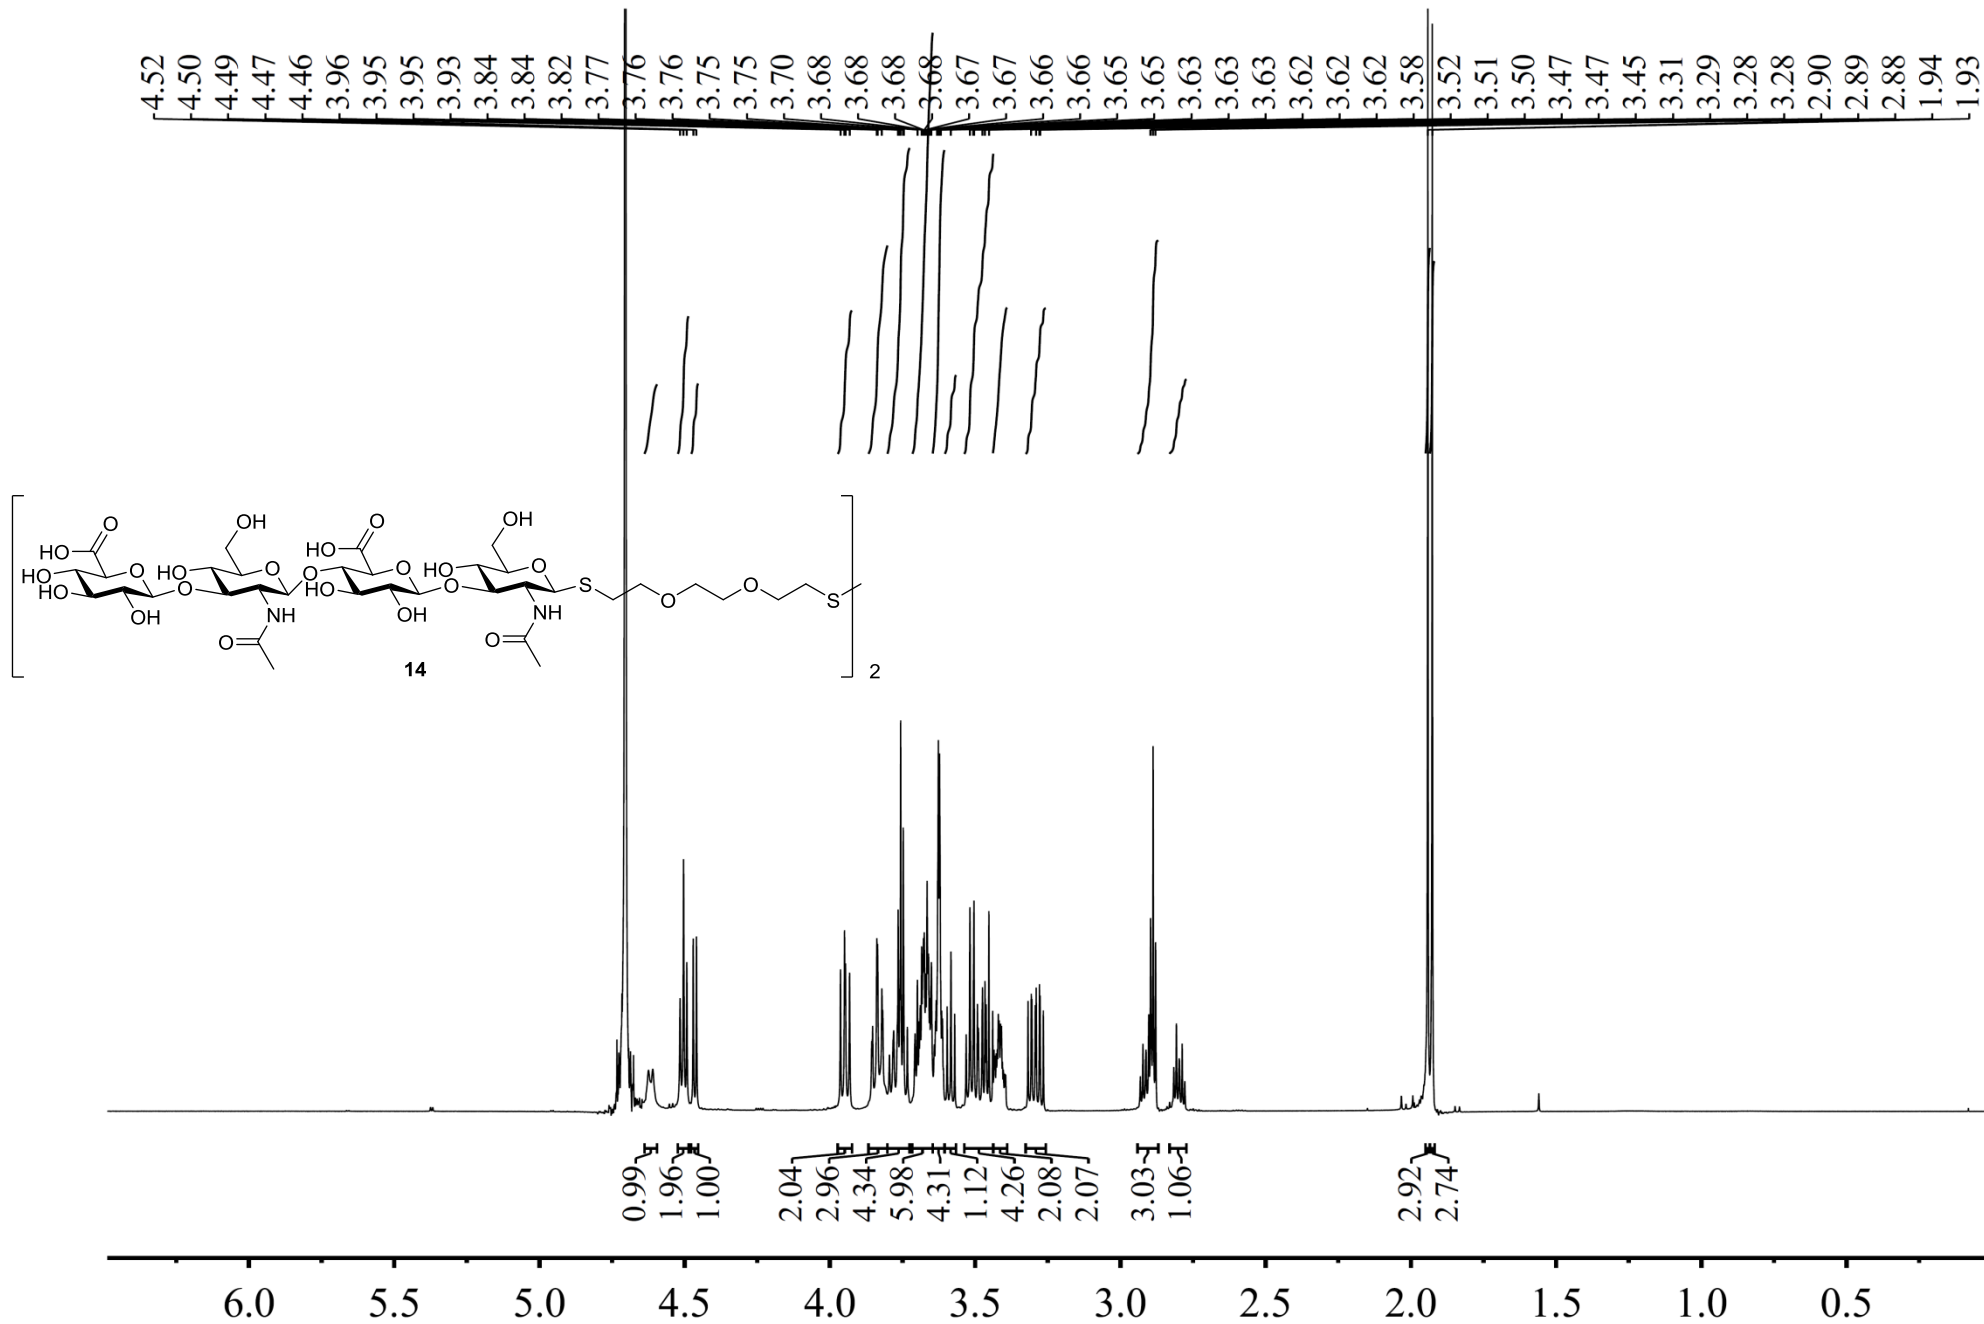

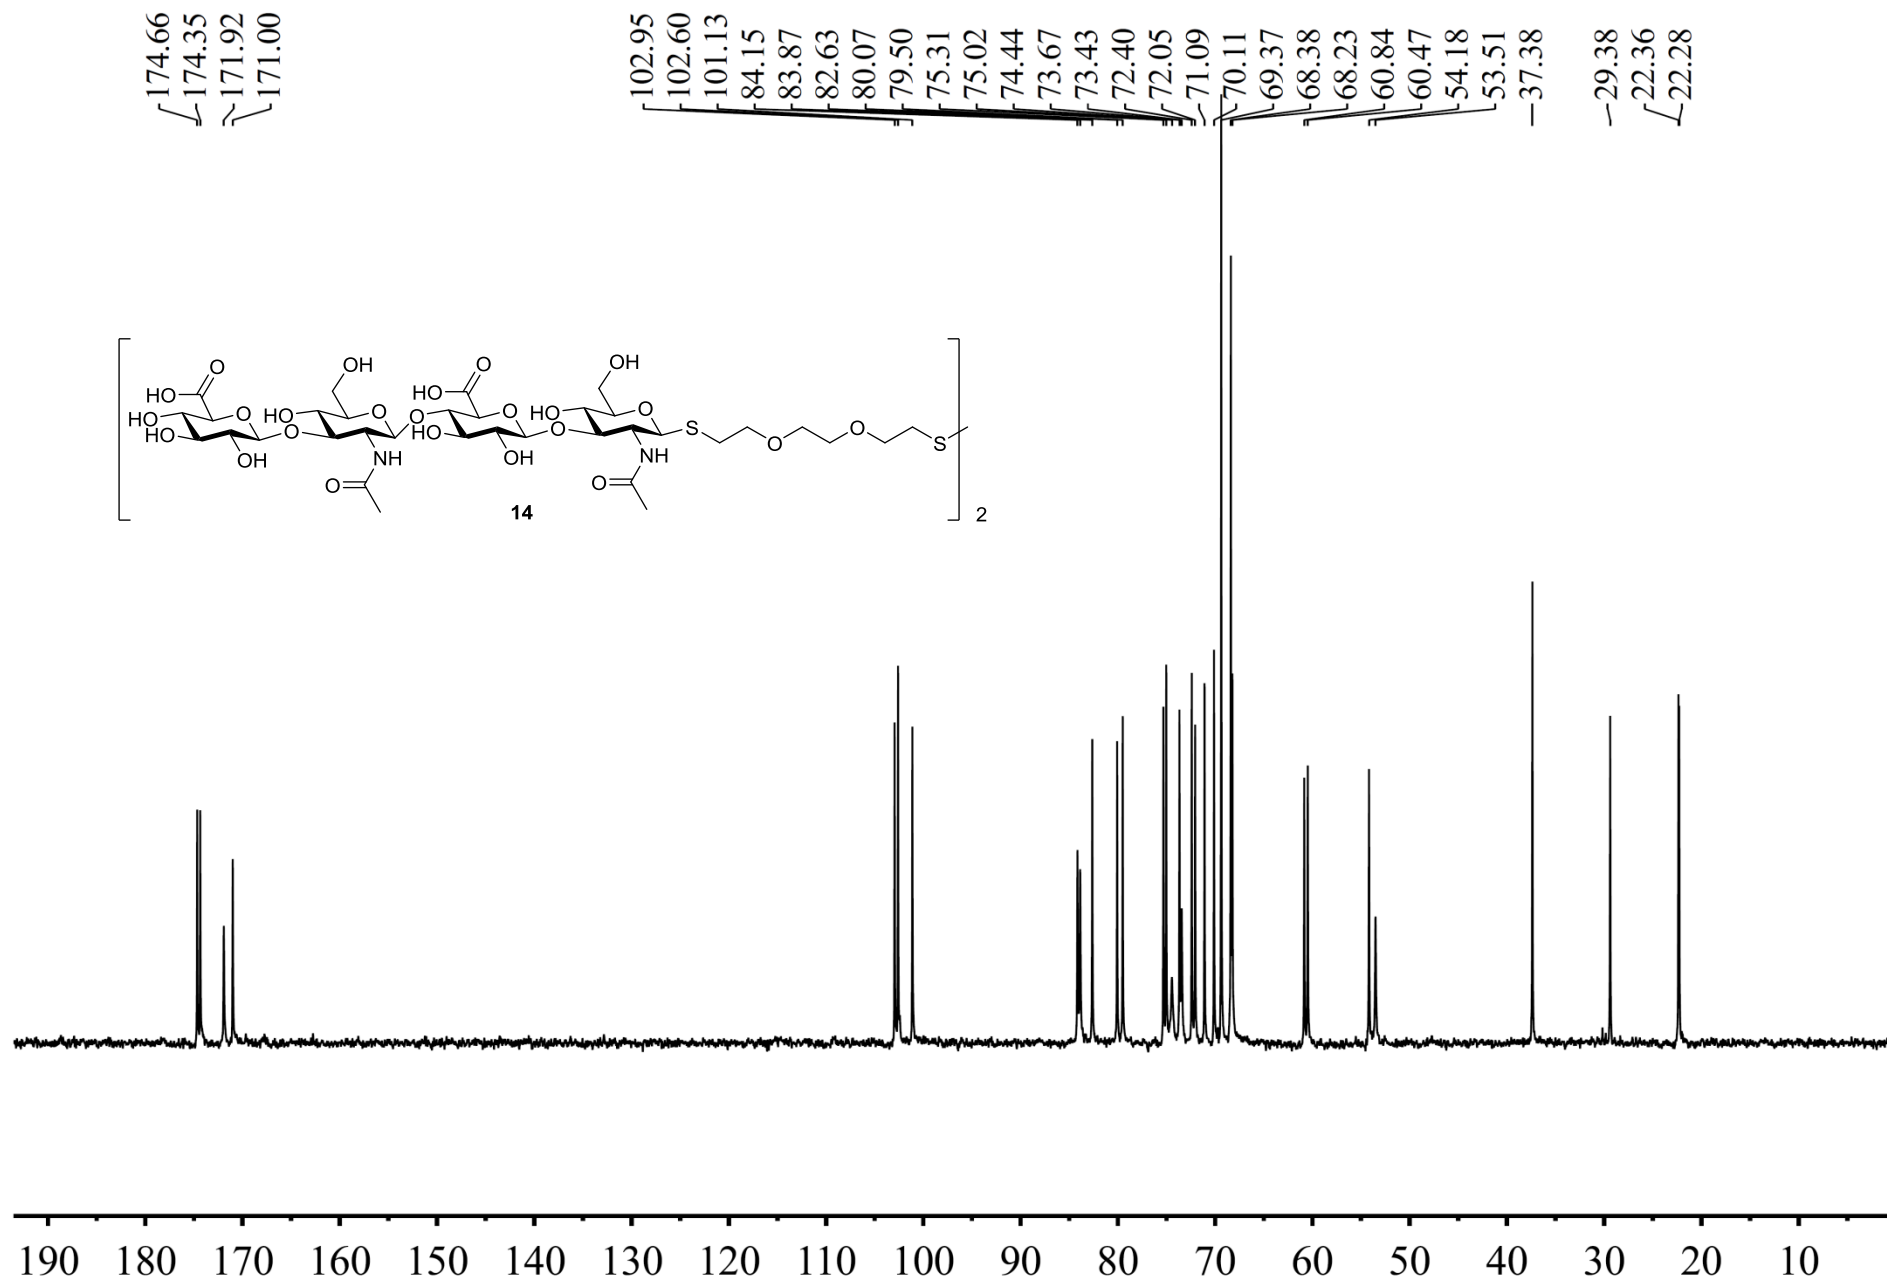

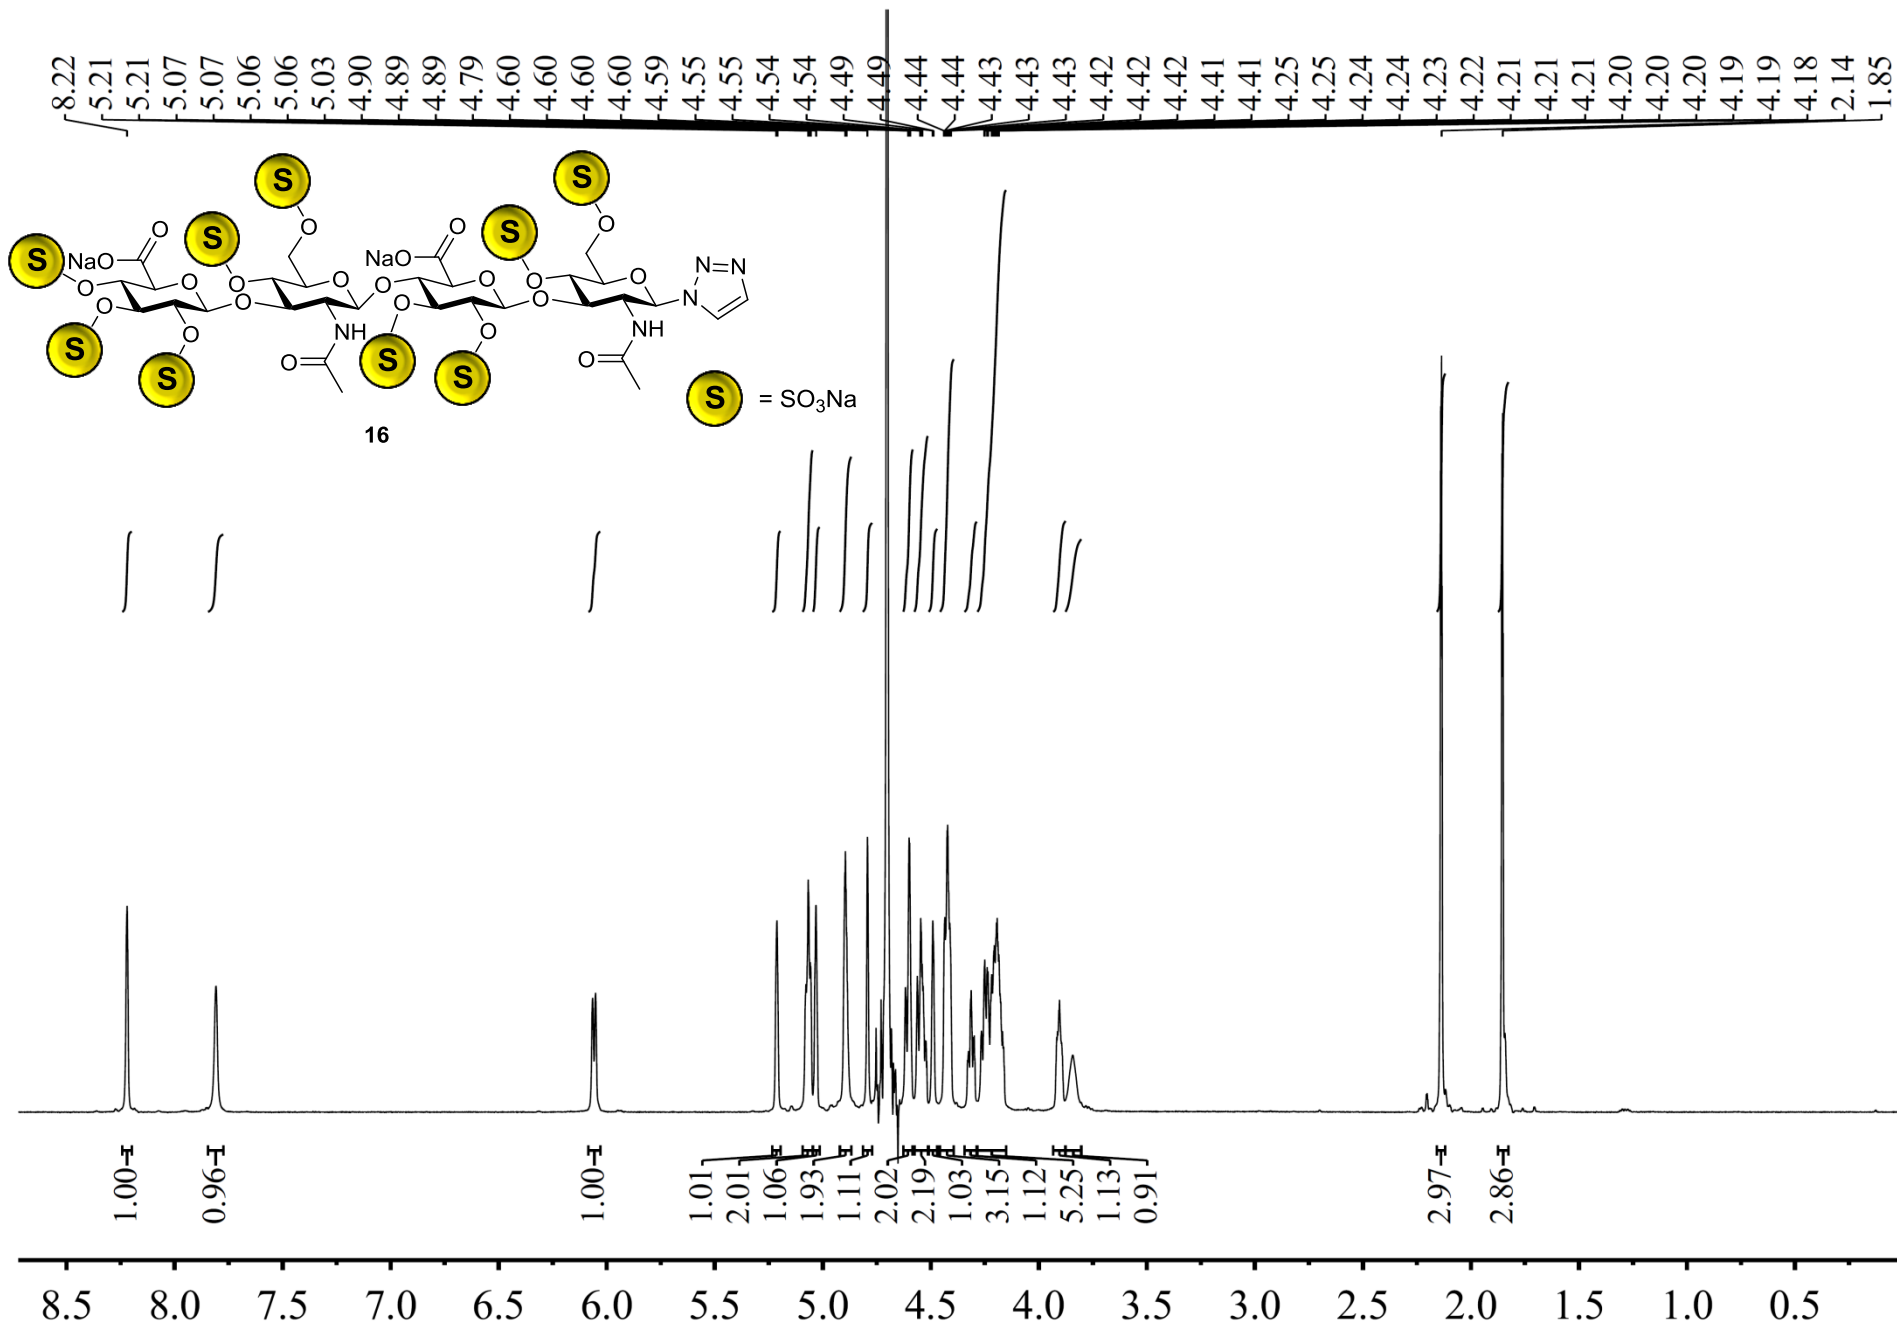

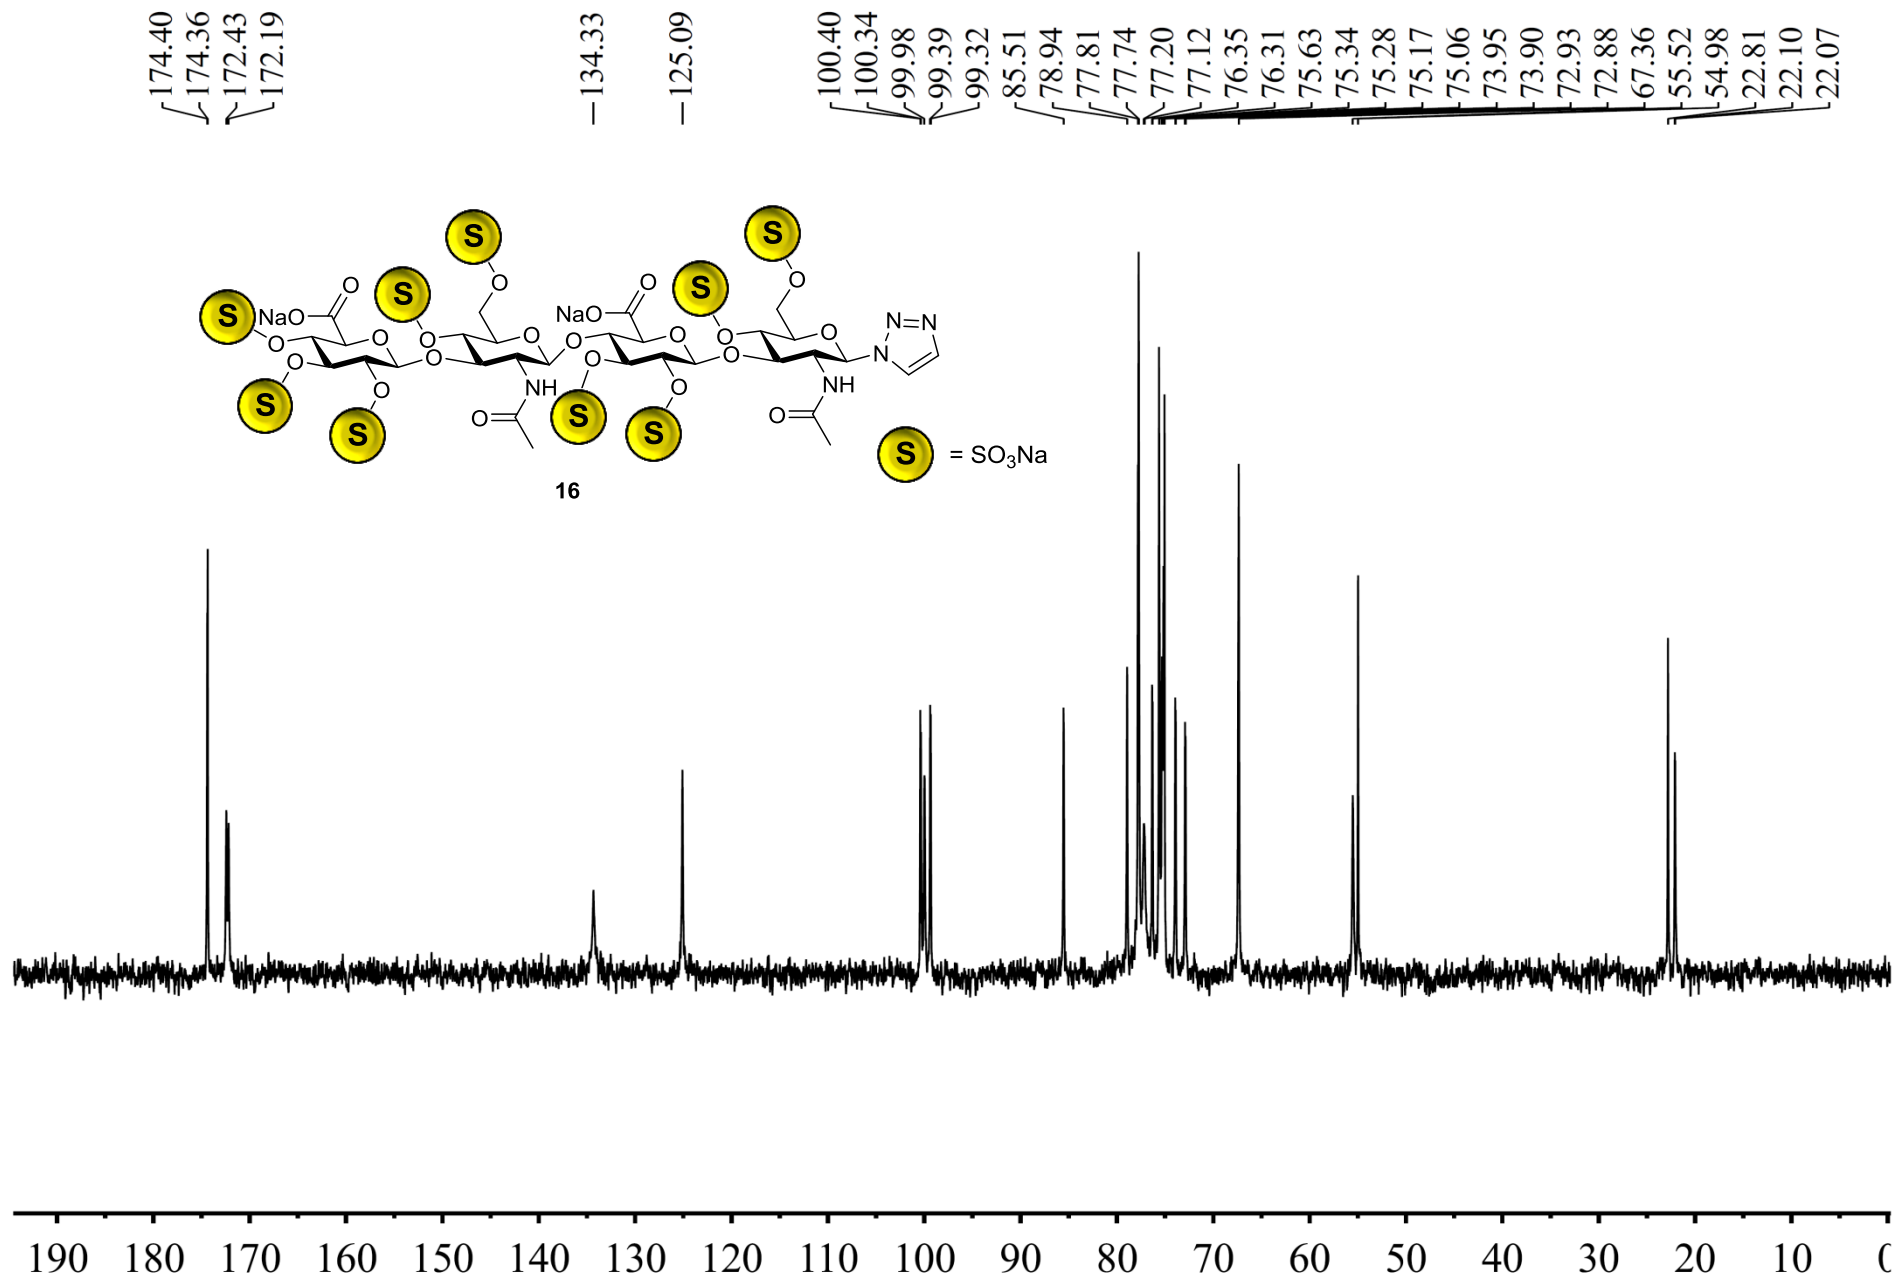

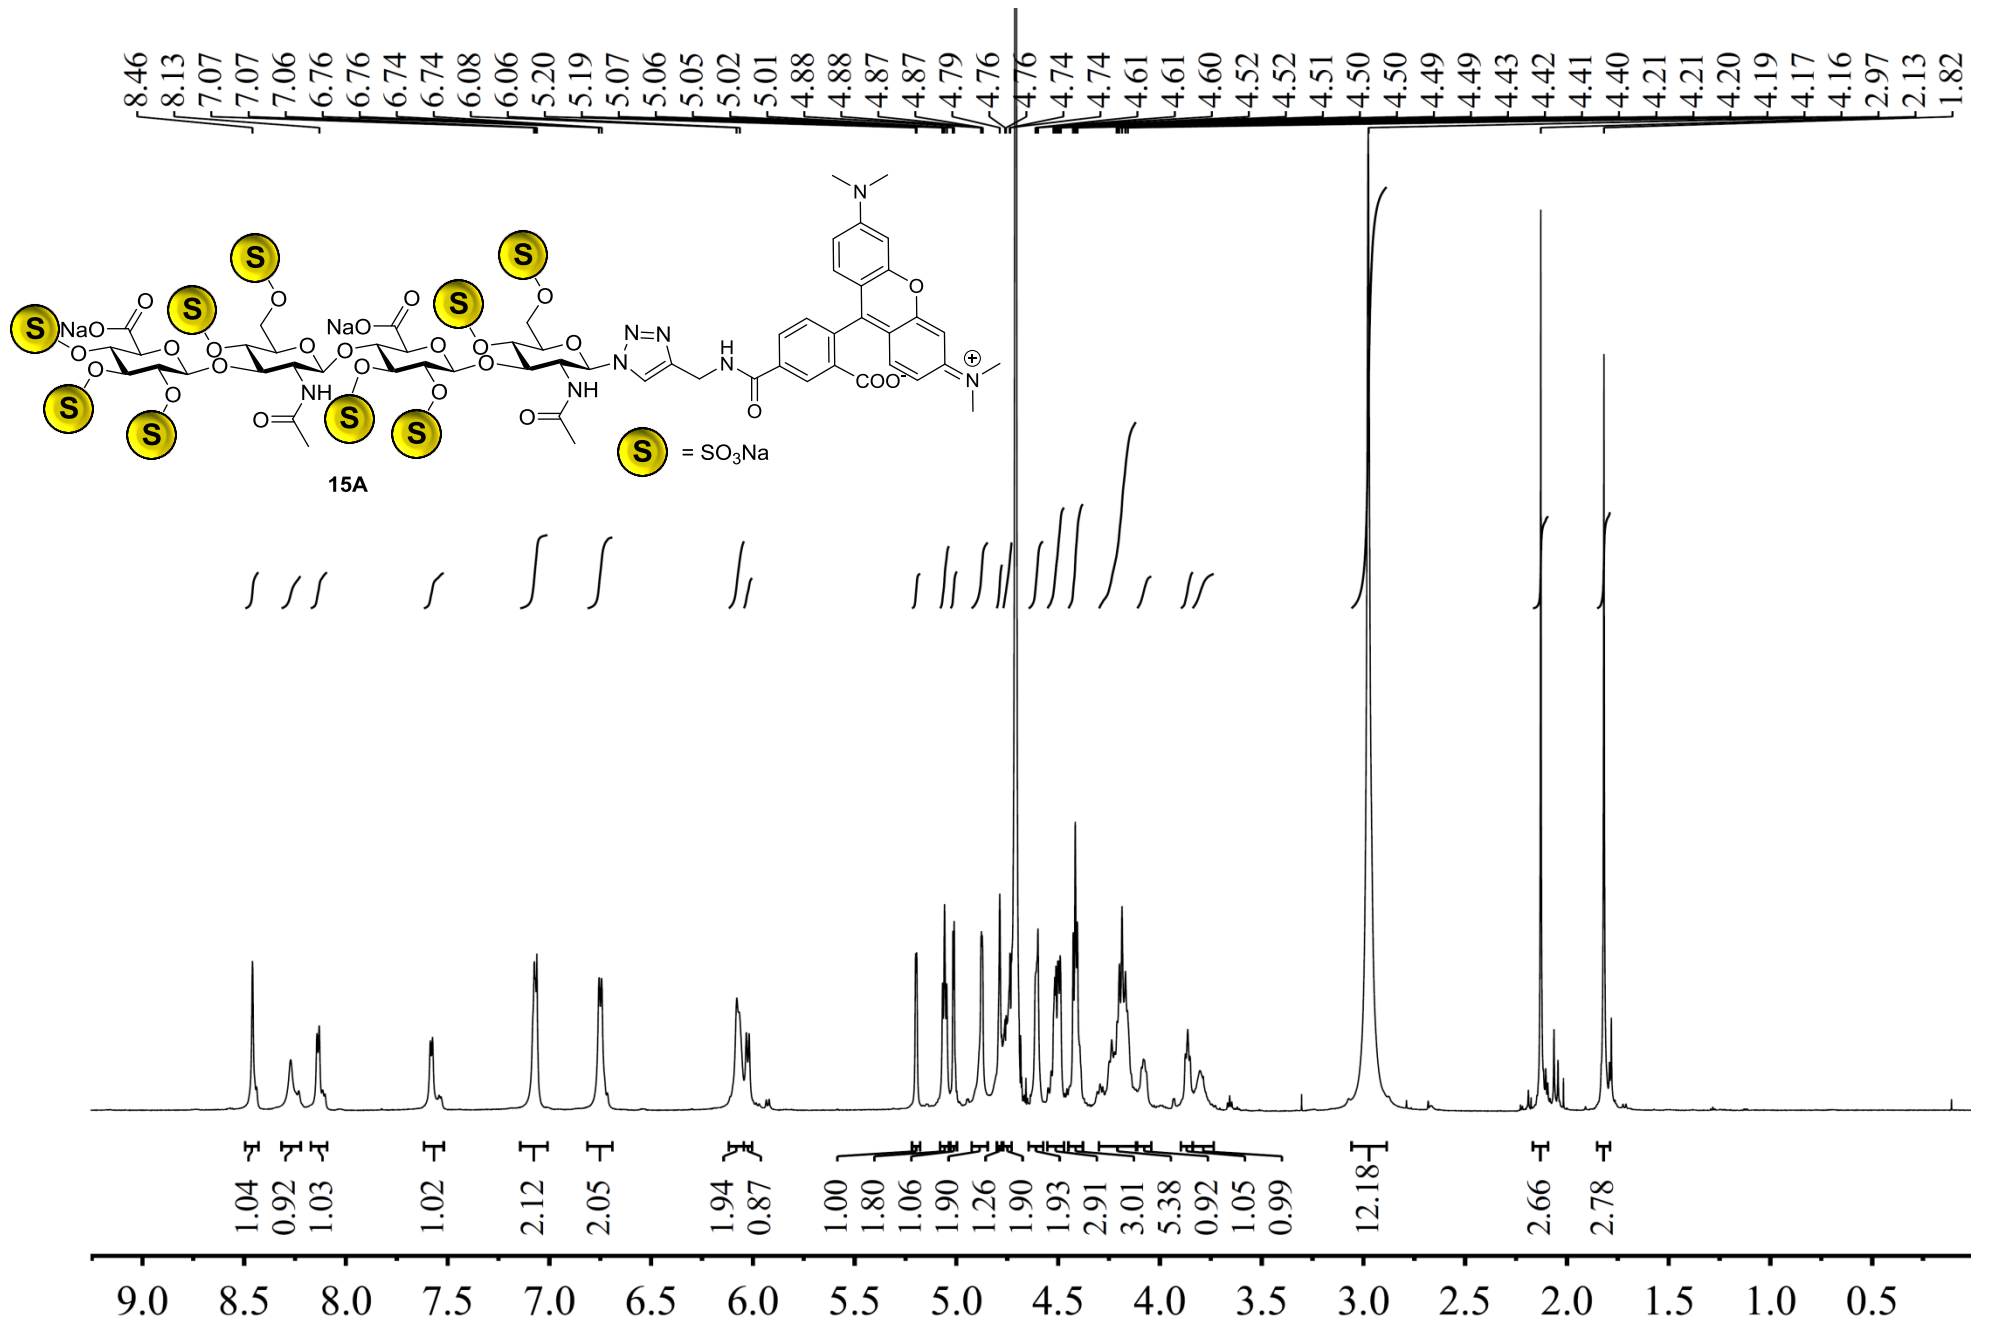



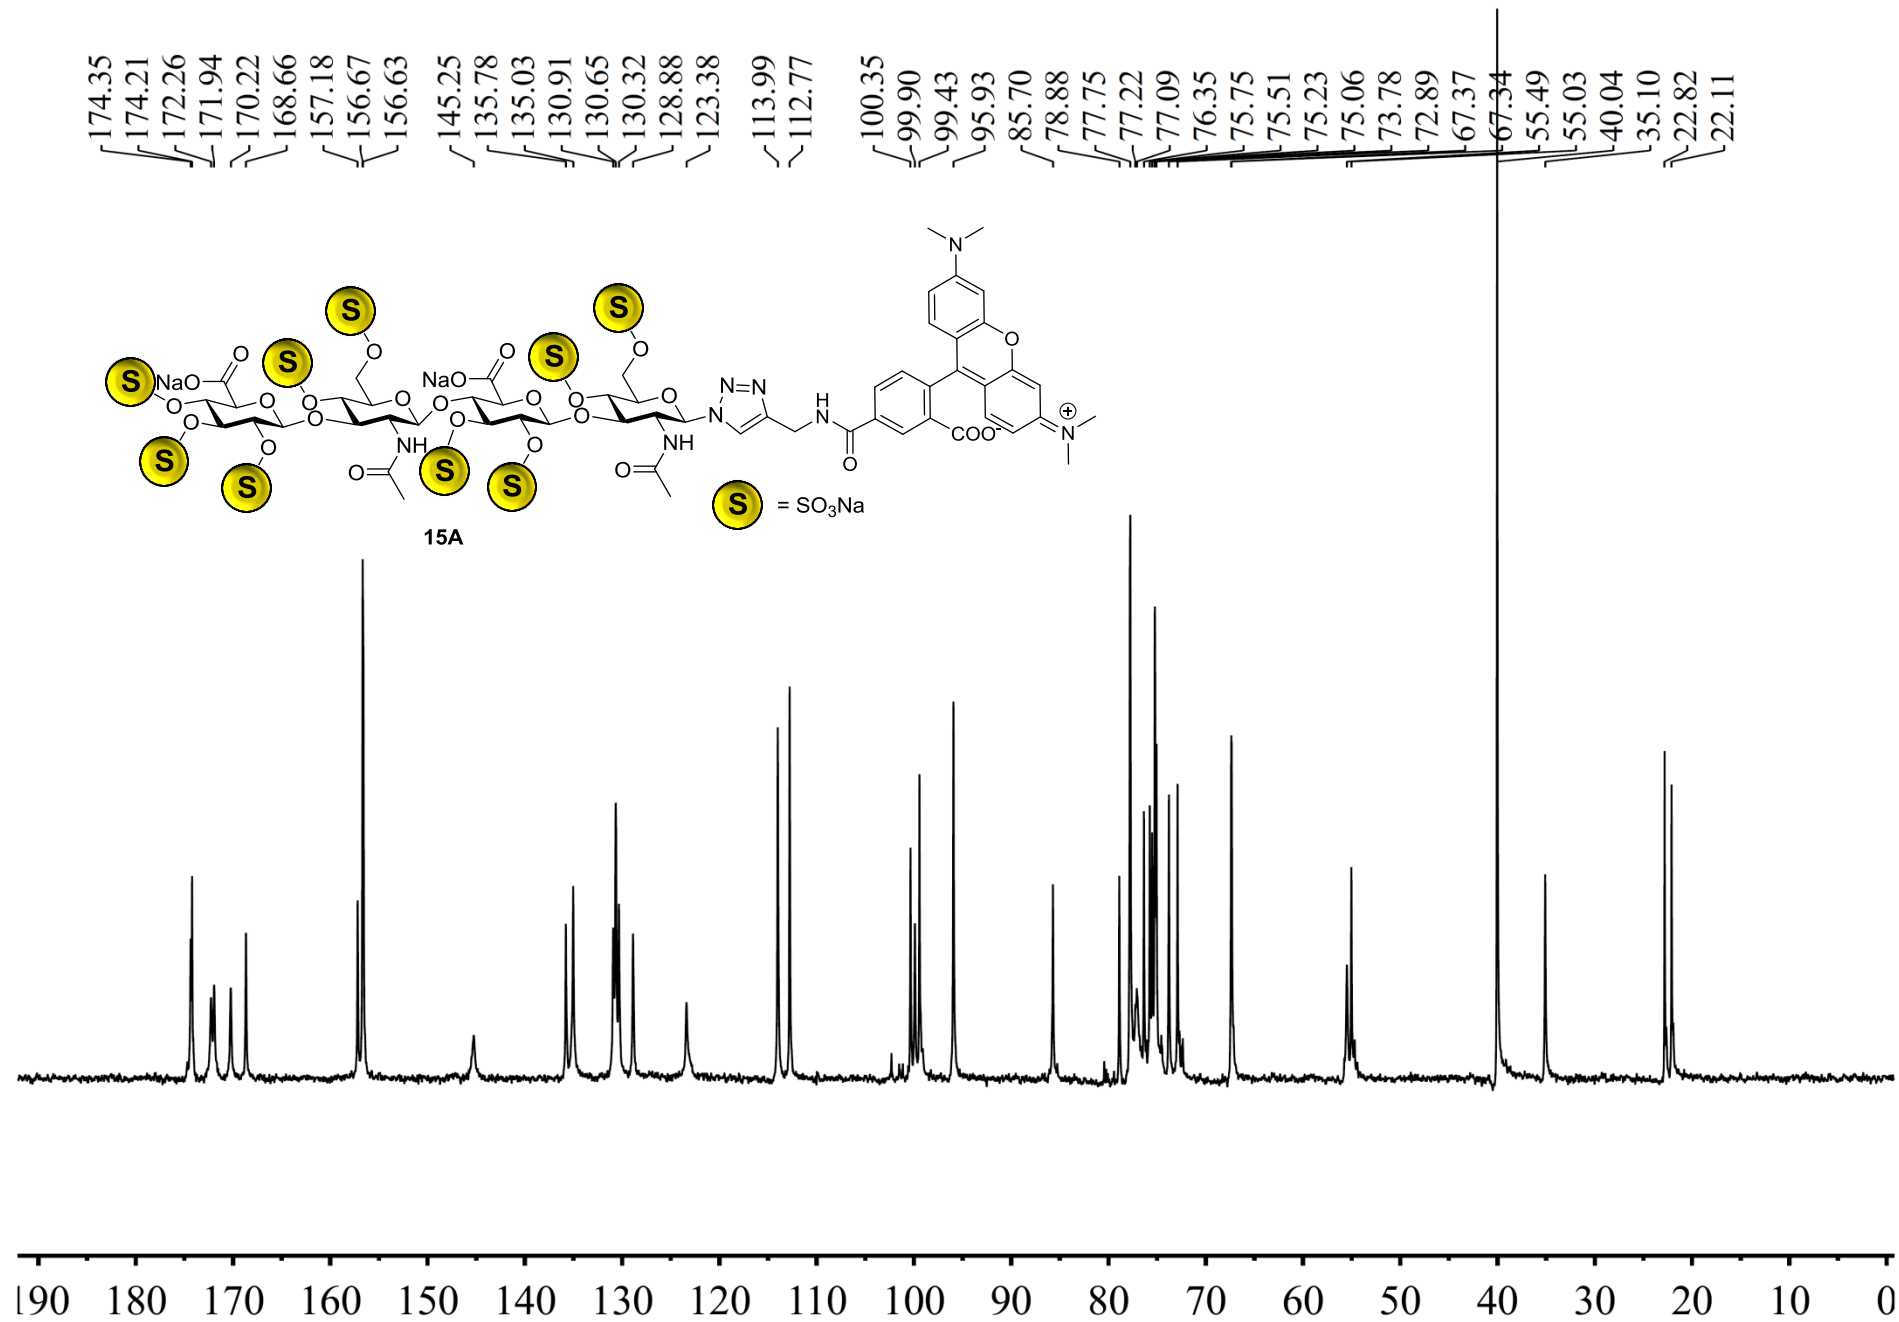

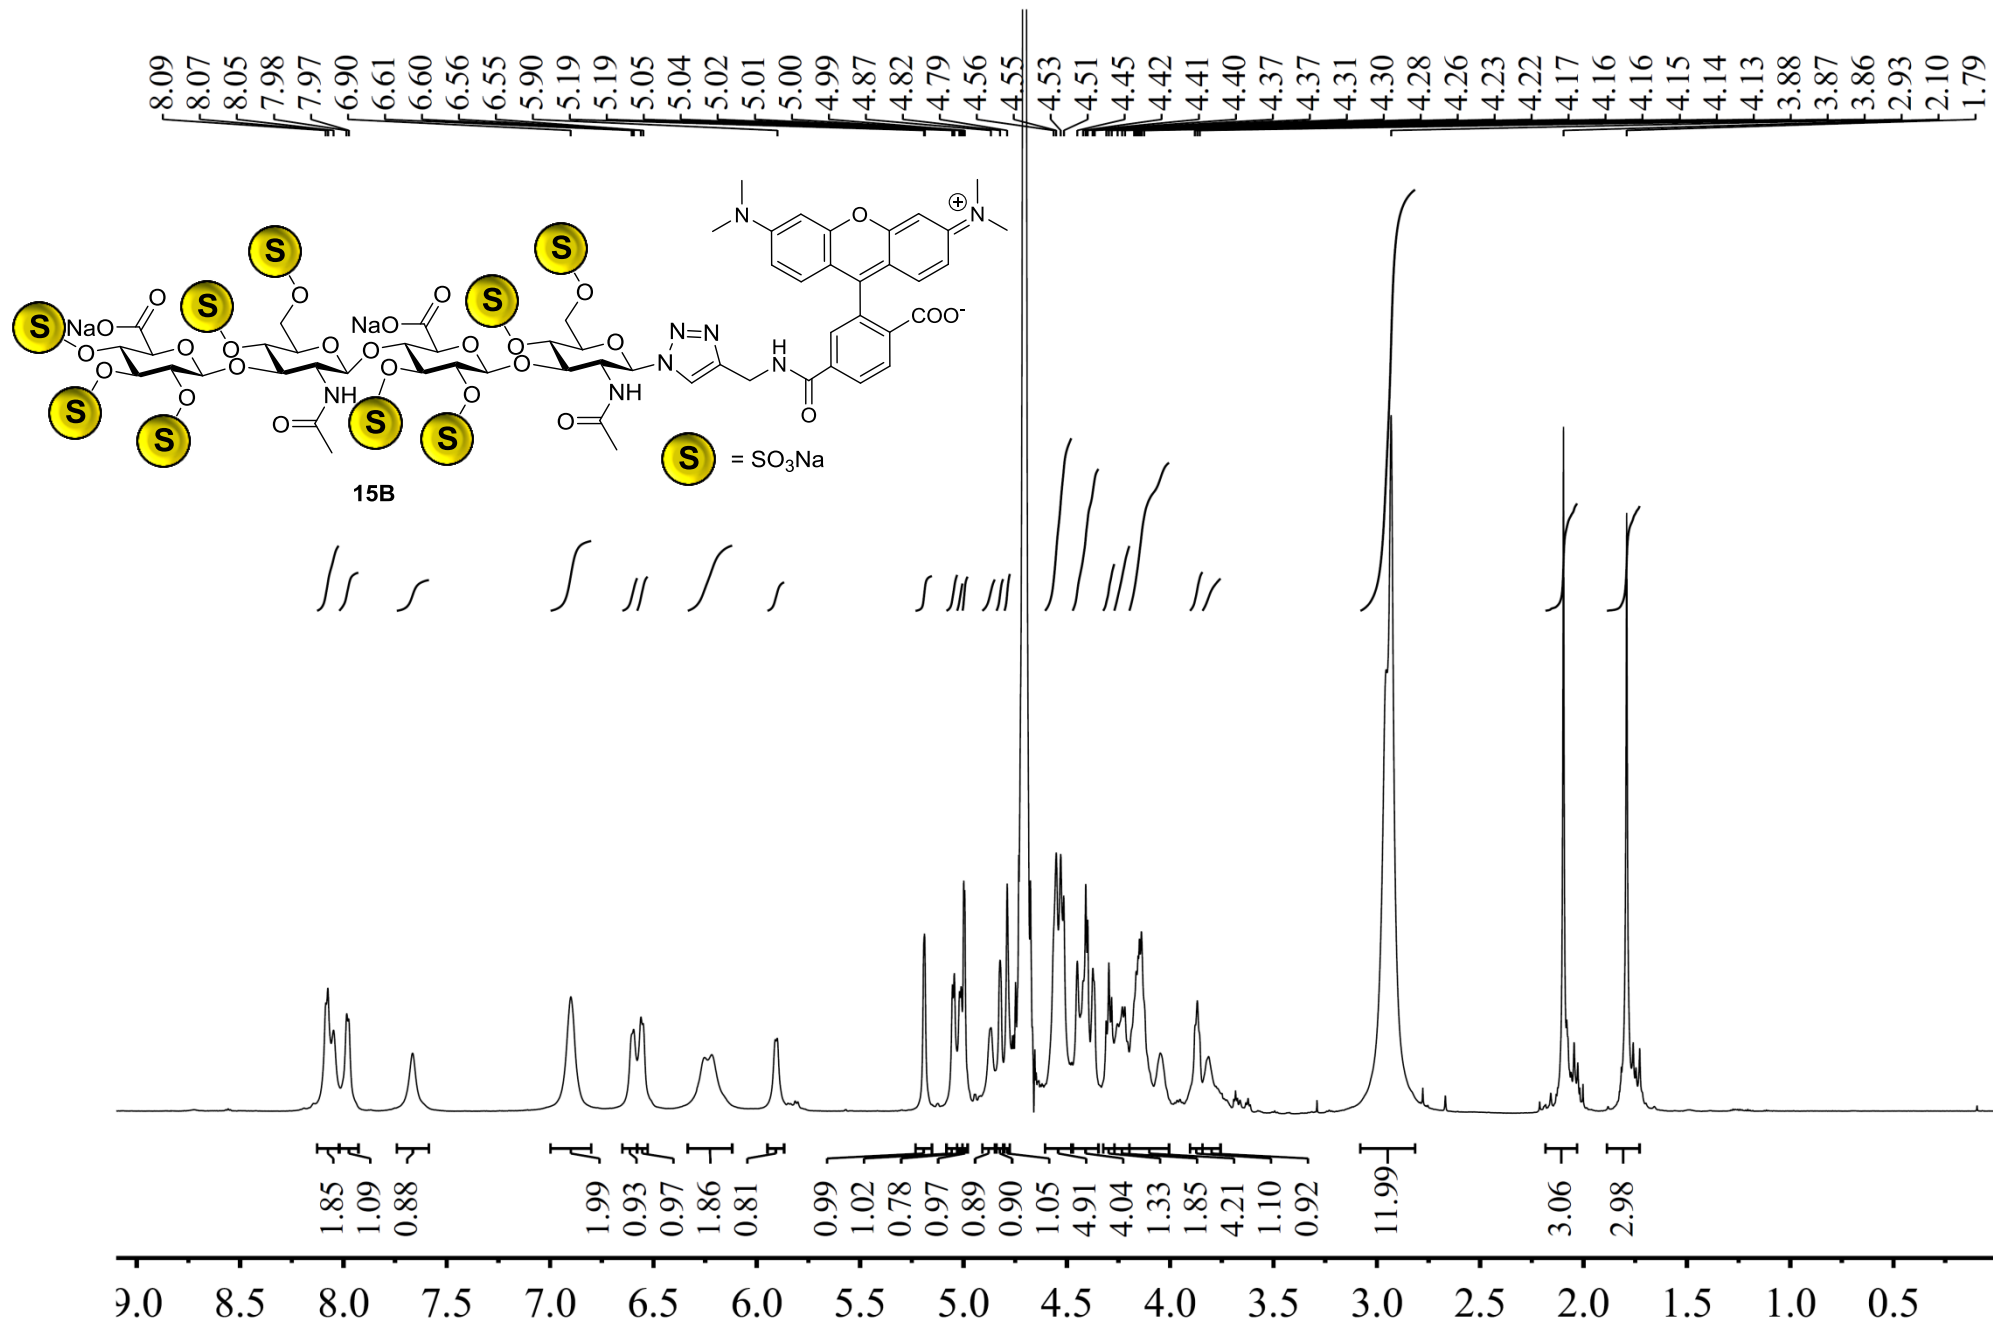

174.51  
 174.23  
 172.29  
 171.94  
 170.11  
 167.38  
 156.94  
 156.67  
 156.44  
 144.84  
 137.08  
 135.25  
 132.55  
 130.78  
 130.53  
 129.52  
 128.38  
 122.68  
 113.72  
 112.59  
 112.51  
 100.45  
 99.68  
 99.39  
 95.99  
 85.67  
 78.59  
 77.75  
 77.37  
 77.06  
 76.39  
 75.69  
 75.34  
 75.24  
 75.19  
 75.12  
 73.81  
 72.89  
 67.34  
 55.39  
 55.22  
 39.98  
 35.31  
 22.74  
 22.04

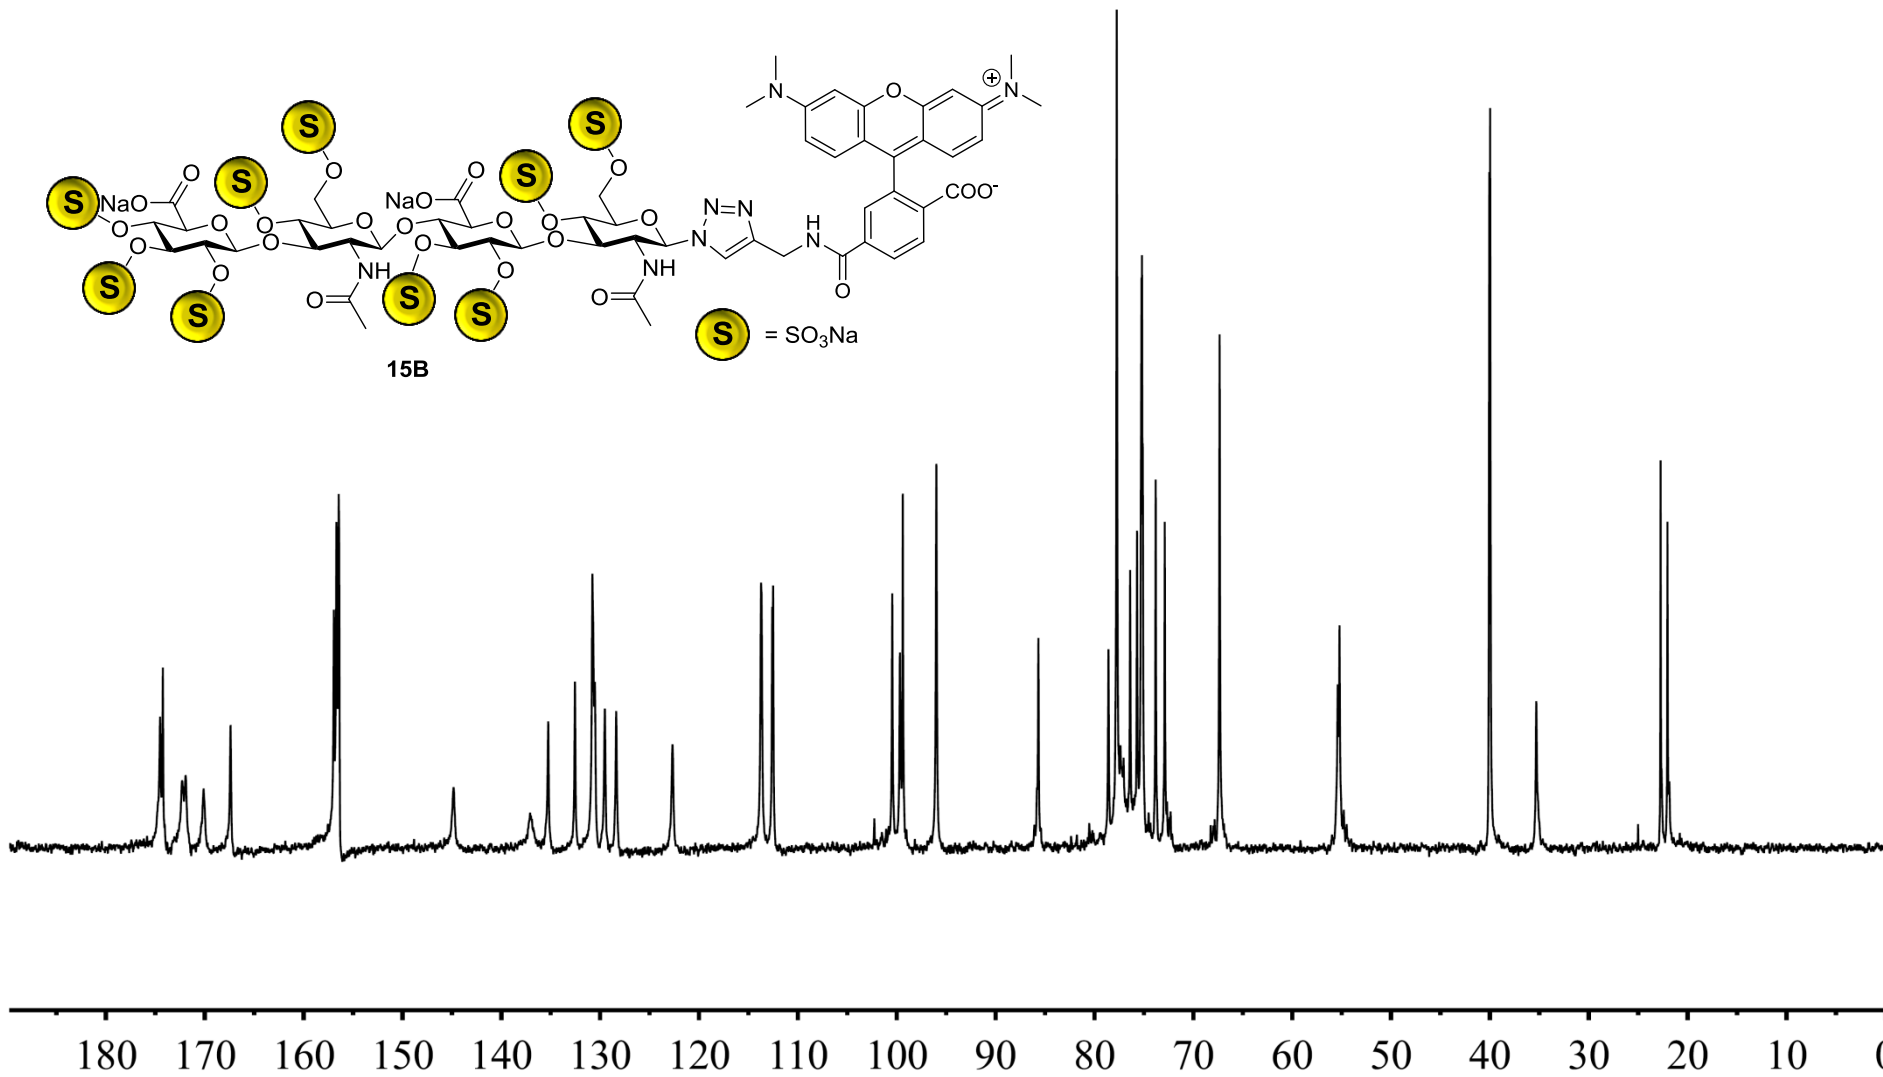

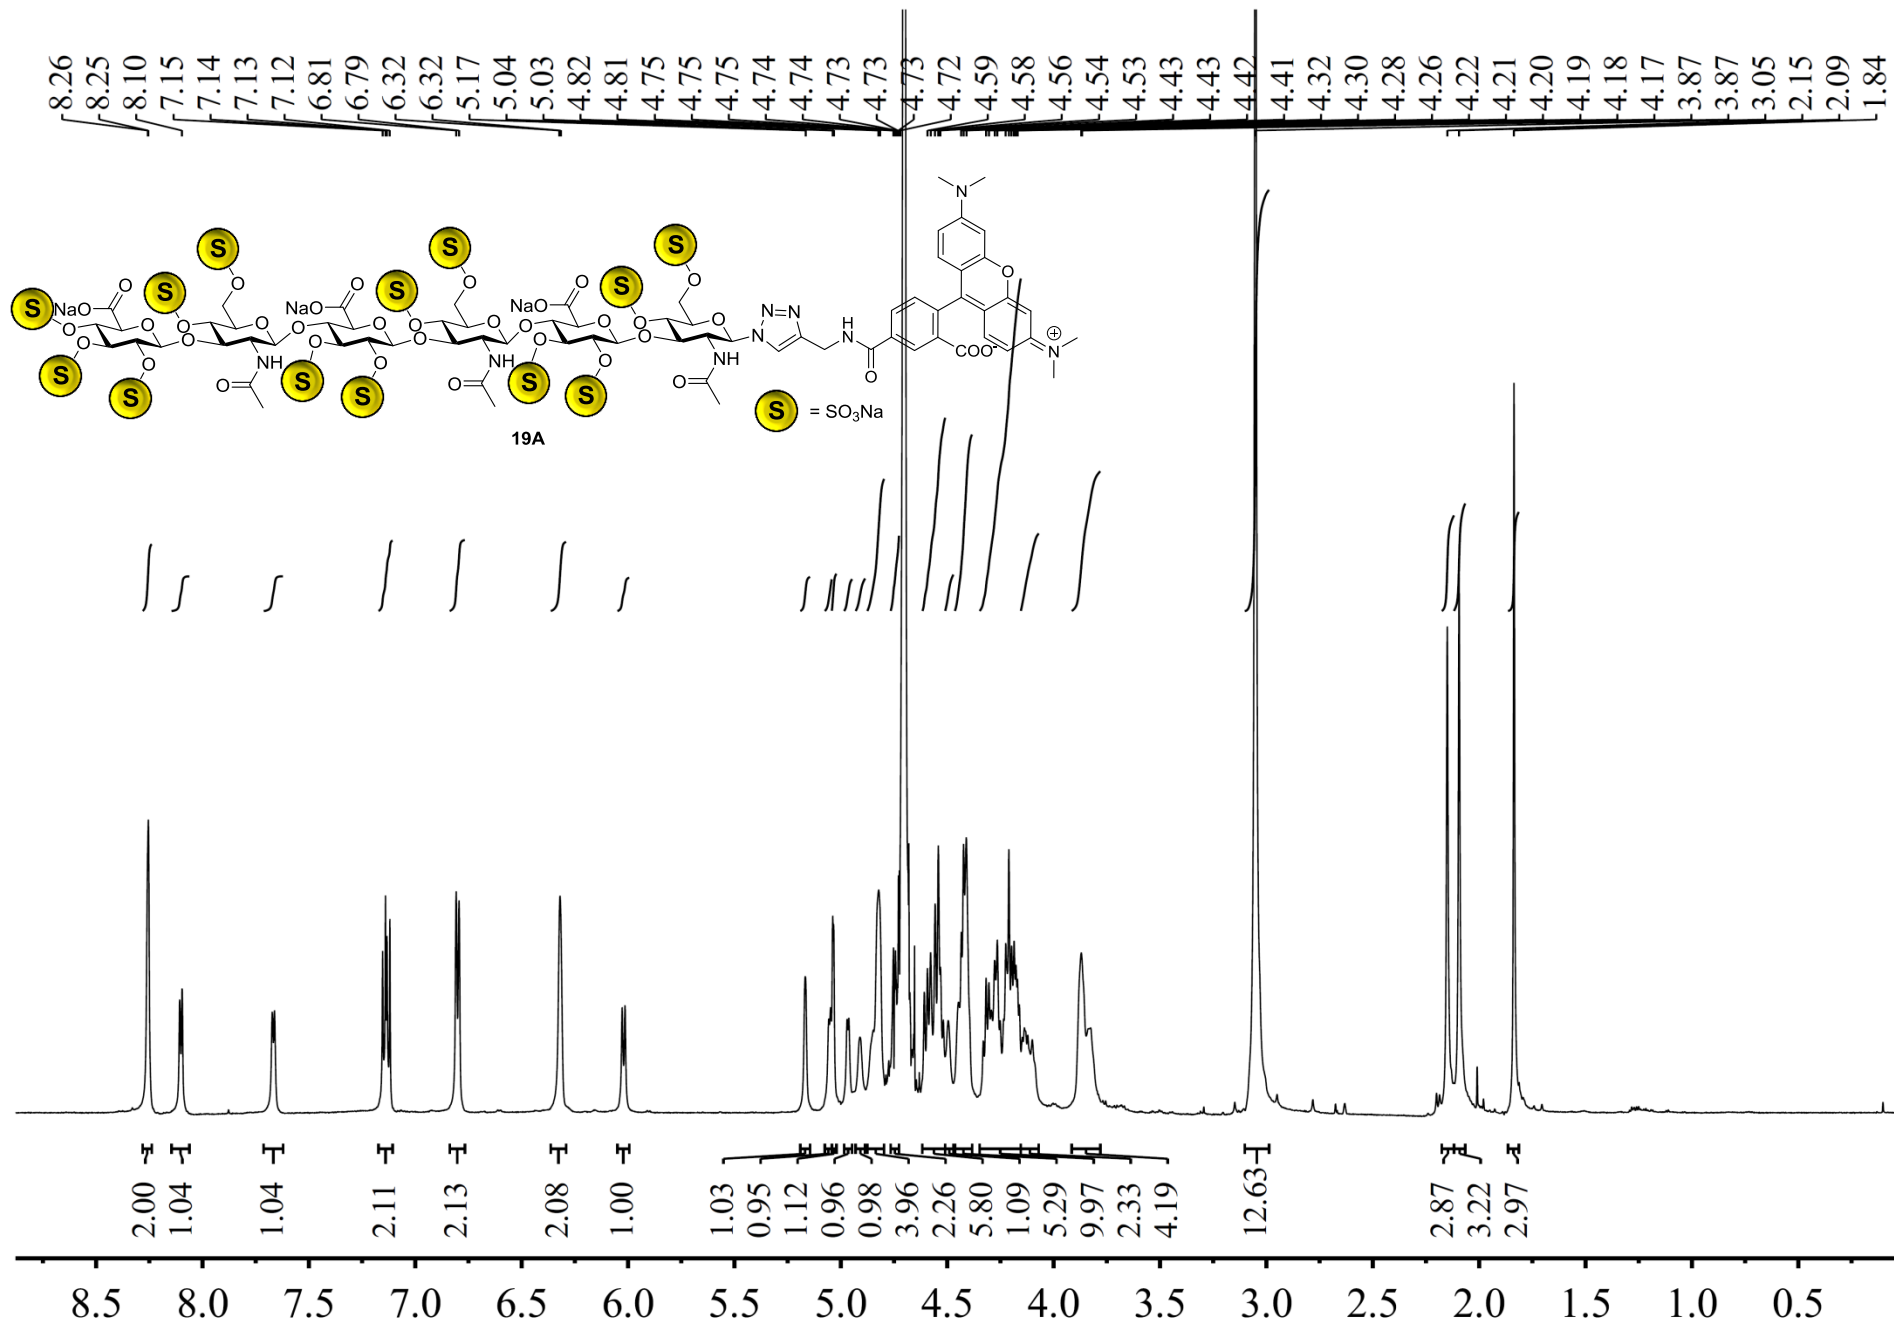

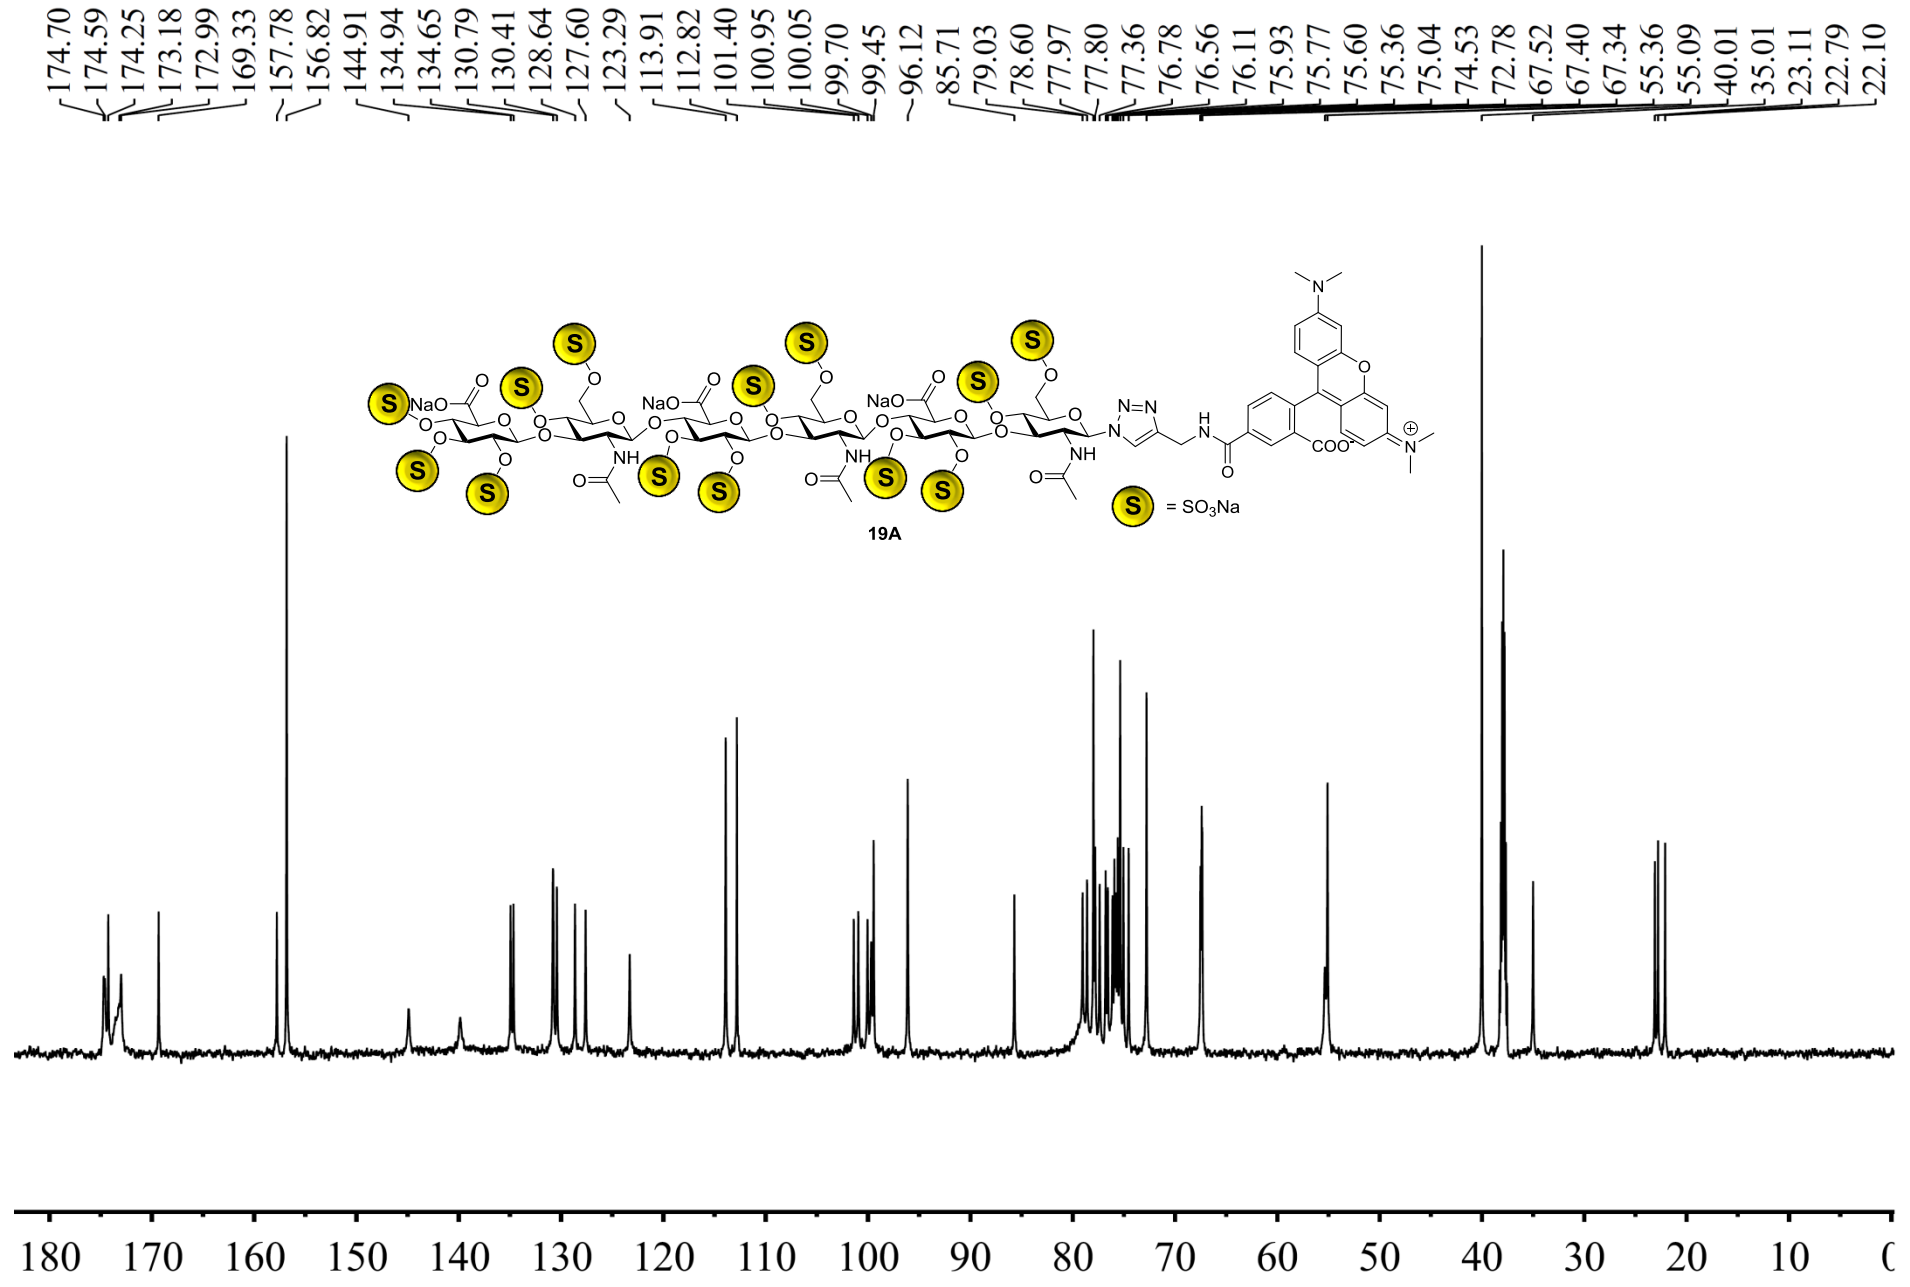

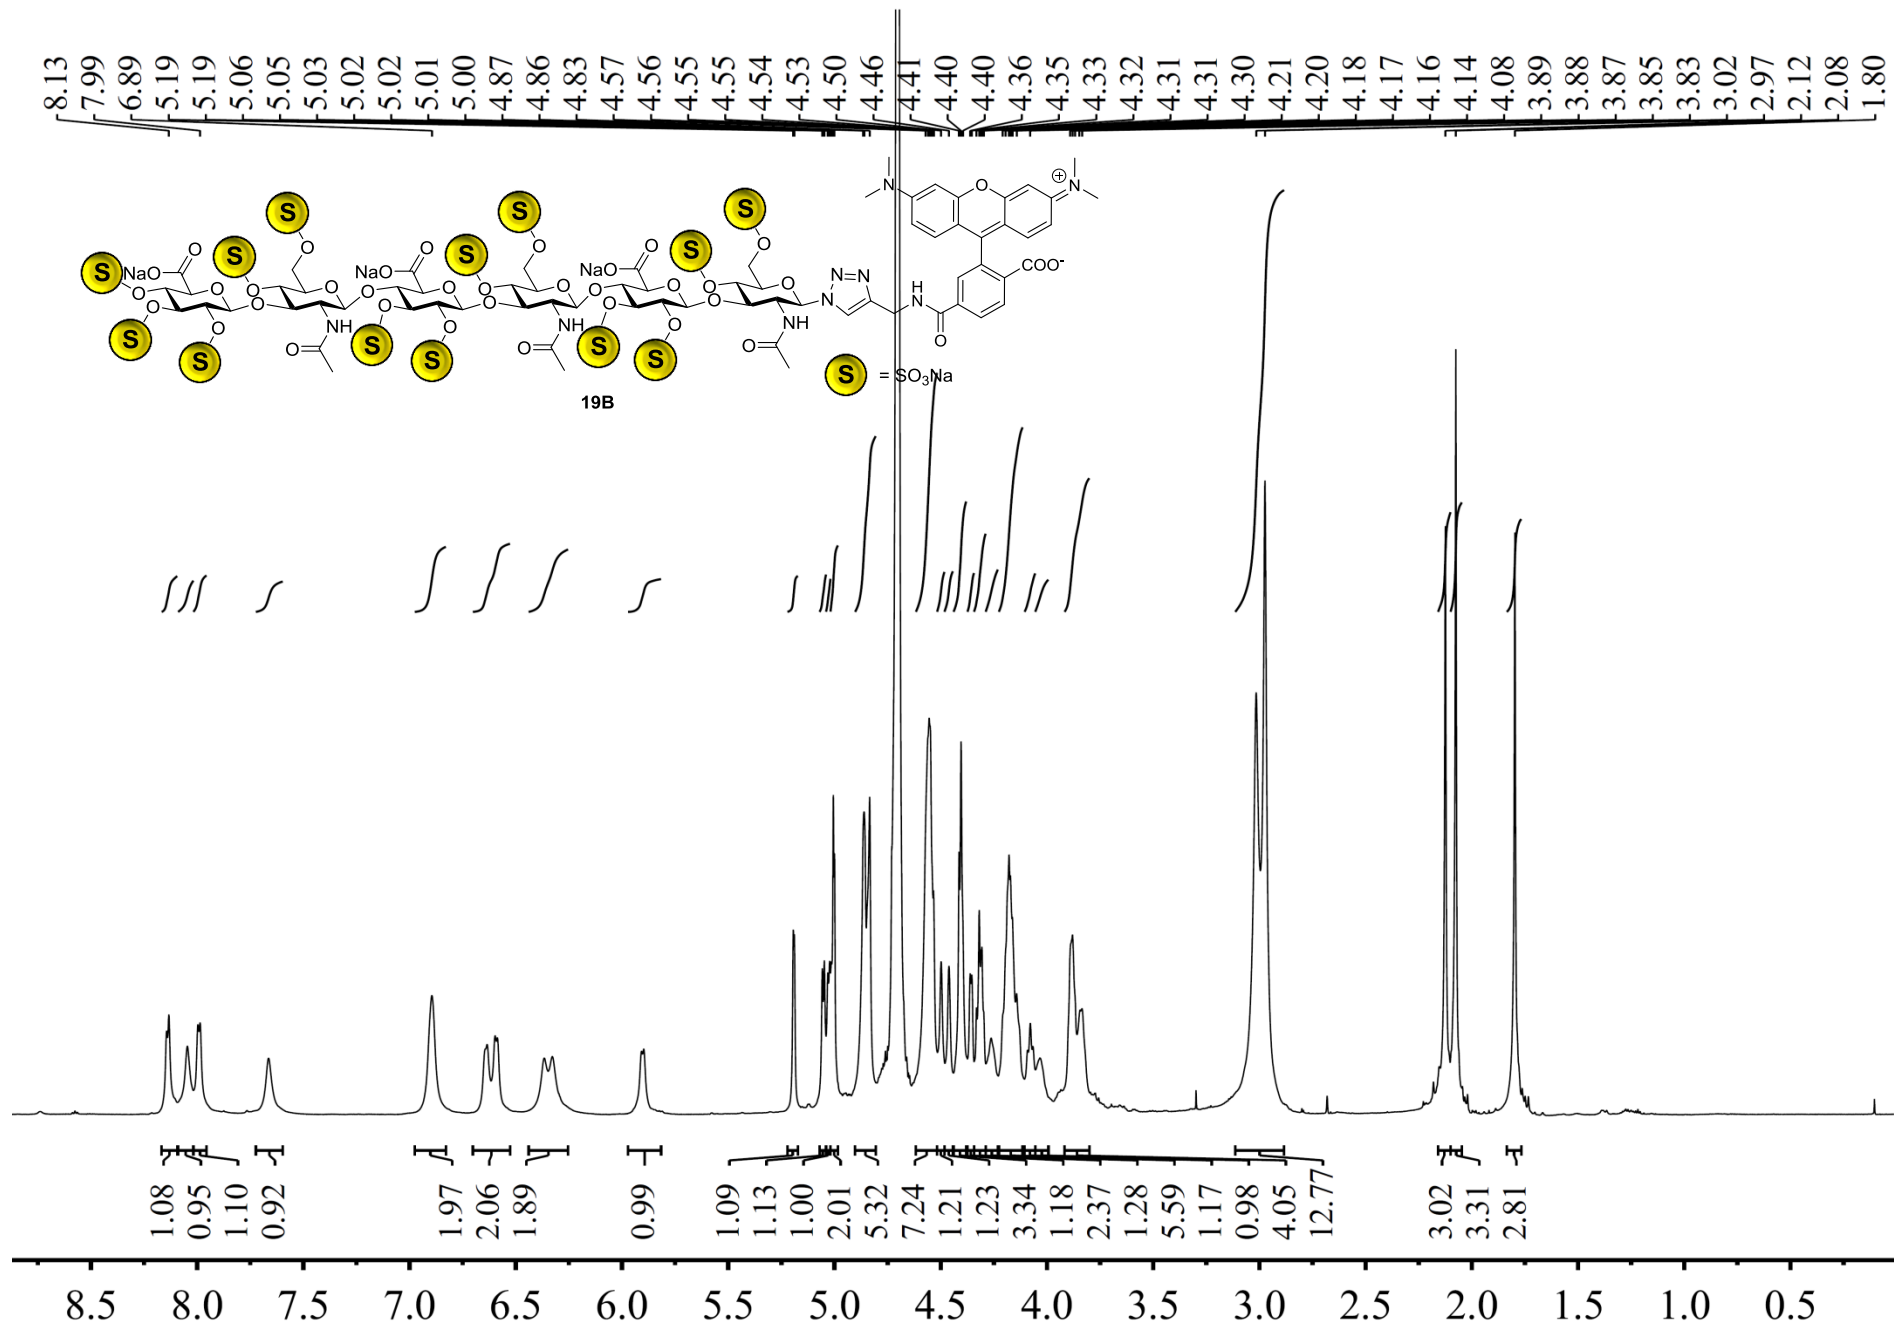

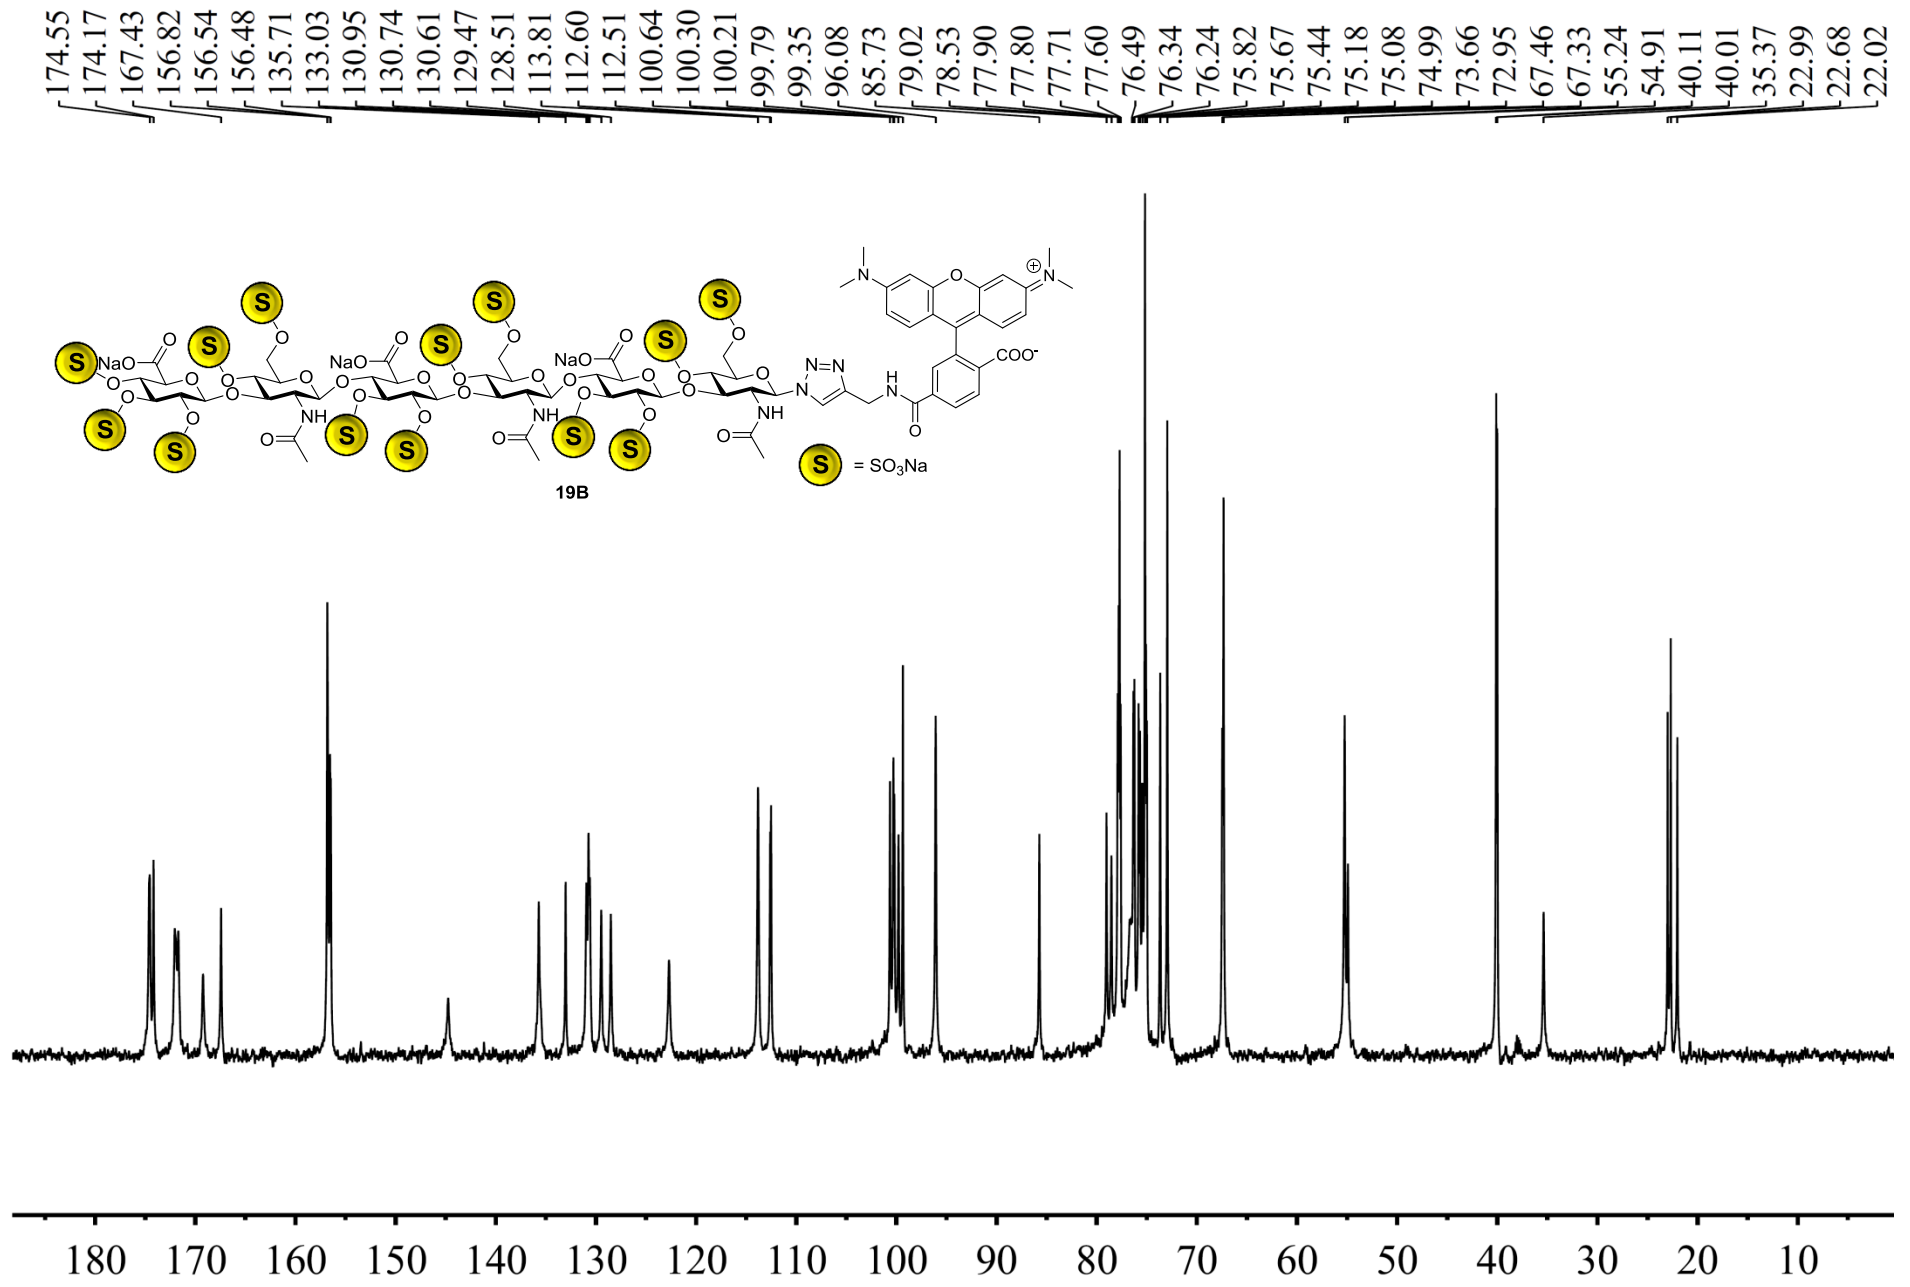

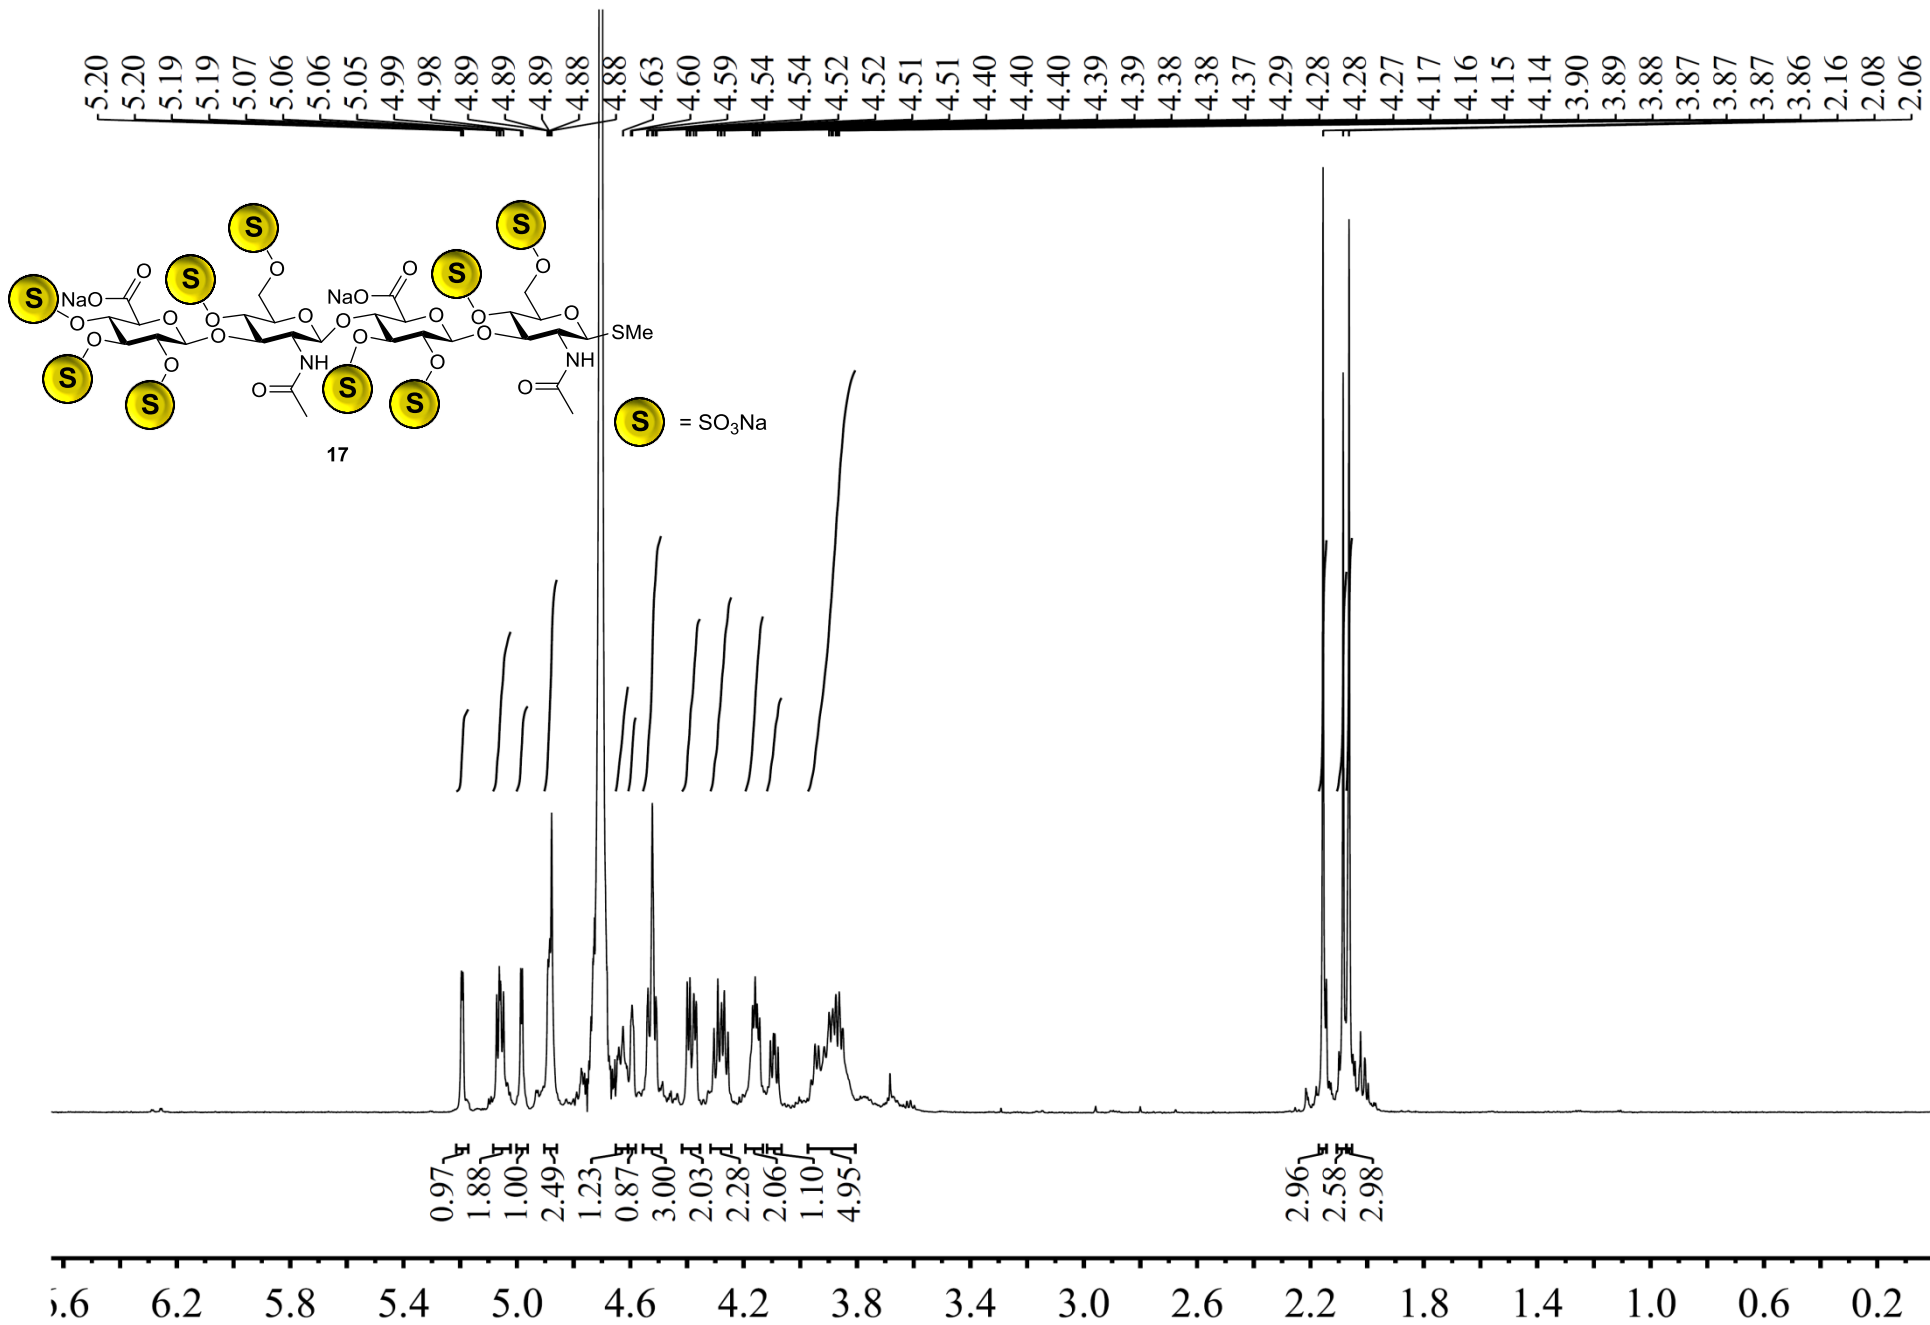



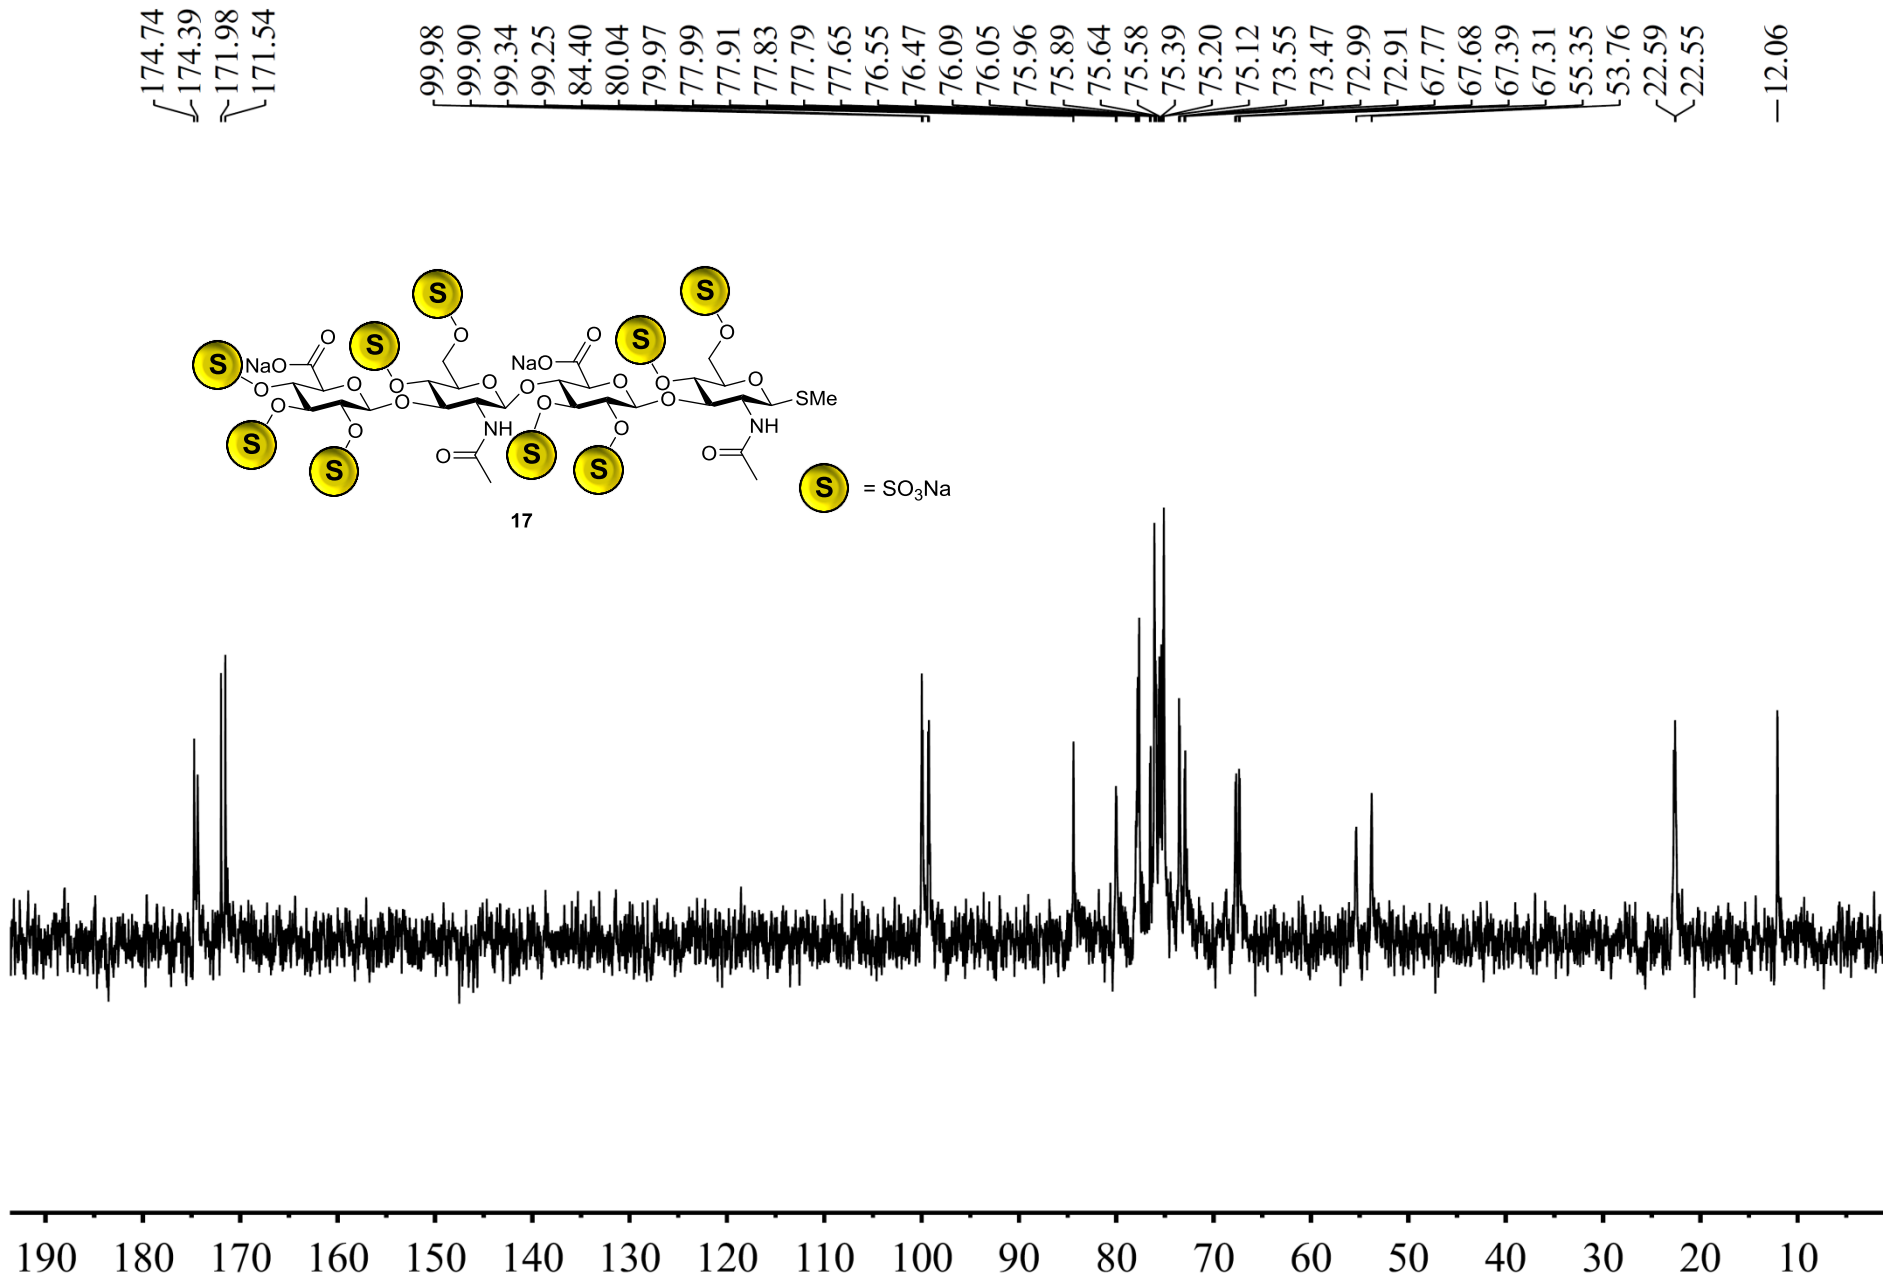

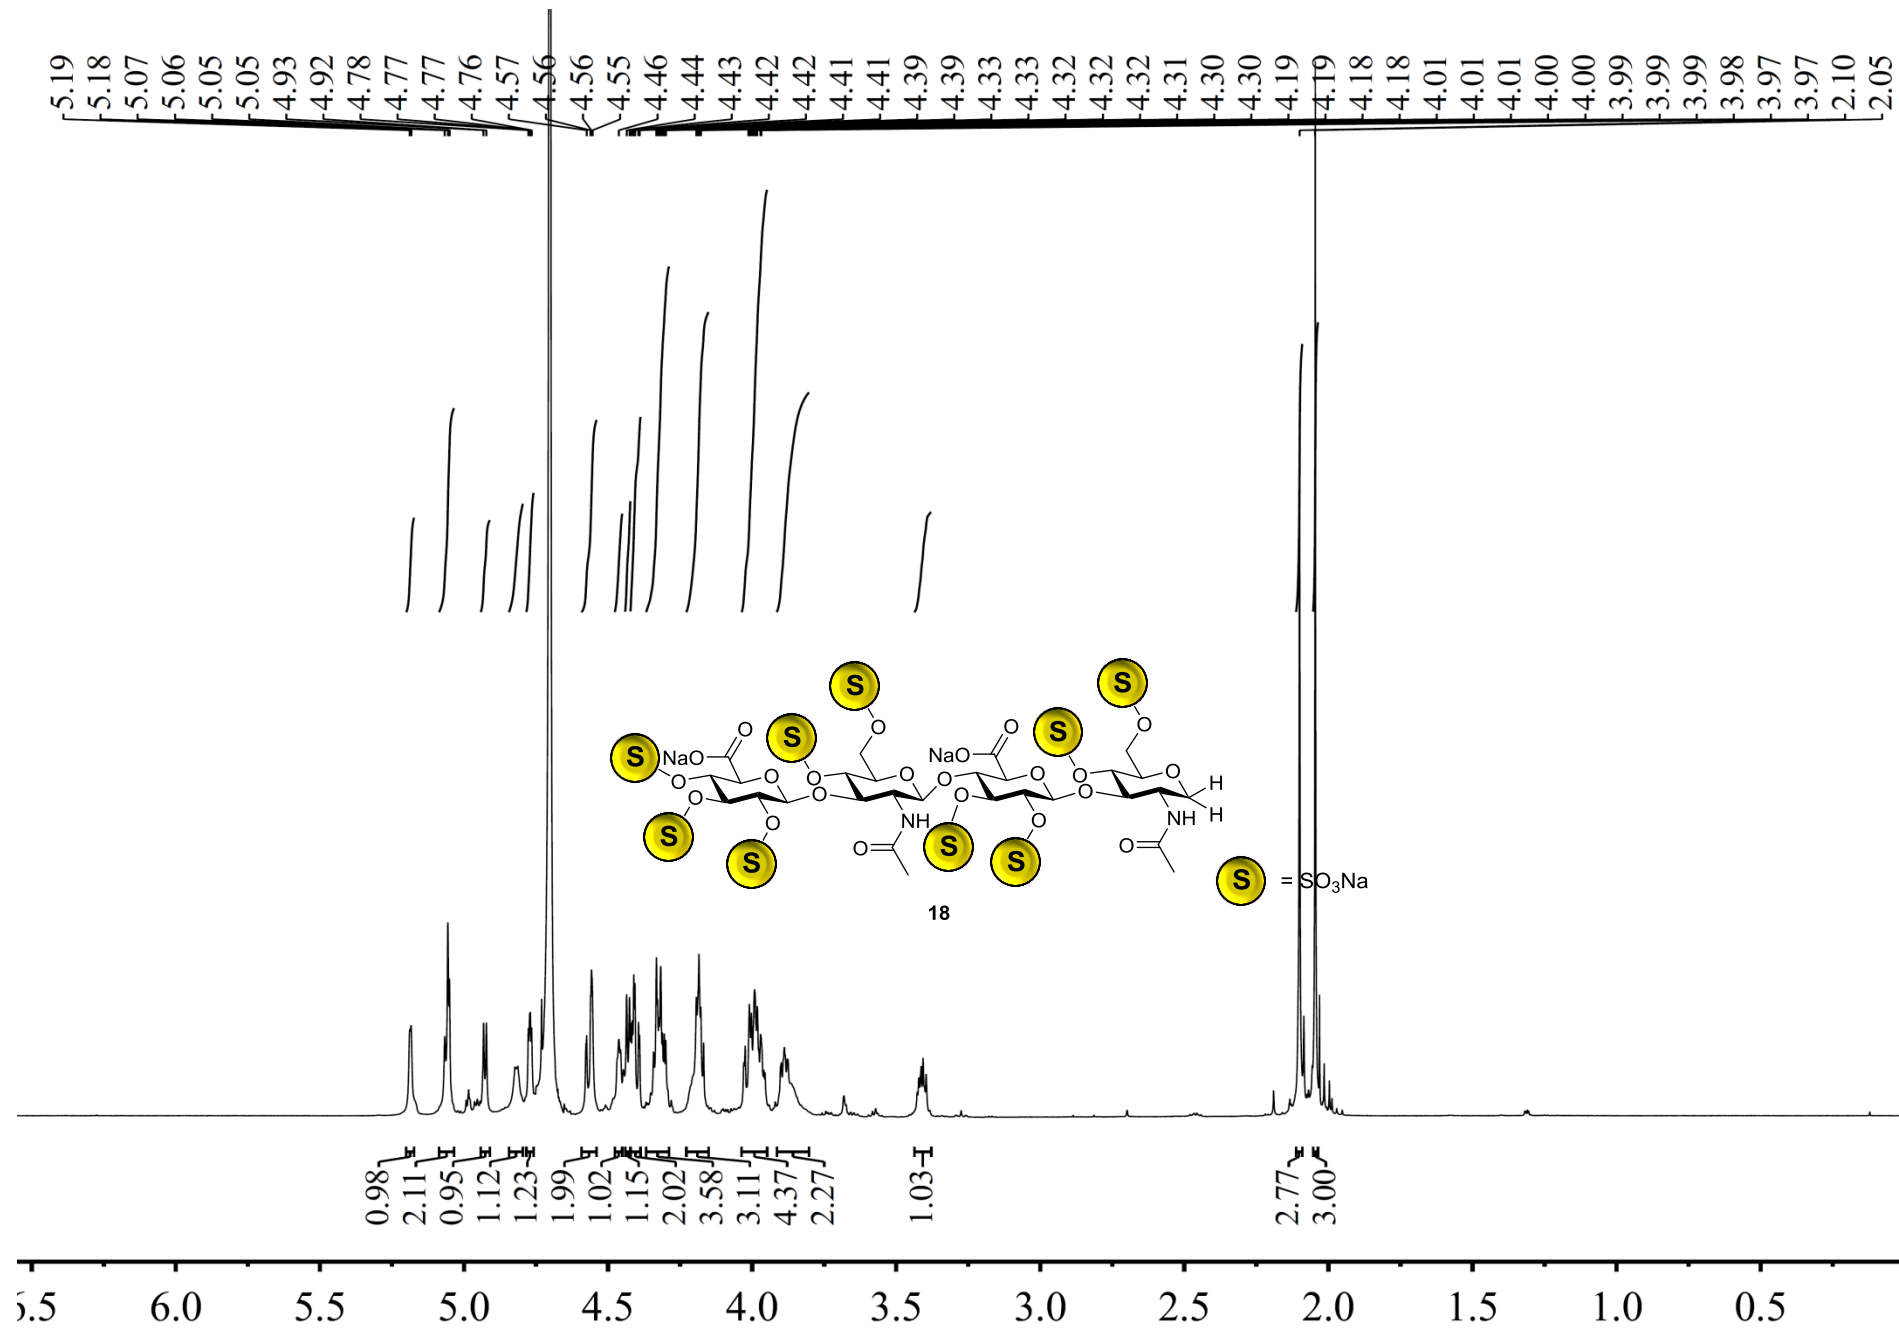



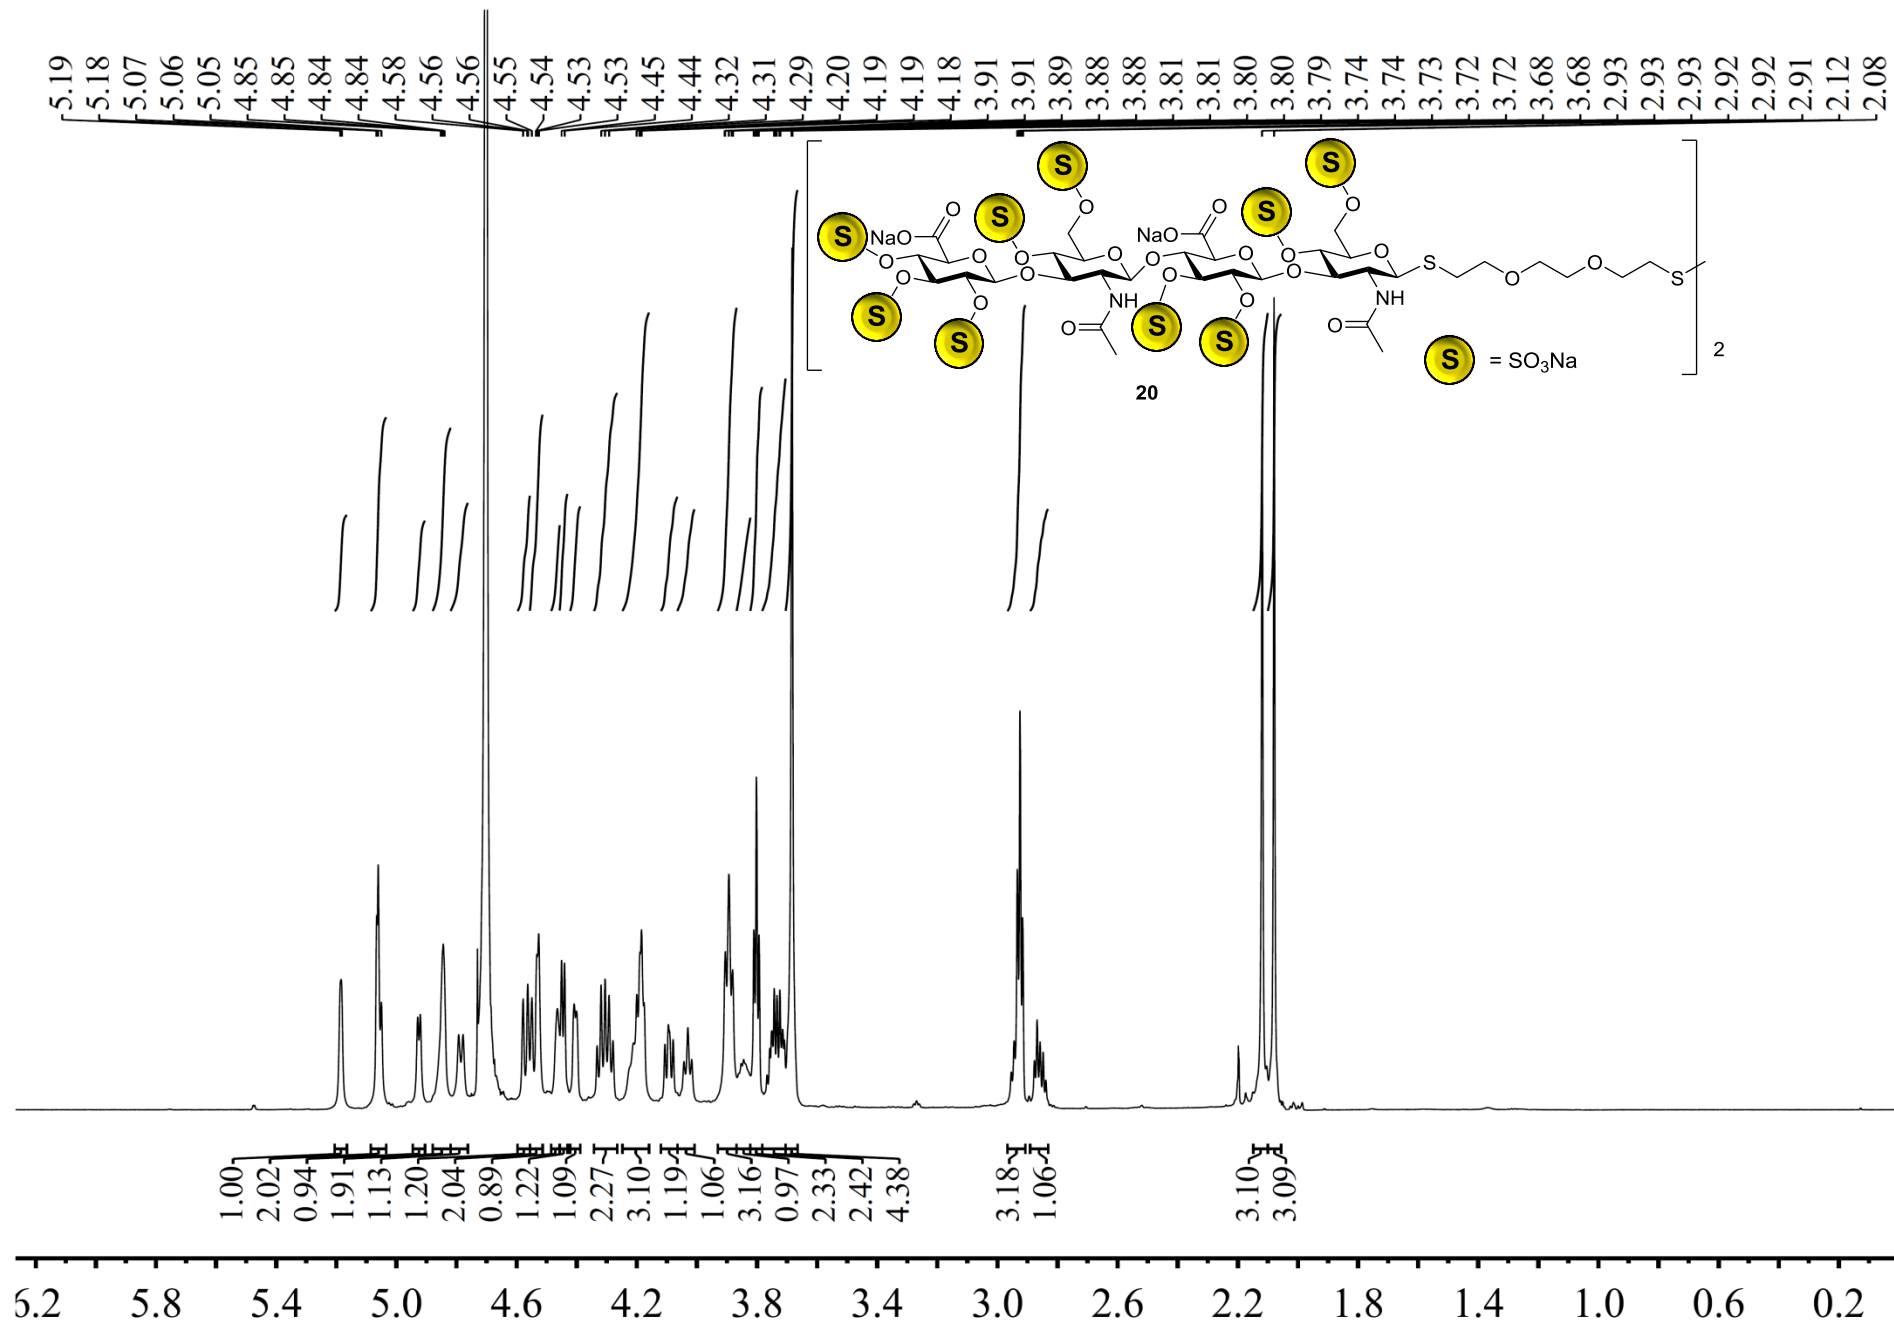

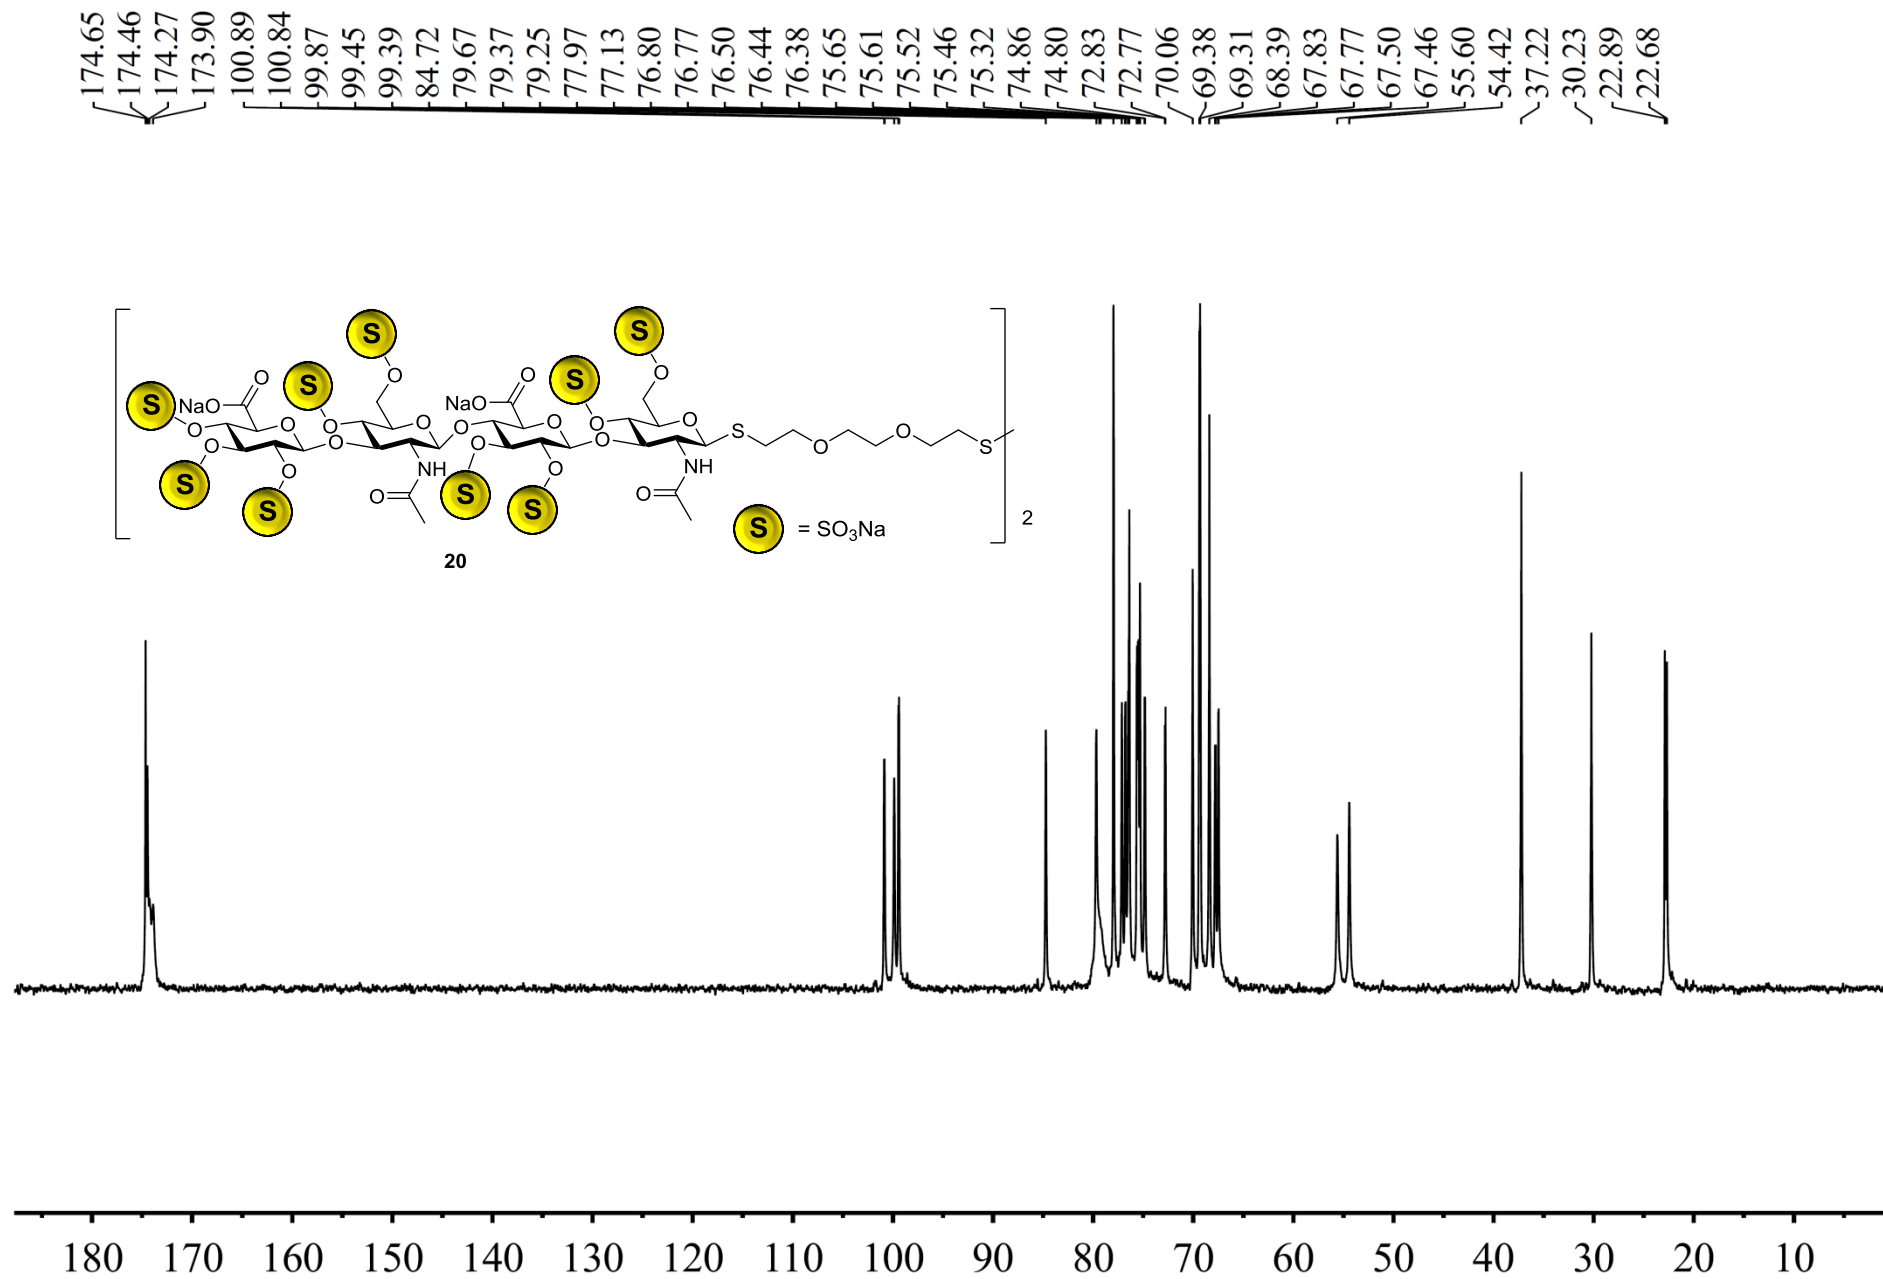

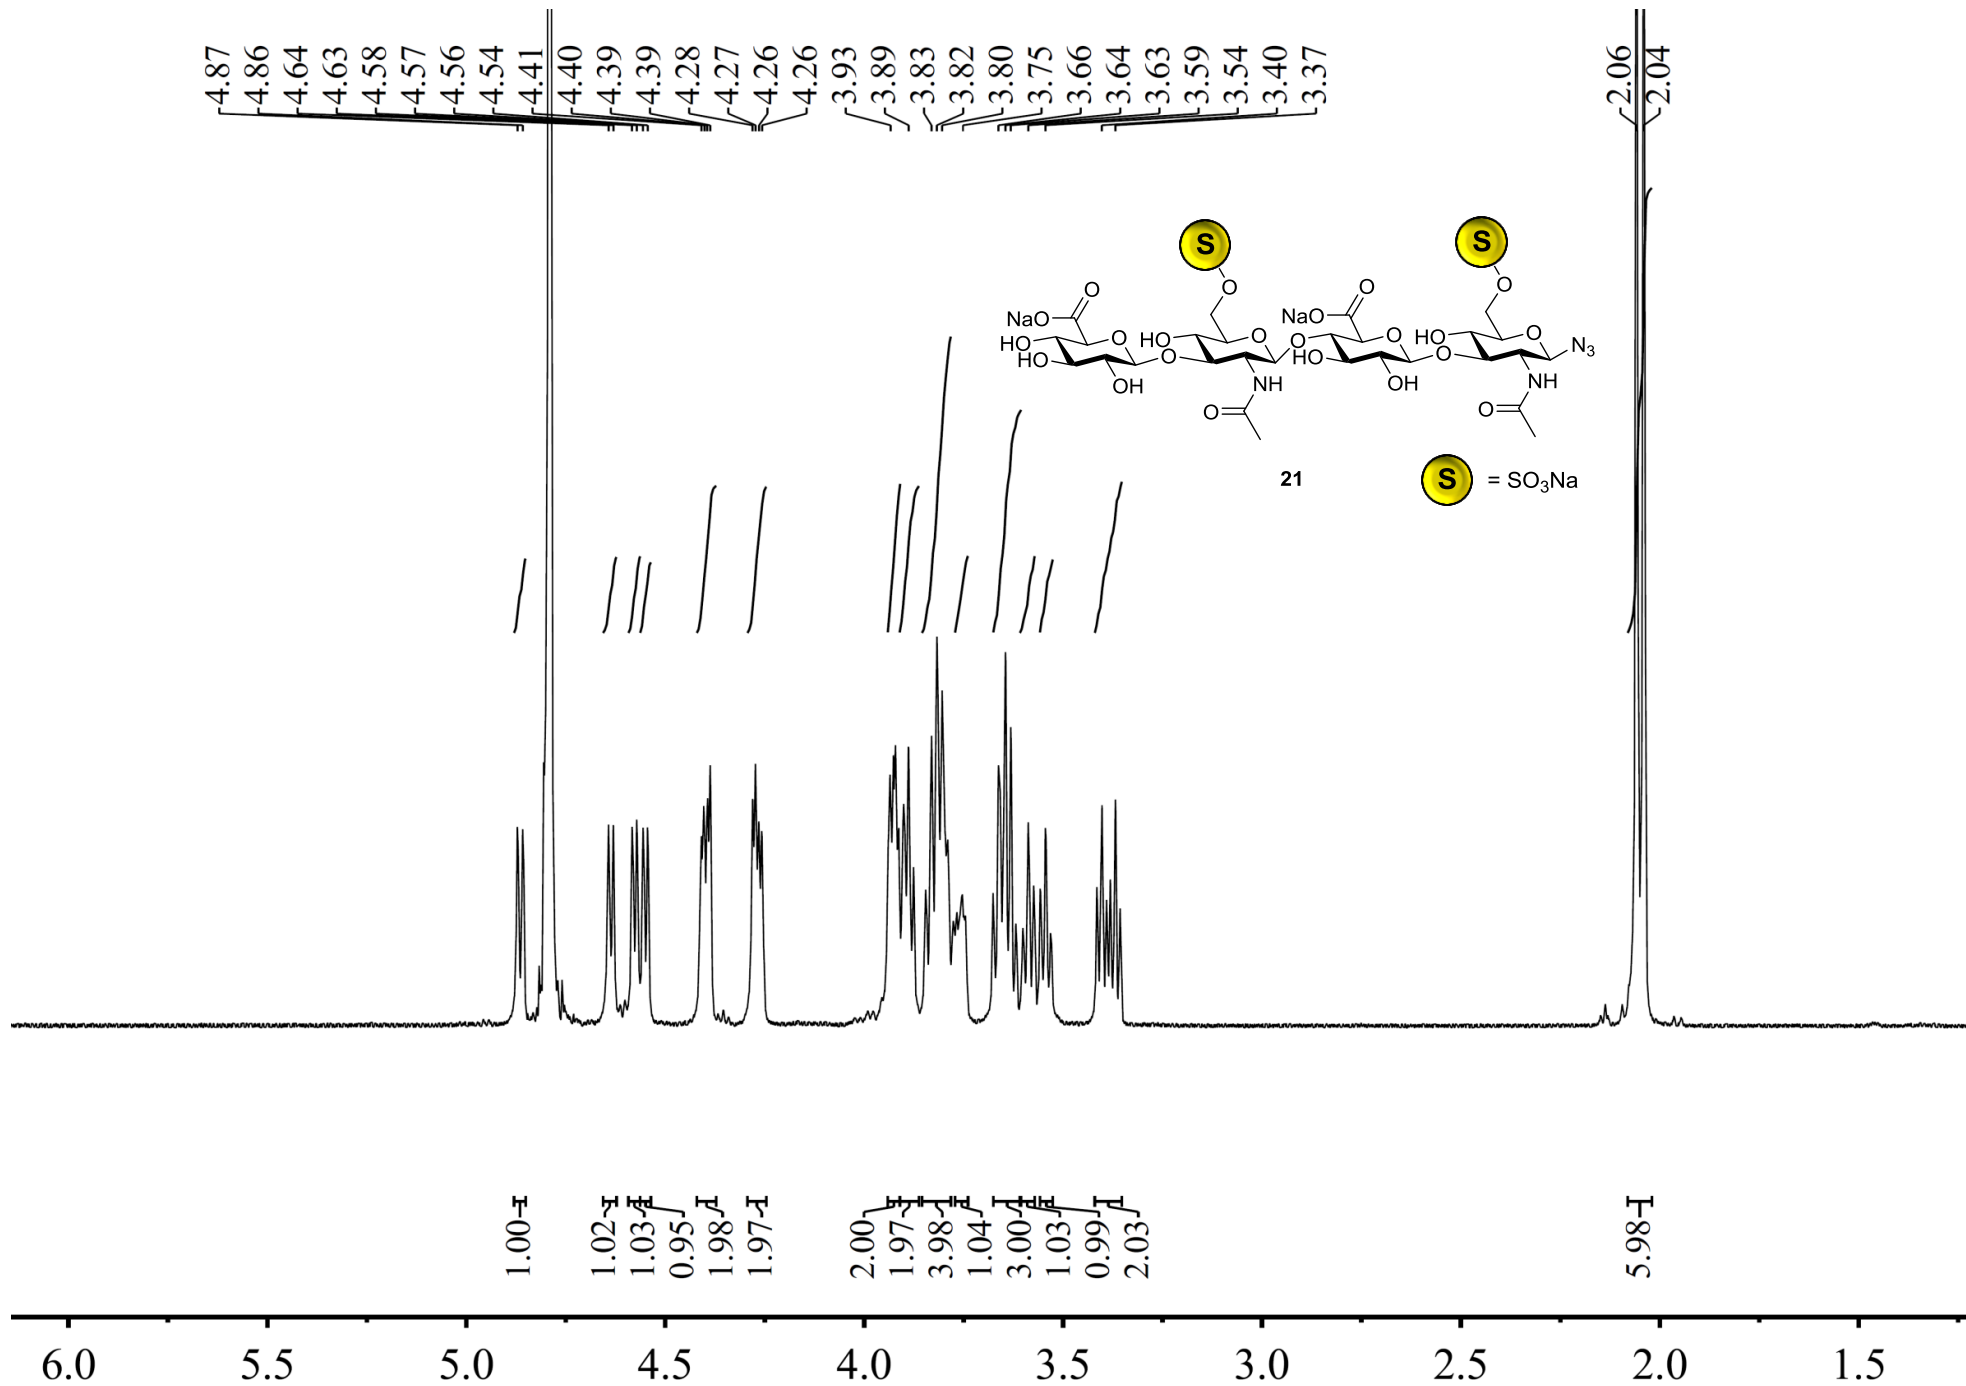

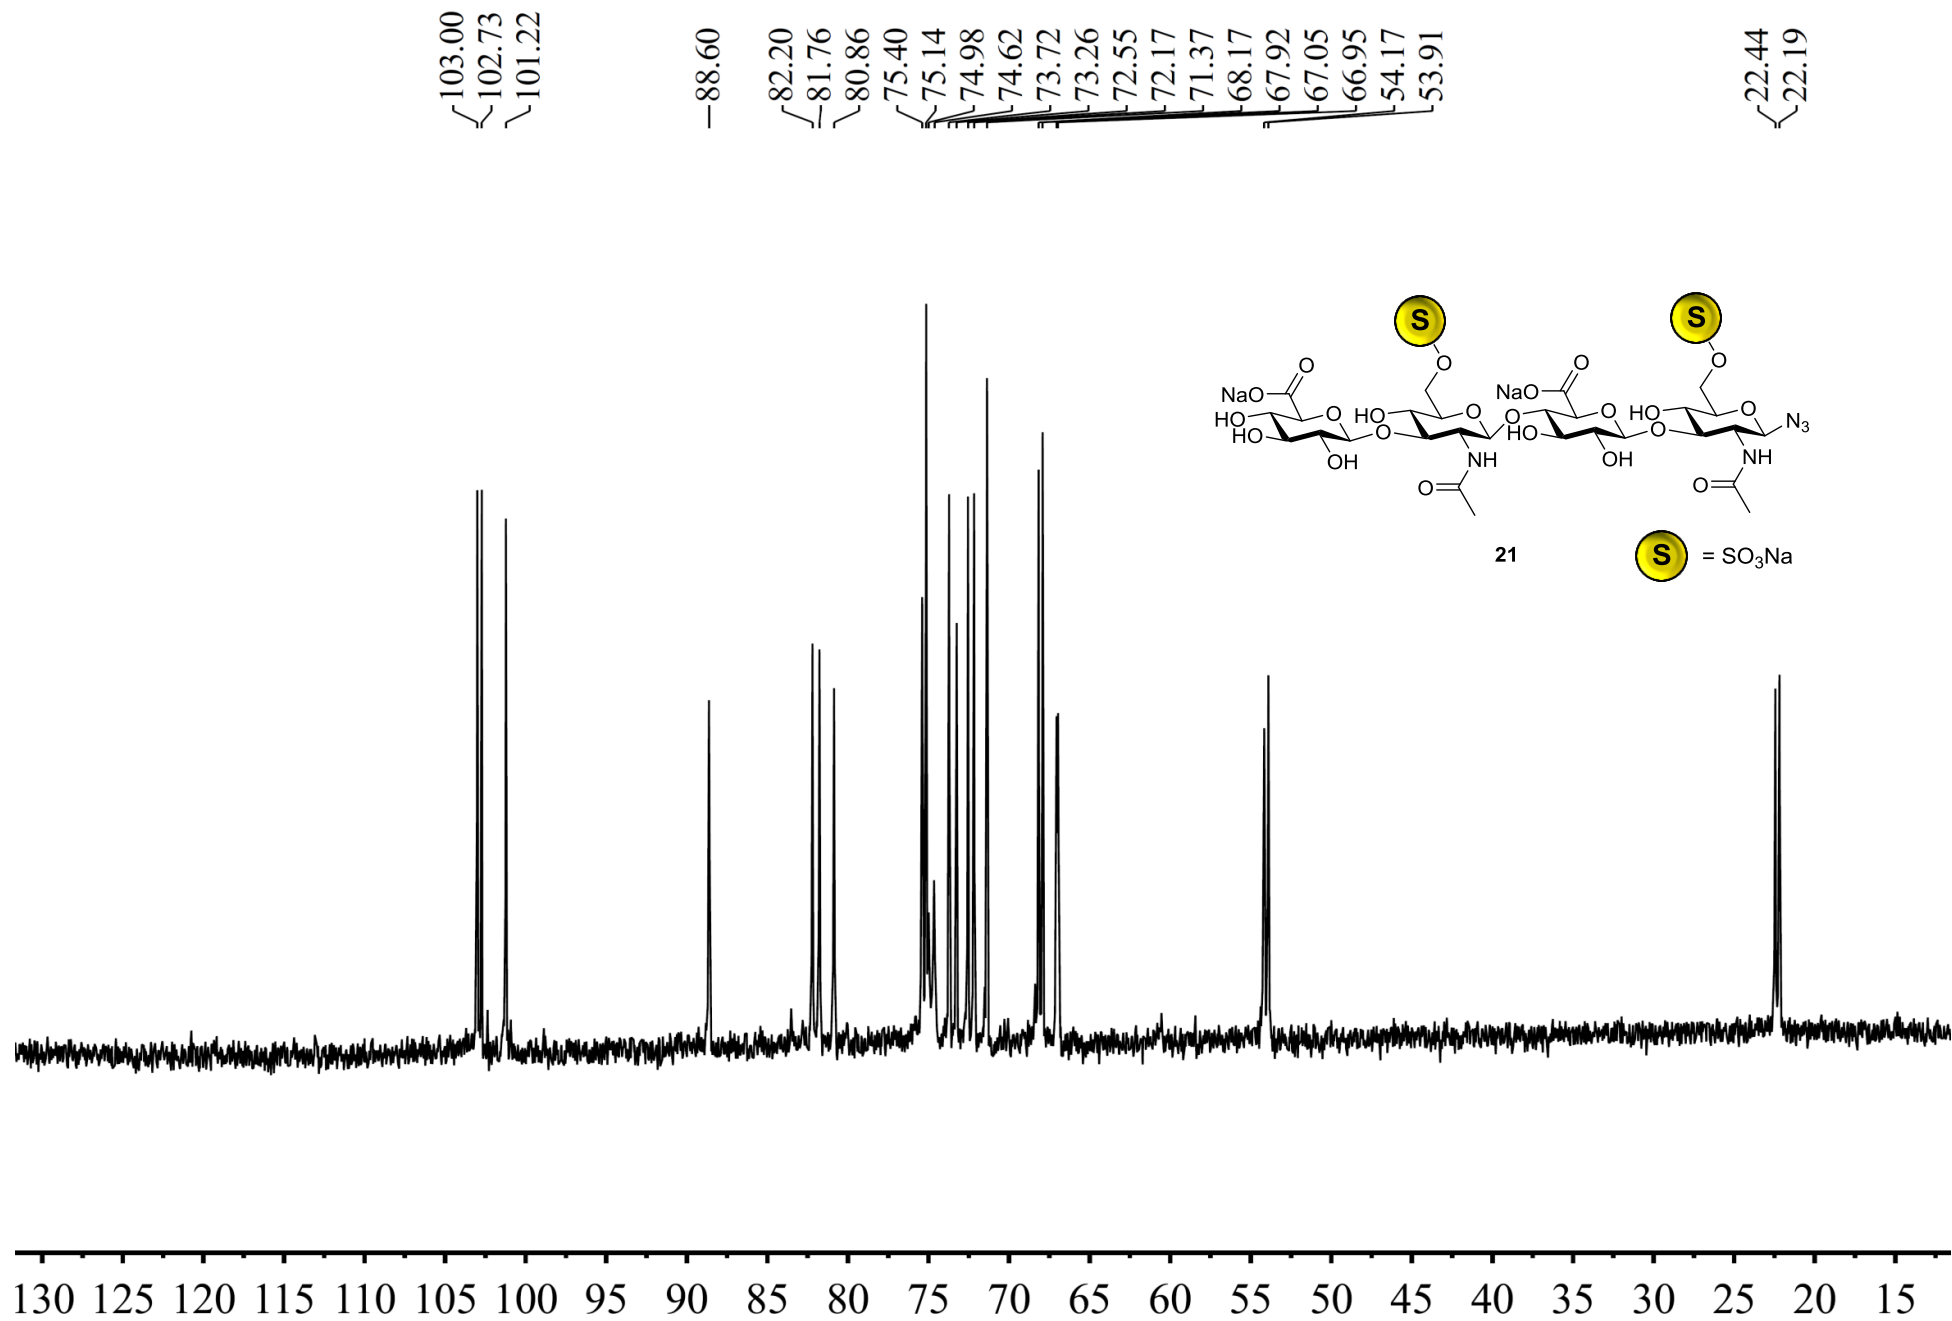

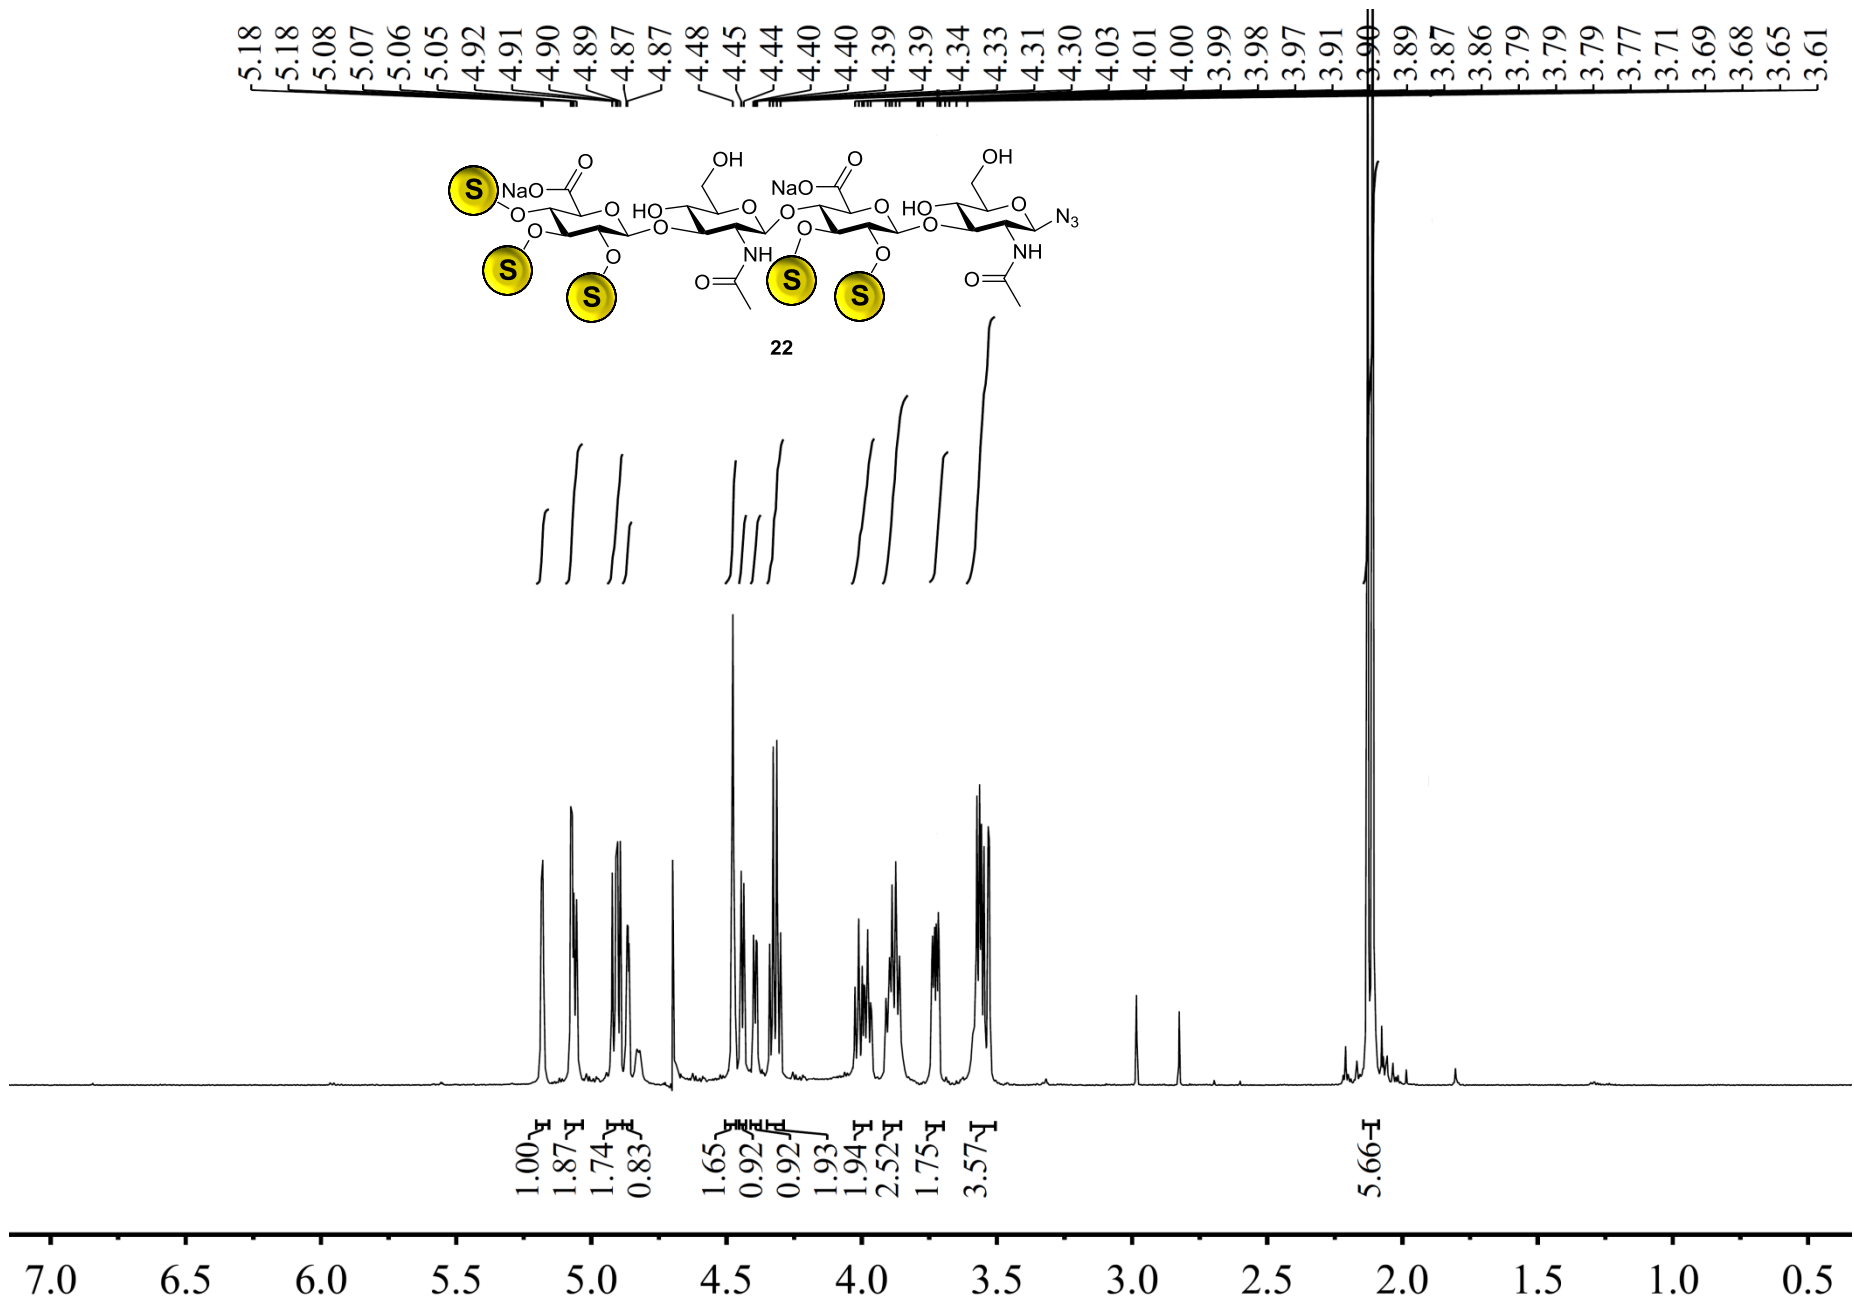



181.09  
174.98  
174.74  
174.30

100.58  
100.16  
99.30

88.31  
79.54  
78.70  
77.95  
76.87  
75.47  
75.13  
74.64  
69.07  
68.68  
60.59  
55.61  
54.47

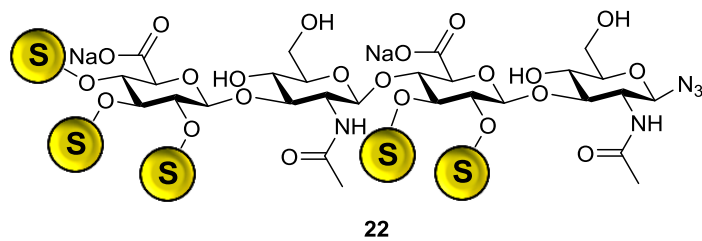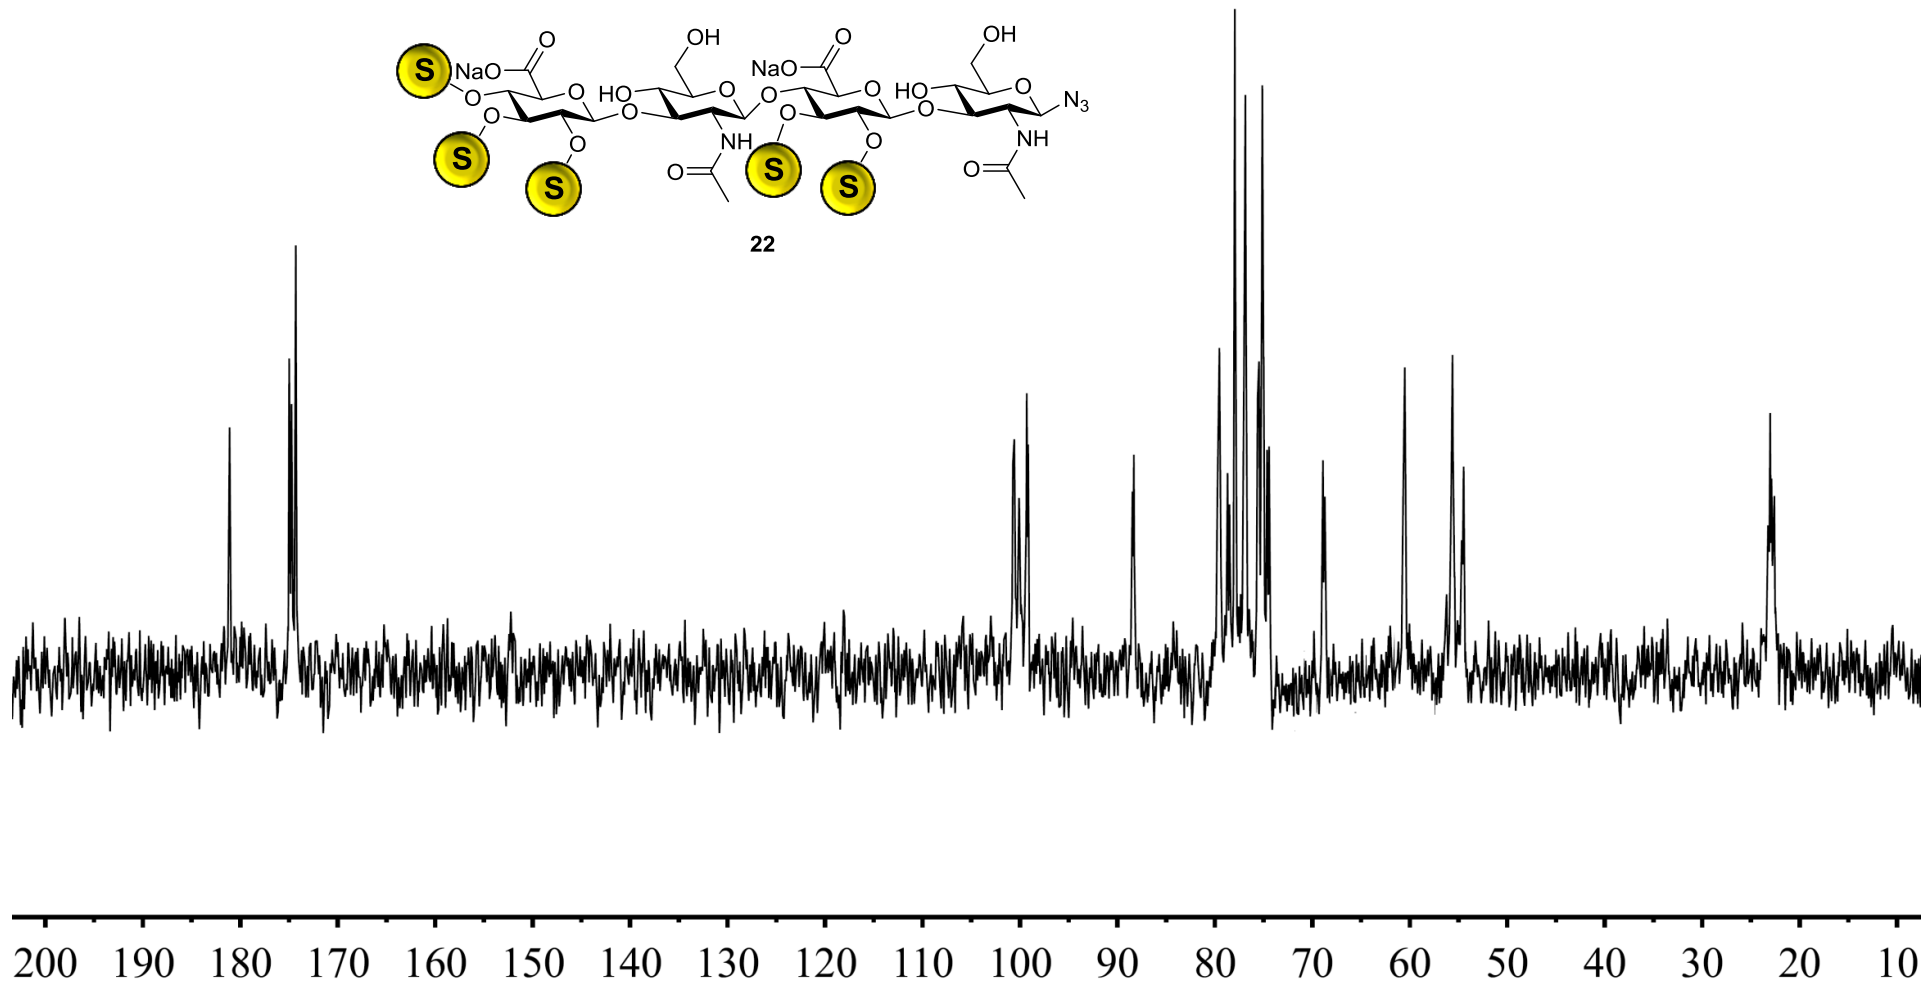

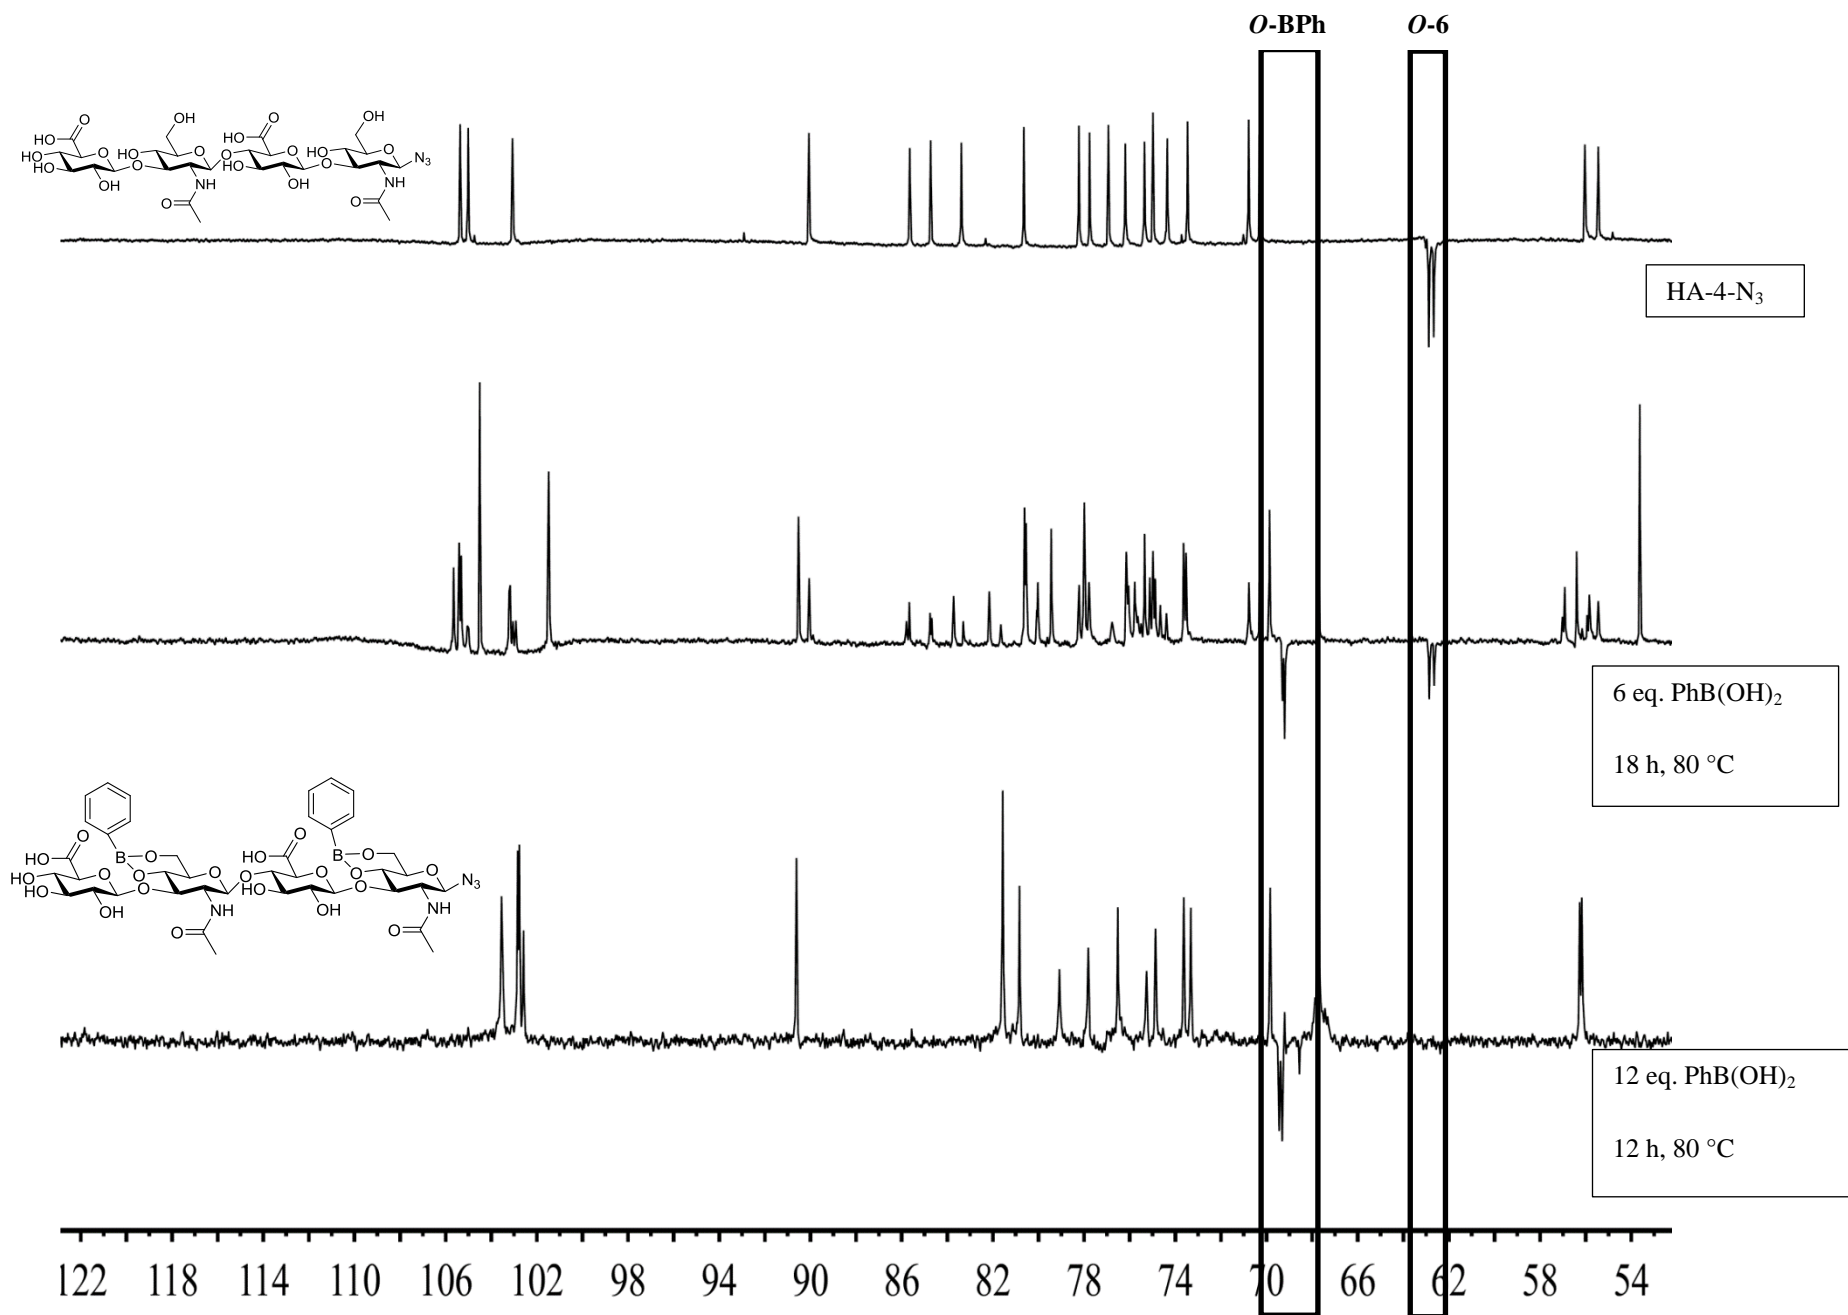

**Figure S1:** Monitored progress of O-4,6 protection of tetrahyaluronan azide 5 with successively added phenyl boronic acid.

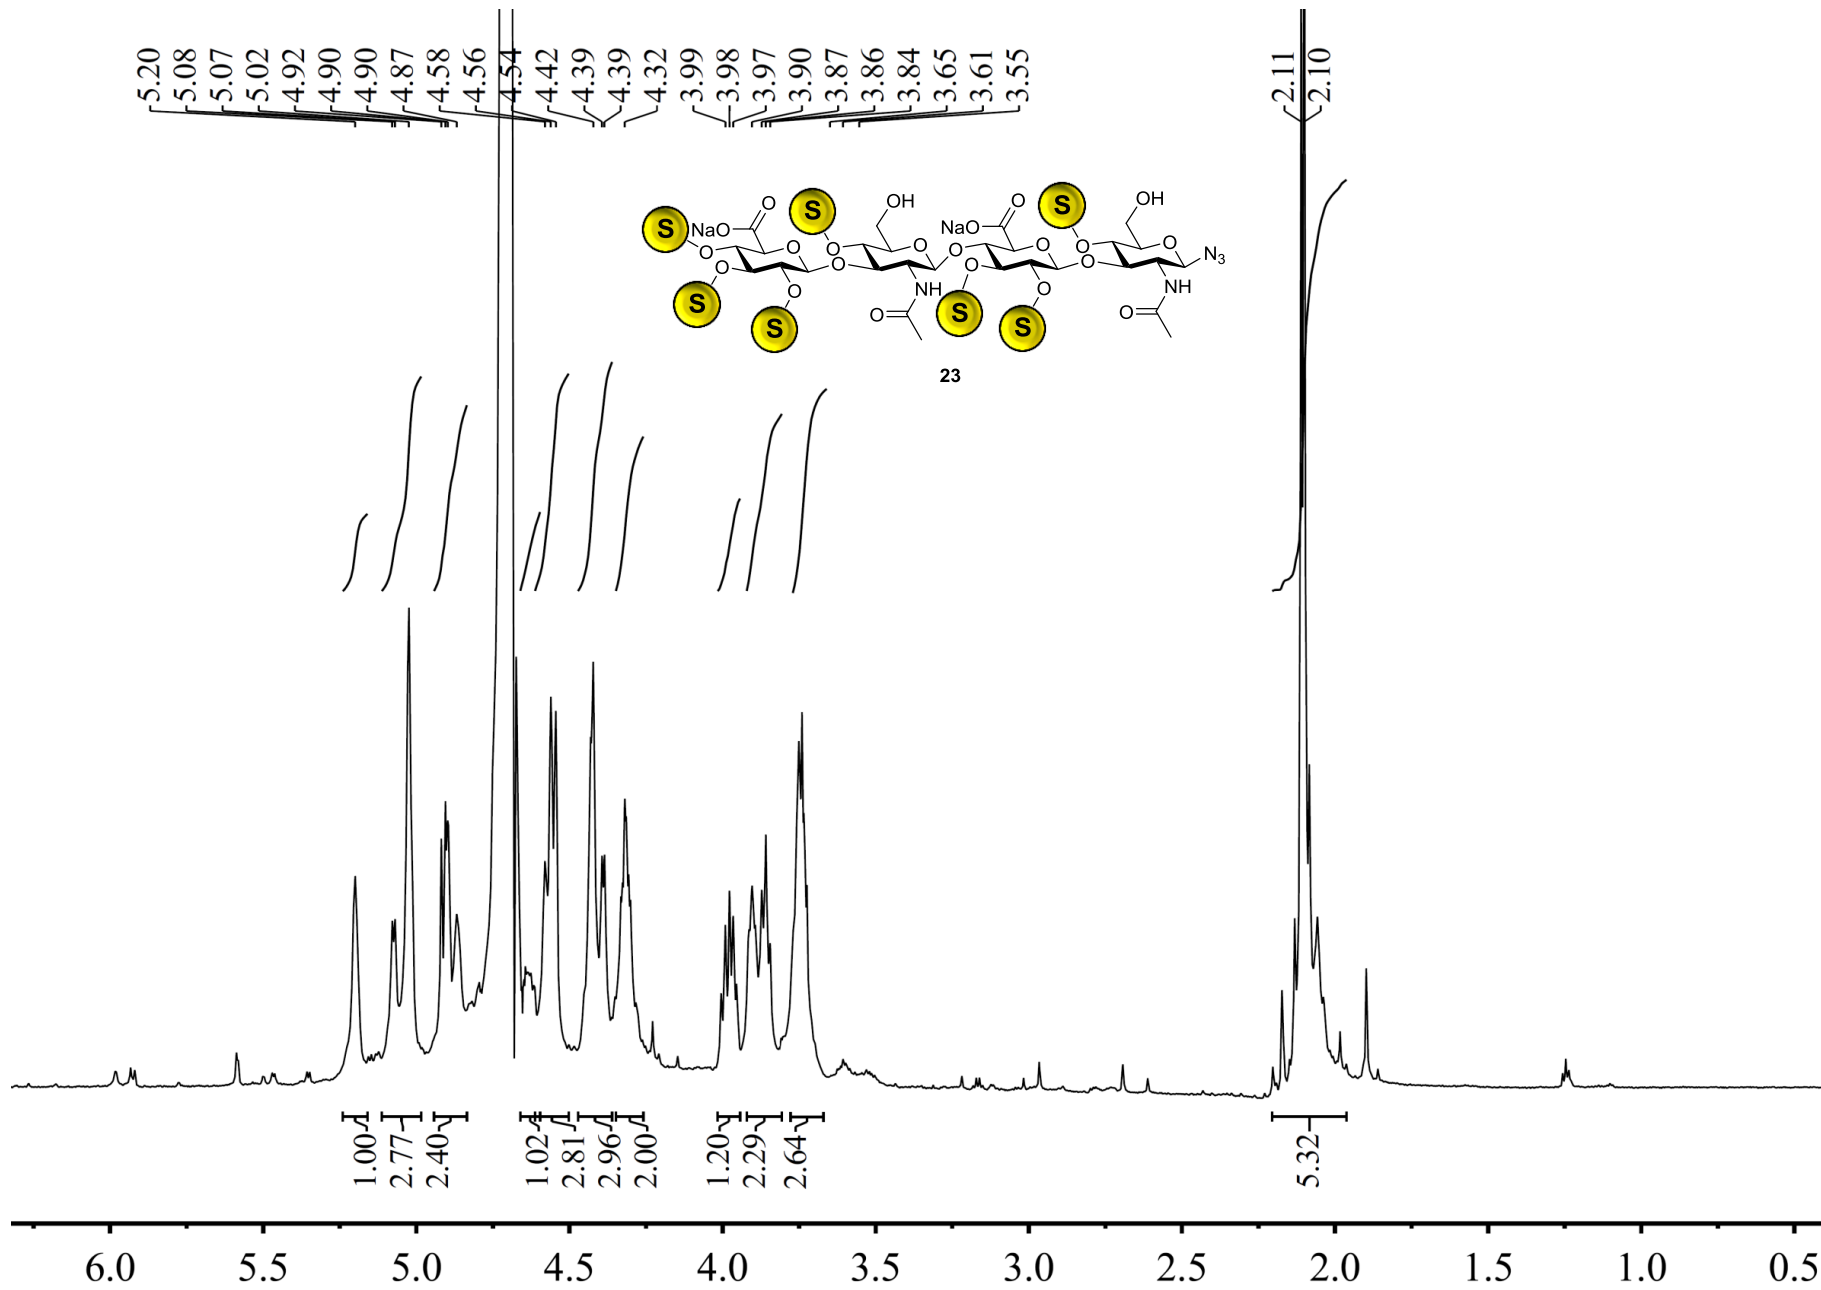

175.02  
174.34  
171.79  
171.51

100.36  
100.04  
99.35

88.29  
78.94  
77.76  
76.41  
75.80  
75.17  
74.60  
74.09  
72.93  
60.99  
55.42  
54.47

22.81  
22.57

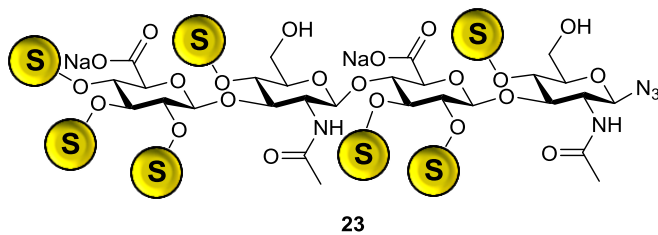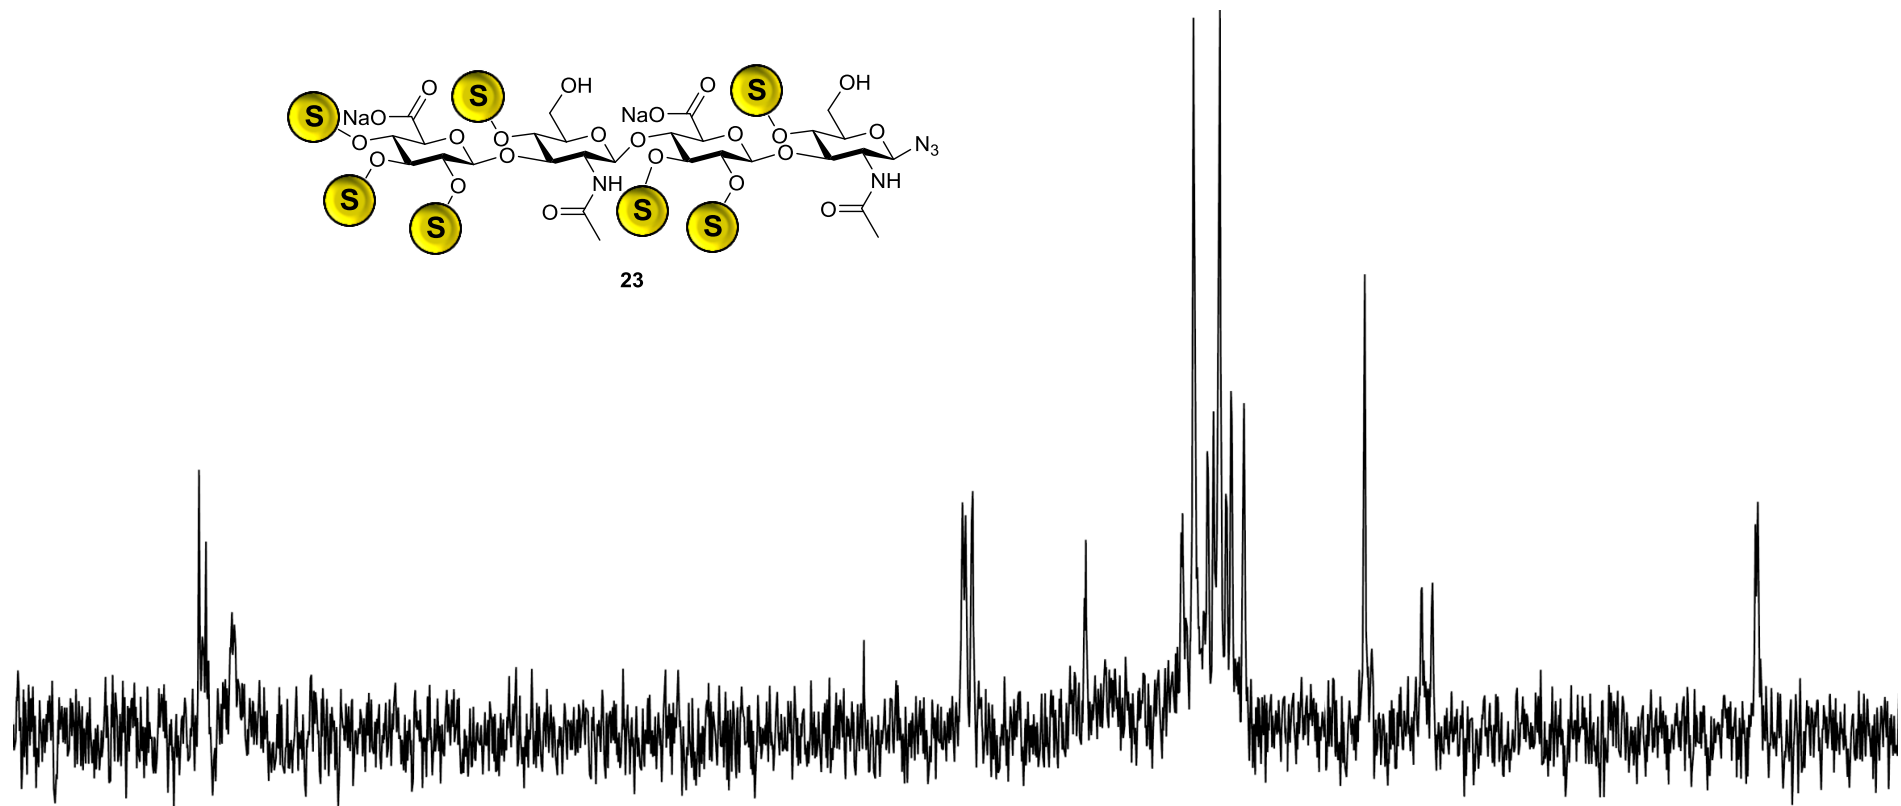

190 180 170 160 150 140 130 120 110 100 90 80 70 60 50 40 30 20 10

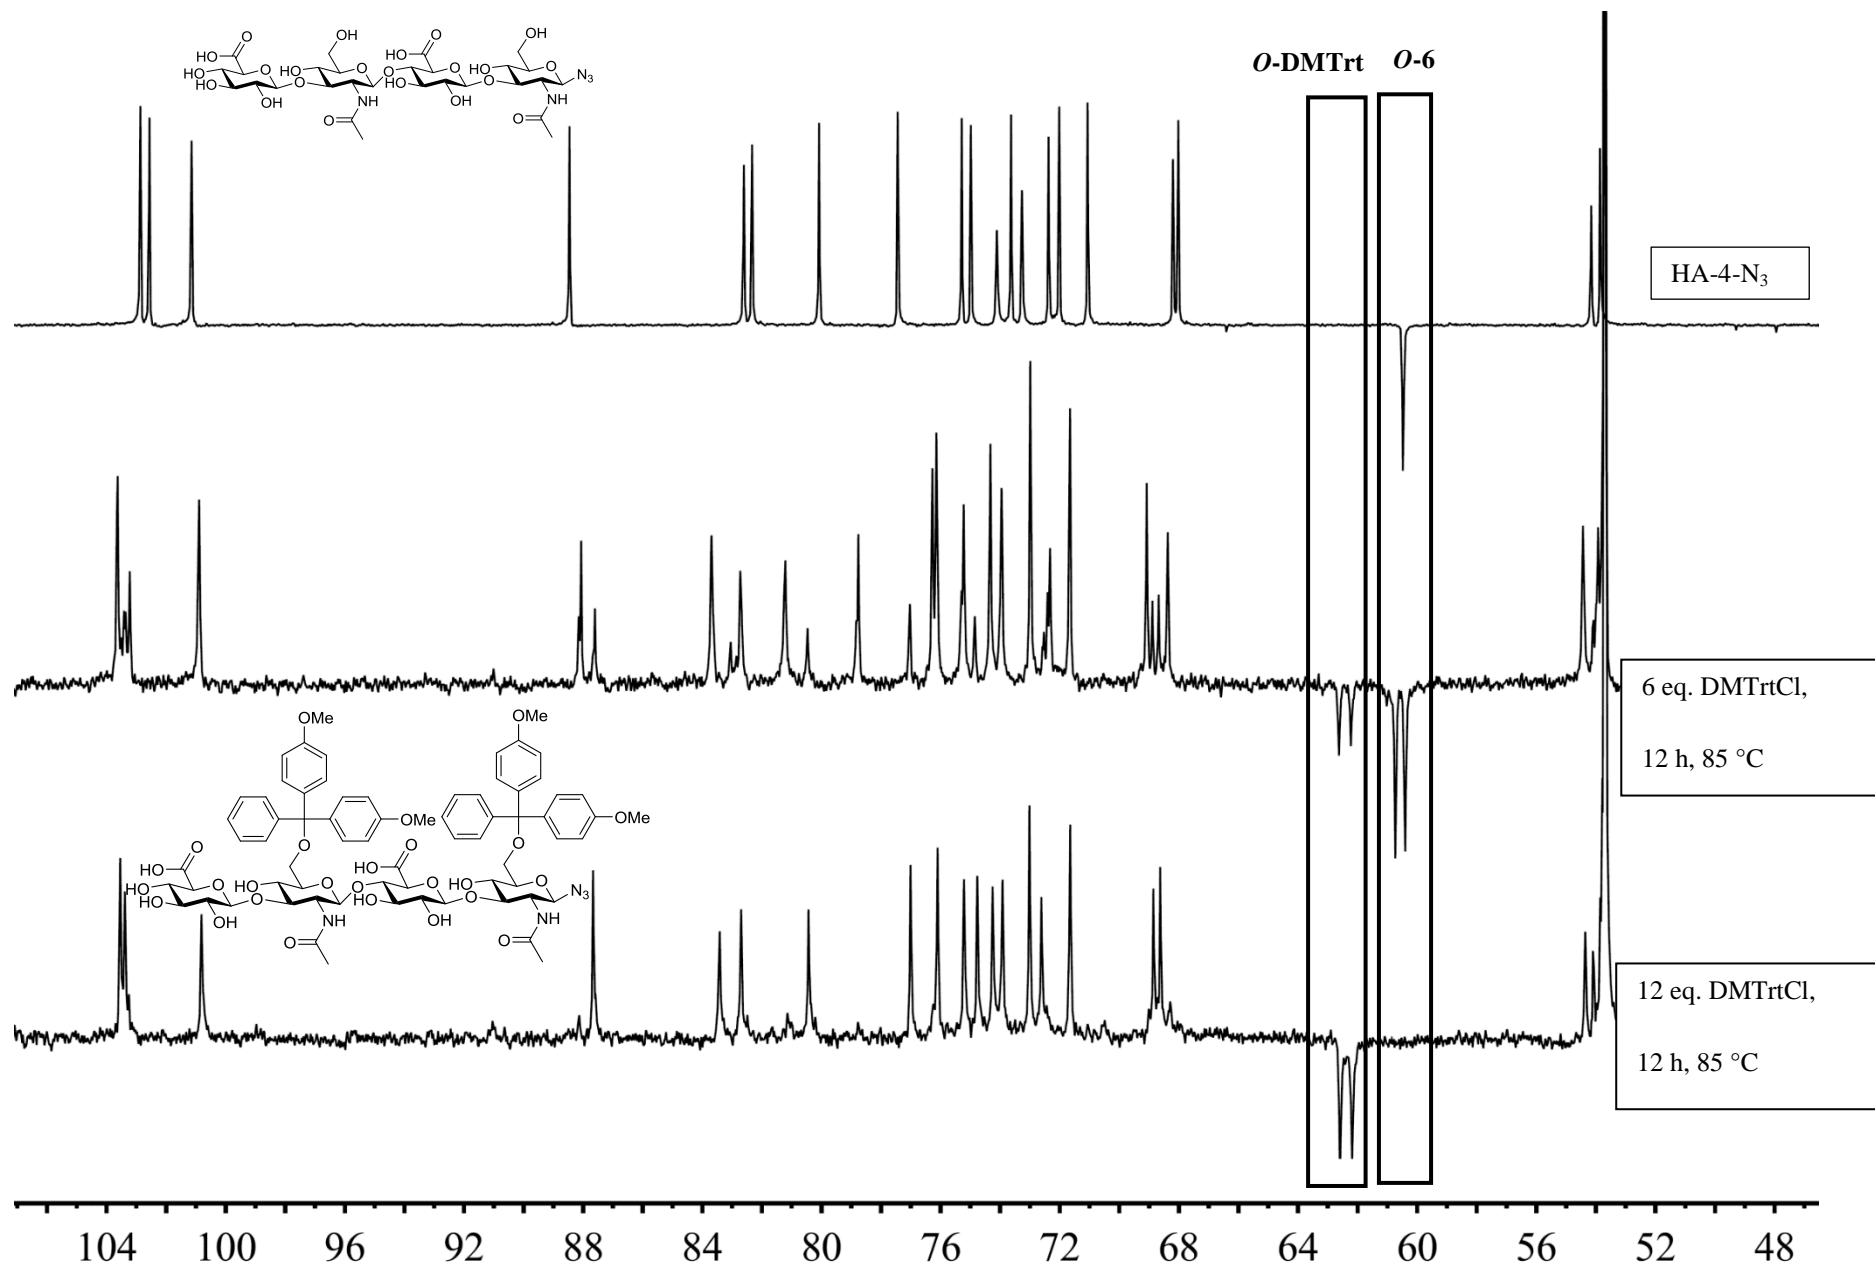

**Figure S2:** Monitored progress of O-6 protection of tetrahyaluronan azide 5 with with successively added dimethoxytrityl chloride.

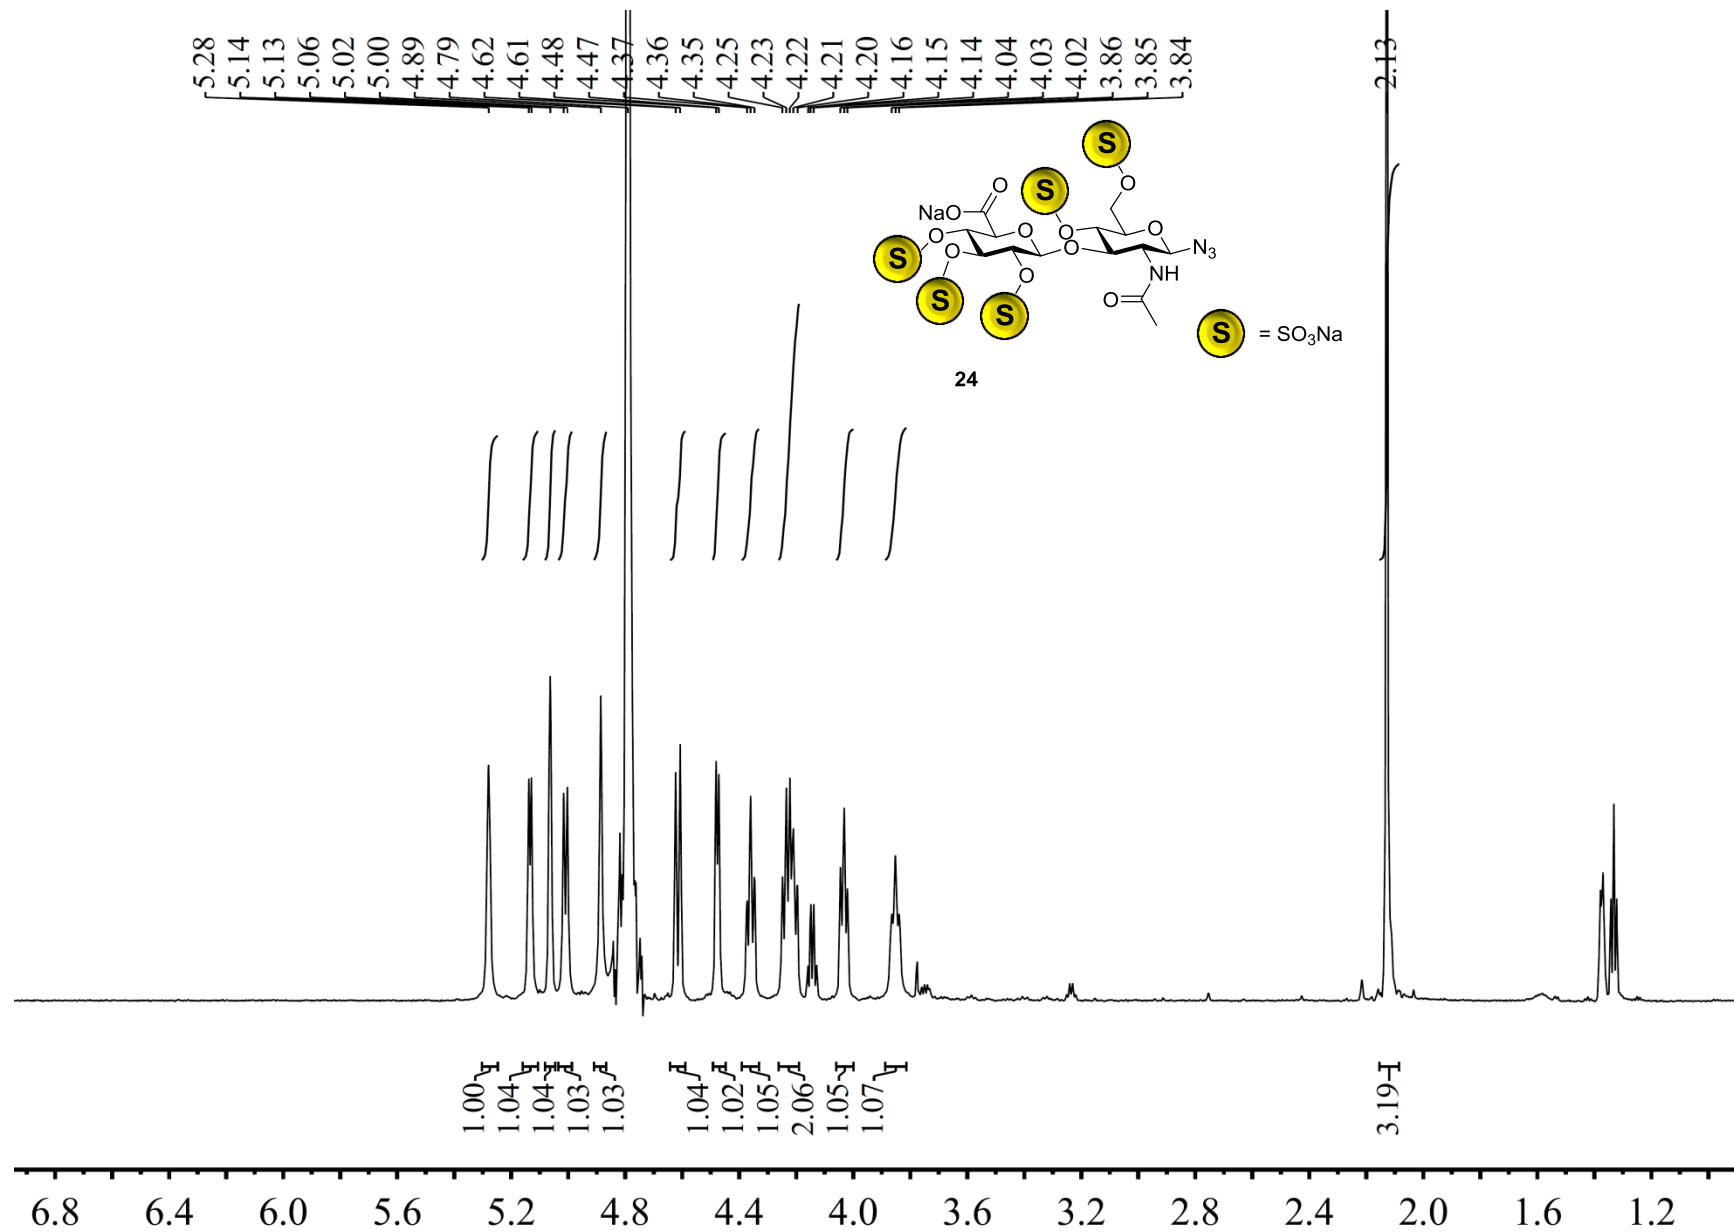

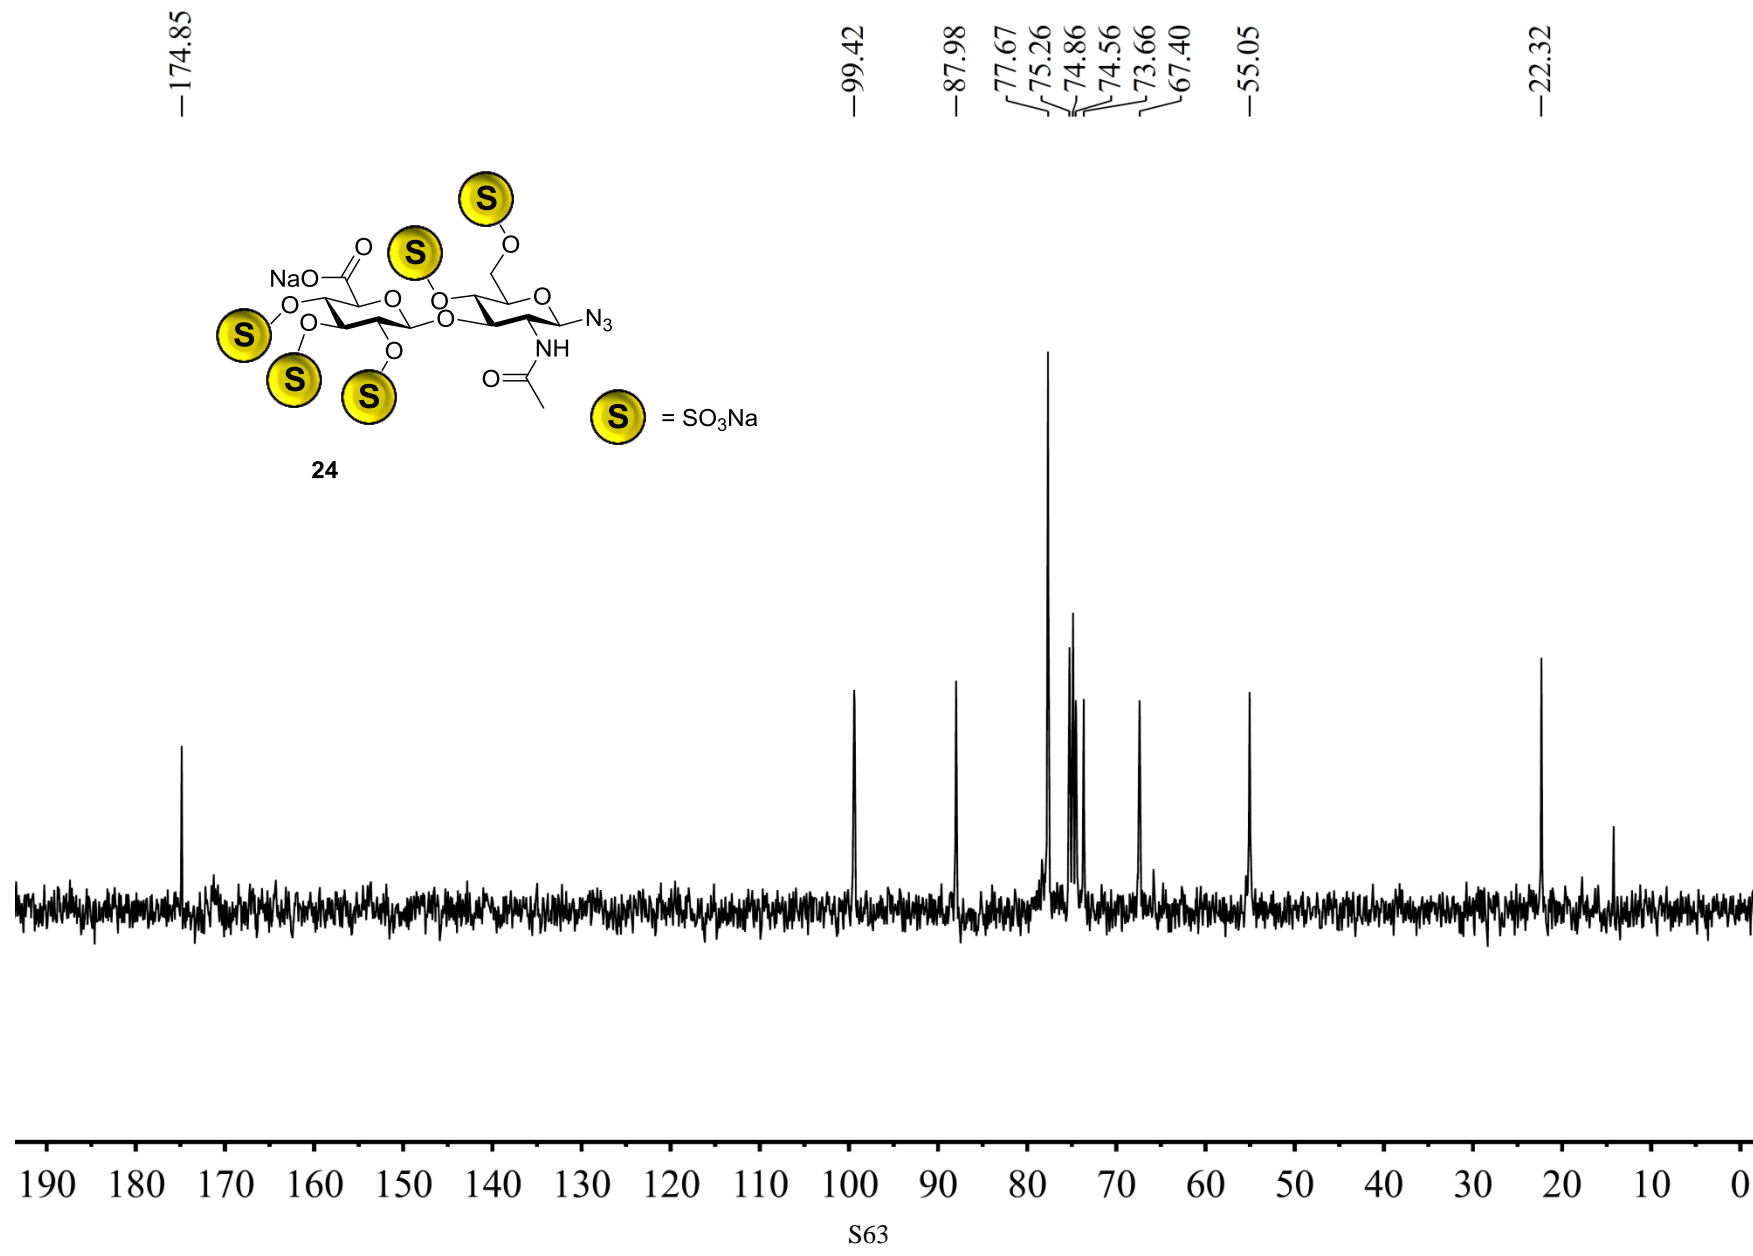

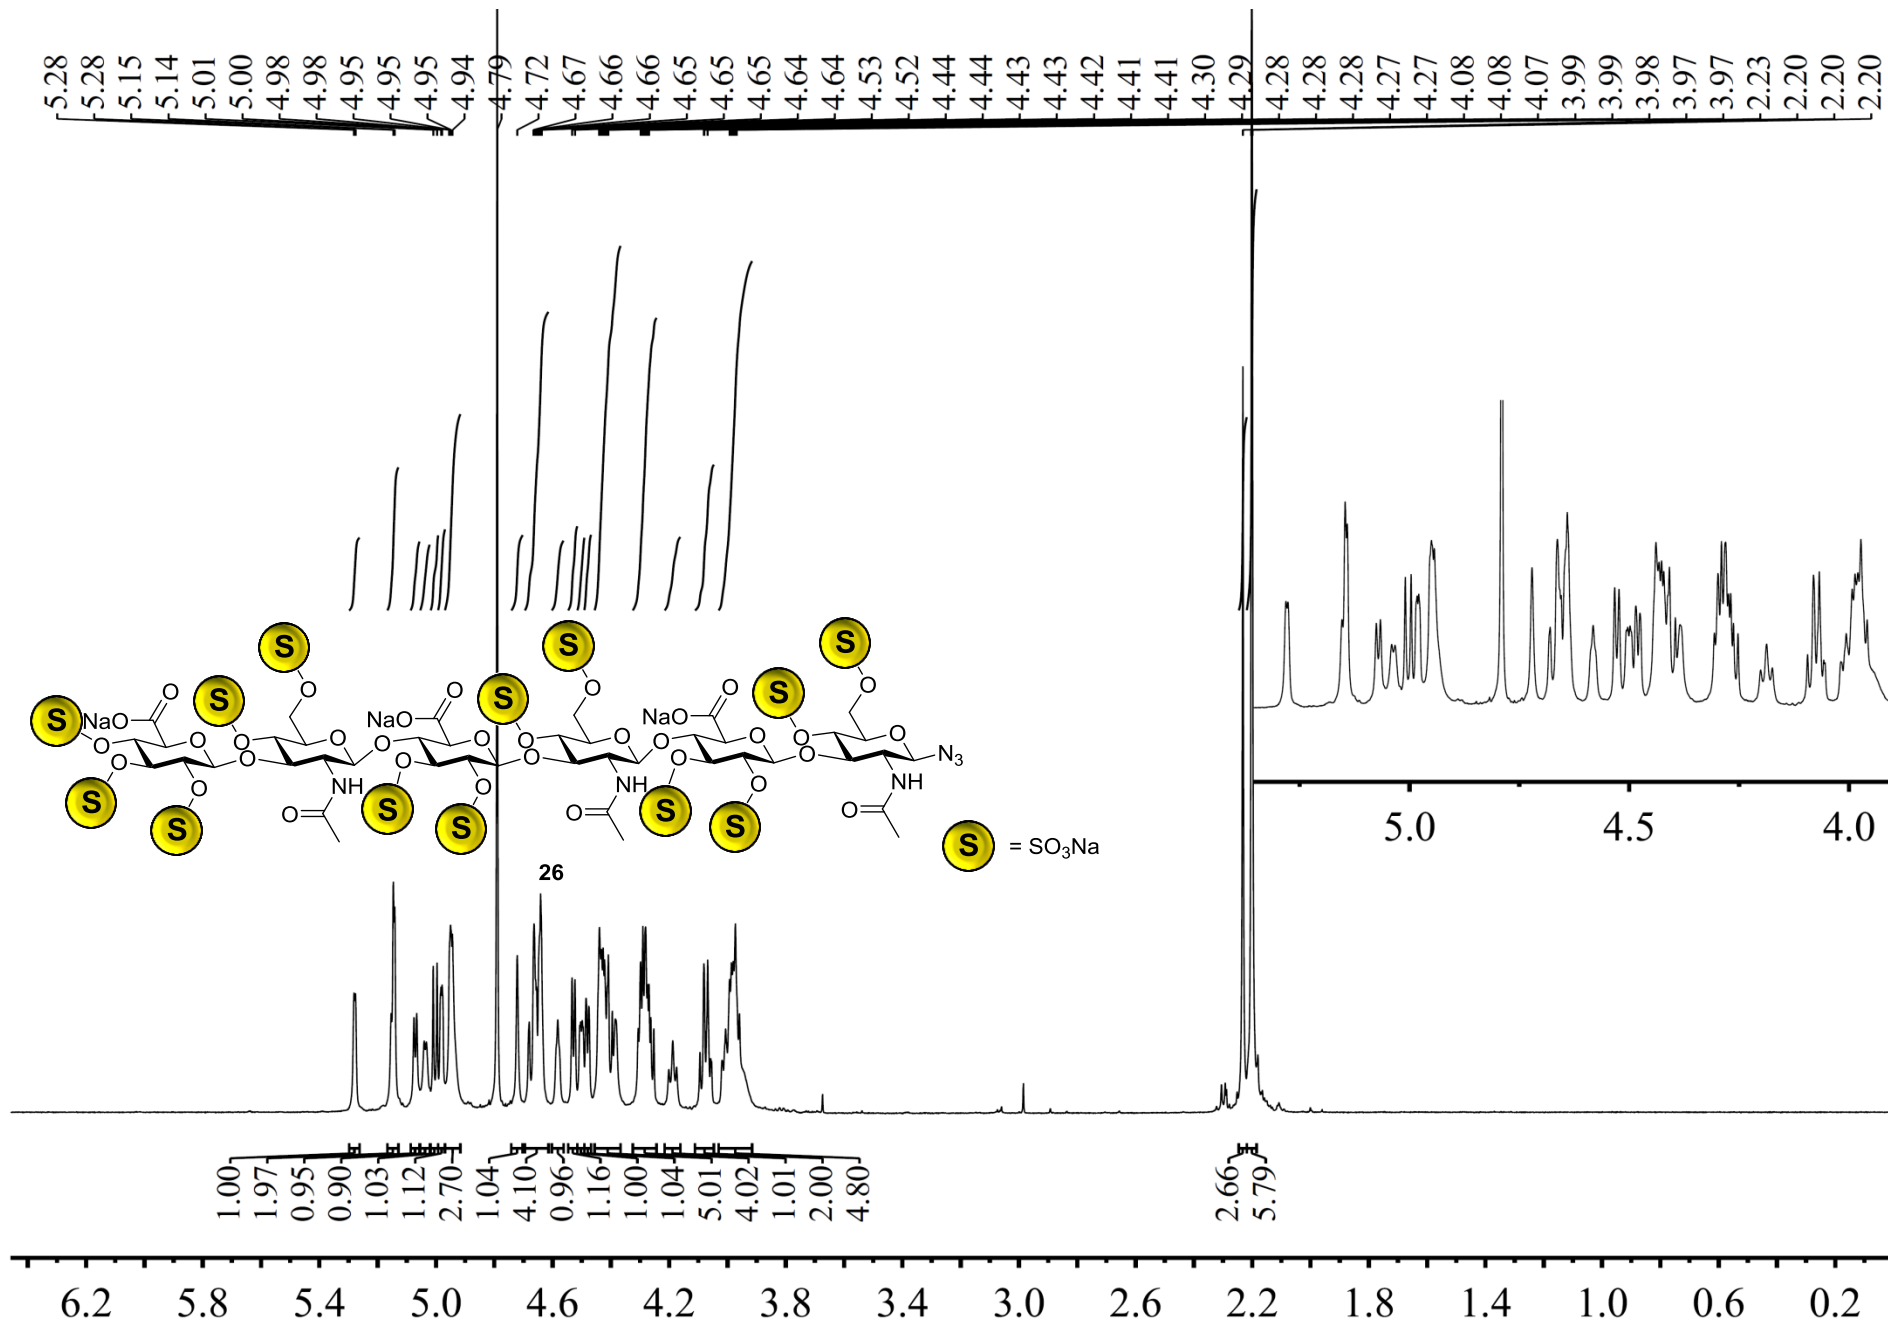



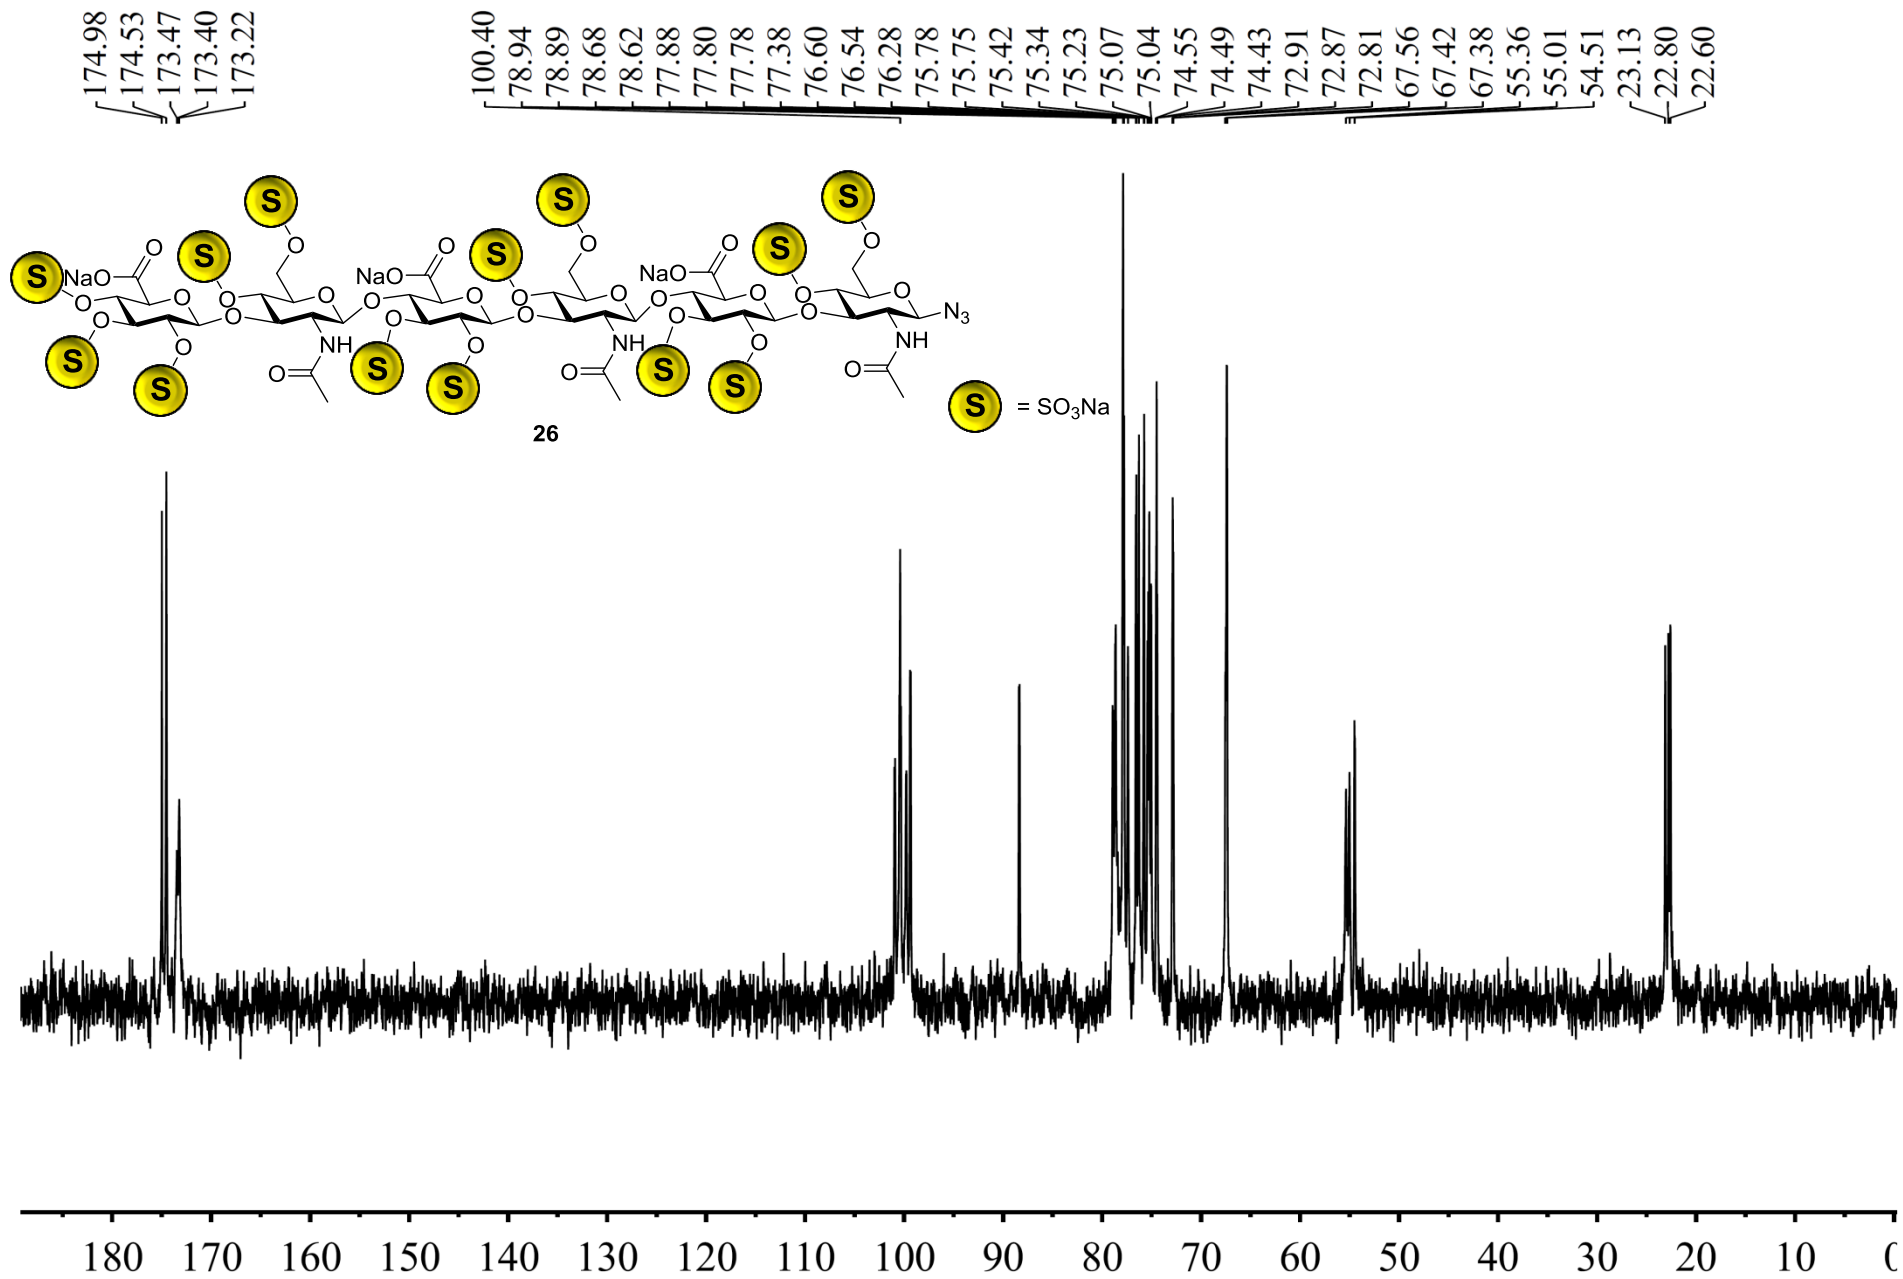

## MS-Analysis of defined sulfated compounds

All signals with relative intensities about 10% were considered for the assignment. The most significant signal for the intact product is marked in the mass spectra and the corresponding alignment table with a black border. Asterisk (\*) marks unsigned signals.

### 9s-HA-4-TAMRA (15)

Assignment positive ion mode M ( $C_{56}H_{68}N_8O_{53}S_9$ ) = 1988.04

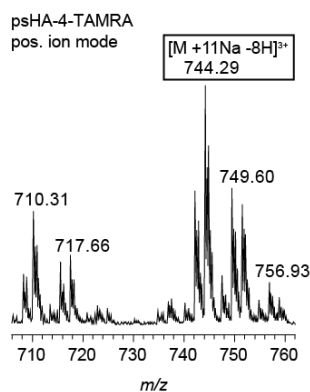

| m/z    | z | I        | M neutral | assignment                                  | Hill Notation                      | calc. mass |
|--------|---|----------|-----------|---------------------------------------------|------------------------------------|------------|
| 744.29 | 3 | 18539120 | 2229.87   | [M+11Na-8H] <sup>3+</sup>                   | $C_{56}H_{57}N_8Na_{11}O_{53}S_9$  | 2229.84    |
| 749.60 | 3 | 10376376 | 2245.80   | [M+10Na+K-8H] <sup>3+</sup>                 | $C_{56}H_{57}KN_8Na_{10}O_{53}S_9$ | 2245.81    |
| 742.29 | 3 | 10202585 | 2223.87   | [M+9Na+K-7H] <sup>3+</sup>                  | $C_{56}H_{58}KN_8Na_9O_{53}S_9$    | 2223.83    |
| 751.61 | 3 | 8965715  | 2251.83   | [M+12Na-9H] <sup>3+</sup>                   | $C_{56}H_{56}N_8Na_{12}O_{53}S_9$  | 2251.82    |
| 710.31 | 3 | 8791755  | 2127.93   | [M-SO <sub>3</sub> +10Na-7H] <sup>3+</sup>  | $C_{56}H_{58}N_8Na_{10}O_{50}S_8$  | 2127.90    |
| 717.65 | 3 | 5211279  | 2149.95   | [M-SO <sub>3</sub> +11Na-8H] <sup>3+</sup>  | $C_{56}H_{57}N_8Na_{11}O_{50}S_8$  | 3149.88    |
| 715.64 | 3 | 4742634  | 2143.92   | [M-SO <sub>3</sub> +9Na+K-7H] <sup>3+</sup> | $C_{56}H_{58}KN_8Na_9O_{50}S_8$    | 2143.87    |
| 708.32 | 3 | 3857570  | 2121.96   | [M-SO <sub>3</sub> +8Na+K-6H] <sup>3+</sup> | $C_{56}H_{59}KN_8Na_8O_{50}S_8$    | 2121.89    |
| 747.61 | 3 | 3506916  | 2239.83   | [M+8Na+2K-7H] <sup>3+</sup>                 | $C_{56}H_{58}K_2N_8Na_8O_{53}S_9$  | 2239.80    |
| 756.92 | 3 | 3242149  | 2267.76   | [M+11Na+K-9H] <sup>3+</sup>                 | $C_{56}H_{56}KN_8Na_{11}O_{53}S_9$ | 2267.79    |
| 758.93 | 3 | 2182586  | 2273.79   | [M+13Na-10H] <sup>3+</sup>                  | $C_{56}H_{55}N_8Na_{13}O_{53}S_9$  | 2273.80    |
| 754.92 | 3 | 1896999  | 2261.76   | [M+9Na+2K-8H] <sup>3+</sup>                 | $C_{56}H_{57}K_2N_8Na_9O_{53}S_9$  | 2261.79    |
| 736.95 | 3 | 1824411  | 2207.85   | [M+10Na-7H] <sup>3+</sup>                   | $C_{56}H_{58}N_8Na_{10}O_{53}S_9$  | 2207.86    |

### 9s-HA-4-Triazol (16)

Assignment positive ion mode M ( $C_{30}H_{45}N_5O_{49}S_9$ ) = 1546.87

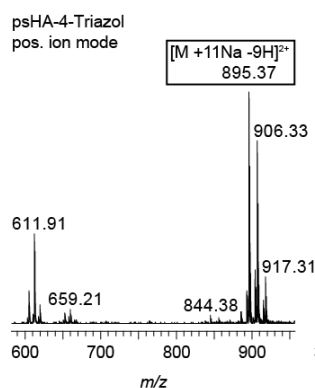

| m/z    | z | I      | M neutral | assignment                   | Hill Notation                      | calc. Mass |
|--------|---|--------|-----------|------------------------------|------------------------------------|------------|
| 895.37 | 2 | 310938 | 1788.74   | [M+11Na-9H] <sup>2+</sup>    | $C_{30}H_{34}N_5Na_{11}O_{49}S_9$  | 1788.67    |
| 906.33 | 2 | 245677 | 1810.66   | [M+12Na-10H] <sup>2+</sup>   | $C_{30}H_{33}N_5Na_{12}O_{49}S_9$  | 1810.65    |
| 611.91 | 3 | 120812 | 1832.73   | [M+13Na-10H] <sup>3+</sup>   | $C_{30}H_{32}N_5Na_{13}O_{49}S_9$  | 1832.63    |
| 903.32 | 2 | 71294  | 1804.64   | [M+10Na+K-9H] <sup>2+</sup>  | $C_{30}H_{34}KN_5Na_{10}O_{49}S_9$ | 1804.64    |
| 917.31 | 2 | 61245  | 1832.62   | [M+13Na-11H] <sup>2+</sup>   | $C_{30}H_{32}N_5Na_{13}O_{49}S_9$  | 1832.63    |
| 307.30 | 1 | 57615  | 306.30    | *                            |                                    |            |
| 892.34 | 2 | 44134  | 1782.68   | [M+9Na+K-8H] <sup>2+</sup>   | $C_{30}H_{35}KN_5Na_9O_{49}S_9$    | 1782.66    |
| 604.58 | 3 | 43494  | 1810.74   | [M+12Na-9H] <sup>3+</sup>    | $C_{30}H_{33}N_5Na_{12}O_{49}S_9$  | 1810.65    |
| 914.32 | 2 | 31673  | 1826.64   | [M+11Na+K-10H] <sup>2+</sup> | $C_{30}H_{33}KN_5Na_{11}O_{49}S_9$ | 1826.62    |

### 9s-HA-4-SMe (17)

psHA-4-SMe  
pos. ion mode

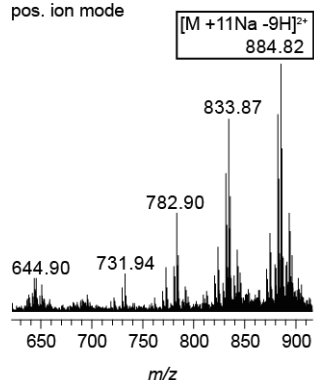

Assignment positive ion mode M (C<sub>29</sub>H<sub>46</sub>N<sub>2</sub>O<sub>49</sub>S<sub>10</sub>) = 1525.84

| m/z    | z | I       | M neutral | assignment                                   | Hillnotation                                                                                                  | calc mass |
|--------|---|---------|-----------|----------------------------------------------|---------------------------------------------------------------------------------------------------------------|-----------|
| 884.81 | 2 | 1357741 | 1767.62   | [M+11Na-9H] <sup>2+</sup>                    | C <sub>29</sub> H <sub>35</sub> N <sub>2</sub> Na <sub>11</sub> O <sub>49</sub> S <sub>10</sub>               | 1767.64   |
| 833.87 | 2 | 1186271 | 1665.74   | [M-SO <sub>3</sub> +10Na-8H] <sup>2+</sup>   | C <sub>29</sub> H <sub>36</sub> N <sub>2</sub> Na <sub>10</sub> O <sub>46</sub> S <sub>9</sub>                | 1665.70   |
| 881.81 | 2 | 1077695 | 1761.62   | [M+9Na+K-8H] <sup>2+</sup>                   | C <sub>29</sub> H <sub>36</sub> KN <sub>2</sub> Na <sub>9</sub> O <sub>49</sub> S <sub>10</sub>               | 1761.63   |
| 830.86 | 2 | 687050  | 1659.72   | [M-SO <sub>3</sub> +8Na+K-7H] <sup>2+</sup>  | C <sub>29</sub> H <sub>37</sub> KN <sub>2</sub> Na <sub>8</sub> O <sub>46</sub> S <sub>9</sub>                | 1659.69   |
| 782.89 | 2 | 546818  | 1563.78   | [M-2SO <sub>3</sub> +9Na-7H] <sup>2+</sup>   | C <sub>29</sub> H <sub>37</sub> N <sub>2</sub> Na <sub>9</sub> O <sub>43</sub> S <sub>8</sub>                 | 1563.76   |
| 892.79 | 2 | 539397  | 1783.58   | [M+10Na+K-9H] <sup>2+</sup>                  | C <sub>29</sub> H <sub>35</sub> KN <sub>2</sub> Na <sub>10</sub> O <sub>49</sub> S <sub>10</sub>              | 1783.61   |
| 873.82 | 2 | 410516  | 1745.64   | [M+10Na-8H] <sup>2+</sup>                    | C <sub>29</sub> H <sub>36</sub> N <sub>2</sub> Na <sub>10</sub> O <sub>49</sub> S <sub>10</sub>               | 1745.66   |
| 878.82 | 2 | 344834  | 1755.64   | [M+7Na+2K-7H] <sup>2+</sup>                  | C <sub>29</sub> H <sub>37</sub> K <sub>2</sub> N <sub>2</sub> Na <sub>7</sub> O <sub>49</sub> S <sub>10</sub> | 1755.62   |
| 895.83 | 2 | 343000  | 1789.66   | [M+12Na-10H] <sup>2+</sup>                   | C <sub>29</sub> H <sub>34</sub> N <sub>2</sub> Na <sub>12</sub> O <sub>49</sub> S <sub>10</sub>               | 1789.62   |
| 822.88 | 2 | 313784  | 1643.76   | [M-SO <sub>3</sub> +9Na-7H] <sup>2+</sup>    | C <sub>29</sub> H <sub>37</sub> N <sub>2</sub> Na <sub>9</sub> O <sub>46</sub> S <sub>9</sub>                 | 1643.72   |
| 841.83 | 2 | 293989  | 1681.66   | [M-SO <sub>3</sub> +9Na+K-8H] <sup>2+</sup>  | C <sub>29</sub> H <sub>36</sub> KN <sub>2</sub> Na <sub>9</sub> O <sub>46</sub> S <sub>9</sub>                | 1681.67   |
| 779.90 | 2 | 292403  | 1557.80   | [M-2SO <sub>3</sub> +7Na+K-6H] <sup>2+</sup> | C <sub>29</sub> H <sub>38</sub> KN <sub>2</sub> Na <sub>7</sub> O <sub>43</sub> S <sub>8</sub>                | 1557.75   |
| 844.85 | 2 | 265025  | 1687.70   | [M-SO <sub>3</sub> +11Na-9H] <sup>2+</sup>   | C <sub>29</sub> H <sub>35</sub> N <sub>2</sub> Na <sub>11</sub> O <sub>46</sub> S <sub>9</sub>                | 1687.68   |
| 819.89 | 2 | 261780  | 1637.78   | [M-SO <sub>3</sub> +7Na+K-6H] <sup>2+</sup>  | C <sub>29</sub> H <sub>38</sub> KN <sub>2</sub> Na <sub>7</sub> O <sub>46</sub> S <sub>9</sub>                | 1637.71   |
| 771.90 | 2 | 252117  | 1541.80   | [M-2SO <sub>3</sub> +8Na-6H] <sup>2+</sup>   | C <sub>29</sub> H <sub>38</sub> N <sub>2</sub> Na <sub>8</sub> O <sub>43</sub> S <sub>8</sub>                 | 1541.78   |
| 332.42 | 1 | 250697  | 331.42    | *                                            |                                                                                                               |           |
| 595.54 | 3 | 246709  | 1783.62   | [M+10Na+K-8H] <sup>3+</sup>                  | C <sub>29</sub> H <sub>35</sub> KN <sub>2</sub> Na <sub>10</sub> O <sub>49</sub> S <sub>10</sub>              | 1783.61   |
| 889.80 | 2 | 241443  | 1777.60   | [M+8Na+2K-7H] <sup>2+</sup>                  | C <sub>29</sub> H <sub>36</sub> K <sub>2</sub> N <sub>2</sub> Na <sub>8</sub> O <sub>49</sub> S <sub>10</sub> | 1777.61   |
| 870.84 | 2 | 234000  | 1739.68   | [M+8Na+K-7H] <sup>2+</sup>                   | C <sub>29</sub> H <sub>37</sub> KN <sub>2</sub> Na <sub>8</sub> O <sub>49</sub> S <sub>10</sub>               | 1739.65   |
| 838.85 | 2 | 214583  | 1675.70   | [M-SO <sub>3</sub> +8Na+K-7H] <sup>2+</sup>  | C <sub>29</sub> H <sub>37</sub> KN <sub>2</sub> Na <sub>8</sub> O <sub>46</sub> S <sub>9</sub>                | 1675.67   |
| 642.90 | 3 | 197990  | 1925.70   | *                                            |                                                                                                               |           |
| 597.57 | 3 | 197355  | 1789.71   | [M+12Na-9H] <sup>3+</sup>                    | C <sub>29</sub> H <sub>34</sub> N <sub>2</sub> Na <sub>12</sub> O <sub>49</sub> S <sub>10</sub>               | 1789.62   |
| 644.87 | 3 | 195085  | 1931.61   | *                                            |                                                                                                               |           |
| 952.77 | 2 | 191228  | 1903.54   | *                                            |                                                                                                               |           |
| 900.79 | 2 | 159456  | 1799.58   | [M+9Na+2K-9H] <sup>2+</sup>                  | C <sub>29</sub> H <sub>35</sub> K <sub>2</sub> N <sub>2</sub> Na <sub>9</sub> O <sub>49</sub> S <sub>10</sub> | 1799.59   |
| 731.93 | 2 | 142165  | 1461.86   | [M-3SO <sub>3</sub> +8Na-6H] <sup>2+</sup>   | C <sub>29</sub> H <sub>38</sub> N <sub>2</sub> Na <sub>8</sub> O <sub>40</sub> S <sub>7</sub>                 | 1461.82   |
| 604.89 | 3 | 140446  | 1811.67   | [M+13Na-10H] <sup>3+</sup>                   | C <sub>29</sub> H <sub>33</sub> N <sub>2</sub> Na <sub>13</sub> O <sub>49</sub> S <sub>10</sub>               | 1811.60   |
| 955.76 | 2 | 134694  | 1909.52   | *                                            |                                                                                                               |           |
| 861.84 | 2 | 131311  | 1721.68   | [M+8Na+K-H <sub>2</sub> O-7H] <sup>2+</sup>  | C <sub>29</sub> H <sub>35</sub> KN <sub>2</sub> Na <sub>8</sub> O <sub>48</sub> S <sub>10</sub>               | 1721.64   |

### 9s-HA-4-H<sub>2</sub>H (18)

psHA-4-H<sub>2</sub>H  
pos. ion mode

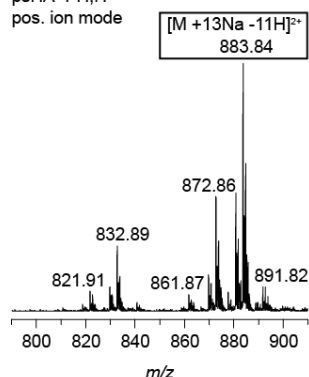

Assignment positive ion mode M (C<sub>28</sub>H<sub>44</sub>N<sub>2</sub>O<sub>49</sub>S<sub>9</sub>) = 1479.85

| m/z    | z | I        | M neutral | assignment                                    | Hill Notation                                                                                                 | calc mass |
|--------|---|----------|-----------|-----------------------------------------------|---------------------------------------------------------------------------------------------------------------|-----------|
| 883.84 | 2 | 10481601 | 1765.68   | [M+13Na-11H] <sup>2+</sup>                    | C <sub>28</sub> H <sub>31</sub> N <sub>2</sub> Na <sub>13</sub> O <sub>49</sub> S <sub>9</sub>                | 1765,62   |
| 880.85 | 2 | 5005344  | 1759.70   | [M+11Na+K-11H] <sup>2+</sup>                  | C <sub>28</sub> H <sub>32</sub> KN <sub>2</sub> Na <sub>11</sub> O <sub>49</sub> S <sub>9</sub>               | 1759,61   |
| 872.86 | 2 | 4830793  | 1743.72   | [M+12Na-10H] <sup>2+</sup>                    | C <sub>28</sub> H <sub>32</sub> N <sub>2</sub> Na <sub>12</sub> O <sub>49</sub> S <sub>9</sub>                | 1743,63   |
| 832.89 | 2 | 2764340  | 1663.78   | [M-SO <sub>3</sub> +12Na-10H] <sup>2+</sup>   | C <sub>28</sub> H <sub>32</sub> N <sub>2</sub> Na <sub>12</sub> O <sub>46</sub> S <sub>8</sub>                | 1663,68   |
| 869.84 | 2 | 1560448  | 1737.68   | [M+10Na+K-11H] <sup>2+</sup>                  | C <sub>28</sub> H <sub>33</sub> KN <sub>2</sub> Na <sub>10</sub> O <sub>49</sub> S <sub>9</sub>               | 1737,63   |
| 330.14 | 1 | 1155132  | 329.14    | *                                             |                                                                                                               |           |
| 891.82 | 2 | 1046645  | 1781.64   | [M+12Na+K]-11H <sup>2+</sup>                  | C <sub>28</sub> H <sub>31</sub> KN <sub>2</sub> Na <sub>12</sub> O <sub>49</sub> S <sub>9</sub>               | 1781,59   |
| 829.86 | 2 | 1014891  | 1657.72   | [M-SO <sub>3</sub> +10Na+K-9H] <sup>2+</sup>  | C <sub>28</sub> H <sub>33</sub> KN <sub>2</sub> Na <sub>10</sub> O <sub>46</sub> S <sub>8</sub>               | 1657,67   |
| 821.91 | 2 | 854239   | 1641.82   | [M-SO <sub>3</sub> +11Na-9H] <sup>2+</sup>    | C <sub>28</sub> H <sub>33</sub> N <sub>2</sub> Na <sub>11</sub> O <sub>46</sub> S <sub>8</sub>                | 1641,69   |
| 877.82 | 2 | 818670   | 1753.64   | [M+9Na+2K-9H] <sup>2+</sup>                   | C <sub>28</sub> H <sub>33</sub> K <sub>2</sub> N <sub>2</sub> Na <sub>9</sub> O <sub>49</sub> S <sub>9</sub>  | 1753,60   |
| 921.82 | 2 | 709113   | 1841.64   | [M+13Na+2K-13H] <sup>2+</sup>                 | C <sub>28</sub> H <sub>29</sub> K <sub>2</sub> N <sub>2</sub> Na <sub>13</sub> O <sub>49</sub> S <sub>9</sub> | 1841,53   |
| 861.87 | 2 | 705510   | 1721.74   | [M+11Na-9H] <sup>2+</sup>                     | C <sub>28</sub> H <sub>33</sub> N <sub>2</sub> Na <sub>11</sub> O <sub>49</sub> S <sub>9</sub>                | 1721,65   |
| 924.85 | 2 | 681380   | 1847.70   | [M+15Na+K-14H] <sup>2+</sup>                  | C <sub>28</sub> H <sub>28</sub> KN <sub>2</sub> Na <sub>15</sub> O <sub>49</sub> S <sub>9</sub>               | 1847,54   |
| 781.89 | 2 | 434072   | 1561.78   | [M-2SO <sub>3</sub> +11Na-9H] <sup>2+</sup>   | C <sub>28</sub> H <sub>33</sub> N <sub>2</sub> Na <sub>11</sub> O <sub>43</sub> S <sub>7</sub>                | 1561,74   |
| 763.22 | 2 | 393859   | 1524.44   | *                                             |                                                                                                               |           |
| 393.12 | 1 | 391086   | 392.12    | *                                             |                                                                                                               |           |
| 910.85 | 2 | 376980   | 1819.70   | [M+12Na+2K-12H] <sup>2+</sup>                 | C <sub>28</sub> H <sub>30</sub> K <sub>2</sub> N <sub>2</sub> Na <sub>12</sub> O <sub>49</sub> S <sub>9</sub> | 1819,55   |
| 840.87 | 2 | 356325   | 1679.74   | [M-SO <sub>3</sub> +11Na+K-10H] <sup>2+</sup> | C <sub>28</sub> H <sub>32</sub> KN <sub>2</sub> Na <sub>11</sub> O <sub>46</sub> S <sub>8</sub>               | 1679,65   |
| 888.85 | 2 | 342841   | 1775.70   | [M+10Na+2K-10H] <sup>2+</sup>                 | C <sub>28</sub> H <sub>32</sub> K <sub>2</sub> N <sub>2</sub> Na <sub>10</sub> O <sub>49</sub> S <sub>9</sub> | 1775,58   |
| 818.87 | 2 | 301330   | 1635.74   | [M-SO <sub>3</sub> +9Na+K-8H] <sup>2+</sup>   | C <sub>28</sub> H <sub>34</sub> KN <sub>2</sub> Na <sub>9</sub> O <sub>46</sub> S <sub>8</sub>                | 1635,69   |
| 913.85 | 2 | 298926   | 1825.70   | [M+14Na+K-13H] <sup>2+</sup>                  | C <sub>28</sub> H <sub>29</sub> KN <sub>2</sub> Na <sub>14</sub> O <sub>49</sub> S <sub>9</sub>               | 1825,55   |

### 13s-HA-6-TAMRA (19)

psHA-6-TAMRA  
pos. ion mode

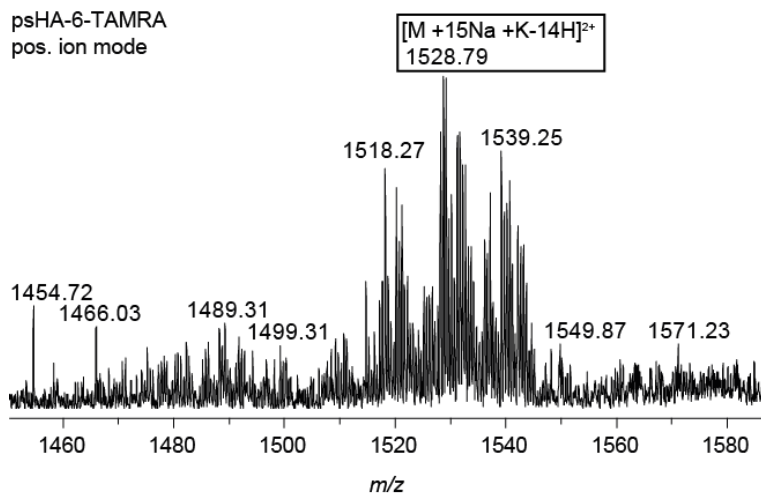

| m/z     | z | I     | M neutral | assignment                 | Hill Notation                           | calc. Mass |
|---------|---|-------|-----------|----------------------------|-----------------------------------------|------------|
| 1528.28 | 2 | 63569 | 3054.56   | $[M+15Na+K-14H]^{2+}$      | $C_{70}H_{73}KN_9Na_{15}O_{76}S_{13}$   | 3054.66    |
| 1531.30 | 2 | 62665 | 3060.60   | $[M+17Na-15H]^{2+}$        | $C_{70}H_{72}N_9Na_{17}O_{76}S_{13}$    | 3060.67    |
| 1539.25 | 2 | 59070 | 3076.50   | $[M+16Na+K-15H]^{2+}$      | $C_{70}H_{72}KN_9Na_{16}O_{76}S_{13}$   | 3076.64    |
| 1518.27 | 2 | 54876 | 3034.54   | $[M+15Na+H_2O-13H]^{2+}$   | $C_{70}H_{76}N_9Na_{15}O_{77}S_{13}$    | 3034.71    |
| 1520.27 | 2 | 50701 | 3038.54   | $[M+16Na-14H]^{2+}$        | $C_{70}H_{73}N_9Na_{16}O_{76}S_{13}$    | 3038.69    |
| 1542.26 | 2 | 41913 | 3082.52   | $[M+18Na-16H]^{2+}$        | $C_{70}H_{71}N_9Na_{18}O_{76}S_{13}$    | 3082.65    |
| 1536.26 | 2 | 38708 | 3070.52   | $[M+14Na+2K-13H]^{2+}$     | $C_{70}H_{73}K_2N_9Na_{14}O_{76}S_{13}$ | 3070.63    |
| 1514.79 | 2 | 28946 | 3027.58   | *                          |                                         |            |
| 1525.28 | 2 | 27805 | 3048.56   | $[M+13Na+2K-13H]^{2+}$     | $C_{70}H_{74}K_2N_9Na_{13}O_{76}S_{13}$ | 3048.65    |
| 1534.77 | 2 | 18773 | 3067.54   | *                          |                                         |            |
| 1509.29 | 2 | 16103 | 3016.58   | $[M+15Na-13H]^{2+}$        | $C_{70}H_{74}N_9Na_{15}O_{76}S_{13}$    | 3016.70    |
| 1498.25 | 2 | 11318 | 2994.50   | $[M+14Na-12H]^{2+}$        | $C_{70}H_{75}N_9Na_{14}O_{76}S_{13}$    | 2994.72    |
| 1584.96 | 2 | 10753 | 3167.92   | *                          |                                         |            |
| 1567.25 | 2 | 10719 | 3132.50   | *                          |                                         |            |
| 1547.27 | 2 | 10346 | 3092.54   | $[M+17Na+K-16H]^{2+}$      | $C_{70}H_{72}K_2N_9Na_{15}O_{76}S_{13}$ | 3092.62    |
| 1563.35 | 2 | 10184 | 3124.70   | *                          |                                         |            |
| 1573.30 | 2 | 10176 | 3144.60   | $[M+20Na+H_2O-18H]^{2+}$   | $C_{70}H_{71}N_9Na_{20}O_{77}S_{13}$    | 3144.62    |
| 1581.32 | 2 | 9961  | 3160.64   | $[M+19Na+K+H_2O-17H]^{2+}$ | $C_{70}H_{71}KN_9Na_{19}O_{77}S_{13}$   | 3160.60    |
| 1576.75 | 2 | 9612  | 3151.50   | *                          |                                         |            |
| 1559.80 | 2 | 9366  | 3117.60   | *                          |                                         |            |
| 1506.29 | 2 | 8992  | 3010.58   | $[M+13Na+K-12H]^{2+}$      | $C_{70}H_{75}KN_9Na_{13}O_{76}S_{13}$   | 3010.70    |
| 1570.26 | 2 | 8427  | 3138.52   | $[M+18Na+K+H_2O-17H]^{2+}$ | $C_{70}H_{72}KN_9Na_{18}O_{77}S_{13}$   | 3138.62    |
| 1575.26 | 2 | 8344  | 3148.52   | $[M+21Na-19H]^{2+}$        | $C_{70}H_{68}N_9Na_{21}O_{76}S_{13}$    | 3148.60    |
| 1554.76 | 2 | 8306  | 3107.52   | $[M+19Na-17H]^{2+}$        | $C_{70}H_{70}N_9Na_{19}O_{76}S_{13}$    | 3104.63    |

(9s-HA-4-S-PEG-S)<sub>2</sub> (20)

(psHA-4-S-PEG-S)<sub>2</sub>  
pos. ion mode

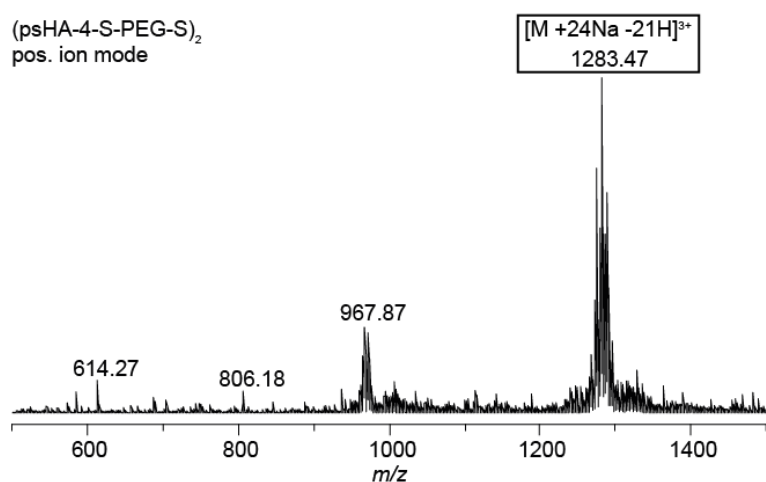

Assignment positive ion mode M (C<sub>68</sub>H<sub>110</sub>N<sub>4</sub>O<sub>102</sub>S<sub>22</sub>) = 3317.74

| m/z     | z | I       | M neutral | assignment                                  | Hill Notation                                                                                                   | calc mass<br>monoisotopic | most abundant<br>isotop |
|---------|---|---------|-----------|---------------------------------------------|-----------------------------------------------------------------------------------------------------------------|---------------------------|-------------------------|
| 1283.47 | 3 | 1388402 | 3847.41   | [M+24Na-21H] <sup>3+</sup>                  | C <sub>68</sub> H <sub>86</sub> N <sub>4</sub> Na <sub>24</sub> O <sub>102</sub> S <sub>22</sub>                | 3845.31                   | 3847.31                 |
| 1276.14 | 3 | 1014043 | 3825.42   | [M+23Na-20H] <sup>3+</sup>                  | C <sub>68</sub> H <sub>87</sub> N <sub>4</sub> Na <sub>23</sub> O <sub>102</sub> S <sub>22</sub>                | 3823.33                   | 3525.33                 |
| 1282.80 | 3 | 980028  | 3845.40   | [M+24Na-21H] <sup>3+</sup>                  | C <sub>68</sub> H <sub>86</sub> N <sub>4</sub> Na <sub>24</sub> O <sub>102</sub> S <sub>22</sub>                | 3845.31                   | 3847.31                 |
| 1290.78 | 3 | 912035  | 3869.34   | [M+25Na-22H] <sup>3+</sup>                  | C <sub>68</sub> H <sub>85</sub> N <sub>4</sub> Na <sub>25</sub> O <sub>102</sub> S <sub>22</sub>                | 3867.29                   | 3869.29                 |
| 1290.11 | 3 | 772408  | 3867.33   | [M+25Na-22H] <sup>3+</sup>                  | C <sub>68</sub> H <sub>85</sub> N <sub>4</sub> Na <sub>25</sub> O <sub>102</sub> S <sub>22</sub>                | 3867.29                   | 3869.29                 |
| 1281.45 | 3 | 765825  | 3841.35   | [M+23Na+H <sub>2</sub> O-20H] <sup>3+</sup> | C <sub>68</sub> H <sub>89</sub> N <sub>4</sub> Na <sub>23</sub> O <sub>103</sub> S <sub>22</sub>                | 3841.34                   | 3843.34                 |
| 1288.78 | 3 | 740172  | 3863.34   | [M+23Na+K-21H] <sup>3+</sup>                | C <sub>68</sub> H <sub>86</sub> KN <sub>4</sub> Na <sub>23</sub> O <sub>102</sub> S <sub>22</sub>               | 3861.28                   | 3863.28                 |
| 1275.47 | 3 | 636490  | 3823.41   | [M+23Na-20H] <sup>3+</sup>                  | C <sub>68</sub> H <sub>87</sub> N <sub>4</sub> Na <sub>23</sub> O <sub>102</sub> S <sub>22</sub>                | 3823.33                   | 3525.33                 |
| 1282.13 | 3 | 607055  | 3843.39   | [M+23Na+H <sub>2</sub> O-20H] <sup>3+</sup> | C <sub>68</sub> H <sub>89</sub> N <sub>4</sub> Na <sub>23</sub> O <sub>103</sub> S <sub>22</sub>                | 3841.34                   | 3843.34                 |
| 1280.81 | 3 | 596561  | 3839.43   | [M+22Na+K-20H] <sup>3+</sup>                | C <sub>68</sub> H <sub>87</sub> KN <sub>4</sub> Na <sub>22</sub> O <sub>102</sub> S <sub>22</sub>               | 3839.30                   | 3941.30                 |
| 1288.13 | 3 | 513533  | 3861.39   | [M+23Na+K-21H] <sup>3+</sup>                | C <sub>68</sub> H <sub>86</sub> KN <sub>4</sub> Na <sub>23</sub> O <sub>102</sub> S <sub>22</sub>               | 3861.28                   | 3863.28                 |
| 1274.80 | 3 | 383093  | 3821.40   | [M+22Na+H <sub>2</sub> O-19H] <sup>3+</sup> | C <sub>68</sub> H <sub>90</sub> N <sub>4</sub> Na <sub>22</sub> O <sub>103</sub> S <sub>22</sub>                | 3819.35                   | 3821.35                 |
| 1286.77 | 3 | 373453  | 3857.31   | [M+21Na+2K-20H] <sup>3+</sup>               | C <sub>68</sub> H <sub>87</sub> K <sub>2</sub> N <sub>4</sub> Na <sub>21</sub> O <sub>102</sub> S <sub>22</sub> | 3855.27                   | 3857.27                 |
| 1274.16 | 3 | 360207  | 3819.48   | [M+22Na+H <sub>2</sub> O-19H] <sup>3+</sup> | C <sub>68</sub> H <sub>90</sub> N <sub>4</sub> Na <sub>22</sub> O <sub>103</sub> S <sub>22</sub>                | 3819.35                   | 3821.35                 |
| 967.87  | 4 | 353815  | 3867.48   | [M+25Na-21H] <sup>4+</sup>                  | C <sub>68</sub> H <sub>85</sub> N <sub>4</sub> Na <sub>25</sub> O <sub>102</sub> S <sub>22</sub>                | 3867.29                   | 3869.29                 |
| 972.37  | 4 | 331947  | 3885.48   | [M+25Na+H <sub>2</sub> O-21H] <sup>4+</sup> | C <sub>68</sub> H <sub>87</sub> N <sub>4</sub> Na <sub>25</sub> O <sub>103</sub> S <sub>22</sub>                | 3885.30                   | 3887.30                 |
| 968.37  | 4 | 330970  | 3869.48   | [M+25Na-21H] <sup>4+</sup>                  | C <sub>68</sub> H <sub>85</sub> N <sub>4</sub> Na <sub>25</sub> O <sub>102</sub> S <sub>22</sub>                | 3867.29                   | 3869.29                 |
| 1286.11 | 3 | 318118  | 3855.33   | [M+21Na+2K-20H] <sup>3+</sup>               | C <sub>68</sub> H <sub>87</sub> K <sub>2</sub> N <sub>4</sub> Na <sub>21</sub> O <sub>102</sub> S <sub>22</sub> | 3855.27                   | 3857.27                 |
| 1279.46 | 3 | 316548  | 3835.38   | [M+20Na+2K-19H] <sup>3+</sup>               | C <sub>68</sub> H <sub>88</sub> K <sub>2</sub> N <sub>4</sub> Na <sub>20</sub> O <sub>102</sub> S <sub>22</sub> | 3833.29                   | 3835.29                 |
| 973.87  | 4 | 303180  | 3891.48   | [M+26Na-22H] <sup>4+</sup>                  | C <sub>68</sub> H <sub>84</sub> N <sub>4</sub> Na <sub>26</sub> O <sub>102</sub> S <sub>22</sub>                | 3889.27                   | 3891.27                 |
| 1273.48 | 3 | 291942  | 3817.44   | [M+21Na+K-19H] <sup>3+</sup>                | C <sub>68</sub> H <sub>88</sub> KN <sub>4</sub> Na <sub>21</sub> O <sub>102</sub> S <sub>22</sub>               | 3817.32                   | 3819.32                 |
| 393.09  | 1 | 290372  | 392.09    | *                                           |                                                                                                                 |                           |                         |
| 972.89  | 4 | 267415  | 3887.56   | [M+25Na+H <sub>2</sub> O-21H] <sup>4+</sup> | C <sub>68</sub> H <sub>87</sub> N <sub>4</sub> Na <sub>25</sub> O <sub>103</sub> S <sub>22</sub>                | 3885.30                   | 3887.30                 |
| 973.36  | 4 | 263254  | 3889.44   | [M+26Na-22H] <sup>4+</sup>                  | C <sub>68</sub> H <sub>84</sub> N <sub>4</sub> Na <sub>26</sub> O <sub>102</sub> S <sub>22</sub>                | 3889.27                   | 3891.27                 |
| 969.37  | 4 | 246322  | 3873.48   | *                                           |                                                                                                                 |                           |                         |
| 1278.82 | 3 | 244923  | 3833.46   | [M+20Na+2K-19H] <sup>3+</sup>               | C <sub>68</sub> H <sub>88</sub> K <sub>2</sub> N <sub>4</sub> Na <sub>20</sub> O <sub>102</sub> S <sub>22</sub> | 3833.29                   | 3835.29                 |
| 1268.81 | 3 | 241202  | 3803.43   | [M+22Na-19H] <sup>3+</sup>                  | C <sub>68</sub> H <sub>88</sub> N <sub>4</sub> Na <sub>22</sub> O <sub>102</sub> S <sub>22</sub>                | 3801.34                   | 3803.34                 |
| 971.88  | 4 | 240273  | 3883.52   | [M+24Na+K-21H] <sup>4+</sup>                | C <sub>68</sub> H <sub>85</sub> KN <sub>4</sub> Na <sub>24</sub> O <sub>102</sub> S <sub>22</sub>               | 3883.26                   | 3885.26                 |
| 1296.77 | 3 | 239535  | 3887.31   | [M+25Na+H <sub>2</sub> O-22H] <sup>3+</sup> | C <sub>68</sub> H <sub>87</sub> N <sub>4</sub> Na <sub>25</sub> O <sub>103</sub> S <sub>22</sub>                | 3885.30                   | 3887.30                 |
| 966.89  | 4 | 237603  | 3863.56   | [M+24Na+H <sub>2</sub> O-20H] <sup>4+</sup> | C <sub>68</sub> H <sub>88</sub> N <sub>4</sub> Na <sub>24</sub> O <sub>103</sub> S <sub>22</sub>                | 3863.32                   | 3865.32                 |
| 1296.09 | 3 | 218351  | 3885.27   | [M+24Na+K-22H] <sup>3+</sup>                | C <sub>68</sub> H <sub>85</sub> KN <sub>4</sub> Na <sub>24</sub> O <sub>102</sub> S <sub>22</sub>               | 3883.26                   | 3885.26                 |
| 1295.46 | 3 | 218224  | 3883.38   | [M+24Na+K-22H] <sup>3+</sup>                | C <sub>68</sub> H <sub>85</sub> KN <sub>4</sub> Na <sub>24</sub> O <sub>102</sub> S <sub>22</sub>               | 3883.26                   | 3885.26                 |
| 1294.09 | 3 | 202931  | 3879.27   | [M+22Na+2K-21H] <sup>3+</sup>               | C <sub>68</sub> H <sub>86</sub> K <sub>2</sub> N <sub>4</sub> Na <sub>22</sub> O <sub>102</sub> S <sub>22</sub> | 3877.25                   | 3879.25                 |
| 1297.40 | 3 | 184008  | 3889.20   | [M+26Na-23H] <sup>3+</sup>                  | C <sub>68</sub> H <sub>84</sub> N <sub>4</sub> Na <sub>26</sub> O <sub>102</sub> S <sub>22</sub>                | 3889.27                   | 3891.27                 |
| 301.12  | 1 | 179939  | 300.12    | *                                           |                                                                                                                 |                           |                         |
| 1268.14 | 3 | 172128  | 3801.42   | [M+22Na-19H] <sup>3+</sup>                  | C <sub>68</sub> H <sub>88</sub> N <sub>4</sub> Na <sub>22</sub> O <sub>102</sub> S <sub>22</sub>                | 3801.34                   | 3803.34                 |
| 966.39  | 4 | 142775  | 3861.56   | [M+23Na+K-20H] <sup>4+</sup>                | C <sub>68</sub> H <sub>86</sub> KN <sub>4</sub> Na <sub>23</sub> O <sub>102</sub> S <sub>22</sub>               | 3861.28                   | 3863.28                 |
| 1272.14 | 3 | 137977  | 3813.42   | [M+19Na+2K-18H] <sup>3+</sup>               | C <sub>68</sub> H <sub>89</sub> K <sub>2</sub> N <sub>4</sub> Na <sub>19</sub> O <sub>102</sub> S <sub>22</sub> | 3811.31                   | 3813.31                 |
| 1304.09 | 3 | 136605  | 3909.27   | [M+26Na+H <sub>2</sub> O-23H] <sup>3+</sup> | C <sub>68</sub> H <sub>86</sub> N <sub>4</sub> Na <sub>26</sub> O <sub>103</sub> S <sub>22</sub>                | 3907.28                   | 3909.28                 |
| 614.27  | 1 | 135399  | 613.27    | *                                           |                                                                                                                 |                           |                         |
| 357.17  | 1 | 132407  | 356.17    | *                                           |                                                                                                                 |                           |                         |

**2s-HA4-N<sub>3</sub> (21)**

MS-spectrum and Assignment positive ion mode, M = 961.15

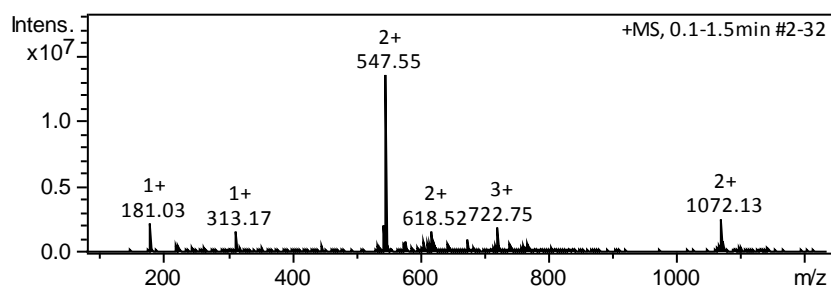

| m/z     | z | I        | M neutral | assignment          | Hillnotation                         | calc mass |
|---------|---|----------|-----------|---------------------|--------------------------------------|-----------|
| 547.55  | 2 | 13352009 | 1093.10   | $[M+6Na-4H]^{2+}$   | $C_{28}H_{37}N_5Na_6O_{28}S_2$       | 1093.05   |
| 1072.13 | 2 | 2404363  | 2142.26   | $[2M+10Na-8H]^{2+}$ | $C_{56}H_{76}N_{10}Na_{10}O_{56}S_4$ | 2142.13   |
| 181.03  | 1 | 2061940  | 180.03    |                     |                                      |           |
| 544.53  | 2 | 2027764  | 1087.06   |                     |                                      |           |
| 722.43  | 3 | 1655720  | 2164.29   | $[2M+11Na-8H]^{3+}$ | $C_{56}H_{75}N_{10}Na_{11}O_{56}S_4$ | 2164.11   |
| 618.52  | 2 | 1534465  | 1235.04   |                     |                                      |           |
| 313.17  | 1 | 1507271  | 312.17    |                     |                                      |           |

MS-spectrum and Assignment negative ion mode, M = 961.15

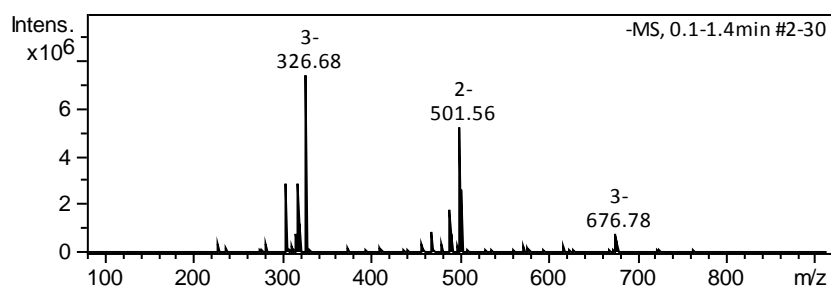

| m/z    | z | I       | M neutral | assignment            | Hillnotation                      | calc mass |
|--------|---|---------|-----------|-----------------------|-----------------------------------|-----------|
| 326.68 | 3 | 7323908 | 983.04    | $[M+Na-4H]^{3-}$      | $C_{28}H_{42}N_5NaO_{28}S_2$      | 983.14    |
| 501.56 | 2 | 5149314 | 1005.12   | $[M+2Na-4H]^{2-}$     | $C_{28}H_{41}N_5Na_2O_{28}S_2$    | 1005.12   |
| 305.00 | 3 | 2855341 | 918.00    | $[M-HN_3-3H]^{3-}$    | $C_{28}H_{42}N_2O_{28}S_2$        | 918.76    |
| 319.36 | 3 | 2820579 | 961.08    | $[M-3H]^{3-}$         | $C_{28}H_{43}N_5O_{28}S_2$        | 961.15    |
| 490.56 | 2 | 1706058 | 983.12    | $[M+Na-3H]^{2-}$      | $C_{28}H_{42}N_5NaO_{28}S_2$      | 983.14    |
| 469.05 | 2 | 794477  | 940.10    | $[M+Na-HN_3-3H]^{2-}$ | $C_{28}H_{41}N_2NaO_{28}S_2$      | 940.12    |
| 316.51 | 2 | 753950  | 635.02    |                       |                                   |           |
| 676.44 | 3 | 735860  | 2032.32   | $[2M+5Na-8H]^{3-}$    | $C_{56}H_{81}N_{10}Na_5O_{56}S_4$ | 2032.22   |

5s-HA-2-N<sub>3</sub> (24)

psHA-2-N3  
pos. ion mode

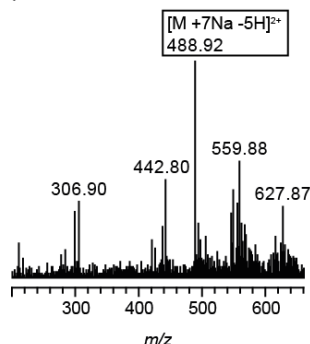

Assignment positive ion mode M (C<sub>14</sub>H<sub>22</sub>N<sub>4</sub>O<sub>26</sub>S<sub>5</sub>) = 821.91

| m/z    | z | I       | M neutral | assignment                                                      | Hill Notation                                                                                                 | calc mass |
|--------|---|---------|-----------|-----------------------------------------------------------------|---------------------------------------------------------------------------------------------------------------|-----------|
| 488.92 | 2 | 6570339 | 975.84    | [M+7Na-5H] <sup>2+</sup>                                        | C <sub>14</sub> H <sub>15</sub> N <sub>4</sub> Na <sub>7</sub> O <sub>26</sub> S <sub>5</sub>                 | 975.79    |
| 559.88 | 2 | 3549266 | 1117.76   | [M+10Na+2K-10H] <sup>2+</sup>                                   | C <sub>14</sub> H <sub>10</sub> K <sub>2</sub> N <sub>4</sub> Na <sub>10</sub> O <sub>26</sub> S <sub>5</sub> | 1117.64   |
| 442.80 | 2 | 2977644 | 883.60    | [M+2Na+H <sub>2</sub> O] <sup>2+</sup>                          | C <sub>14</sub> H <sub>22</sub> N <sub>4</sub> Na <sub>2</sub> O <sub>27</sub> S <sub>5</sub>                 | 883.89    |
| 548.89 | 2 | 2686230 | 1095.78   | [M+9Na+2K-9H] <sup>2+</sup>                                     | C <sub>14</sub> H <sub>11</sub> K <sub>2</sub> N <sub>4</sub> Na <sub>9</sub> O <sub>26</sub> S <sub>5</sub>  | 1095.66   |
| 306.90 | 3 | 2332502 | 917.70    | [M-SO <sub>3</sub> +8Na-5H] <sup>3+</sup>                       | C <sub>14</sub> H <sub>14</sub> N <sub>4</sub> Na <sub>8</sub> O <sub>23</sub> S <sub>4</sub>                 | 917.81    |
| 556.89 | 2 | 2271198 | 1111.78   | [M+8Na+3K-9H] <sup>2+</sup>                                     | C <sub>14</sub> H <sub>11</sub> K <sub>3</sub> N <sub>4</sub> Na <sub>8</sub> O <sub>26</sub> S <sub>5</sub>  | 1111.64   |
| 627.87 | 2 | 2167676 | 1253.74   | [M+SO <sub>3</sub> +10Na+3K+H <sub>2</sub> O-11H] <sup>2+</sup> | C <sub>14</sub> H <sub>11</sub> K <sub>3</sub> N <sub>4</sub> Na <sub>10</sub> O <sub>30</sub> S <sub>6</sub> | 1253.57   |
| 300.86 | 3 | 2008585 | 899.58    | [M+Na+K+H <sub>2</sub> O+H] <sup>3+</sup>                       | C <sub>14</sub> H <sub>22</sub> KN <sub>4</sub> NaO <sub>27</sub> S <sub>5</sub>                              | 899.86    |
| 545.86 | 2 | 1949072 | 1089.72   | [M+7Na+3K-7H] <sup>2+</sup>                                     | C <sub>14</sub> H <sub>12</sub> K <sub>3</sub> N <sub>4</sub> Na <sub>7</sub> O <sub>26</sub> S <sub>5</sub>  | 1089.65   |
| 562.79 | 2 | 1647483 | 1123.58   | [M+6Na+4K+H <sub>2</sub> O-8H] <sup>2+</sup>                    | C <sub>14</sub> H <sub>14</sub> K <sub>4</sub> N <sub>4</sub> Na <sub>6</sub> O <sub>27</sub> S <sub>5</sub>  | 1123.64   |
| 494.85 | 2 | 1642882 | 987.70    | [M+5Na+K+H <sub>2</sub> O-4H] <sup>2+</sup>                     | C <sub>14</sub> H <sub>18</sub> KN <sub>4</sub> Na <sub>5</sub> O <sub>27</sub> S <sub>5</sub>                | 987.79    |
| 567.88 | 2 | 1624850 | 1133.76   | [M+9Na+3K-10H] <sup>2+</sup>                                    | C <sub>14</sub> H <sub>10</sub> K <sub>3</sub> N <sub>4</sub> Na <sub>9</sub> O <sub>26</sub> S <sub>5</sub>  | 1133.62   |
| 437.96 | 2 | 1562895 | 873.92    | [M-SO <sub>3</sub> +6Na-4H] <sup>2+</sup>                       | C <sub>14</sub> H <sub>16</sub> N <sub>4</sub> Na <sub>6</sub> O <sub>23</sub> S <sub>4</sub>                 | 873.85    |
| 616.82 | 2 | 1243053 | 1231.64   | [M+SO <sub>3</sub> +9Na+3K+H <sub>2</sub> O-10H] <sup>2+</sup>  | C <sub>14</sub> H <sub>12</sub> K <sub>3</sub> N <sub>4</sub> Na <sub>9</sub> O <sub>30</sub> S <sub>6</sub>  | 1231.59   |
| 505.87 | 2 | 1239225 | 1009.74   | [M+6Na+K+H <sub>2</sub> O-5H] <sup>2+</sup>                     | C <sub>14</sub> H <sub>17</sub> KN <sub>4</sub> Na <sub>6</sub> O <sub>27</sub> S <sub>5</sub>                | 1009.77   |
| 497.91 | 2 | 1159225 | 993.82    | [M+7Na+H <sub>2</sub> O-5H] <sup>2+</sup>                       | C <sub>14</sub> H <sub>17</sub> N <sub>4</sub> Na <sub>7</sub> O <sub>27</sub> S <sub>5</sub>                 | 993.80    |
| 420.84 | 2 | 1151681 | 839.68    | *                                                               |                                                                                                               |           |
| 564.82 | 2 | 1104708 | 1127.64   | [M+7Na+4K-9H] <sup>2+</sup>                                     | C <sub>14</sub> H <sub>11</sub> K <sub>4</sub> N <sub>4</sub> Na <sub>7</sub> O <sub>26</sub> S <sub>5</sub>  | 1127.61   |
| 547.34 | 2 | 1073578 | 1092.68   | *                                                               |                                                                                                               |           |
| 624.83 | 2 | 1053081 | 1247.66   | [M+SO <sub>3</sub> +8Na+4K+H <sub>2</sub> O-10H] <sup>2+</sup>  | C <sub>14</sub> H <sub>12</sub> K <sub>4</sub> N <sub>4</sub> Na <sub>8</sub> O <sub>30</sub> S <sub>6</sub>  | 1247.56   |
| 584.72 | 1 | 1015186 | 583.72    | *                                                               |                                                                                                               |           |
| 630.81 | 2 | 1004505 | 1259.62   | [M+SO <sub>3</sub> +12Na+2K+H <sub>2</sub> O-12H] <sup>2+</sup> | C <sub>14</sub> H <sub>10</sub> K <sub>2</sub> N <sub>4</sub> Na <sub>12</sub> O <sub>30</sub> S <sub>6</sub> | 1259.58   |
| 426.83 | 2 | 925518  | 851.66    | [M-SO <sub>3</sub> +5Na-3H] <sup>2+</sup>                       | C <sub>14</sub> H <sub>17</sub> N <sub>4</sub> Na <sub>5</sub> O <sub>23</sub> S <sub>4</sub>                 | 851.87    |
| 553.90 | 2 | 916653  | 1105.80   | [M+6Na+4K-8H] <sup>2+</sup>                                     | C <sub>14</sub> H <sub>12</sub> K <sub>4</sub> N <sub>4</sub> Na <sub>6</sub> O <sub>26</sub> S <sub>5</sub>  | 1105.63   |
| 574.89 | 2 | 886337  | 1147.78   | *                                                               |                                                                                                               |           |
| 284.92 | 3 | 870242  | 851.76    | [M-SO <sub>3</sub> +5Na-2H] <sup>3+</sup>                       | C <sub>14</sub> H <sub>17</sub> N <sub>4</sub> Na <sub>5</sub> O <sub>23</sub> S <sub>4</sub>                 | 851.87    |
| 635.84 | 2 | 854511  | 1269.68   | [M+SO <sub>3</sub> +9Na+4K+H <sub>2</sub> O-11H] <sup>2+</sup>  | C <sub>14</sub> H <sub>11</sub> K <sub>4</sub> N <sub>4</sub> Na <sub>9</sub> O <sub>30</sub> S <sub>6</sub>  | 1269.54   |
| 576.88 | 2 | 833787  | 1151.76   | [M+9Na+3K+H <sub>2</sub> O-10H] <sup>2+</sup>                   | C <sub>14</sub> H <sub>12</sub> K <sub>3</sub> N <sub>4</sub> Na <sub>9</sub> O <sub>27</sub> S <sub>5</sub>  | 1151.63   |
| 524.80 | 2 | 800281  | 1047.60   | [M+6Na+2K+H <sub>2</sub> O-5H] <sup>2+</sup>                    | C <sub>14</sub> H <sub>16</sub> K <sub>2</sub> N <sub>4</sub> Na <sub>6</sub> O <sub>27</sub> S <sub>5</sub>  | 1047.73   |
| 619.83 | 2 | 763851  | 1237.66   | [M+SO <sub>3</sub> +11Na+2K+H <sub>2</sub> O-11H] <sup>2+</sup> | C <sub>14</sub> H <sub>11</sub> K <sub>2</sub> N <sub>4</sub> Na <sub>11</sub> O <sub>30</sub> S <sub>6</sub> | 1237.59   |
| 613.36 | 2 | 749933  | 1224.72   | *                                                               |                                                                                                               |           |
| 508.96 | 2 | 731164  | 1015.92   | [M+8Na+H <sub>2</sub> O-6H] <sup>2+</sup>                       | C <sub>14</sub> H <sub>16</sub> N <sub>4</sub> Na <sub>8</sub> O <sub>27</sub> S <sub>5</sub>                 | 1015.78   |
| 279.24 | 3 | 728502  | 834.72    | *                                                               |                                                                                                               |           |
| 608.83 | 2 | 727289  | 1215.66   | [M+SO <sub>3</sub> +10Na+2K+H <sub>2</sub> O-10H] <sup>2+</sup> | C <sub>14</sub> H <sub>12</sub> K <sub>2</sub> N <sub>4</sub> Na <sub>10</sub> O <sub>30</sub> S <sub>6</sub> | 1215.61   |
| 587.87 | 2 | 721021  | 1173.74   | [M+10Na+3K+H <sub>2</sub> O-11H] <sup>2+</sup>                  | C <sub>14</sub> H <sub>11</sub> K <sub>3</sub> N <sub>4</sub> Na <sub>10</sub> O <sub>27</sub> S <sub>5</sub> | 1173.61   |
| 578.75 | 2 | 690956  | 1155.50   | [M+10Na+3K-11H] <sup>2+</sup>                                   | C <sub>14</sub> H <sub>9</sub> K <sub>3</sub> N <sub>4</sub> Na <sub>10</sub> O <sub>26</sub> S <sub>5</sub>  | 1155.60   |
| 516.88 | 2 | 663507  | 1031.76   | [M+7Na+K+H <sub>2</sub> O-6H] <sup>2+</sup>                     | C <sub>14</sub> H <sub>16</sub> KN <sub>4</sub> Na <sub>7</sub> O <sub>27</sub> S <sub>5</sub>                | 1031.75   |
| 537.32 | 2 | 663487  | 1072.64   | *                                                               |                                                                                                               |           |
| 444.79 | 2 | 642426  | 887.58    | [M+3Na-H] <sup>2+</sup>                                         | C <sub>14</sub> H <sub>19</sub> N <sub>4</sub> Na <sub>3</sub> O <sub>26</sub> S <sub>5</sub>                 | 887.86    |
| 639.26 | 2 | 636651  | 1276.52   | *                                                               |                                                                                                               |           |
| 219.20 | 3 | 629011  | 654.60    | *                                                               |                                                                                                               |           |

### 13s-HA-6-N<sub>3</sub> (26)

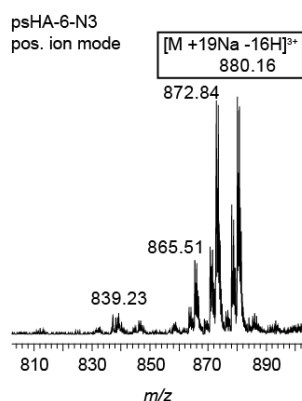

Assignment positive ion mode M (C<sub>42</sub>H<sub>64</sub>N<sub>6</sub>O<sub>72</sub>S<sub>13</sub>) = 2219.79

| m/z     | z | I      | M neutral | assignment                                     | Hill notation                                                                                                  | calc. mass |
|---------|---|--------|-----------|------------------------------------------------|----------------------------------------------------------------------------------------------------------------|------------|
| 880.16  | 3 | 101659 | 2637.48   | [M+19Na-16H] <sup>3+</sup>                     | C <sub>42</sub> H <sub>45</sub> N <sub>6</sub> Na <sub>19</sub> O <sub>72</sub> S <sub>13</sub>                | 2637.45    |
| 872.84  | 3 | 93691  | 2615.52   | [M+18Na-15H] <sup>3+</sup>                     | C <sub>42</sub> H <sub>46</sub> N <sub>6</sub> Na <sub>18</sub> O <sub>72</sub> S <sub>13</sub>                | 2615.47    |
| 878.16  | 3 | 48902  | 2631.48   | [M+17Na+K-15H] <sup>3+</sup>                   | C <sub>42</sub> H <sub>46</sub> KN <sub>6</sub> Na <sub>17</sub> O <sub>72</sub> S <sub>13</sub>               | 2631.44    |
| 870.83  | 3 | 33144  | 2609.49   | [M+16Na+K-14H] <sup>3+</sup>                   | C <sub>42</sub> H <sub>47</sub> KN <sub>6</sub> Na <sub>16</sub> O <sub>72</sub> S <sub>13</sub>               | 2609.46    |
| 865.51  | 3 | 28655  | 2593.53   | [M+17Na-14H] <sup>3+</sup>                     | C <sub>42</sub> H <sub>47</sub> N <sub>6</sub> Na <sub>17</sub> O <sub>72</sub> S <sub>13</sub>                | 2593.48    |
| 863.51  | 3 | 10497  | 2587.53   | [M+15Na+K-13H] <sup>3+</sup>                   | C <sub>42</sub> H <sub>48</sub> KN <sub>6</sub> Na <sub>15</sub> O <sub>72</sub> S <sub>13</sub>               | 2587.48    |
| 876.15  | 3 | 9071   | 2625.45   | [M+15Na+2K-14H] <sup>3+</sup>                  | C <sub>42</sub> H <sub>47</sub> K <sub>2</sub> N <sub>6</sub> Na <sub>15</sub> O <sub>72</sub> S <sub>13</sub> | 2625.43    |
| 885.46  | 3 | 8013   | 2653.38   | [M+18Na+K-16H] <sup>3+</sup>                   | C <sub>42</sub> H <sub>45</sub> KN <sub>6</sub> Na <sub>18</sub> O <sub>72</sub> S <sub>13</sub>               | 2653.42    |
| 884.10  | 3 | 7447   | 2649.30   | [M-SO <sub>3</sub> +18Na+3K-18H] <sup>3+</sup> | C <sub>42</sub> H <sub>43</sub> K <sub>3</sub> N <sub>6</sub> Na <sub>18</sub> O <sub>69</sub> S <sub>12</sub> | 2649.38    |
| 838.86  | 3 | 6217   | 2513.58   | [M-SO <sub>3</sub> +17Na-14H] <sup>3+</sup>    | C <sub>42</sub> H <sub>47</sub> N <sub>6</sub> Na <sub>17</sub> O <sub>69</sub> S <sub>12</sub>                | 2513.53    |
| 846.17  | 3 | 4801   | 2535.51   | [M-SO <sub>3</sub> +18Na-15H] <sup>3+</sup>    | C <sub>42</sub> H <sub>46</sub> N <sub>6</sub> Na <sub>18</sub> O <sub>69</sub> S <sub>12</sub>                | 2535.51    |
| 868.83  | 3 | 4335   | 2603.49   | [M+14Na+2K-13H] <sup>3+</sup>                  | C <sub>42</sub> H <sub>48</sub> K <sub>2</sub> N <sub>6</sub> Na <sub>14</sub> O <sub>72</sub> S <sub>13</sub> | 2603.45    |
| 858.19  | 3 | 3563   | 2571.57   | [M+16Na-13H] <sup>3+</sup>                     | C <sub>42</sub> H <sub>48</sub> N <sub>6</sub> Na <sub>16</sub> O <sub>72</sub> S <sub>13</sub>                | 2571.50    |
| 890.77  | 3 | 2355   | 2669.31   | [M+17Na+2K-16H] <sup>3+</sup>                  | C <sub>42</sub> H <sub>45</sub> K <sub>2</sub> N <sub>6</sub> Na <sub>17</sub> O <sub>72</sub> S <sub>13</sub> | 2669.40    |
| 903.48  | 3 | 2322   | 2707.44   | [M+17Na+3K-17H] <sup>3+</sup>                  | C <sub>42</sub> H <sub>44</sub> K <sub>3</sub> N <sub>6</sub> Na <sub>17</sub> O <sub>72</sub> S <sub>13</sub> | 2707.35    |
| 894.80  | 3 | 2319   | 2681.40   | [M+21Na-18H] <sup>3+</sup>                     | C <sub>42</sub> H <sub>43</sub> N <sub>6</sub> Na <sub>21</sub> O <sub>72</sub> S <sub>13</sub>                | 2681.41    |
| 910.82  | 3 | 2286   | 2729.46   | [M+18Na+3K-18H] <sup>3+</sup>                  | C <sub>42</sub> H <sub>43</sub> K <sub>3</sub> N <sub>6</sub> Na <sub>18</sub> O <sub>72</sub> S <sub>13</sub> | 2729.33    |
| 844.17  | 3 | 2108   | 2529.51   | [M-SO <sub>3</sub> +16Na+K-14H] <sup>3+</sup>  | C <sub>42</sub> H <sub>47</sub> KN <sub>6</sub> Na <sub>16</sub> O <sub>69</sub> S <sub>12</sub>               | 2529.50    |
| 896.13  | 3 | 1968   | 2685.39   | [M+16Na+3K-16H] <sup>3+</sup>                  | C <sub>42</sub> H <sub>45</sub> K <sub>3</sub> N <sub>6</sub> Na <sub>16</sub> O <sub>72</sub> S <sub>13</sub> | 2685.37    |
| 836.83  | 3 | 1905   | 2507.49   | [M-SO <sub>3</sub> +15Na+K-13H] <sup>3+</sup>  | C <sub>42</sub> H <sub>48</sub> KN <sub>6</sub> Na <sub>15</sub> O <sub>69</sub> S <sub>12</sub>               | 2507.52    |
| 831.54  | 3 | 1788   | 2491.62   | [M-SO <sub>3</sub> +16Na-13H] <sup>3+</sup>    | C <sub>42</sub> H <sub>48</sub> N <sub>6</sub> Na <sub>16</sub> O <sub>69</sub> S <sub>12</sub>                | 2491.54    |
| 856.86  | 3 | 1665   | 2567.58   | [M-SO <sub>3</sub> +16Na+2K-15H] <sup>3+</sup> | C <sub>42</sub> H <sub>46</sub> K <sub>2</sub> N <sub>6</sub> Na <sub>16</sub> O <sub>69</sub> S <sub>12</sub> | 2567.46    |
| 812.19  | 3 | 1648   | 2433.57   | [M-2SO <sub>3</sub> +17Na-14H] <sup>3+</sup>   | C <sub>42</sub> H <sub>47</sub> N <sub>6</sub> Na <sub>17</sub> O <sub>66</sub> S <sub>11</sub>                | 2433.57    |
| 861.50  | 3 | 1578   | 2581.50   | [M+13Na+2K-12H] <sup>3+</sup>                  | C <sub>42</sub> H <sub>49</sub> K <sub>2</sub> N <sub>6</sub> Na <sub>13</sub> O <sub>72</sub> S <sub>13</sub> | 2581.47    |
| 898.10  | 3 | 1502   | 2691.30   | [M+18Na+2K-17H] <sup>3+</sup>                  | C <sub>42</sub> H <sub>44</sub> K <sub>2</sub> N <sub>6</sub> Na <sub>18</sub> O <sub>72</sub> S <sub>13</sub> | 2691.38    |
| 1308.66 | 2 | 1232   | 2615.32   | [M+18Na-16H] <sup>2+</sup>                     | C <sub>42</sub> H <sub>46</sub> N <sub>6</sub> Na <sub>18</sub> O <sub>72</sub> S <sub>13</sub>                | 2615.47    |
| 1297.67 | 2 | 1021   | 2593.34   | [M+17Na-15H] <sup>2+</sup>                     | C <sub>42</sub> H <sub>47</sub> N <sub>6</sub> Na <sub>17</sub> O <sub>72</sub> S <sub>13</sub>                | 2593.48    |
| 1286.68 | 2 | 805    | 2571.36   | [M+16Na-14H] <sup>2+</sup>                     | C <sub>42</sub> H <sub>48</sub> N <sub>6</sub> Na <sub>16</sub> O <sub>72</sub> S <sub>13</sub>                | 2571.50    |
| 1294.66 | 2 | 611    | 2587.32   | [M+15Na+K-14H] <sup>2+</sup>                   | C <sub>42</sub> H <sub>48</sub> KN <sub>6</sub> Na <sub>15</sub> O <sub>72</sub> S <sub>13</sub>               | 2587.48    |



#### 4. Calculation of the overall binding affinity of a ligand A binding to a protein P with n different, mutually excluding binding modes

Ligand A binds to  $i = 1, 2, \dots, n$  binding sites with the  $K_{Di}$  values  $K_{D1}, K_{D2}, \dots, K_{Dn}$  forming the protein-ligand complexes  $PA_1, \dots, PA_n$ .

Each of these  $K_D$  values is defined by the equation  $K_{Di} = [A^{\text{free}}] * [P^{\text{free}}] / [PA_i]$ .

The overall binding affinity of ligand A,  $K_{D \text{ total}}$  is then defined as:  $K_{D \text{ total}} = [A^{\text{free}}] * [P^{\text{free}}] / ([PA_1] + [PA_2] + \dots + [PA_n])$  as  $[PA_{\text{total}}] = [PA_1] + [PA_2] + \dots + [PA_n]$ .

If now - in a simplified special case - all specific affinities  $K_{Di}$  are equal:  $K_{D1} = K_{D2} = \dots = K_{Dn}$ , the total affinity is:  $K_{D \text{ total}} = [A^{\text{free}}] * [P^{\text{free}}] / n * [PA_i] = 1/n * K_{D1}$ .

#### 5. Fluorescence Polarization Assays

##### *Binding Assay*

*Determination of the binding affinities of the carboxytetramethylrhodamine labeled polysulfated tetra- and hexahyaluronan 15 and 19:* For all experiments the same PBS-buffer (10 mM  $\text{Na}_2\text{HPO}_4$ , 1.8 mM  $\text{KH}_2\text{PO}_4$ , 2.7 mM KCl, 0.1% Triton X-100, adjusted with 0.2 M NaOH to pH 7.5) was used. For fluorescence polarization measurements, both TAMRA-regioisomers from fluorescent probe **15 (A+B)** and **19 (A+B)** were dissolved in PBS-buffer and mixed 1:1. The assay was carried out on untreated black 384-well microtiter plates (Low volume, Non-Binding Surface, Round Bottom, Non-Sterile Black Polystyrene, Corning B.V. Life Sciences, Nr. 3676) in a final volume of 10  $\mu\text{L}$  PBS-buffer. The measurements were performed on microplate reader SAFIRE II (Tecan, Crailsheim, Germany), using excitation wavelength 530 nm (5 nm band pass) and emission wavelength 590 nm (20 nm band pass). The plates were read with an instrument setting of 10 flashes per well (G-factor: 0.97809).

The final assays mixtures were composed by 5  $\mu\text{L}$  **15** or **19** (maintaining a final assay concentration of 10 nM), and 5  $\mu\text{L}$  of increasing amounts of the protein dissolved in PBS-buffer. The negative control was composed by 5  $\mu\text{L}$  of **15** or **19** (maintaining its final assay concentration of 10 nM) and 5  $\mu\text{L}$  in PBS-buffer. To avoid protein aggregation Triton X-100 (0.1%, final concentration) was used in all experiments as detergent. After addition of the components, the plates were centrifuged ( $2000 \text{ min}^{-1}$ , 30 sec.), shaken briefly (2000 rpm for 10 min at room temperature), and polarization of the emitted fluorophore was directly recorded. The polarization values (mP) were plotted as a function of the logarithm of the protein concentration. All the experiments were carried out in triplicates in three, or in few cases, two independent experiments and the results are expressed as the medium  $\pm$  standard deviation (SD).

##### *Competitive Binding Assay*

*Determination of the binding affinities of non-fluorescent competitors 16, 17, 18, 20, 21, 22, 23, 24, 25, 26:* For fluorescence polarization competition experiments, fluorescent probe **15** or **19**, competitors and proteins were dissolved in PBS-buffer. The assay was carried out on untreated black 384-well microtiter plates (Low volume, Non-Binding Surface, Round Bottom, Non-Sterile Black Polystyrene, Corning B.V. Life Sciences, Nr. 3676) in a final volume of 10  $\mu\text{L}$  PBS-buffer. The measurements were performed on microplate reader SAFIRE II (Tecan, Crailsheim, Germany), using excitation wavelength 530 nm (5 nm band pass) and emission wavelength 590 nm (20 nm band pass). The plates were read with an instrument setting of 10 flashes per well (G-factor: 0.97809).

The final assays mixtures were composed by 4  $\mu\text{L}$  **15** or **19** (maintaining a final assay concentration of 10 nM), 4  $\mu\text{L}$  of the protein (maintaining a final assay concentration which corresponds to the  $EC_{50}$ ,  $2 \times EC_{50}$  or  $4 \times EC_{50}$ ) and 2  $\mu\text{L}$  of increasing concentrations of the competitor. The negative control was composed by 4  $\mu\text{L}$  of **15** or **19** (maintaining its final assay concentration of 10 nM), 4  $\mu\text{L}$  PBS-buffer and 2  $\mu\text{L}$  of increasing concentrations of the competitor.

After addition of the 4  $\mu\text{L}$  **15** or **19** and 4  $\mu\text{L}$  of the protein, the plates were centrifuged (2000  $\text{min}^{-1}$ , 30 sec.) and shaken briefly (2000 rpm for 10 min at room temperature) to form the protein-fluorescent probe-complex. Thereafter, 2  $\mu\text{L}$  of competitor was added, the plates were centrifuged again (2000  $\text{min}^{-1}$ , 30 sec.), shaken briefly (2000 rpm for 10 min at room temperature) and polarization of the emitted fluorophor was directly recorded. All the experiments were carried out in triplicates in three, or few cases two, independent experiments and the results are expressed as the medium  $\pm$  standard deviation (SD).

### ***FP-Assay data analysis***

#### Binding assay

As first parameter, the final assay concentration for the tetra- and hexameric fluorescent probes **15** and **19** was set to 10 nM to have sufficient changes in the polarization signal ( $\Delta\text{mP}$ ) for all proteins. The determination of half maximal effective concentrations ( $EC_{50}$ ) was carried out by recording the polarization signals for increasing protein concentrations until saturation was reached. The observed polarization values were plotted against the logarithmic protein concentration and fitted with Graph Pad Prism 6, using the four-parameter (bottom, top, log  $EC_{50}$ , and Hill slope) sigmoidal curve fit as non-linear regression model. The inflection point of the fitted curve corresponds to the  $EC_{50}$  value. These values not necessarily exhibit biological relevance due to possible fluorophore quenching effects caused by local pH-changes, hydrophobic interactions or different mobility upon binding.<sup>7</sup> The proportion of bound and unbound fraction to the observable  $EC_{50}$  value is in direct correlation to the  $Q$ -factor defined as quotient of fluorescent intensity of bound- and free ligand ( $Q = I_B/I_F$ ). In practice,  $Q$ -factors are determined by plotting the fluorescence intensity against logarithmic protein concentration, where the bottom of the sigmoidal curve represents  $I_B$  and the top  $I_F$ . In cases with  $Q < 1$  the observable anisotropy-values ( $A_{\text{Obs}}$ ) need to be corrected by equation (1), where  $F_{\text{SB}}$  is the real bound fraction and  $A_F$  and  $A_B$  are the anisotropy values of free and bound ligand (bottom and top of the fitted curve).

$$F_{\text{SB}} = \frac{A_{\text{Obs}} - A_F}{(A_B - A_{\text{Obs}})Q + A_{\text{Obs}} - A_F} \quad (1)$$

The calculated  $F_{\text{SB}}$ -values were plotted against the logarithmic protein concentration and the inflection point of the fitted curve represents the  $EC_{50F_{\text{SB}}}$  and for the FP-binding assay corresponds to the  $K_D$  value.

#### Competition assay

In a typical competition experiment the fluorescent probe is replaced from the previously formed protein-ligand-complex by titration with increasing amounts of a non-fluorescent competitor, which results in a decreased FP-signal. In this work, the proteins were typically used in the  $EC_{50}$ -concentrations (50% dynamic window) and, in cases with  $\Delta\text{mP} < 100$ , the double  $EC_{50}$  (100% dynamic window). The resulting curve was fitted with four-parameter sigmoidal curve fit and the obtained competitor  $EC_{50}$  was, if necessary, corrected through equation (1) using the  $Q$ -factor previously determined in the binding assay. The corrected  $EC_{50F_{\text{SB}}}$  was transferred into  $K_D$  values using the BotDB  $IC_{50}$ -to- $K_i$  online converter<sup>8</sup>, which is based on equation (2) developed by *Nikolovska-*

*Coleska* and *Wang*,<sup>9</sup> where,  $[I]_{50}$ =concentration of the free inhibitor/competitor at 50% inhibition,  $[L]_{50}$ =concentration of the free labeled ligand at 50% inhibition and  $[P]_0$ =concentration of the free protein at 0% inhibition.

$$K_I = \frac{[I]_{50}}{\left(\frac{[L]_{50}}{K_D} + \frac{[P]_0}{K_D} + 1\right)} \quad (2)$$

Typically, the fluorescent probe with the highest affinity is selected to minimize the amount of consumed protein in the competition experiment.

## 6. Fluorescence Polarization Assay Curves

### 6.1 Binding Assays with 9s-HA-4-5(6)-TAMRA (15)

#### Binding assay: interleukin-8 versus 9s-HA-4-5(6)-TAMRA (15)

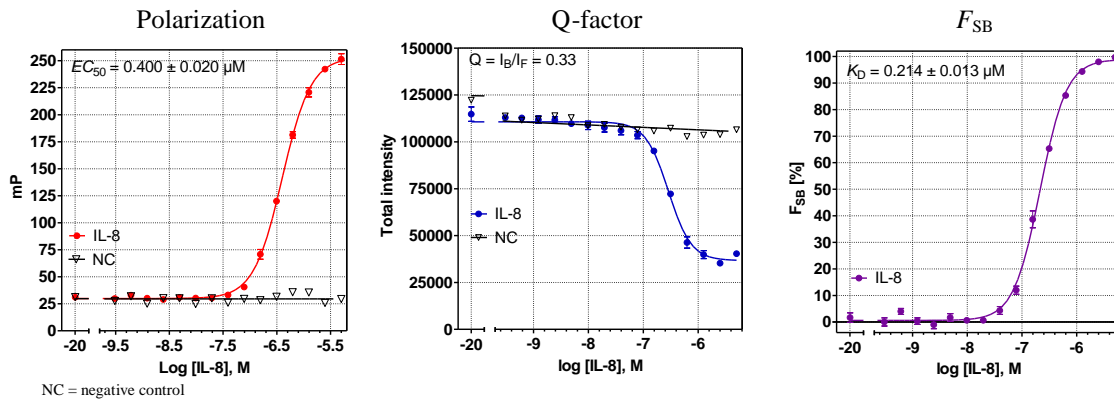

#### Binding assay: interleukin-10 versus 9s-HA-4-5(6)-TAMRA (15)

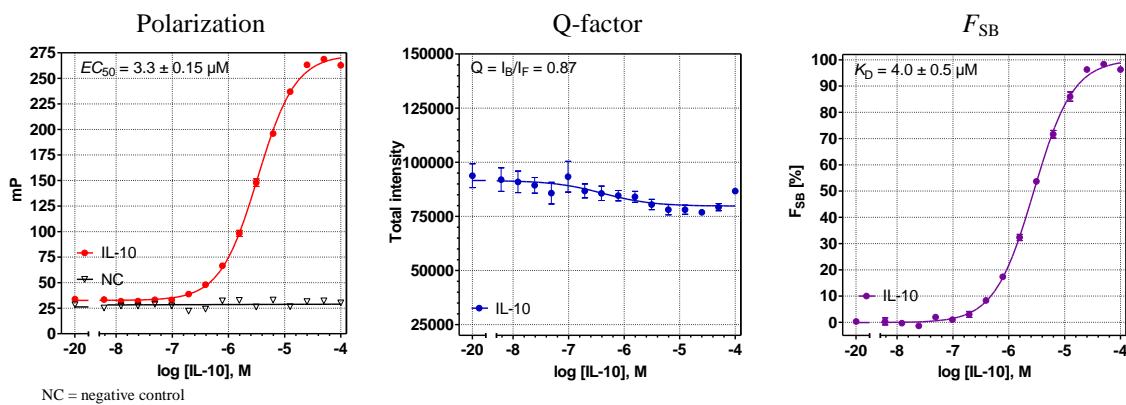

#### Binding assay: bone morphogenetic protein 2 versus 9s-HA-4-5(6)-TAMRA (15)

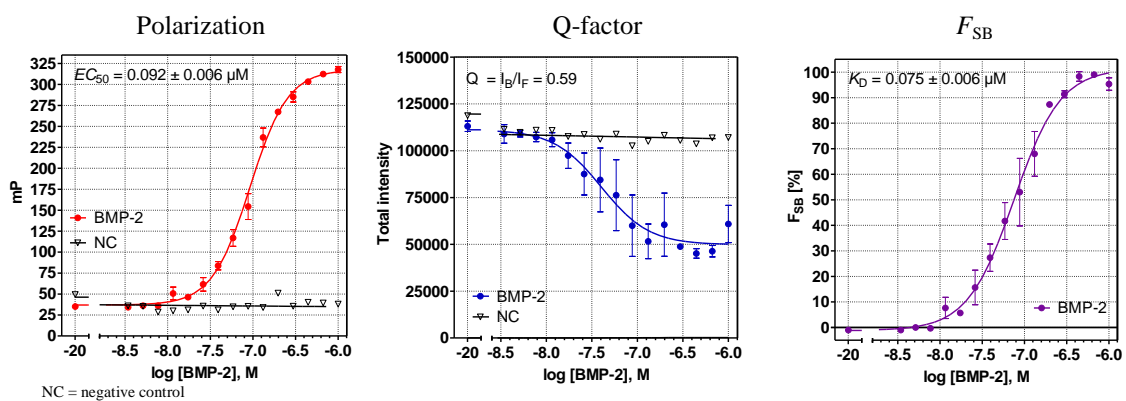

Binding assay: sclerostin versus 9s-HA-4-5(6)-TAMRA (15)

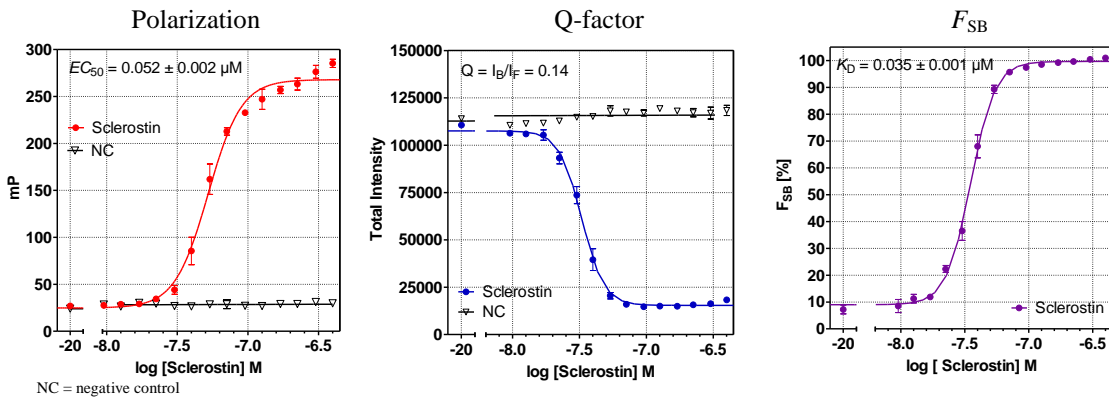

Binding assay: tissue inhibitor of metalloproteinase 3 versus 9s-HA-4-5(6)-TAMRA (15)

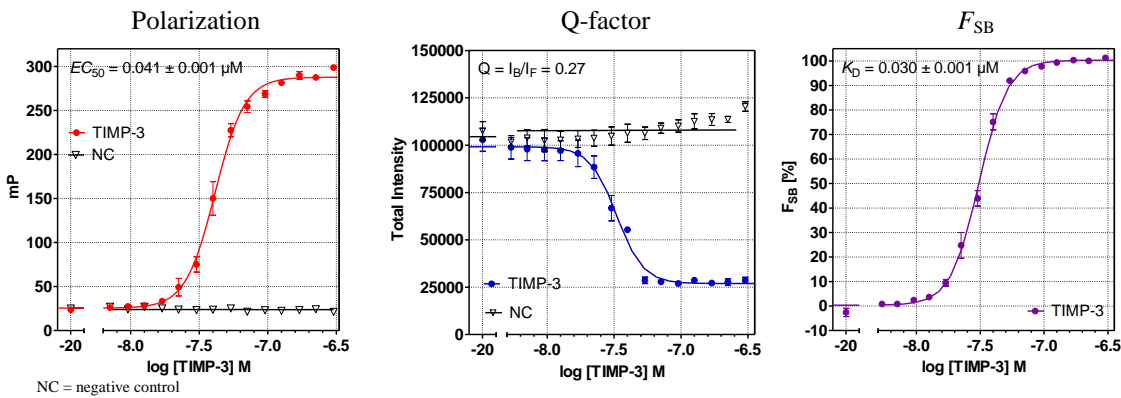

Binding assay: CXCL12 (stromal derived factor, SDF-1) versus 9s-HA-4-5(6)-TAMRA (15)

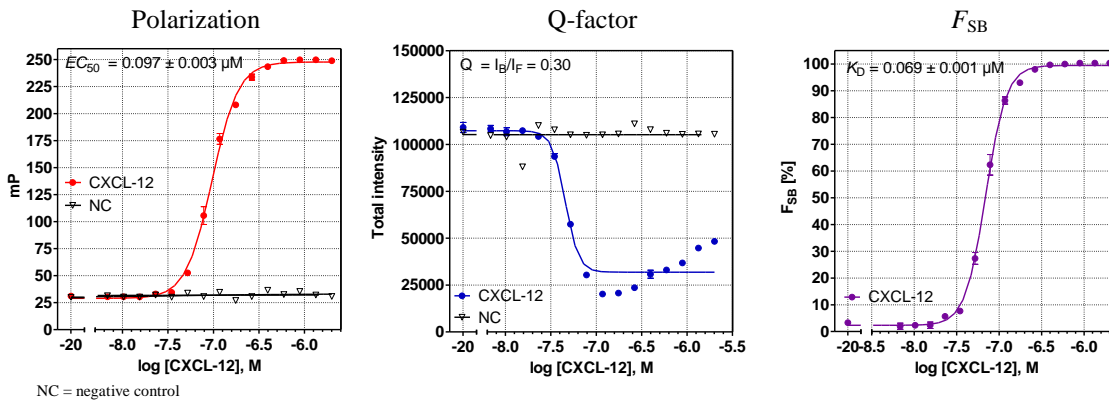

Binding assay: transforming growth factor- $\beta$ 1 versus 9s-HA-4-5(6)-TAMRA (15)

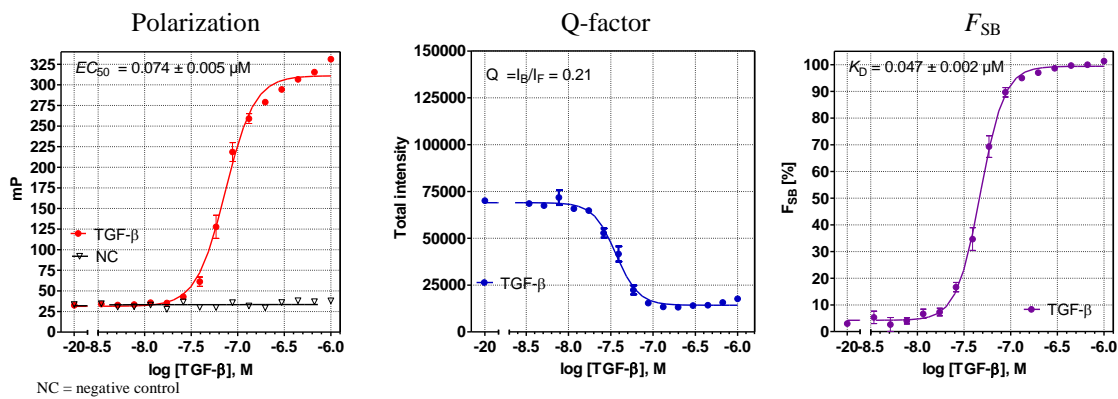

Binding assay: fibroblast growth factor 1 versus 9s-HA-4-5(6)-TAMRA (15)

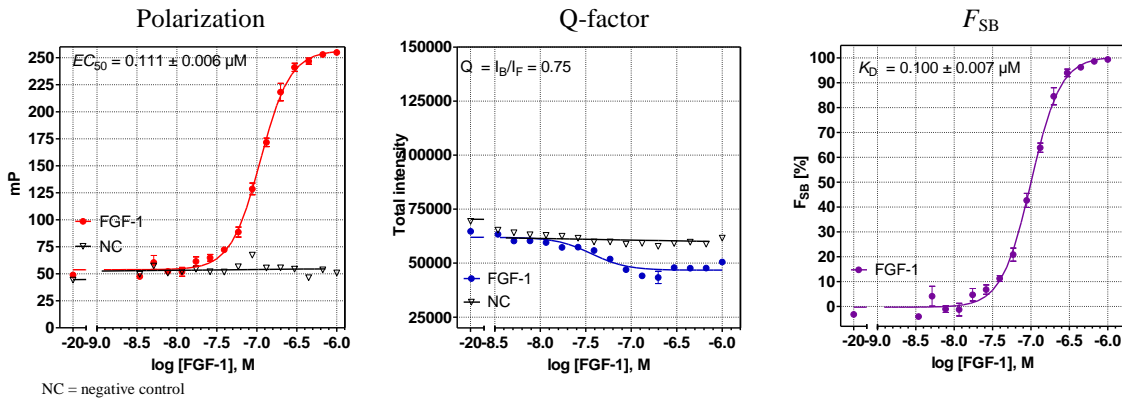

Binding assay: fibroblast growth factor 2 versus 9s-HA-4-5(6)-TAMRA (15)

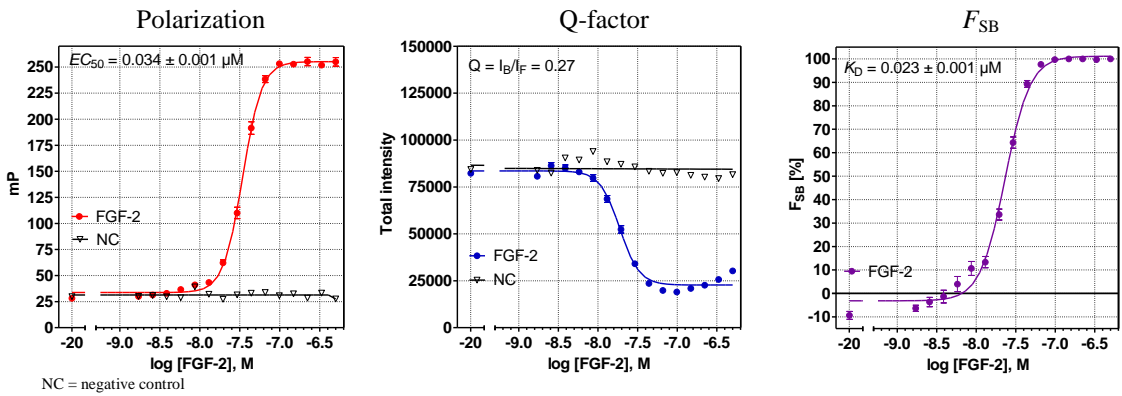

Binding assay: antithrombin III versus 9s-HA-4-5(6)-TAMRA (15)

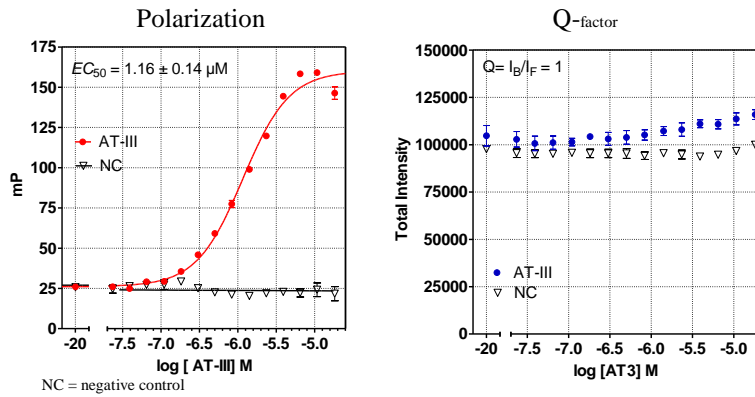

**6.2 Binding Assays with 13s-HA-6-5(6)-TAMRA (19)**

Binding assay: interleukin 8 versus 13s-HA-6-5(6)-TAMRA (19)

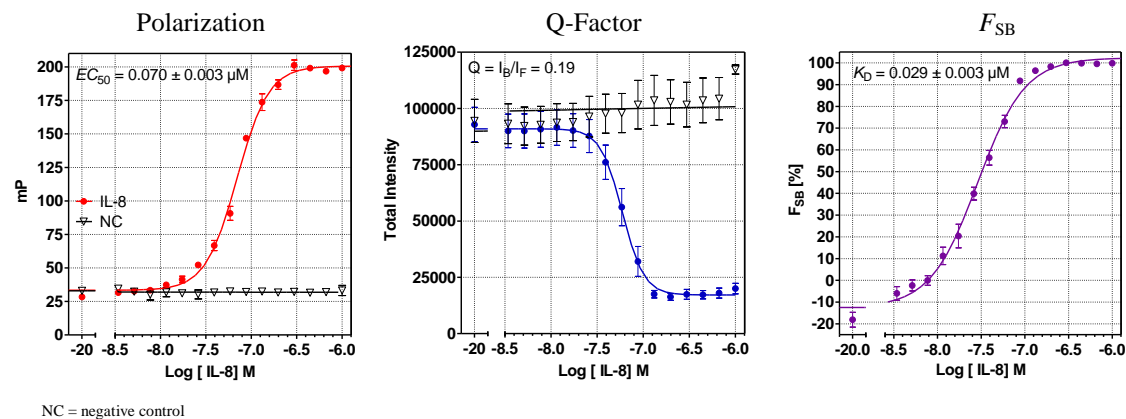

Binding assay: interleukin 10 versus 13s-HA-6-5(6)-TAMRA (19)

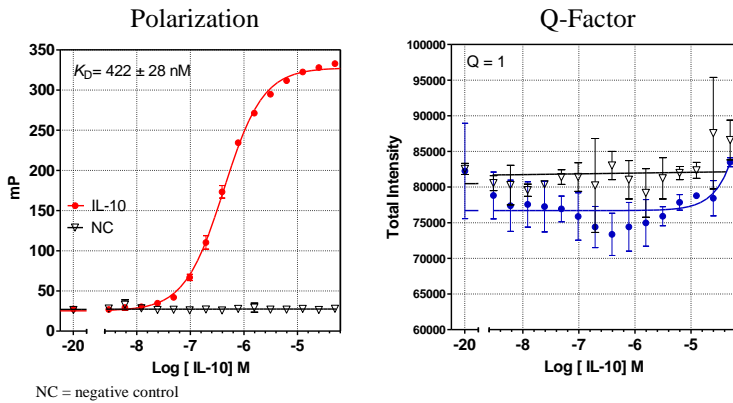

Binding assay: bone morphogenetic protein 2 versus 13s-HA-6-5(6)-TAMRA (19)

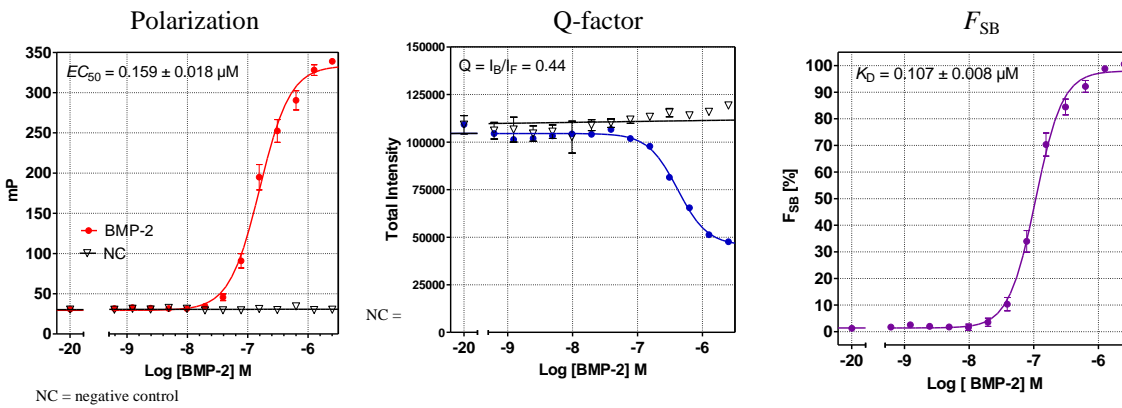

Binding assay: sclerostin versus 13s-HA-6-5(6)-TAMRA (19)

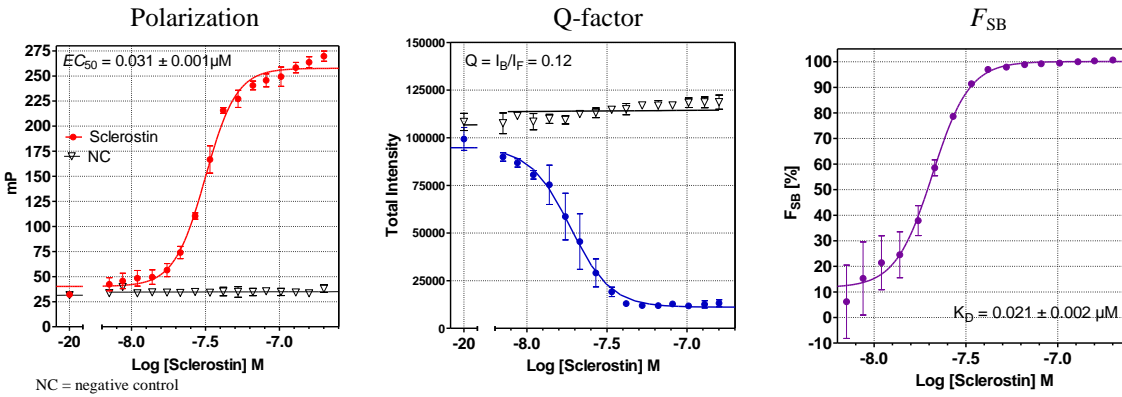

Binding assay: tissue inhibitor of metalloproteinase 3 versus 13s-HA-6-5(6)-TAMRA (19)

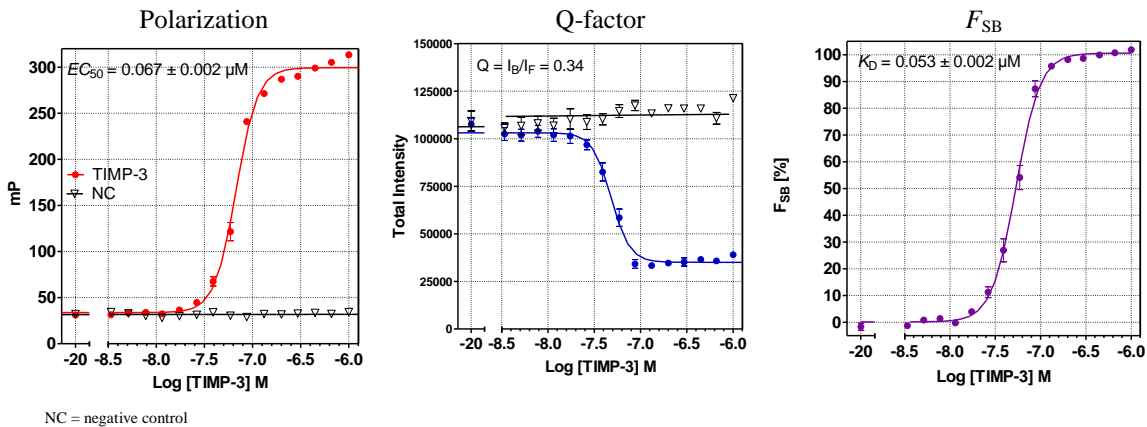

**Binding assay: CXCL12 (stromal derived factor, SDF-1) versus 13s-HA-6-5(6)-TAMRA (19)**

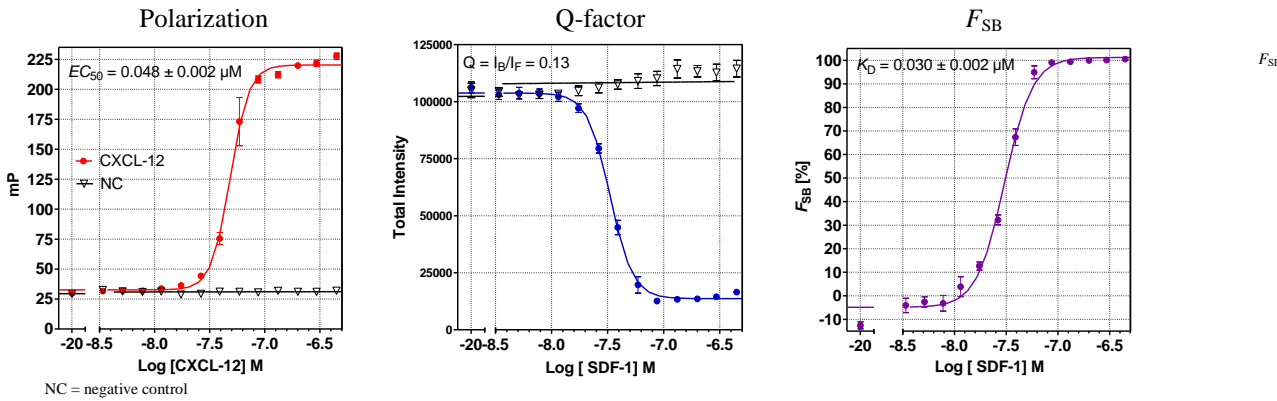

**Binding assay: transforming growth factor- $\beta$ 1 versus 13s-HA-6-5(6)-TAMRA (19)**

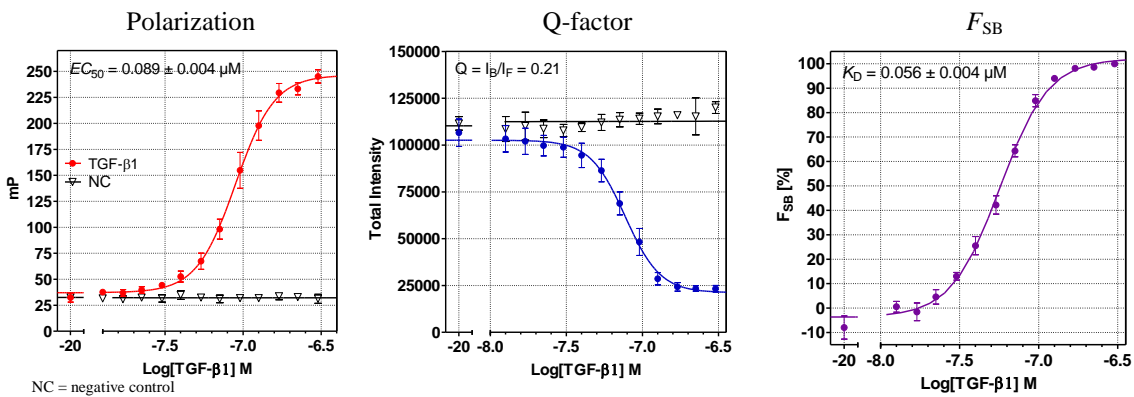

**Binding assay: fibroblast growth factor 1 versus 13s-HA-6-5(6)-TAMRA (19)**

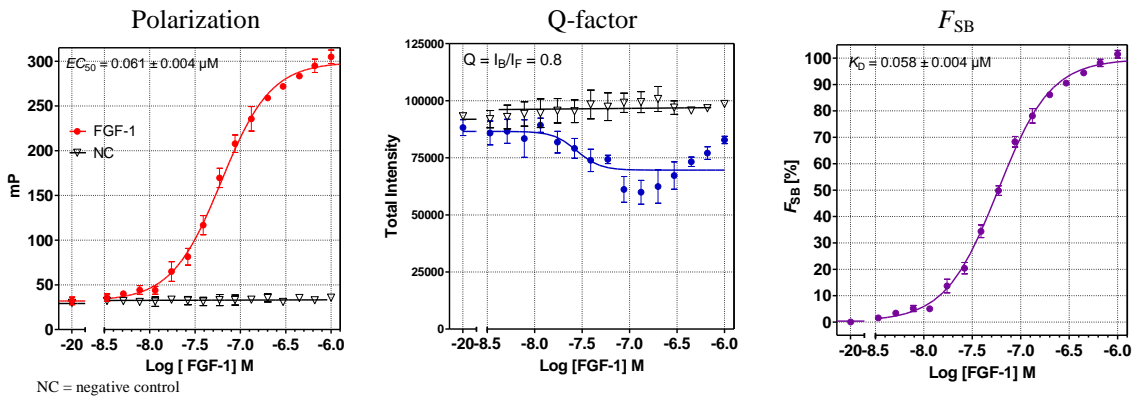

**Binding assay: fibroblast growth factor 2 versus 13s-HA-6-5(6)-TAMRA (19)**

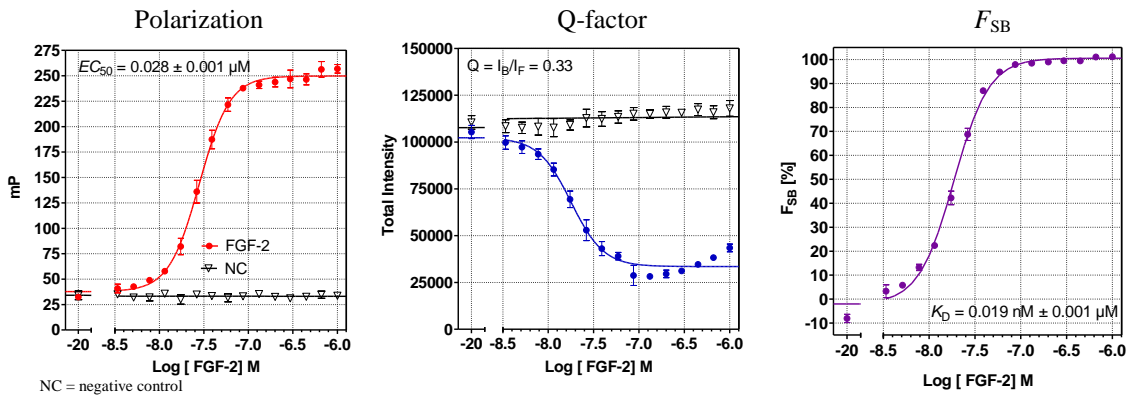



**Binding assay: antithrombine III versus 13s-HA-6-5(6)-TAMRA (19)**

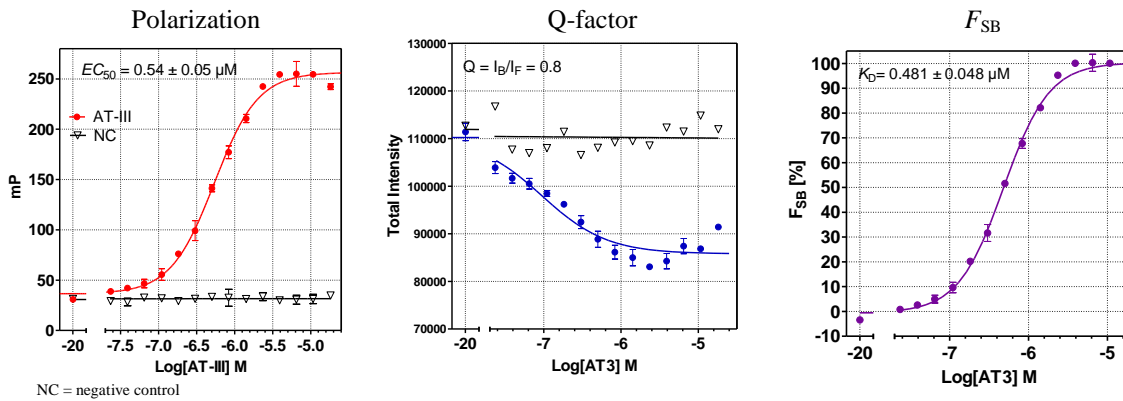

**6.3 Competition Assays with HA-4-N<sub>3</sub> (5)**

**Competition assay: interleukin 8 + 9s-HA-4-5(6)-TAMRA (15) versus HA-4-N<sub>3</sub> (5)**

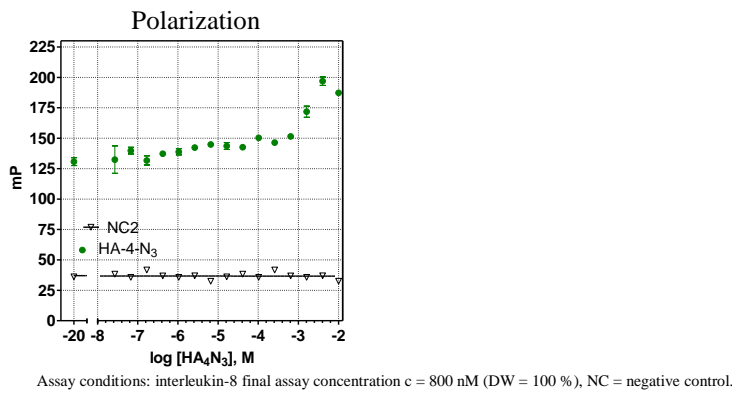

**Competition assay: interleukin 10 + 9s-HA-4-5(6)-TAMRA (15) versus HA-4-N<sub>3</sub> (5)**

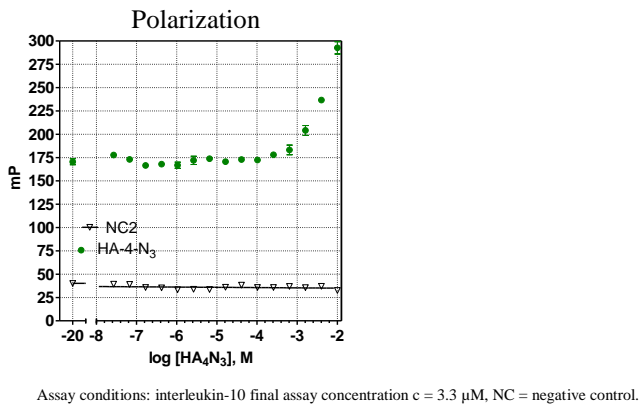

**Competition assay: bone morphogenetic protein 2 + 9s-HA-4-5(6)-TAMRA (15) versus HA-4-N<sub>3</sub> (5)**

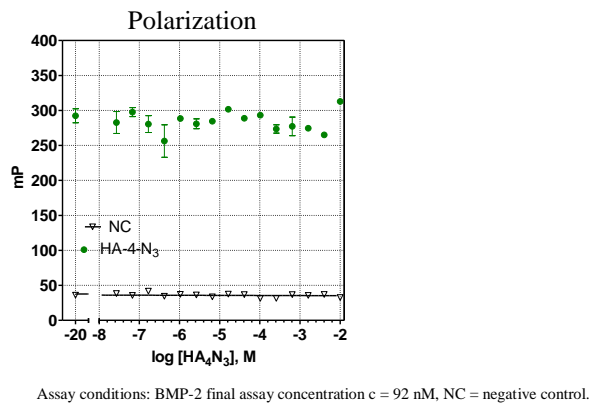

Competition assay: sclerostin + 13s-HA-6-5(6)-TAMRA (19) versus HA-4-N<sub>3</sub> (5)

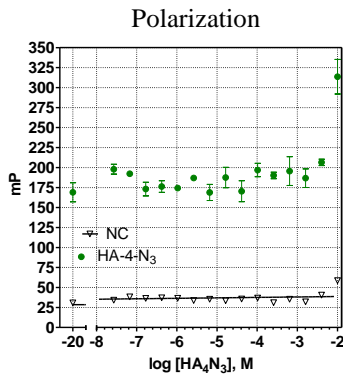

Assay conditions: sclerostin final assay concentration  $c = 35$  nM, NC = negative control.

6.4 Competition Assays with 9s-HA-4-Triazol (16)

Competition assay: interleukin 8 + 13s-HA-6-5(6)-TAMRA (19) versus 9s-HA-4-Triazol (16)

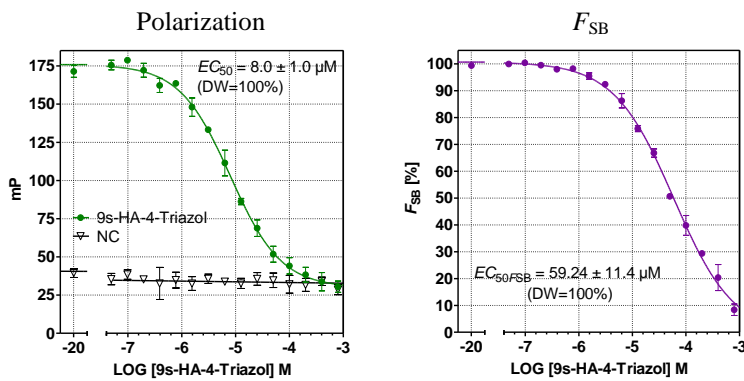

Assay conditions: IL-8 final assay concentration  $c = 140$  nM, DW = dynamic window, NC = negative control

Competition assay: interleukin 10 + 13s-HA-6-5(6)-TAMRA (19) versus 9s-HA-4-Triazol (16)

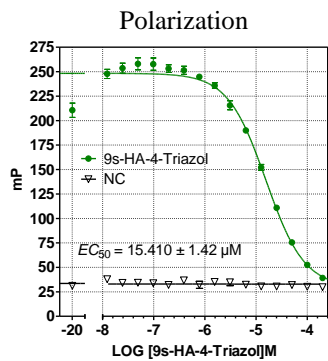

Assay conditions: IL-10 final assay concentration  $c = 422$  nM, DW = dynamic window, NC = negative control

Competition assay: bone morphogenetic protein 2 + 9s-HA-4-5(6)-TAMRA (15) versus 9s-HA-4-Triazol (16)

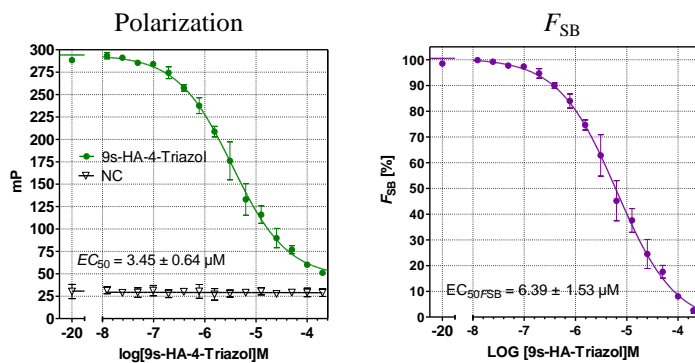

Assay conditions: BMP-2 final assay concentration  $c = 92$  nM, DW = dynamic window, NC = negative control

Competition assay: sclerostin + 13s-HA-6-5(6)-TAMRA (19) versus 9s-HA-4-Triazol (16)

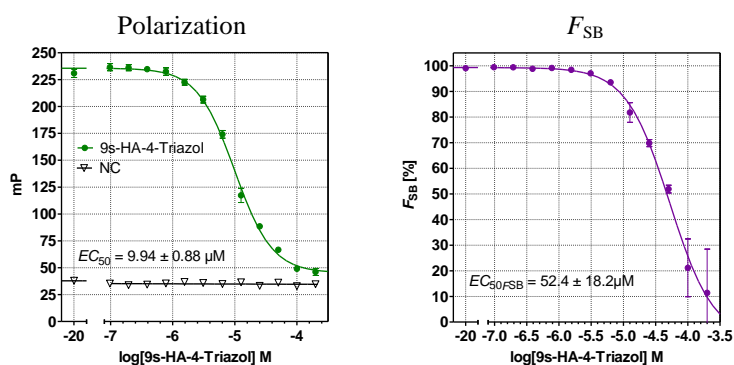

Assay conditions: sclerostin final assay concentration  $c = 31 \text{ nM}$ , NC = negative control

Competition assay: TIMP-3 + 9s-HA-4-5(6)-TAMRA (15) versus 9s-HA-4-Triazol (16)

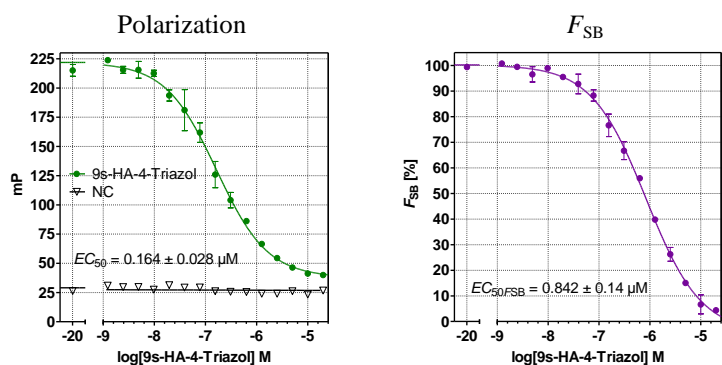

Assay conditions: TIMP-3 final assay concentration  $c = 41 \text{ nM}$ , NC = negative control.

6.5 Competition Assays with 9s-HA-4-SMe (17)

Competition assay: interleukin 8 + 13s-HA-6-5(6)-TAMRA (19) versus 9s-HA-4-SMe (17)

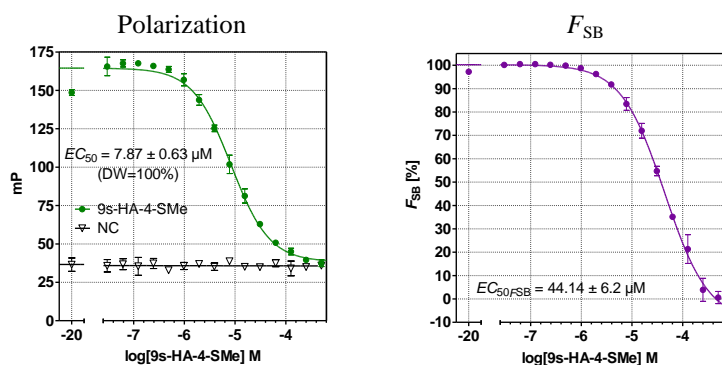

Assay conditions: IL-8 final assay concentration  $c = 140 \text{ nM}$ , DW = dynamic window, NC = negative control

Competition assay: interleukin 10 + 13s-HA-6-5(6)-TAMRA (19) versus 9s-HA-4-SMe (17)

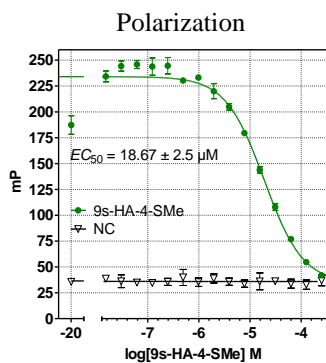

Assay conditions: IL-10 final assay concentration  $c = 422 \text{ nM}$ , DW = dynamic window, NC = negative control

**Competition assay: bone morphogenetic protein 2 + 9s-HA-4-5(6)-TAMRA (15) versus 9s-HA-4-SMe (17)**

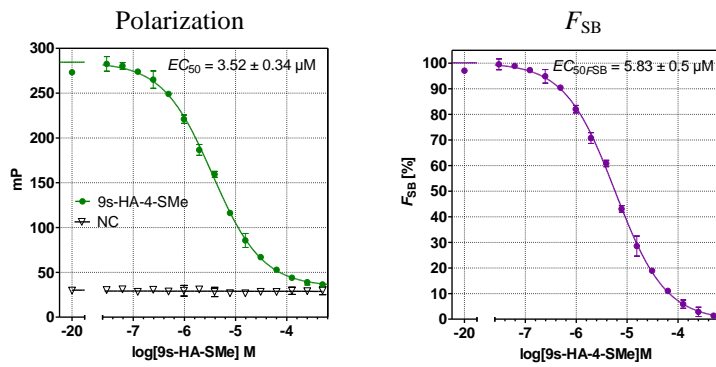

Assay conditions: BMP-2 final assay concentration  $c = 92 \text{ nM}$ , DW = dynamic window, NC = negative control

**Competition assay: sclerostin + 13s-HA-6-5(6)-TAMRA (19) versus 9s-HA-4-SMe (17)**

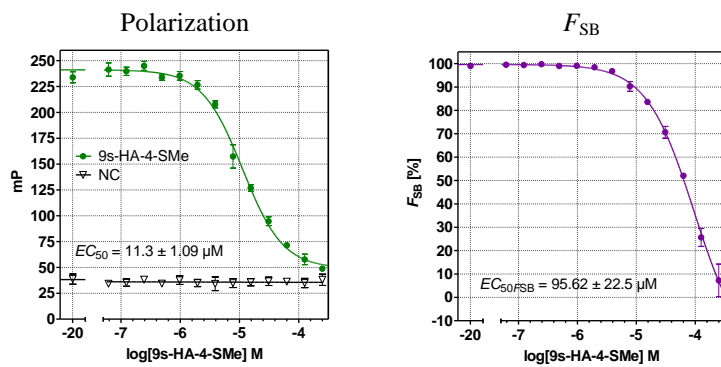

Assay conditions: sclerostin final assay concentration  $c = 31 \text{ nM}$ , NC = negative control

**Competition assay: TIMP 3 + 9s-HA-4-5(6)-TAMRA (15) versus 9s-HA-4-SMe (17)**

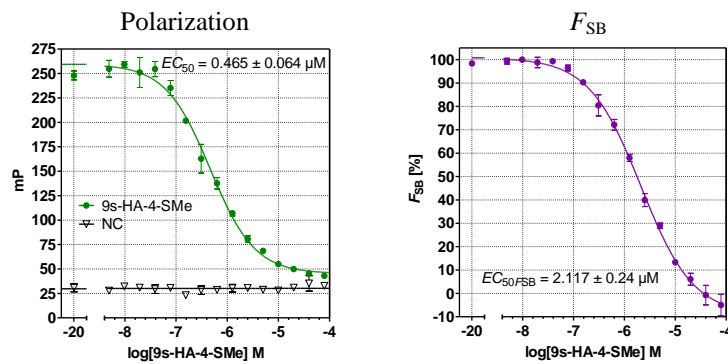

Assay conditions: TIMP-3 final assay concentration  $c = 41 \text{ nM}$ , NC = negative control

**6.6 Competition Assays with 9s-HA-4-H,H (18)**

**Competition assay: interleukin 8 + 13s-HA-6-5(6)-TAMRA (19) versus 9s-HA-4-H,H (18)**

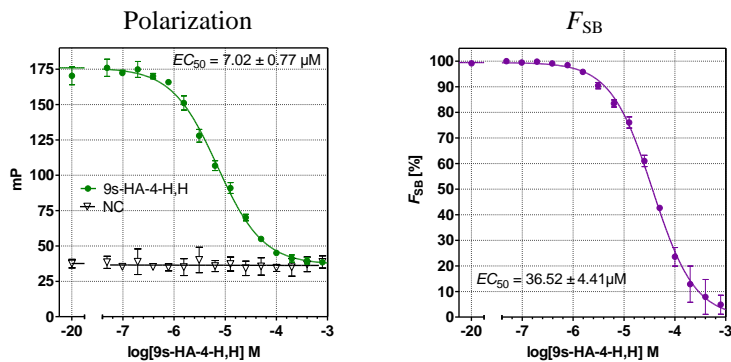

Assay conditions: IL-8 final assay concentration  $c = 140 \text{ nM}$ , DW = dynamic window, NC = negative control

Competition assay: interleukin 10 + 13s-HA-6-5(6)-TAMRA (19) versus 9s-HA-4-H,H (18)

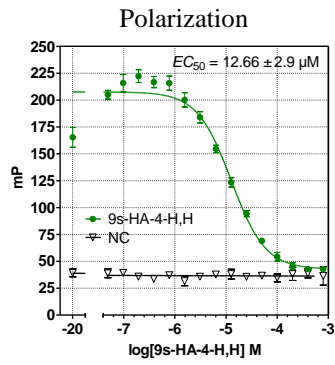

Assay conditions: IL-10 final assay concentration  $c = 422$  nM, DW = dynamic window, NC = negative control

Competition assay: bone morphogenetic protein 2 + 9s-HA-4-5(6)-TAMRA (15) versus 9s-HA-4-H,H (18)

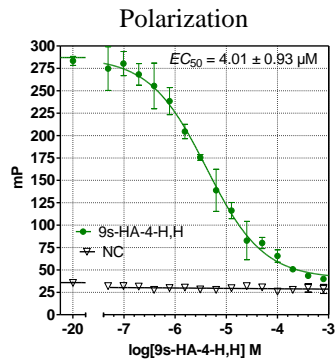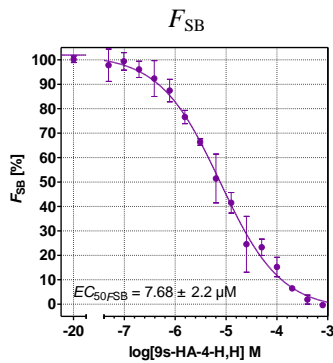

Assay conditions: BMP-2 final assay concentration  $c = 92$  nM, DW = dynamic window, NC = negative control

Competition assay: sclerostin + 13s-HA-6-5(6)-TAMRA (19) versus 9s-HA-4-H,H (18)

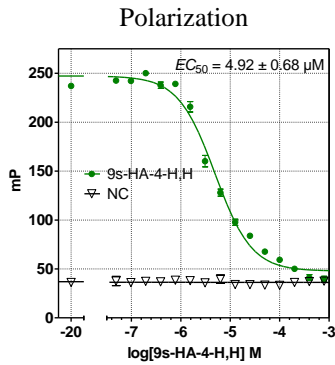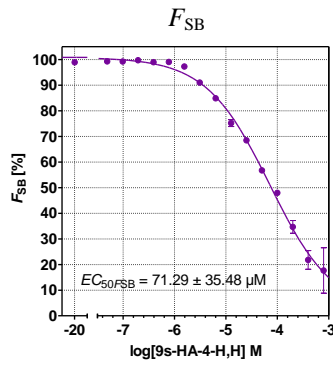

Assay conditions: sclerostin final assay concentration  $c = 31$  nM, NC = negative control

Competition assay: TIMP 3 + 9s-HA-4-5(6)-TAMRA (15) versus 9s-HA-4-H,H (18)

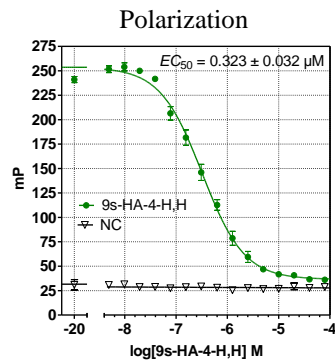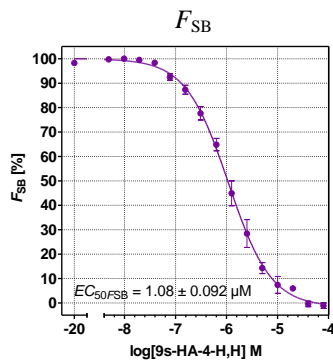

Assay conditions: TIMP-3 final assay concentration  $c = 41$  nM, NC = negative control

## 6.7 Competition Assays with (9s-HA-4-S-PEG-S)<sub>2</sub> (20)

Competition assay: interleukin 8 + 13s-HA-6-5(6)-TAMRA (19) versus (9s-HA-4-S-PEG-S)<sub>2</sub> (20)

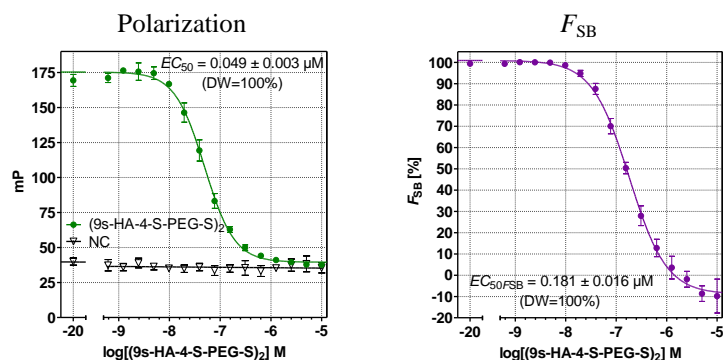

Assay conditions: IL-8 final assay concentration  $c = 140$  nM, DW = dynamic window, NC = negative control

Competition assay: interleukin 10 + 13s-HA-6-5(6)-TAMRA (19) versus (9s-HA-4-S-PEG-S)<sub>2</sub> (20)

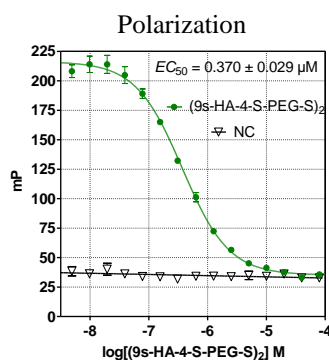

Assay conditions: IL-10 final assay concentration  $c = 422$  nM, NC = negative control

Competition assay: BMP-2 + 9s-HA-4-5(6)-TAMRA (15) versus (9s-HA-4-S-PEG-S)<sub>2</sub> (20)

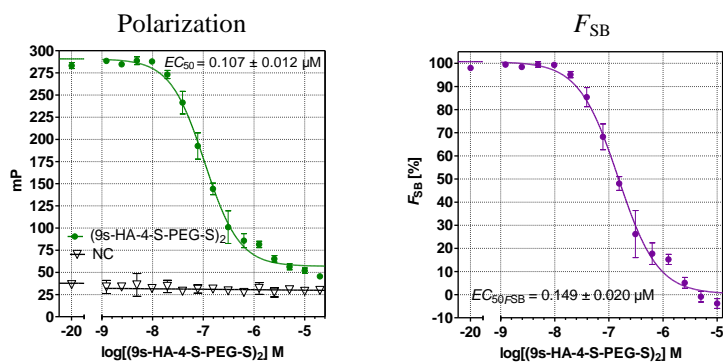

Assay conditions: BMP-2 final assay concentration  $c = 92$  nM, DW = dynamic window, NC = negative control

Competition assay: sclerostin + 13s-HA-6-5(6)-TAMRA (19) versus (9s-HA-4-S-PEG-S)<sub>2</sub> (20)

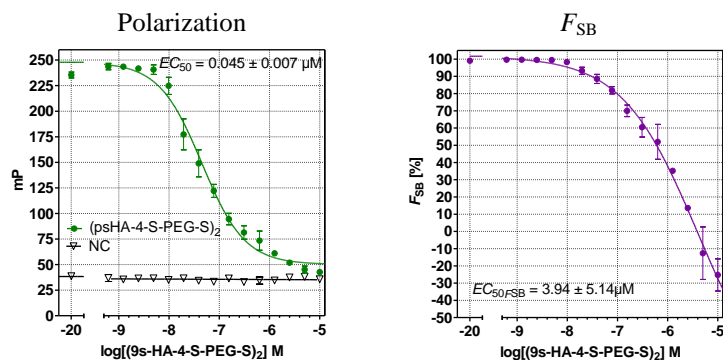

Assay conditions: sclerostin final assay concentration  $c = 31$  nM, NC = negative control

Competition assay: TIMP 3 + 9s-HA-4-5(6)-TAMRA (15) versus (9s-HA-4-S-PEG-S)<sub>2</sub> (20)

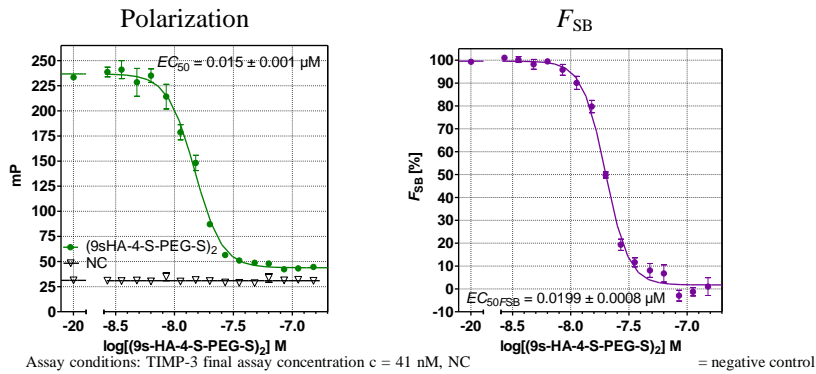

6.8 Competition Assays with 2s-HA-4-N<sub>3</sub> (21)

Competition assay: interleukin 8 + 9s-HA-4-5(6)-TAMRA (15) versus 2s-HA-4-N<sub>3</sub> (21)

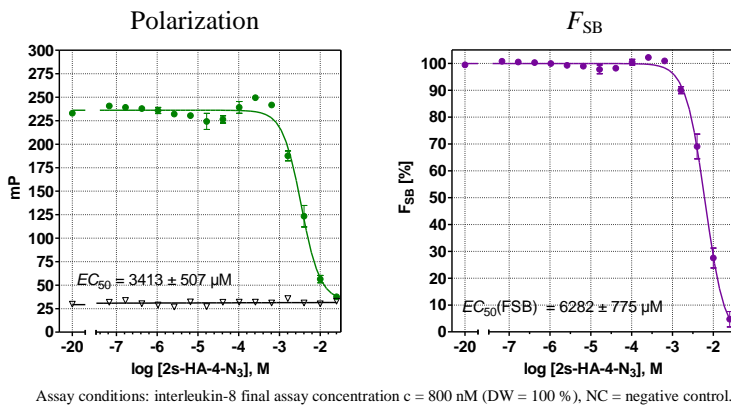

Competition assay: interleukin 10 + 9s-HA-4-5(6)-TAMRA (15) versus 2s-HA-4-N<sub>3</sub> (21)

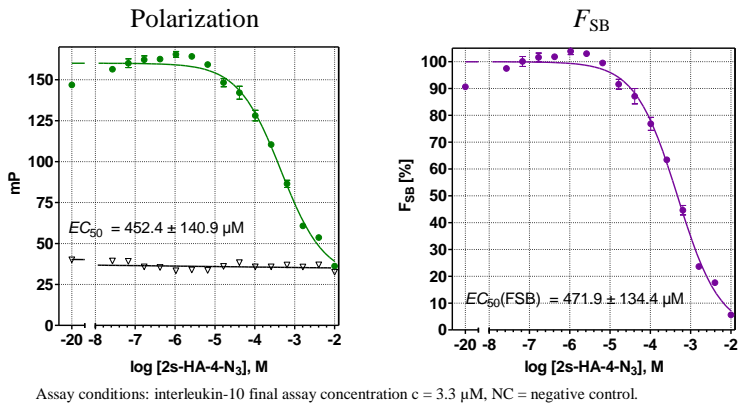

Competition assay: bone morphogenetic protein 2 + 9s-HA-4-5(6)-TAMRA (15) versus 2s-HA-4-N<sub>3</sub> (21)

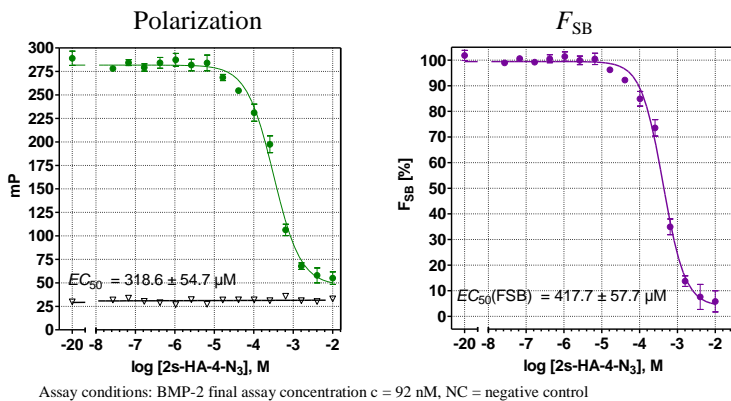

Competition assay: sclerostin + 13s-HA-6-5(6)-TAMRA (19) versus 2s-HA-4-N<sub>3</sub> (21)

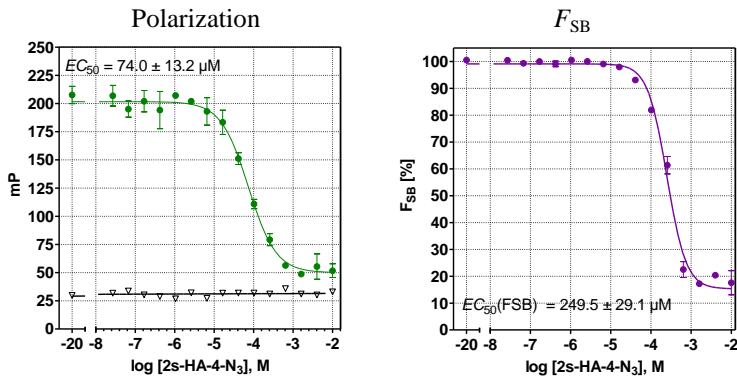

Assay conditions: sclerostin final assay concentration  $c = 35 \text{ nM}$ , NC = negative control.

6.9 Competition Assays with 5s-HA-4-N<sub>3</sub> (22)

Competition assay: interleukin 8 + 9s-HA-4-5(6)-TAMRA (15) versus 5s-HA-4-N<sub>3</sub> (22)

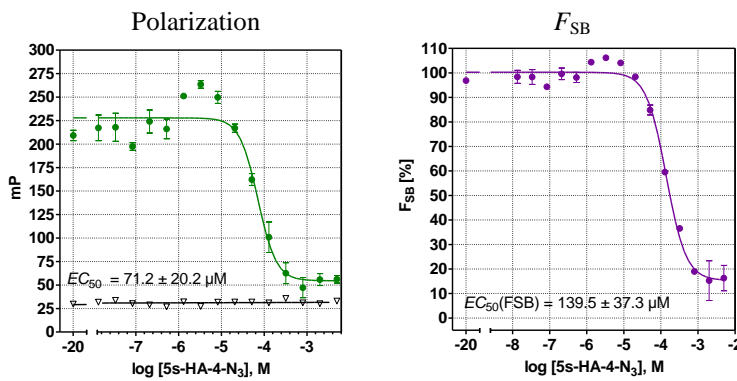

Assay conditions: interleukin-8 final assay concentration  $c = 800 \text{ nM}$  (DW = 100 %), NC = negative control

Competition assay: interleukin 10 + 9s-HA-4-5(6)-TAMRA (15) versus 5s-HA-4-N<sub>3</sub> (22)

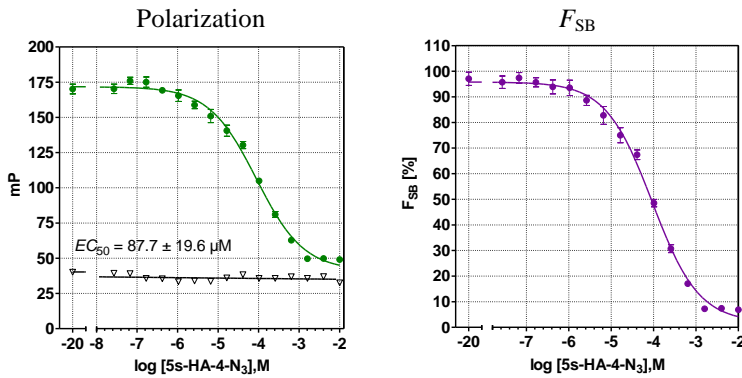

Assay conditions: interleukin-10 final assay concentration  $c = 3.3 \mu\text{M}$ , NC = negative control.

Competition assay: BMP-2 + 9s-HA-4-5(6)-TAMRA (15) versus 5s-HA-4-N<sub>3</sub> (22)

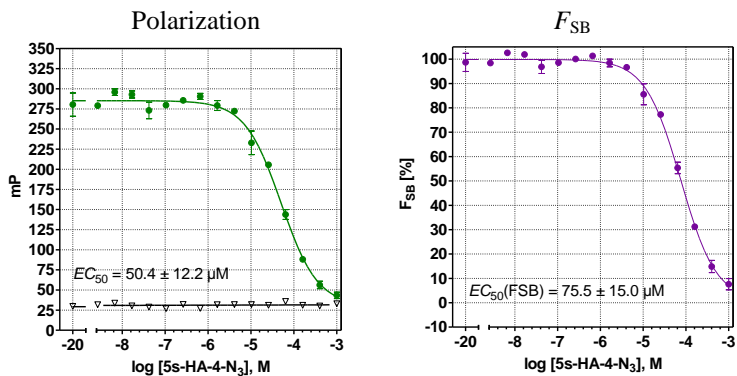

Assay conditions: BMP-2 final assay concentration  $c = 92 \text{ nM}$ , NC = negative control.



Competition assay: sclerostin + 13s-HA-6-5(6)-TAMRA (19) versus 5s-HA-4-N<sub>3</sub> (22)

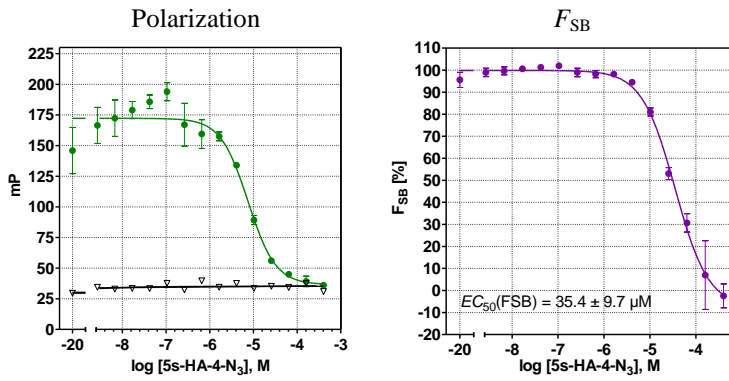

Assay conditions: sclerostin final assay concentration  $c = 35$  nM, NC = negative control.

**6.10 Competition Assays with 7s-HA-4-N<sub>3</sub> (23)**

Competition assay: interleukin 8 + 9s-HA-4-5(6)-TAMRA (15) versus 7s-HA-4-N<sub>3</sub> (23)

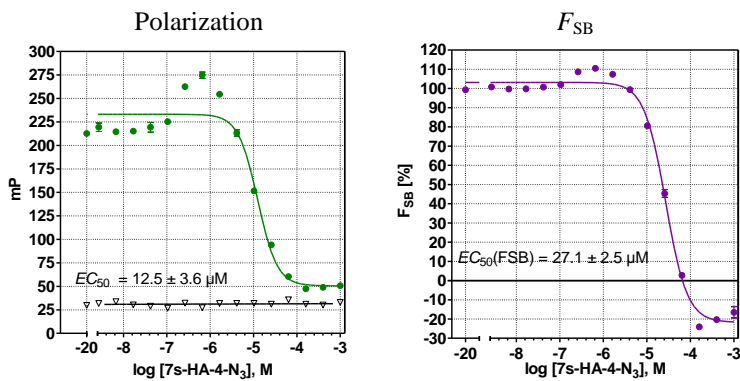

Assay conditions: interleukin-8 final assay concentration  $c = 800$  nM (DW = 100 %), NC = negative control.

Competition assay: interleukin 10 + 9s-HA-4-5(6)-TAMRA (15) versus 7s-HA-4-N<sub>3</sub> (23)

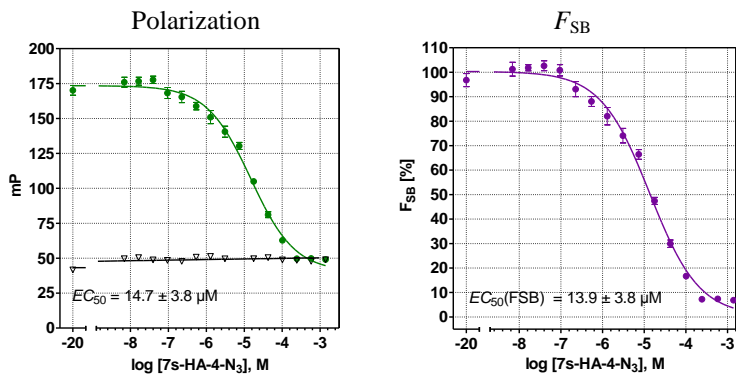

Assay conditions: interleukin-10 final assay concentration  $c = 3.3$  μM, NC = negative control.

Competition assay: BMP-2 + 9s-HA-4-5(6)-TAMRA (15) versus 7s-HA-4-N<sub>3</sub> (23)

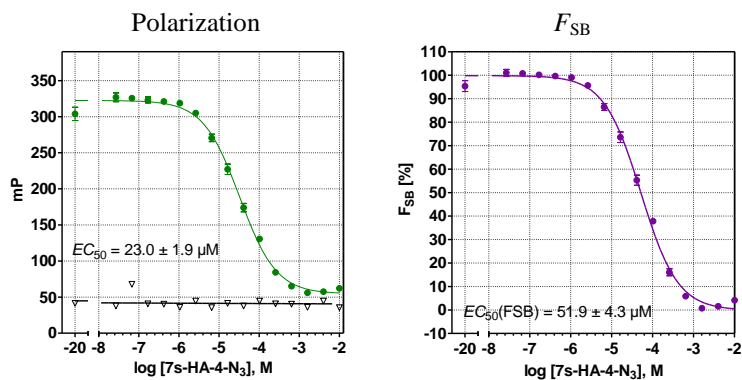

Assay conditions: BMP-2 final assay concentration  $c = 92$  nM, NC = negative control.

Competition assay: sclerostin + 13s-HA-6-5(6)-TAMRA (19) versus 7s-HA-4-N<sub>3</sub> (23)

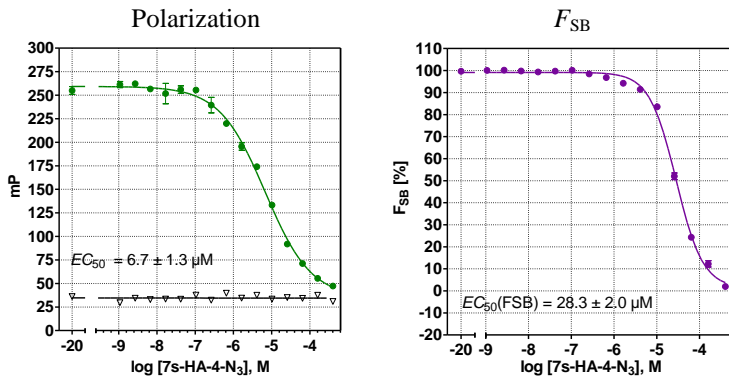

6.11 Competition Assays with 5s-HA-2-N<sub>3</sub> (24)

Competition assay: interleukin 8 + 9s-HA-4-5(6)-TAMRA (15) versus 5s-HA-2-N<sub>3</sub> (24)

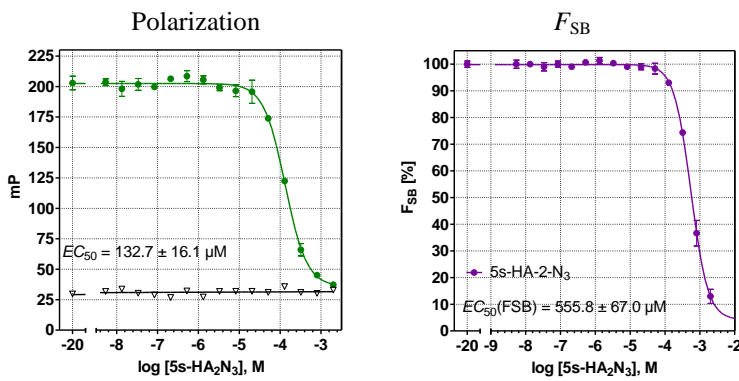

Competition assay: interleukin 10 + 9s-HA-4-5(6)-TAMRA (15) versus 5s-HA-2-N<sub>3</sub> (24)

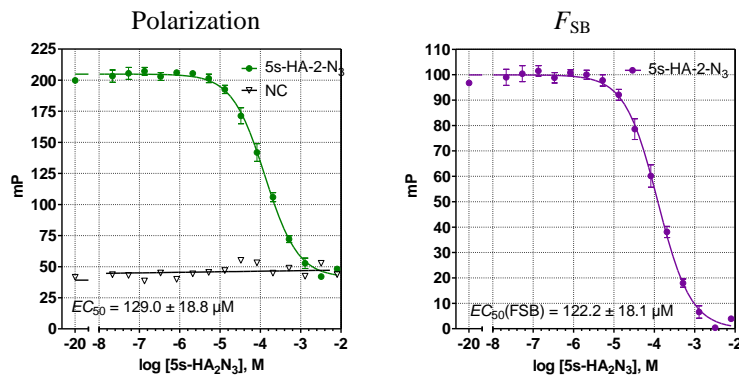

Competition assay: bone morphogenetic protein 2 + 9s-HA-4-5(6)-TAMRA (15) versus 5s-HA-2-N<sub>3</sub> (24)

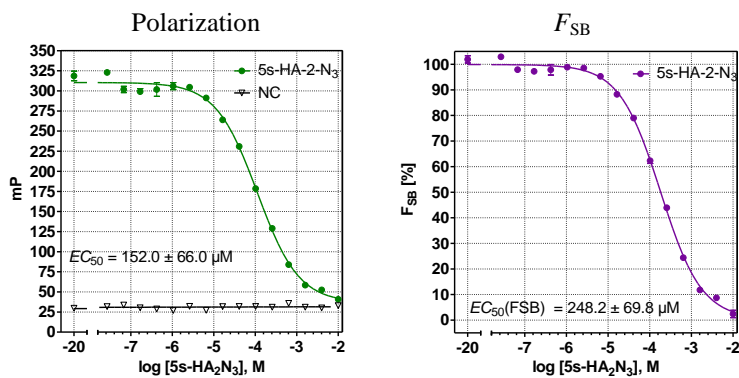

Competition assay: sclerostin + 13s-HA-6-5(6)-TAMRA (19) versus 5s-HA-2-N<sub>3</sub> (24)

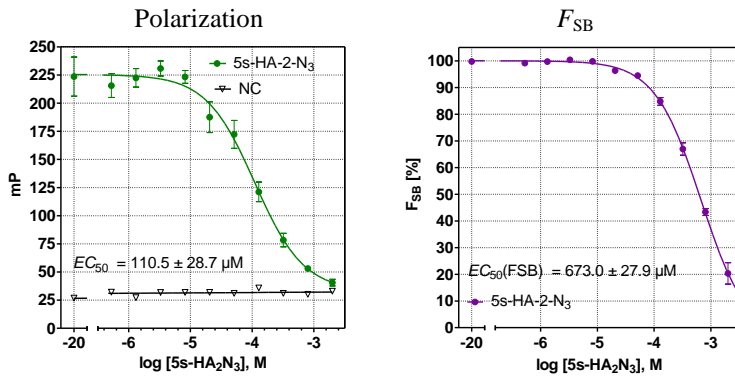

Assay conditions: sclerostin final assay concentration  $c = 35$  nM, NC = negative control.

6.12 Competition Assays with 9s-HA-4-N<sub>3</sub> (25)

Competition assay: interleukin 8 + 9s-HA-4-5(6)-TAMRA (15) versus 9s-HA-4-N<sub>3</sub> (25)

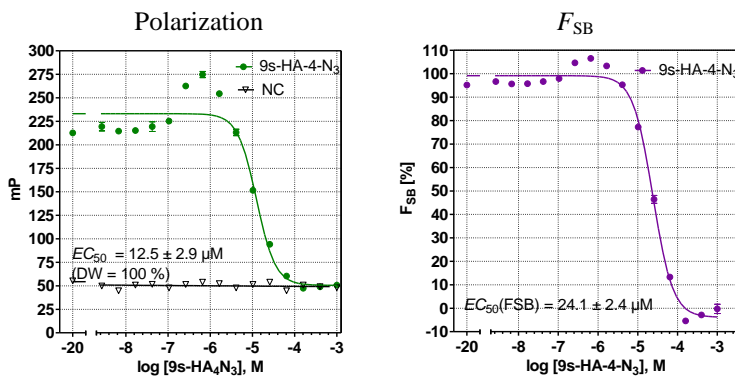

Assay conditions: interleukin-8 final assay concentration  $c = 800$  nM (DW = 100 %), NC = negative control.

Competition assay: interleukin 10 + 9s-HA-4-5(6)-TAMRA (15) versus 9s-HA-4-N<sub>3</sub> (25)

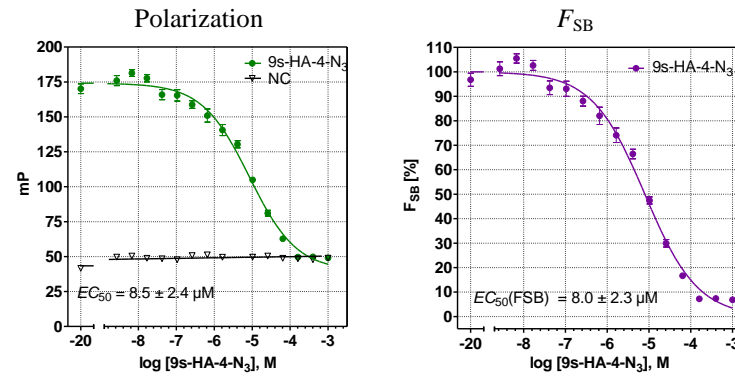

Assay conditions: interleukin-10 final assay concentration  $c = 3.3$  μM, NC = negative control

Competition assay: bone morphogenetic protein 2 + 9s-HA-4-5(6)-TAMRA (15) versus 9s-HA-4-N<sub>3</sub> (25)

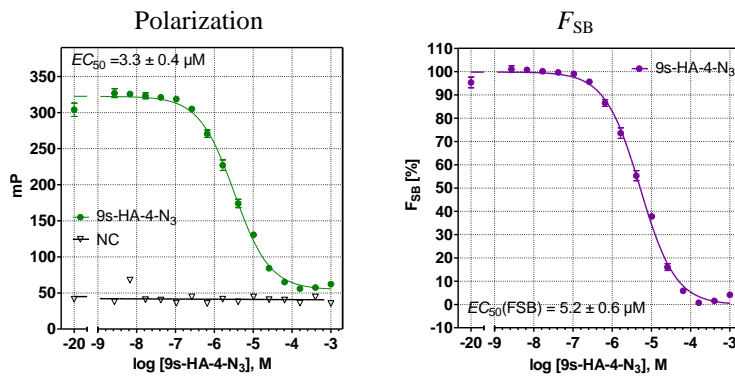

Assay conditions: BMP-2 final assay concentration  $c = 92$  nM, NC = negative control.

Competition assay: sclerostin + 9s-HA-4-5(6)-TAMRA (15) versus 9s-HA-4-N<sub>3</sub> (25)

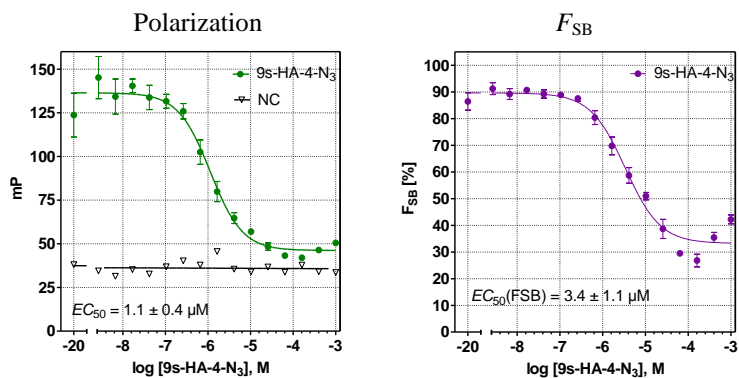

Assay conditions: sclerostin final assay concentration  $c = 52$  nM, NC = negative control.

Competition assay: tissue inhibitor of metalloproteinase 3 + 9s-HA-4-5(6)-TAMRA (15) versus 9s-HA-4-N<sub>3</sub> (25)

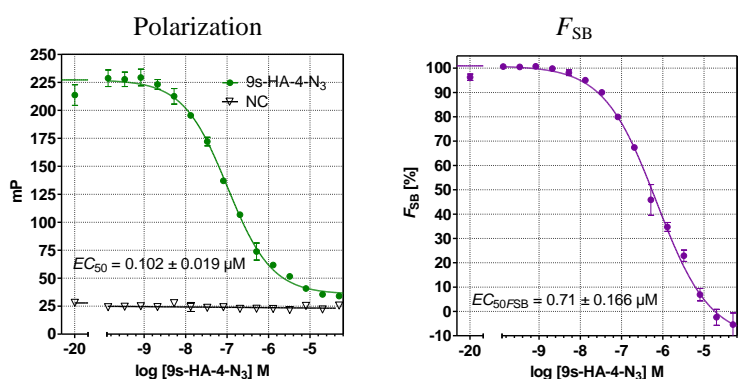

Assay conditions: TIMP-3 final assay concentration  $c = 41$  nM, NC = negative control

Competition assay: CXCL12 (stromal derived factor) + 9s-HA-4-5(6)-TAMRA (15) versus 9s-HA-4-N<sub>3</sub> (25)

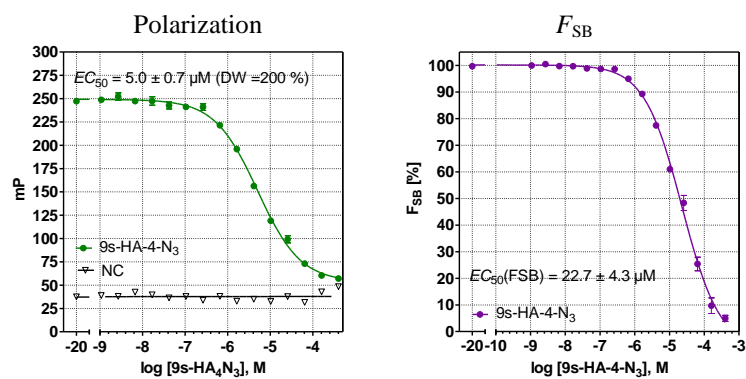

Assay conditions: CXCL12 final assay concentration  $c = 388$  nM (DW = 200 %), NC = negative control.

Competition assay: transforming growth factor-β1 + 9s-HA-4-5(6)-TAMRA (15) versus 9s-HA-4-N<sub>3</sub> (25)

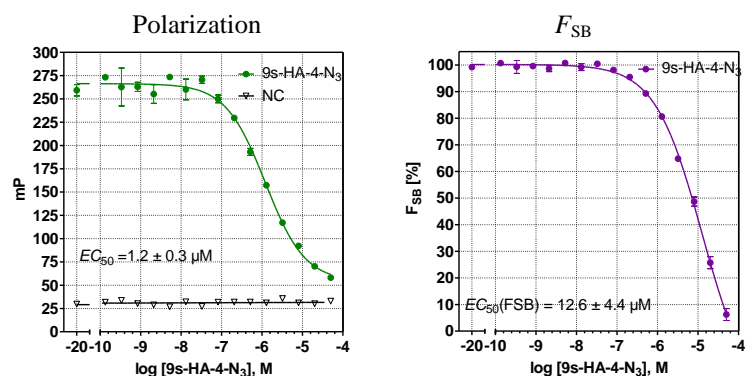

Assay conditions: TGF-β final assay concentration  $c = 74$  nM, NC = negative control.

Competition assay: fibroblast growth factor 1 + 9s-HA-4-5(6)-TAMRA (15) versus 9s-HA-4-N<sub>3</sub> (25)

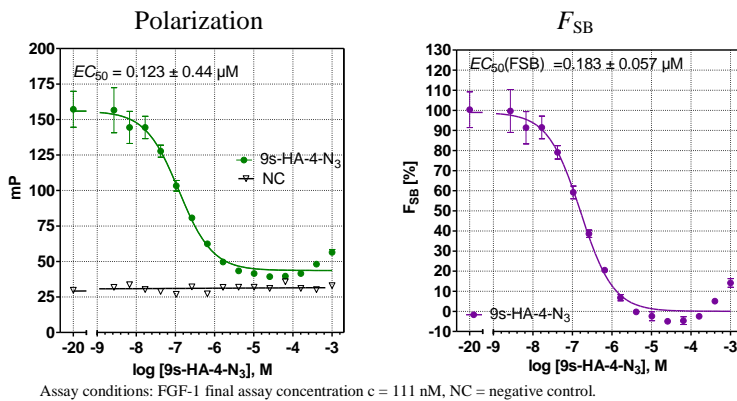

Competition assay: fibroblast growth factor 2 + 9s-HA-4-5(6)-TAMRA (15) versus 9s-HA-4-N<sub>3</sub> (25)

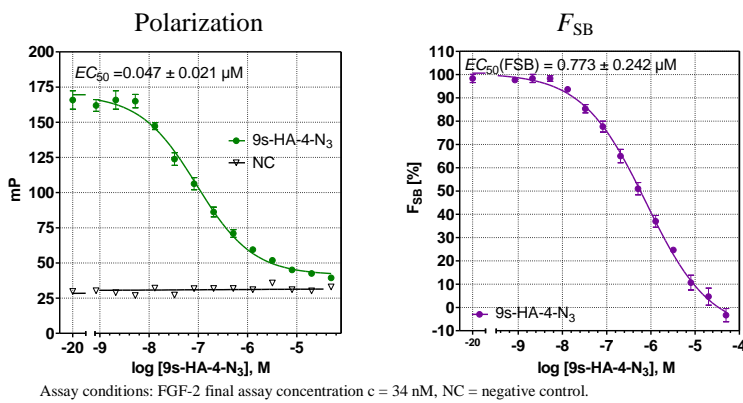

Competition assay: transforming growth factor-β1 + 9s-HA-4-5(6)-TAMRA (15) versus 9s-HA-4-N<sub>3</sub> (25)

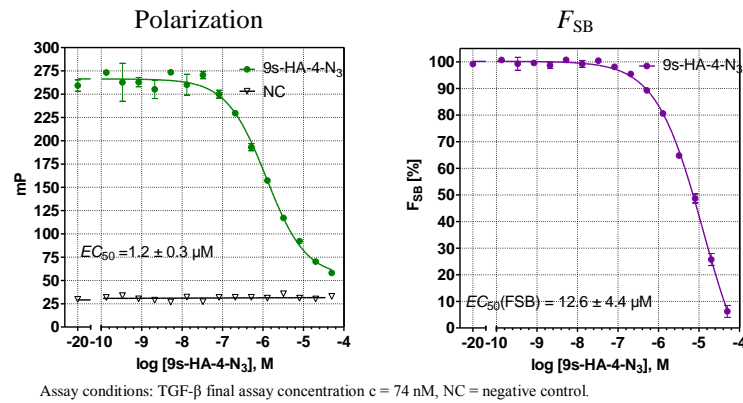

Competition assay: antithrombin III + 13s-HA-6-5(6)-TAMRA (19) versus 9s-HA-4-N<sub>3</sub> (25)

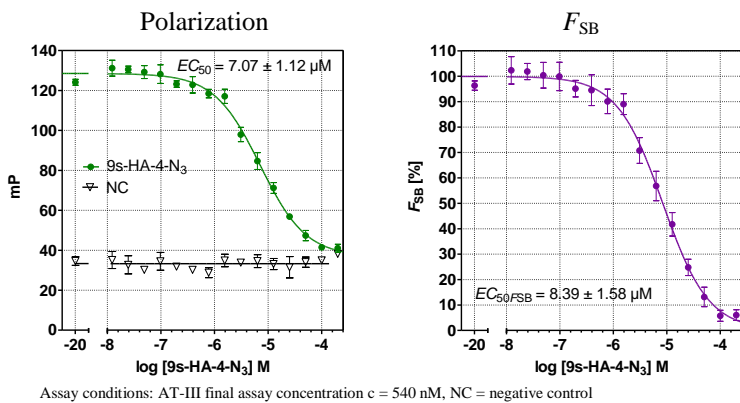

### 6.13 Competition Assays with 13s-HA-6-N<sub>3</sub> (26)

Competition assay: interleukin 8 + 13s-HA-6-5(6)-TAMRA (19) versus 13s-HA-6-N<sub>3</sub> (26)

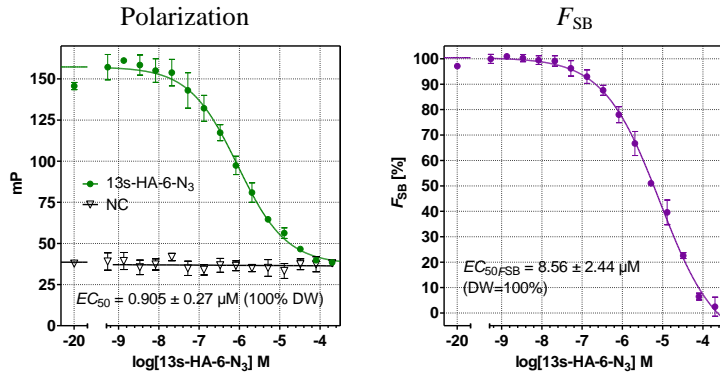

Conditions: c(IL-8) = 140 nM, DW = dynamic window, NC = negative control

Competition assay: interleukin 10 + 13s-HA-6-5(6)-TAMRA (19) versus 13s-HA-6-N<sub>3</sub> (26)

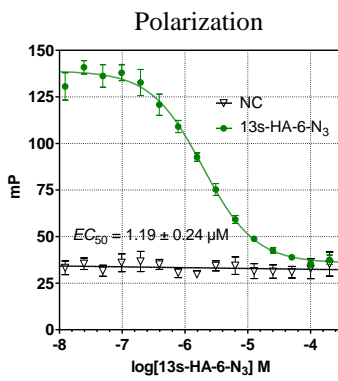

Assay conditions: IL-10 final assay concentration c = 422 nM, NC = negative control

Competition assay: CXCL12 + 13s-HA-6-5(6)-TAMRA (19) versus 13s-HA-6-N<sub>3</sub> (26)

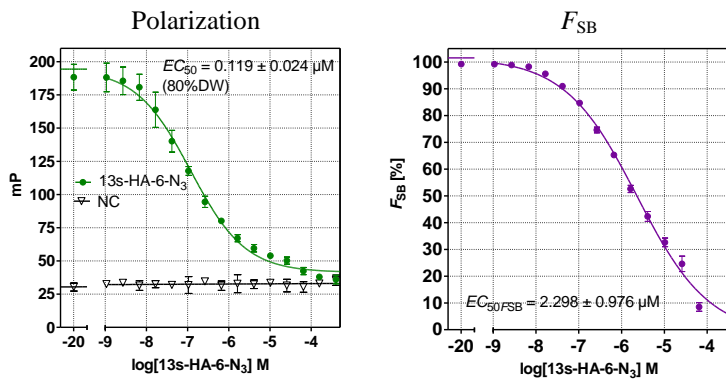

Assay conditions: CXCL12 final assay concentration c = 60 nM, DW = dynamic window, NC = negative control

Competition assay: TGF-β1 + 13s-HA-6-5(6)-TAMRA (19) versus 13s-HA-6-N<sub>3</sub> (26)

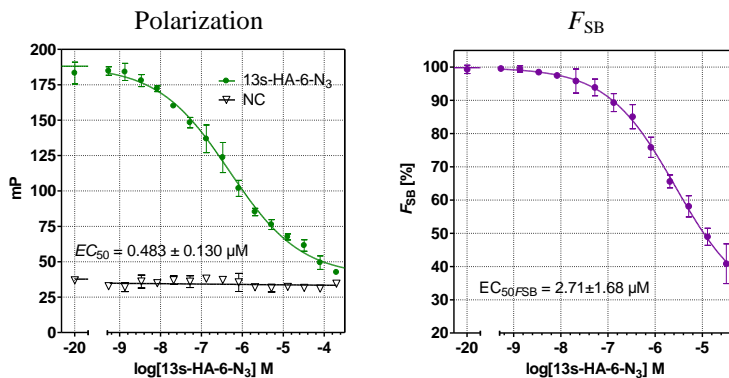

Assay conditions: TGF-β1 final assay concentration c = 89 nM, NC = negative control

Competition assay: fibroblast growth factor 1 + 13s-HA-6-5(6)-TAMRA (19) versus 13s-HA-6-N<sub>3</sub> (26)

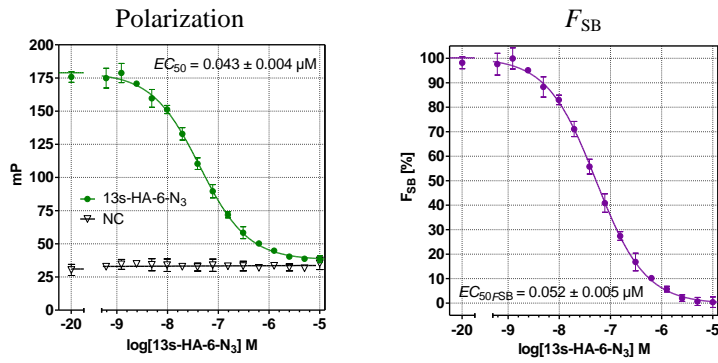

Assay conditions: FGF-1 final assay concentration  $c = 67 \text{ nM}$ , NC = negative control

Competition assay: fibroblast growth factor 2 + 13s-HA-6-5(6)-TAMRA (19) versus 13s-HA-6-N<sub>3</sub> (26)

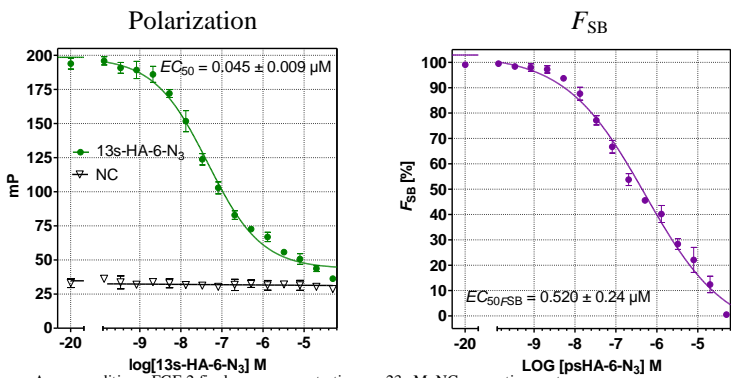

Assay conditions: FGF-2 final assay concentration  $c = 23 \text{ nM}$ , NC = negative control

Competition assay: bone morphogenetic protein 2 + 13s-HA-6-5(6)-TAMRA (19) versus 13s-HA-6-N<sub>3</sub> (26)

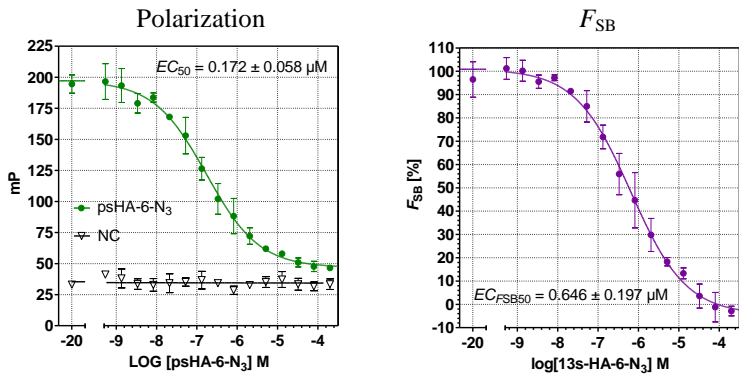

Assay conditions: BMP-2 final assay concentration  $c = 160 \text{ nM}$ , NC = negative control

Competition assay: sclerostin + 13s-HA-6-5(6)-TAMRA (19) versus 13s-HA-6-N<sub>3</sub> (26)

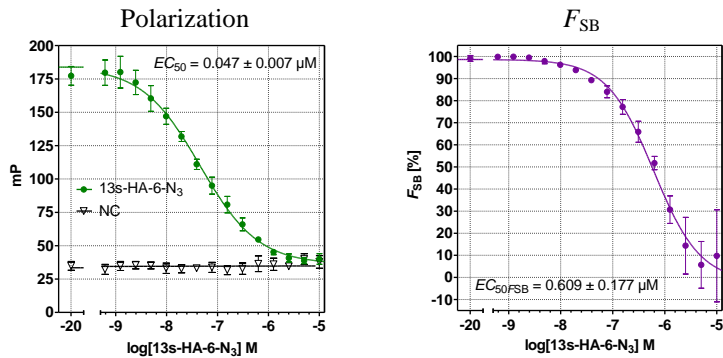

Assay conditions: sclerostin final assay concentration  $c = 31 \text{ nM}$ , NC = negative control

Competition assay: TIMP-3 + 13s-HA-6-5(6)-TAMRA (19) versus 13s-HA-6-N<sub>3</sub> (26)

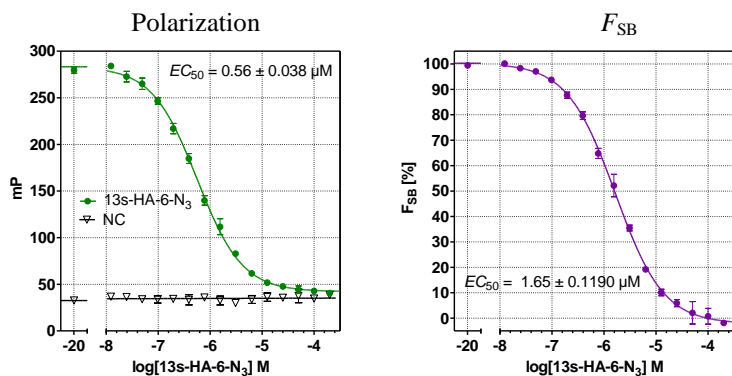

Assay conditions: TIMP-3 final assay concentration  $c = 67$  nM, NC = negative control

Competition assay: antithrombine III + 13s-HA-6-5(6)-TAMRA (19) versus 13s-HA-6-N<sub>3</sub> (26)

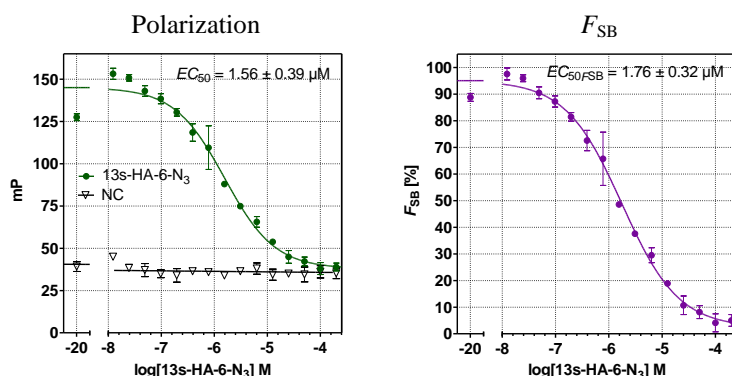

Assay conditions: AT-3 final assay concentration  $c = 540$  nM, NC = negative control

6.14 Competition Assays with Fondaparinux (27)

Competition assay: interleukin 8 + 9s-HA-4-5(6)-TAMRA (15) versus Fondaparinux (27)

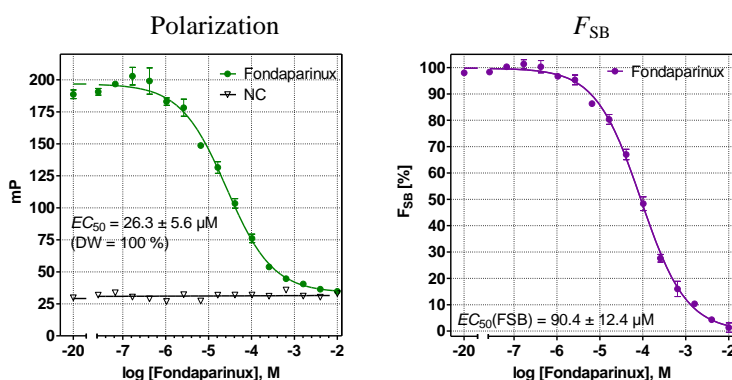

Assay conditions: interleukin-8 final assay concentration  $c = 800$  nM (DW = 100 %), NC = negative control.

Competition assay: interleukin 10 + 9s-HA-4-5(6)-TAMRA (15) versus Fondaparinux (27)

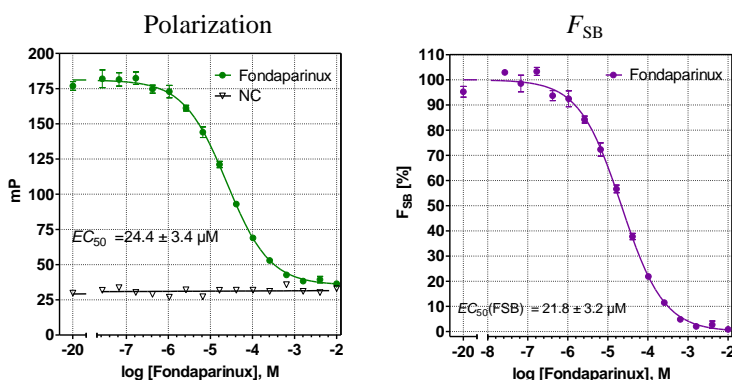

Assay conditions: interleukin-10 final assay concentration  $c = 3.3$  μM, NC = negative control.



Competition assay: bone morphogenetic protein 2 + 9s-HA-4-5(6)-TAMRA (15) versus Fondaparinux (27)

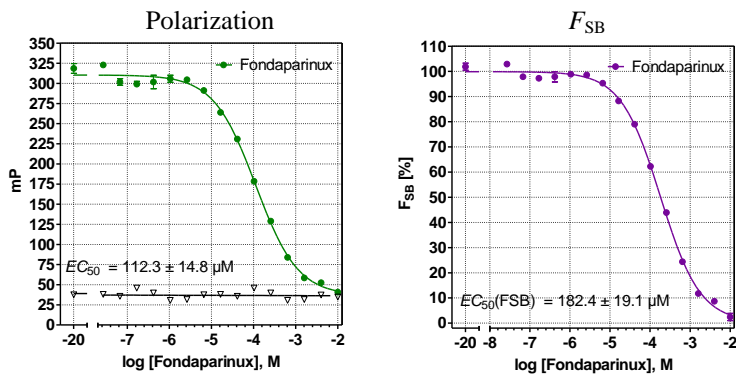

Competition assay: sclerostin + 13s-HA-6-5(6)-TAMRA (19) versus Fondaparinux (27)

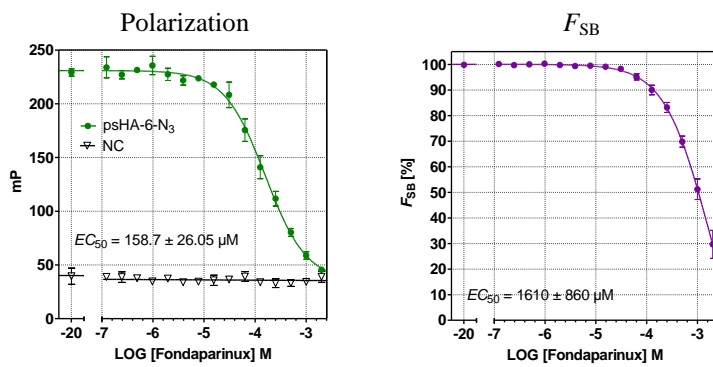

## 7. Isothermal Titration Calorimetry

Titration with 9s-HA-4-N<sub>3</sub> and (9s-HA-4-S-PEG-S-) <sub>2</sub> were carried out using a MicroCal iTC200 calorimeter (Microcal) at 25 °C, titrations with 9s-HA-4-TAMRA were measured on Microcal PEAQ-ITC. IL-8 was dissolved in Phosphate buffer without DTT to reduce noise before measurements. The synthesized oligosaccharides were resolubilized in the same buffer to ensure a reasonable baseline. The titration of IL-8 with 9s-HA-4-TAMRA was carried out with 5 wt-% Glycerol in Phosphate buffer. The ITC titration and FP assay of IL8 vs. 9s-HA-4-N<sub>3</sub> in the presence of 5 wt-% glycerol showed no significant influence on binding. Concentrations for each component in each experiment are listed in the table below. For each titration 19 to 25 injections of 1.5 and 1 μl respectively of titrant were made at 180 s intervals, while stirring at 750 r.p.m. Raw data were integrated, normalized and the titration curve fitted using MicroCal PEAQ-ITC analysis software provided by Microcal.

### ITC measurements with IL-8

**STable 1:** data of the ITC measurement for IL-8 and the sulfated oligohyaluronans **25, 20, 15**

| Compound                             | $C_{\text{protein}}$ [μM] | $C_{\text{ligand}}$ [μM] | $N^a$ | $\Delta H$ [kcal·M <sup>-1</sup> ] | $-T\Delta S$ [kcal·M <sup>-1</sup> ] | $K_D$ [nM]   | $\bar{x}(K_D)^b$ [nM] |
|--------------------------------------|---------------------------|--------------------------|-------|------------------------------------|--------------------------------------|--------------|-----------------------|
| 9s-HA-4-N <sub>3</sub> (25)          | 10                        | 50                       | 0.388 | -45.3                              | 2.58                                 | 33.7 ± 10.4  |                       |
|                                      |                           |                          | 0.314 | -50.0                              | 7.19                                 | 32.0 ± 8.88  | 34 ± 10               |
|                                      |                           |                          | 0.403 | -42.0                              | -0.42                                | 36.8 ± 12.1  |                       |
| (9s-HA-4-S-PEG-S-) <sub>2</sub> (20) | 10                        | 50                       | 0.197 | -106.0                             | 62.2                                 | 18.8 ± 15.4  |                       |
|                                      |                           |                          | 0.199 | -131.0                             | 84.6                                 | 7.37 ± 5.54  | 16 ± 10               |
|                                      |                           |                          | 0.202 | -102.0                             | 57.6                                 | 20.4 ± 8.88  |                       |
| 9s-HA-4-TAMRA (15)                   | 10                        | 100                      | 0.387 | -59.8                              | 13.3                                 | 7.36 ± 4.23  |                       |
|                                      |                           |                          | 0.463 | -52.2                              | 5.80                                 | 7.65 ± 4.00  | 9 ± 4                 |
|                                      |                           |                          | 0.420 | -56.8                              | 11.5                                 | 11.60 ± 4.59 |                       |

<sup>a</sup>molar binding ratio of the ligand protein interaction (observed stoichiometry) <sup>b</sup>mean value of the calculated  $K_D$  values.

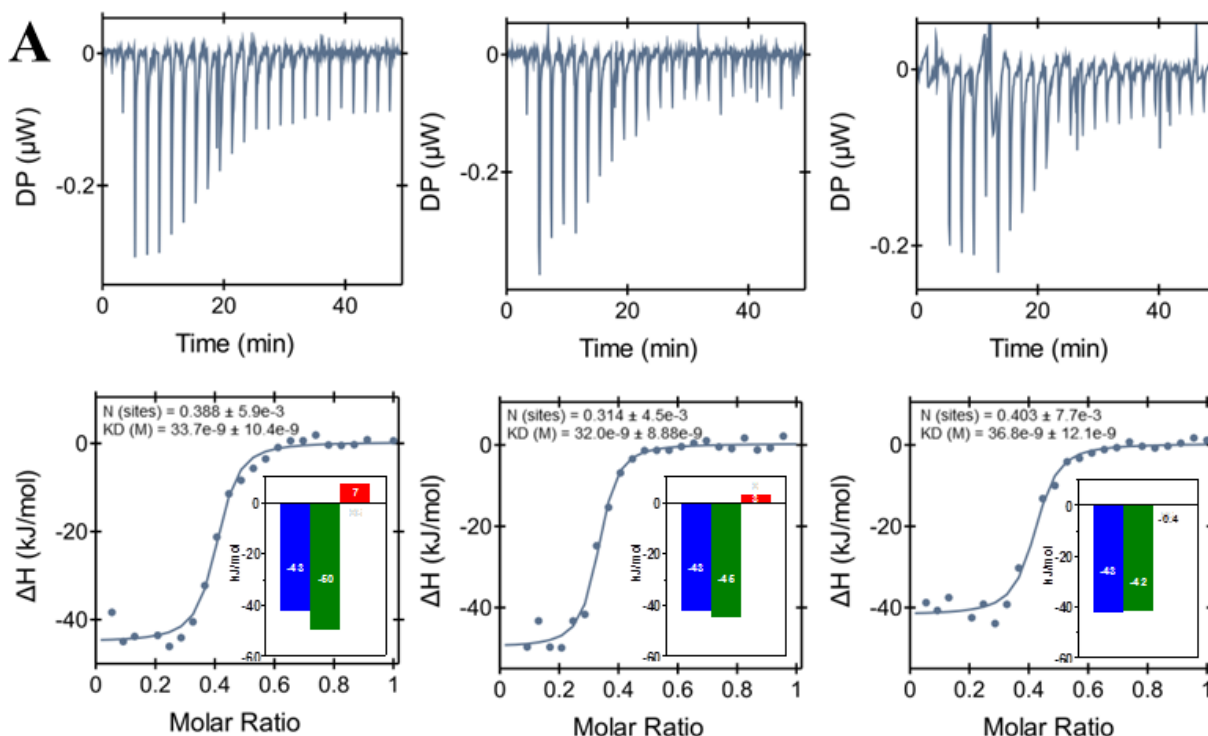

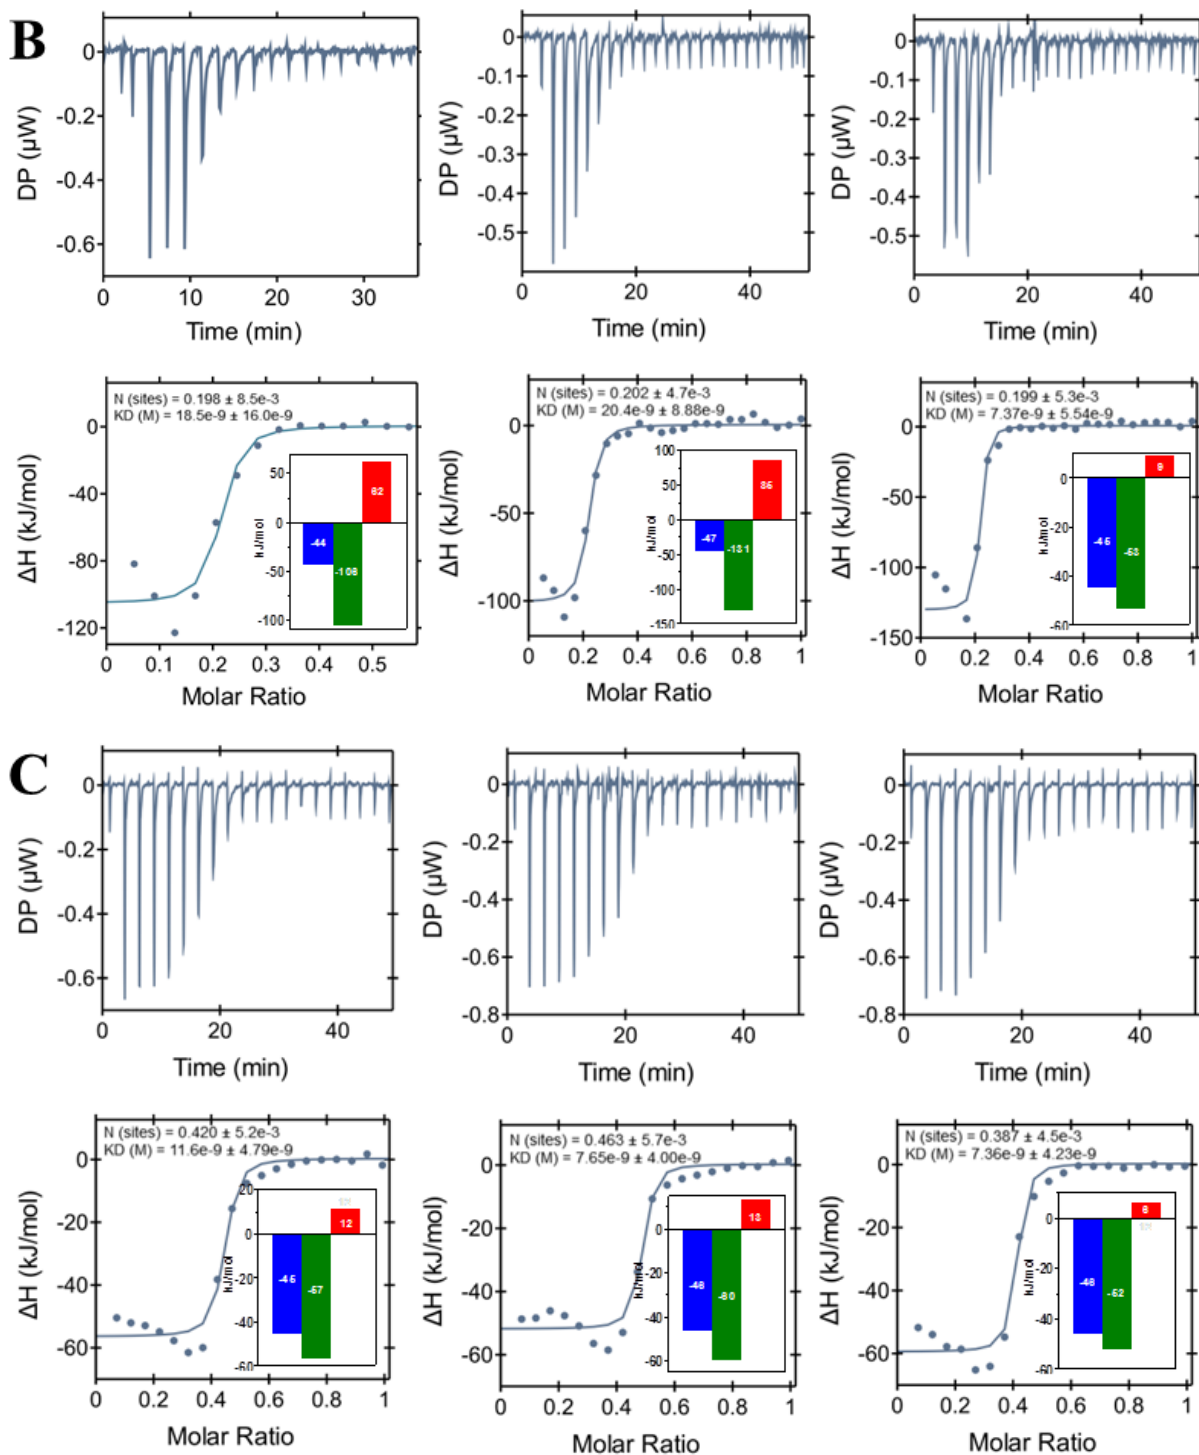

**SScheme 2:** Isothermal titration calorimetry data of a 50  $\mu\text{M}$  solution of A) 9s-HA-4- $\text{N}_3$  (**25**) and B) (9s-HA-4-S-PEG-S-) $_2$  (**20**) and a 100  $\mu\text{M}$  solution of C) 9s-HA-4-TAMRA (**15**) titrated to IL-8 (10  $\mu\text{M}$ ) yielded a dissociation constant  $K_D$  of 34 nM, 14 and 9 nM, respectively, in three independent experiments

■  $\Delta\text{G}$   
■  $\Delta\text{H}$   
■  $-T\Delta\text{S}$

### ITC measurements with IL-10

**STable 2:** data of the ITC measurement for IL-10 and the sulfated oligohyaluronans **25**, **20**, **15**

| Compound                                  | $c_{\text{protein}}$<br>[ $\mu\text{M}$ ] | $c_{\text{ligand}}$<br>[ $\mu\text{M}$ ] | $N^a$ | $\Delta H$ [kcal·M <sup>-1</sup> ] | $-\text{T}\Delta S$<br>[kcal·M <sup>-1</sup> ] | $K_D$ [ $\mu\text{M}$ ] | $\bar{x}(K_D)^b$<br>[ $\mu\text{M}$ ] |
|-------------------------------------------|-------------------------------------------|------------------------------------------|-------|------------------------------------|------------------------------------------------|-------------------------|---------------------------------------|
| <b>9s-HA-4-N<sub>3</sub> (25)</b>         | 10                                        | 40                                       | 0.212 | -40.9                              | 7.77                                           | $1.58 \pm 0.168$        | $1.56 \pm 0.19$                       |
|                                           |                                           |                                          | 0.217 | -39.7                              | 6.56                                           | $1.55 \pm 0.217$        |                                       |
| <b>(9s-HA-4-S-PEG-S)<sub>2</sub> (20)</b> | 10                                        | 100                                      | 0.213 | -57.4                              | 23.5                                           | $1.16 \pm 0.28$         | $1.38 \pm 0.41$                       |
|                                           |                                           |                                          | 0.215 | -61.3                              | 28.1                                           | $1.57 \pm 0.35$         |                                       |
|                                           |                                           |                                          | 0.235 | -48.9                              | 15.5                                           | $1.41 \pm 0.6$          |                                       |
| <b>9s-HA-4-TAMRA (15)</b>                 | 10                                        | 100                                      | 0.340 | -52.1                              | 15.7                                           | $0.415 \pm 0.105$       | $0.656 \pm 0.450$                     |
|                                           |                                           |                                          | 0.263 | -68.9                              | 33.8                                           | $0.699 \pm 0.142$       |                                       |
|                                           |                                           |                                          | 0.338 | -32.7                              | -1.93                                          | $0853 \pm 0.203$        |                                       |

<sup>a</sup>molar binding ratio of the ligand protein interaction (observed stoichiometry)<sup>b</sup>mean value of the calculated  $K_D$  values.

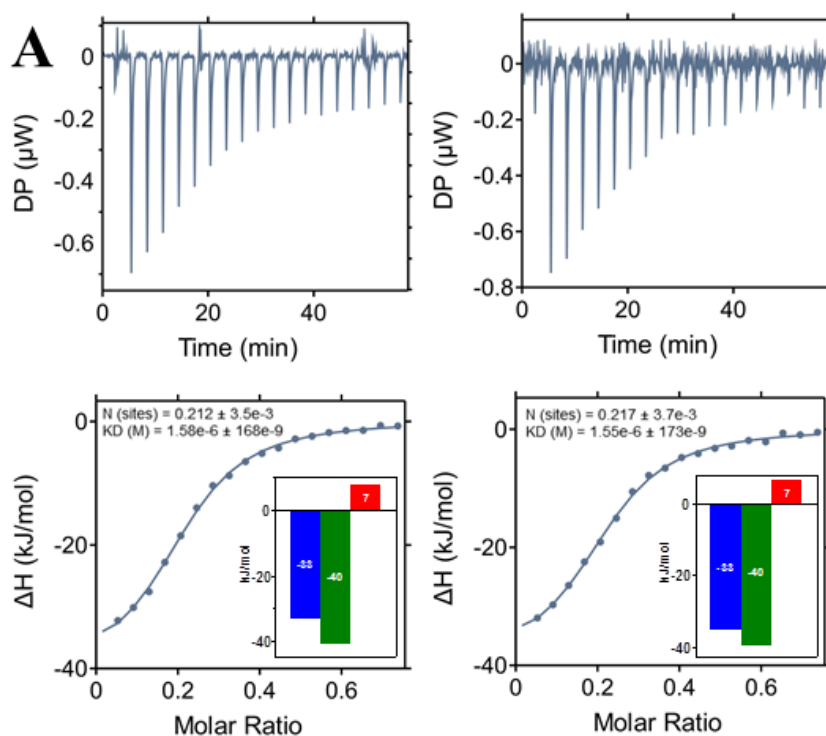

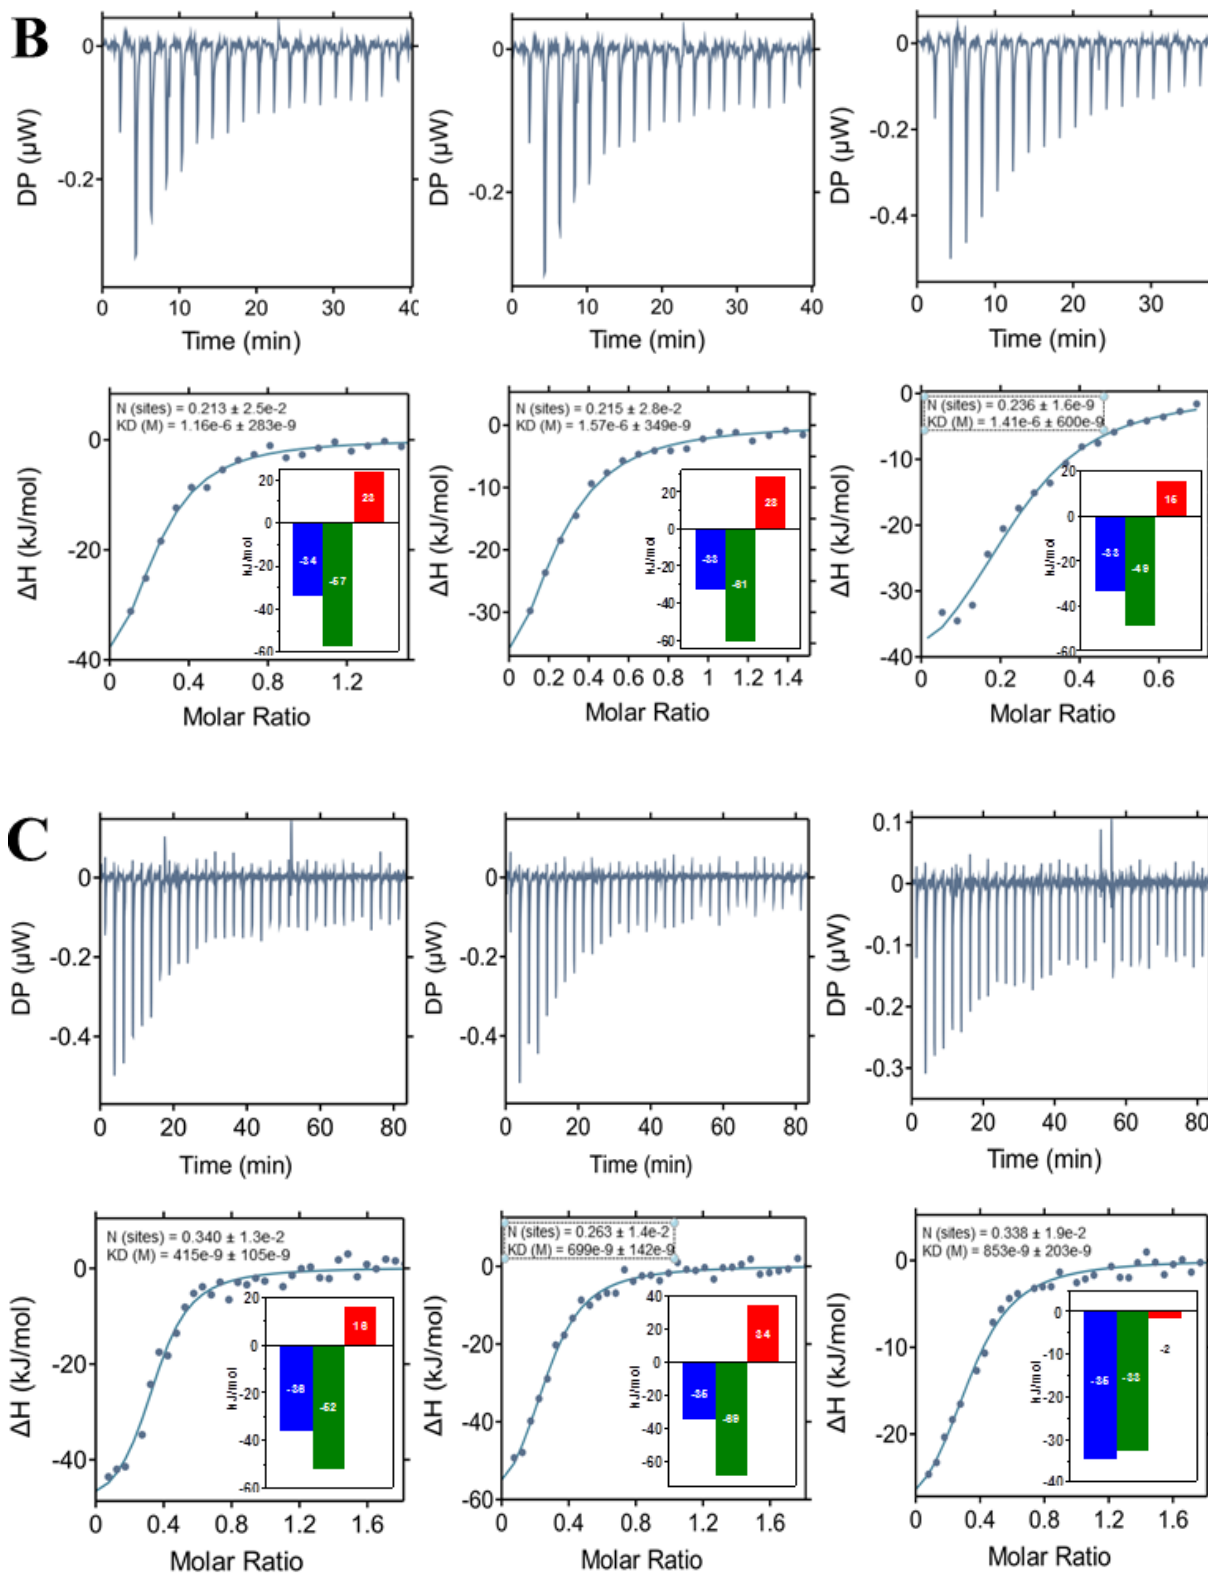

**SScheme 3:** Isothermal titration calorimetry data of a 100  $\mu\text{M}$  solution of A) 9s-HA-4- $\text{N}_3$  (25) and B) (9s-HA-4-S-PEG-S-) $_2$  (20) and a 100  $\mu\text{M}$  solution of C) 9s-HA-4-TAMRA (15) titrated to IL-10 (40, 10-20, and 10  $\mu\text{M}$ ) yielded a dissociation constant  $K_D$  of 1.56, 1.38 and 0.656  $\mu\text{M}$ , respectively, in three independent experiments

## 8. Molecular Modeling

### Molecular Docking

Sulfated hyaluronan derivatives **15-16**, **19**, **21-23**, **25-26** and truncated half moiety of **20** (psHA-4-S-PEG-SMe) were modelled using AMBER 14<sup>10</sup> and MOE.<sup>11</sup> For the bivalent compound **20**, due to the restriction on maximal number of rotatable bonds that can be taken into account in docking studies, only half a molecule (*i.e.* 9s-HA-4-S-PEG-SMe) was used at first. Charges were taken from the GLYCAM 06-j force field<sup>12</sup> for the different GAG units and from the literature for sulfate groups.<sup>13</sup> AM1-BCC charges were applied for the azide group.<sup>14</sup> RESP atomic charges<sup>15</sup> were derived at the HF/6-31G(d) calculation level for the triazole and sulfo ethylene glycol fragments and at the B3LYP/6-311G++(d,p) level for the TAMRA group using Gaussian09.<sup>16</sup> Crystal and NMR structures of IL-8 as monomer (PDB ID 3IL8, 2.0 Å)<sup>17</sup> and dimer (PDB ID 1IL8),<sup>18</sup> IL-10 (PDB 2ILK, 1.6 Å),<sup>19</sup> BMP-2 (PDB ID 2H62, 1.8 Å)<sup>20</sup> with the N-termini conformation as previously modeled<sup>21</sup> and sclerostin (PDB ID 2K8P, models 1, 10 and 16 from NMR ensemble)<sup>22</sup> were used.

Blind docking was used in order to predict potential GAG recognition sites on the full surface of the target protein. Docking studies of functionalized GAG with protein targets was carried out with Autodock 3.<sup>23</sup> Autogrid3 was used to calculate the atomic potential of each protein structure with a spacing grid of 0.375 Å for IL-8 monomer, 0.475 Å for IL-8 dimer, 0.475 Å for IL-10, 0.650 Å for BMP-2 and 0.700 Å for Sclerostin. Functionalized GAGs were treated completely flexible whereas the protein targets were treated rigid. The Lamarckian genetic algorithm with an initial population size of 300 and a termination condition of 10000 generations and  $9995 \times 10^5$  energy evaluations was used. 1000 independent runs were carried out. Spatial clustering of the top 50 docking solutions was performed with the DBSCAN algorithm.<sup>24</sup>

### Complex refinement by Molecular Dynamics (MD) simulations

The complexes obtained from the docking studies were further refined by Molecular Dynamics (MD) simulations in AMBER14.<sup>10</sup> For those complexes involving IL-8 dimer and two half moieties of **20** with their SPEGS close enough in the 3-dimensional space, a disulfide bond was created to reconstruct the bivalent compound **20**. The resulting bivalent molecule was minimized in MOE using the AMBER12-EHT force field and default parameters prior to MD simulations. Charges were taken from the GLYCAM 06-j force field<sup>12</sup> for the different sulfated hyaluronan units and from the literature for sulfate groups<sup>13</sup>. AMM1-BCC charges were used for the azide group.<sup>14</sup> RESP atomic charges<sup>15</sup> were derived at the HF/6-31G(d) calculation level for the triazole and sulfo ethylene glycol fragments, and at the B3LYP/6-311G++(d,p) level for the TAMRA group using Gaussian09.<sup>16</sup> Parameters were taken from the GLYCAM-06j<sup>12</sup> for the GAG part and ff14SB force field<sup>10</sup> for each protein target. Missing parameters of the azide, triazole, TAMRA and sulfo ethylene glycol groups were taken from the General Amber Force Field (GAFF)<sup>25</sup> and literature.<sup>26</sup> Each GAG/protein complex was solvated in a truncated octahedral box of TIP3P water molecules and neutralized with Na<sup>+</sup> or Cl<sup>-</sup> counterions. MD simulations were preceded by two energy-minimization steps: i) only the solvent and ions were relaxed with position restraints for the solute ( $500 \text{ kcal/mol} \cdot \text{Å}^2$ ) using 1000 steps of steepest descendent minimization followed by 500 steps of conjugate gradient minimization; ii) the entire system was minimized without restraints applying 3000 cycles of steepest descendent and 3000 steps of conjugate gradient equilibration. Then the system was heated up from 200 K to 300 K in 20 ps with weak position restraints ( $10 \text{ kcal/mol} \cdot \text{Å}^2$ ). Langevin temperature coupling with a collision frequency  $\gamma = 1 \text{ ps}^{-1}$  was used at this step. The system was equilibrated under constant pressure of 1 atm using periodic boundary conditions (NPT conditions) at 300 K for 500 ps. A

total of 100 ns MD production was carried out at 300 K NPT conditions. In the case of IL-8, due to lack of structure at the C-terminal  $\alpha$ -helix previously observed in unrestrained MD simulations,<sup>1</sup> weak position restraints (10 kcal/mol·Å<sup>2</sup>) were applied to the residues 68-77 during MD equilibration and production times. The SHAKE algorithm was used to constrain all bonds involving hydrogen atoms. A time step of 2 fs per step was used during SHAKE algorithm. A cutoff of 8 Å was applied to treat the nonbonded interactions, and the Particle Mesh Ewald (PME) method was used to treat long-range electrostatic interactions. MD trajectories were recorded every 10 ps. For GAGs, pyranose rings were harmonically restrained. Trajectories were visualized with VMD<sup>27</sup> and evaluated in terms of intermolecular H-bonds by using the CPPTRAJ module implemented in AMBER. The criterion used to consider a dynamic hydrogen bond formation was to be found at least 10% of the total simulation time. Energy decomposition per residue and pairwise as well as binding free energy post-processing analysis of 200 frames distributed along the MD productions were performed in implicit solvent using the MM-GBSA method<sup>28</sup> as implemented in AMBER14. Data analysis was carried out with the R-package.<sup>29</sup> Figures were created with PyMOL.<sup>30</sup>

### Discussion S1

**IL-10:** Molecular docking and MD simulations of the sHA derivatives with IL-10 indicated that residues R104, R106, R107 and K119 play a key role for GAG recognition.<sup>31</sup> The calculated binding energies of the TAMRA-labeled sHA (**15**, **19**) increased compared to the azides (**25**, **26**) (STables 10-11). The TAMRA analogs were able to establish contacts with both monomer units of the cytokine. With respect to the length of GAG and in agreement with the experimental observations, a small increase in binding was observed for the hexahyaluronans (**19**, **26**) in comparison to the tetrahyaluronans (**15**, **25**), which was attributed to more favorable interactions with IL-10 residues R102, R104, R107 and K117 (SFigure 12).

**BMP-2:** In the BMP-2 dimer structure, the N-termini, which are crucial for GAG and receptor recognition,<sup>32</sup> were modeled in  $\alpha$ -helical conformation.<sup>21</sup> The resulting structure was used to explore the binding of derivatives **15**, **19**, **21-23** and **25-26**. These molecules were predicted to bind at the N-termini in two different modes: in parallel and/or perpendicular orientation (STable 12 and SFigure 13A). The low sulfated azide analogs 2s-HA-4-N<sub>3</sub> **21** and 5s-HA-4-N<sub>3</sub> **22** did not show any preference for any of these two binding modes in terms of energy, while for the high sulfated derivatives 7s-HA-4-N<sub>3</sub> **23** and 9s-HA-4-N<sub>3</sub> **25** the parallel orientation was energetically favored. The same holds true for the binding poses computed for the 9s-HA-4-TAMRA **15**, which from all tetra-derivatives was the one establishing the highest number of interactions with the protein (STable 12). Furthermore, pairwise energy decomposition calculations and H-bond analysis indicated that the TAMRA moiety was implicated in additional electrostatic interactions with residue R9 of one BMP-2 monomer (STable 13, SFigure 13B). All these interactions are responsible for the 30-fold increase in binding obtained experimentally for **15** compared to **25**. Elongation of these molecules by one disaccharide unit resulted in a parallel-to-perpendicular molecular reorientation of compounds **26** and **19** (SFigure 13C). The two most energetically favorable binding poses of the 13s-HA-6-TAMRA **19** were oriented both non-reducing to the reducing end, and *vice versa*. These two orientations can be taken as equivalent considering BMP-2 dimer symmetry. The TAMRA moiety appeared either establishing interactions with the BMP-2 N-terminus or exposed to the solvent (STables 12-13). The binding free energies obtained for derivatives **15**, **19**, **21-23** and **25-26** suggested an increase in binding with the degree of sulfation, which is in accordance with our experimental results (Tables 1 and 3 in main text of the manuscript, SFigure 14). The computed values showed increase in

binding of the hexahyaluronan azide vs. its tetra-analog, while binding for both TAMRA derivatives was in the same range, which correlates very well with the differences in binding found experimentally (SFigure 14).

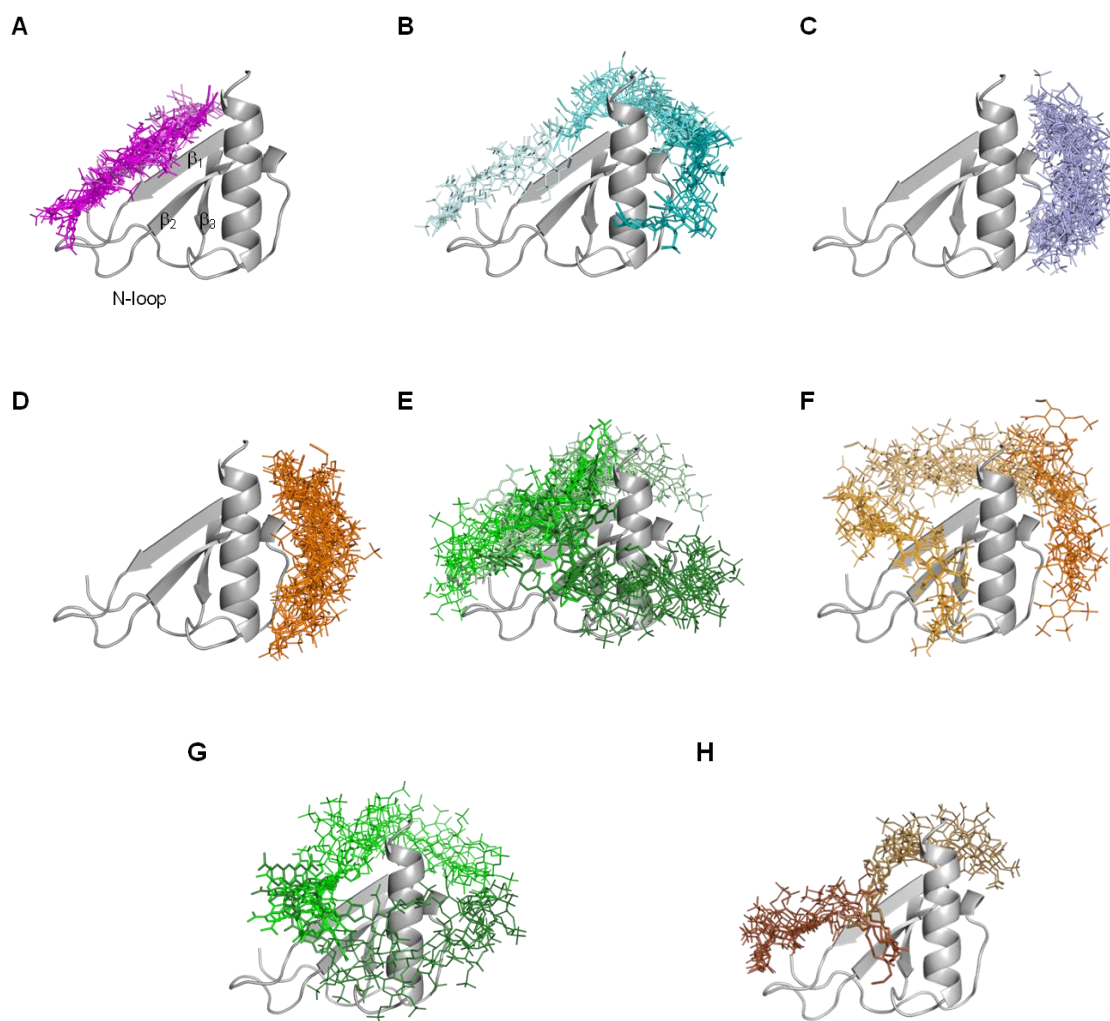

**SFigure 1.** Molecular modelling of IL-8 monomer interaction with sHA derivatives. Docking results using Autodock 3 and DBSCAN clustering for sHA derivatives (A) **21**, (B) **22**, (C) **23**, (D) **25**, (E) **15**, (F) **26**, (G) **19** and (H) **20** (half molecule). IL-8 is shown in gray cartoon. Different clusters of sHA derivatives are shown in sticks with gradient colors: pink for **21**, cyan for **22**, violet for **23**, orange for **25**, green for **15**, orange for **26**, green for **19** and brown for **20** as 9s-HA-4-S-PEG-SMe.



**STable 3.** MM-GBSA binding free energies and interacting residues determined by per-residue energy decomposition and H-bond analysis for sHA **15**, **19-23** and **25-26** in complex with IL-8 monomer.

| sHA derivative                    | IL-8 recognition region / non reducing to reducing end orientation                      | IL-8 interacting residues                        | $\Delta G$ (kcal/mol) <sup>a</sup> |
|-----------------------------------|-----------------------------------------------------------------------------------------|--------------------------------------------------|------------------------------------|
| <b>21</b> (cluster1)              | $\beta_1$ strand / antiparallel                                                         | L10, R11, Q13, R31                               | $-19.9 \pm 2.5$                    |
| <b>21</b> (cluster2)              | $\beta_1$ strand / parallel                                                             | R11, R31, V32, I33, R73                          | $-21.8 \pm 5.0$                    |
| <b>22</b> (cluster1)              | C-terminal $\alpha$ -helix / $\beta_1$ strand and $3_{10}$ -turn N-loop <sup>b</sup>    | H23, K25, K28, R65, K69, K72, R73                | $-24.9 \pm 6.3$                    |
| <b>22</b> (cluster2)              | C-terminal $\alpha$ -helix / parallel                                                   | H23, K25, R65, K69, K72, R73                     | $-31.6 \pm 4.7$                    |
| <b>22</b> (cluster3)              | $\beta_1$ strand / antiparallel                                                         | L10, R11, K16, R31, V32, K47, R52                | $-24.3 \pm 7.5$                    |
| <b>23</b> (cluster1)              | C-terminal $\alpha$ -helix / antiparallel                                               | K25, R65, K69, K72, R73                          | $-41.0 \pm 4.7$                    |
| <b>23</b> (cluster2)              | C-terminal $\alpha$ -helix / parallel                                                   | K25, R65, K69, K72, R73                          | $-36.2 \pm 7.8$                    |
| <b>25</b> (cluster1)              | C-terminal $\alpha$ -helix / antiparallel                                               | H23, K25, R65, K69, K72, R73                     | $-45.6 \pm 3.2$                    |
| <b>25</b> (cluster2)              | C-terminal $\alpha$ -helix / parallel                                                   | H23, K25, R65, K69, K72, R73                     | $-38.4 \pm 5.2$                    |
| <b>15</b> (cluster1)              | C-terminal $\alpha$ -helix / $\beta_1$ strand <sup>b</sup>                              | H23, K25, T42, K59, N61, Q64, R65, K69, K72, R73 | $-51.4 \pm 5.5$                    |
| <b>15</b> (cluster2)              | N-loop, $\beta_1$ strand / antiparallel                                                 | L10, R11, Q13, K28, R31, V32                     | $-40.6 \pm 14.2$                   |
| <b>15</b> (cluster3)              | C-terminal $\alpha$ -helix / $\beta_{1,2}$ strands <sup>b</sup>                         | Q13, K25, K28, R31, I33, K47, S49, R73           | $-38.0 \pm 11.7$                   |
| <b>26</b> (cluster 1)             | $\beta_1$ strand and $3_{10}$ -turn N-loop <sup>b</sup> / $\beta_1$ strand <sup>b</sup> | H23, K25, K28, R31, K69, K72, R73                | $-31.6 \pm 10.1$                   |
| <b>26</b> (cluster 2)             | C-terminal $\alpha$ -helix / antiparallel                                               | K20, H23, K25, R65, K69, K72, R73                | $-45.2 \pm 3.1$                    |
| <b>19</b> (cluster1)              | C-terminal $\alpha$ -helix / $\beta_1$ strand <sup>b</sup>                              | K25, K28, L30, R31, V32, R65, K69, R72, R73      | $-44.6 \pm 6.5$                    |
| <b>19</b> (cluster2)              | C-terminal $\alpha$ -helix / $\beta_1$ strand <sup>b</sup>                              | H23, K25, R31, K59, N61, R65, K69, K72, R73      | $-49.6 \pm 1.9$                    |
| <b>20</b> (cluster1) <sup>c</sup> | N-loop / $\beta_1$ strand <sup>b</sup>                                                  | L10, R11, R31, V32                               | $-33.7 \pm 6.0$                    |
| <b>20</b> (cluster2) <sup>c</sup> | C-terminal $\alpha$ -helix / $\beta_1$ strand <sup>b</sup>                              | K25, K28, K69, F70, K72, R73                     | $-37.8 \pm 4.4$                    |

<sup>a</sup>Values represent the mean  $\pm$  SD from independent 100 ns MD simulations (up to 9 per cluster depending on number of binding poses obtained in the docking studies). <sup>b</sup>Reducing end location. <sup>c</sup> 9s-HA-4-S-PEG-SMe was considered as half moiety for **20**.

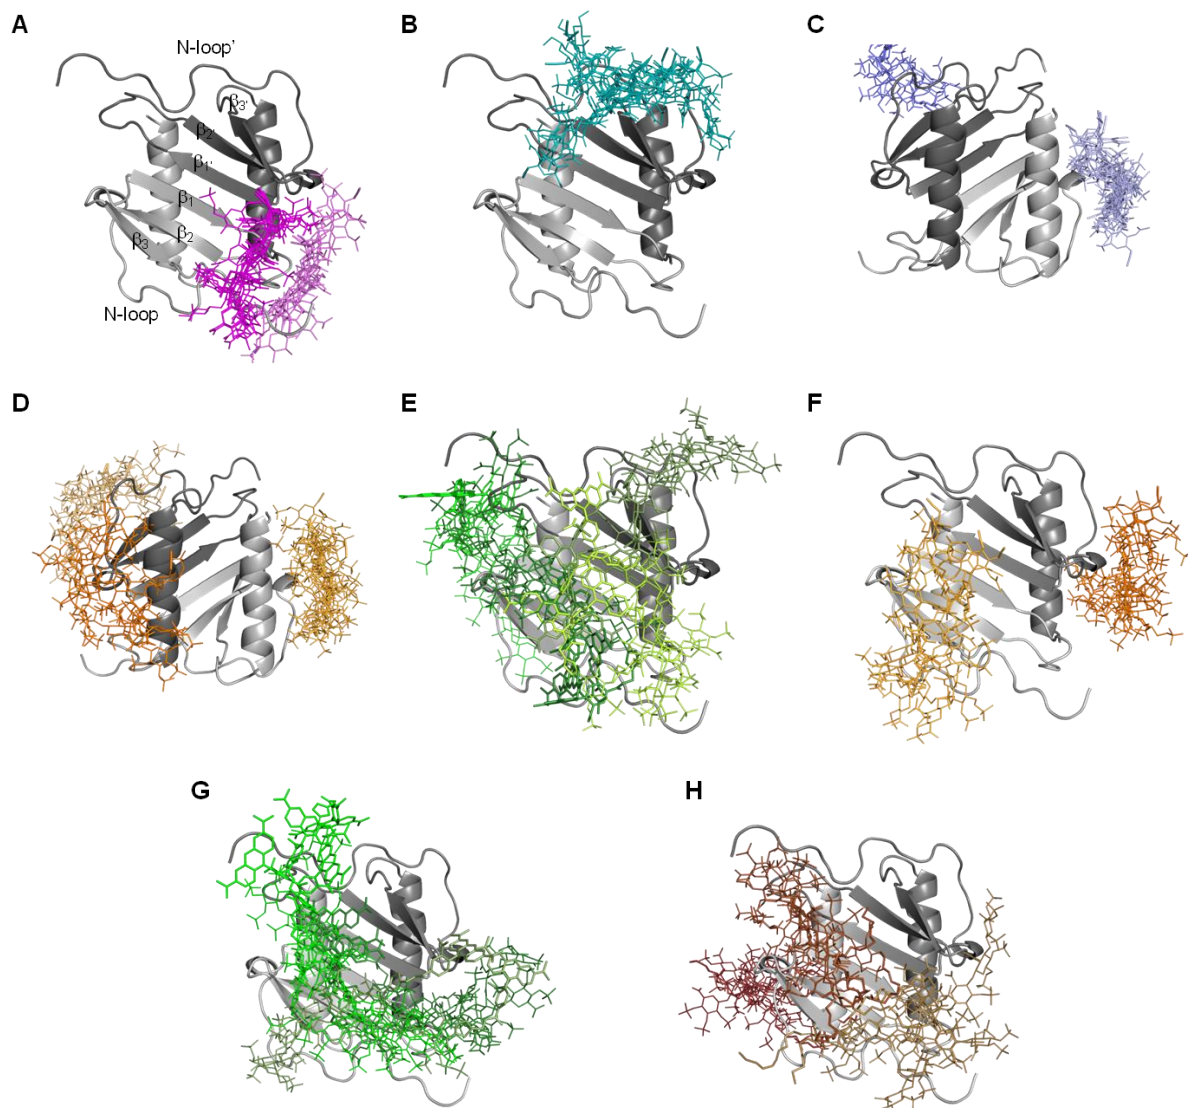

**Figure 2.** Molecular modelling of IL-8 dimer interaction with sHA derivatives. Docking results using Autodock 3 and DBSCAN clustering for sHA derivatives (A) **21**, (B) **22**, (C) **23**, (D) **25**, (E) **15**, (F) **26**, (G) **19** and (H) **20** (half molecule). IL-8 dimer is shown in gray cartoon (light and dark representing each monomer). Different clusters of sHA derivatives are shown in sticks with gradient colors: pink for **21**, cyan for **22**, violet for **23**, orange for **25** and **26**, green for **15** and **19** and, brown for **20**.

**STable 4.** MM-GBSA binding free energies and interacting residues determined by per-residue energy decomposition and H-bond analysis for sHA **15**, **19-23** and **25-26** in complex with IL-8 dimer.

| sHA derivative       | IL-8 recognition site <sup>a</sup>                                        | IL-8 interacting residues <sup>a</sup>                                         | $\Delta G_{\text{IL-8dimer/sHA}}$<br>(kcal/mol) <sup>b</sup> | $\Delta G_{\text{IL8monomer-sHA/IL8monomer}'}$<br>(kcal/mol) <sup>b,c</sup> |
|----------------------|---------------------------------------------------------------------------|--------------------------------------------------------------------------------|--------------------------------------------------------------|-----------------------------------------------------------------------------|
| <b>21</b> (cluster1) | $\beta_1$ strand <sup>d</sup> , N-loop'                                   | K28, A7', K8', E9', R11',<br>Q13', K16', R31'                                  | -33.4 ± 4.7                                                  | n.d.                                                                        |
| <b>21</b> (cluster2) | $\beta_1$ -strand, N-loop'                                                | K28, S49, K8', R11'                                                            | -26.4 ± 1.8                                                  | n.d.                                                                        |
| <b>22</b> (cluster)  | N-loop <sup>d</sup> , $\beta_{1,3}$ -strands                              | A7', K8', R11', Q13', K16',<br>Y18', S19', K20', R52', A7,<br>K8, R11, R31     | -34.1 ± 6.4                                                  | n.d.                                                                        |
| <b>23</b> (cluster1) | C-terminal $\alpha$ -helix,<br>3 <sub>10</sub> -turn N-loop               | H23, K25, R65, K69, K72,<br>R73                                                | -27.9 ± 4.0                                                  | n.d.                                                                        |
| <b>23</b> (cluster2) | N-loop', $\beta_3$ -strand                                                | A7', K8', R11', Q13', K16',<br>K20', R52', E53', L54'                          | -50.4 ± 5.7                                                  | n.d.                                                                        |
| <b>25</b> (cluster1) | C-terminal $\alpha$ -helix,<br>3 <sub>10</sub> -turn N-loop               | K20, H23, K25, R65, K69,<br>K72, R73                                           | -38.0 ± 6.6                                                  | -65.9 ± 8.9                                                                 |
| <b>25</b> (cluster2) | C-terminal $\alpha$ -helix',<br>3 <sub>10</sub> -turn N-loop'             | H23', K25', K28', R65',<br>K69', K72', R73', N76'                              | -42.9 ± 5.6                                                  | -107.2 ± 5.3                                                                |
| <b>25</b> (cluster3) | N-loop', $\beta_3$ -strand                                                | A7', K8', R11', K16', Y18',<br>K20', R52'                                      | -38.4 ± 4.2                                                  | -101.6 ± 25.1                                                               |
| <b>15</b> (cluster1) | N-loop <sup>d</sup> , $\beta_{1,3}$ -strands <sup>d</sup>                 | A7, K8, R11, Q13, R31,<br>K47, A7', K8', R11', Q13',<br>I15', R31', K47', R52' | -72.5 ± 4.8                                                  | -100.8 ± 16.8                                                               |
| <b>15</b> (cluster2) | $\beta_{1,3}$ -strands, N-loop',<br>$\beta_1$ -strand                     | R31, K47, R52, A7', K8',<br>R11', Q13', I15', K16',<br>R31'                    | -58.1 ± 6.8                                                  | -79.3 ± 5.5                                                                 |
| <b>15</b> (cluster3) | N-loop <sup>d</sup> , $\beta_3$ -strand                                   | R11', I15', K16', Y18',<br>S19', K20', R52', A7, K8                            | -51.2 ± 13.1                                                 | -108.1 ± 11.2                                                               |
| <b>15</b> (cluster4) | C-terminal $\alpha$ -helix,<br>3 <sub>10</sub> -turn/N-loop               | K20, H23, K25, K28, R65,<br>K69, K72, R73                                      | -44.5 ± 9.1                                                  | -68.7 ± 9.1                                                                 |
| <b>26</b> (cluster1) | N-loop <sup>d</sup> , $\beta_{1,3}$ -strands,<br>$\beta_1$ -strand        | A7, K8, E9, R11, K16, Y18,<br>K20, R31, K47, R52, A7',<br>K8', E9', R31'       | -59.8 ± 5.5                                                  | -100.5 ± 11.7                                                               |
| <b>26</b> (cluster2) | N-loop, C-terminal<br>$\alpha$ -helix', 3 <sub>10</sub> -turn/N-<br>loop' | A7, K8, H23', K25', K28',<br>S49', R65', K69', K72',<br>R73', N76'             | -61.5 ± 7.0                                                  | -63.2 ± 1.6                                                                 |
| <b>19</b> (cluster1) | N-loop <sup>d</sup> , $\beta_{1,3}$ -strands,<br>$\beta_1$ -strand        | A7, K8, R11, Q13, R31,<br>K47, R52, A7', K8', E9',<br>R11', Q13', R31', K47'   | -69.5 ± 8.2                                                  | -94.3 ± 8.1                                                                 |
| <b>19</b> (cluster2) | N-loop <sup>d</sup> , $\beta_{1,2}$ -strands <sup>d</sup>                 | A7, K8, E9, R11, R31, K47,                                                     | -70.2 ± 7.9                                                  | -96.9 ± 11.4                                                                |

|                                   |                                                           | K8', K25', K28', R31', K47'                                                          |                  |                   |
|-----------------------------------|-----------------------------------------------------------|--------------------------------------------------------------------------------------|------------------|-------------------|
| <b>19</b> (cluster3)              | N-loop <sup>d</sup> , $\beta_{1-3}$ -strands <sup>d</sup> | A7, K8, R11, K16, K20, R31, K47, R52, A7', K8', R31', K47', R52'                     | -85.1 $\pm$ 20.0 | -118.7 $\pm$ 16.0 |
| <b>20</b> (cluster1) <sup>e</sup> | C-terminal $\alpha$ -helix                                | H23, K25, R65, K69, K72, R73                                                         | -42.6 $\pm$ 6.7  | -102.4 $\pm$ 6.7  |
| <b>20</b> (cluster2) <sup>e</sup> | N-loop <sup>d</sup> , $\beta_{1-2}$ -strands <sup>d</sup> | A7, K8, R11, R31, K47, A7', K8', R11', R31', K47'                                    | -68.3 $\pm$ 8.2  | -94.7 $\pm$ 9.1   |
| <b>20</b> (cluster3) <sup>e</sup> | N-loop <sup>d</sup> , $\beta_{1-2}$ -strands <sup>d</sup> | A7', K8', R11', K47', R52'                                                           | -48.3 $\pm$ 8.5  | -96.6 $\pm$ 15.4  |
| <b>20</b> <sup>f</sup>            | N-loop <sup>d</sup> , $\beta_{1-3}$ -strands <sup>d</sup> | A7, K8, E9, R11, Q13, I15, K16, K28, R31, K47, R52, A7', K8', R11', K28', R31', K47' | -87.1 $\pm$ 7.1  | -119.1 $\pm$ 10.6 |

<sup>a</sup>Monomer units are distinguished by a comma. <sup>b</sup>Values represent the mean  $\pm$  SD from independent 100 ns MD simulations (up to 10 per cluster depending on number of binding poses obtained in the docking studies).

<sup>c</sup>Computed  $\Delta G_{IL8_{monomer}/IL8_{monomer}'} = -68.4 \pm 10.8$  kcal/mol from 100 ns MD simulation on IL-8<sub>dimer</sub> NMR structure.

<sup>d</sup>Both IL-8 monomers. <sup>e</sup>9s-HA-4-S-PEG-SMe was considered as half moiety of **20**. <sup>f</sup>Reconstruction of bivalent compound **20**.

**STable 5.** TAMRA/IL-8 and SPEGS/IL-8 pairwise interacting residues determined by MM-GBSA for the best ranked clusters.

| sHA derivatives      | IL-8 <sub>monomer</sub> | sHA derivatives      | IL-8 <sub>dimer</sub>      |
|----------------------|-------------------------|----------------------|----------------------------|
| <b>15</b> (cluster1) | T42, Q64, R65           | <b>15</b> (cluster1) | R11, K8', R11', Q13', I15' |
| <b>19</b> (cluster2) | R31, K59                | <b>19</b> (cluster3) | R52'                       |
| <b>20</b> (cluster2) | V32                     | <b>20</b> (cluster2) | K47'                       |
|                      |                         | <b>20</b>            | R11, Q13                   |

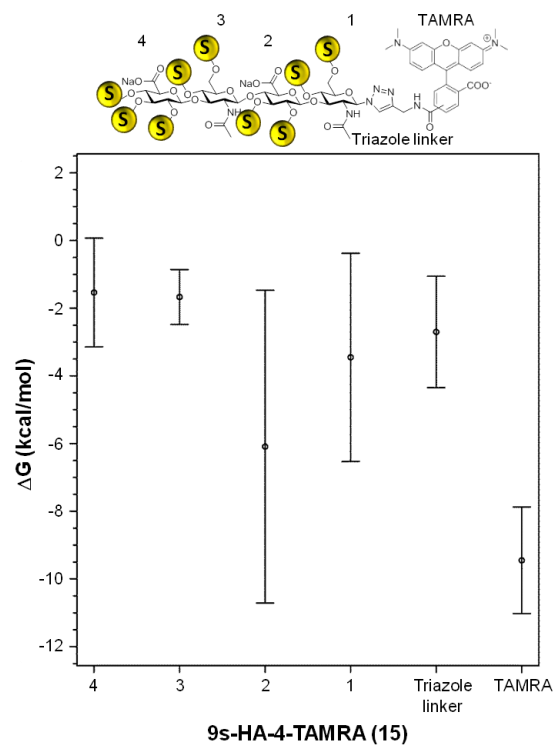

**Figure 3.** Per-residue binding energy contribution calculated with MM-GBSA from independent 100 ns MD simulations of TAMRA derivative **15** in complex with IL-8 dimer (cluster 1). The errors bars represent the standard error of the mean.

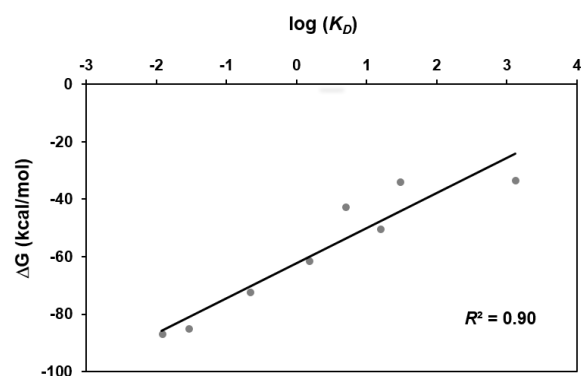

**Figure 4.** Correlation between predicted binding energies ( $\Delta G$ ) calculated with MM-GBSA and experimental  $K_D$  binding data obtained from FP assays for IL-8. Plot of  $\log(K_D)$  vs.  $\Delta G$  using the most favorable calculated binding free energies (STable 4) from independent 100 ns MD simulations of IL-8 dimer in complex with defined sulfated hyaluronans **15**, **19**, **20-23** and **25-26**. The obtained coefficient of determination  $R^2$  is shown in each plot.

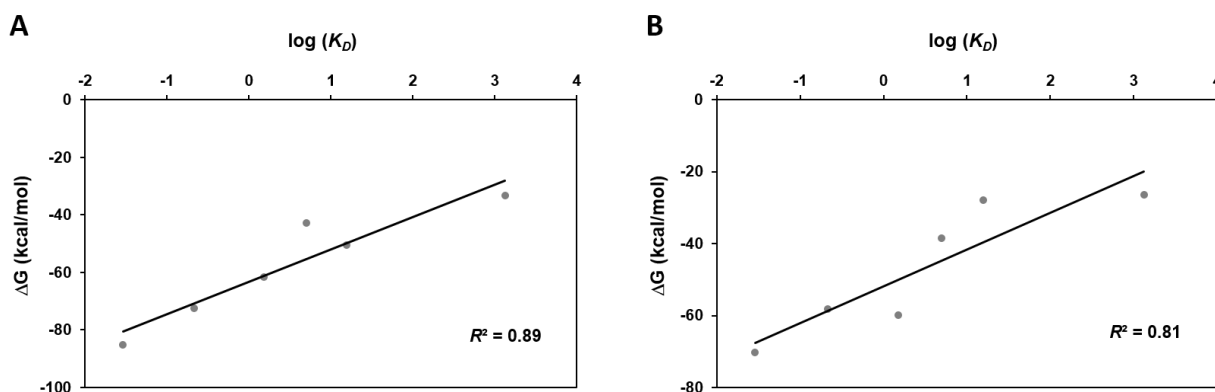

**Figure 5.** Correlation between predicted binding energies ( $\Delta G$ ) calculated with MM-GBSA and experimental  $K_D$  binding data obtained from FP assays for IL-8. Plots of  $\log(K_D)$  vs.  $\Delta G$  calculated binding free energies from independent 100 ns MD simulations of IL-8 dimer in complex with defined sulfated hyaluronans **15**, **19**, **21**, **23** and **25-26** involved in (A) the first and (B) the second most favorable predicted binding sites according to STable 4. The obtained coefficient of determination  $R^2$  is shown in each plot.

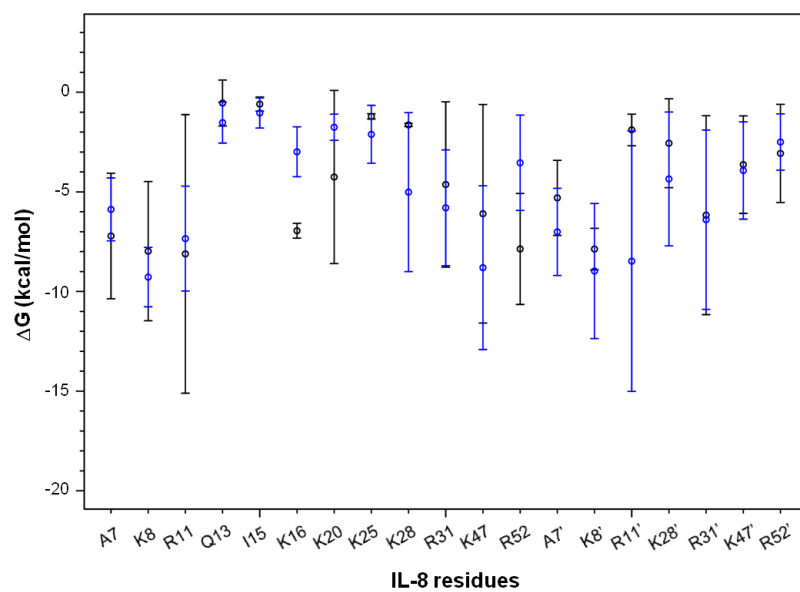

**Figure 6.** Per-residue binding energy contribution calculated with MM-GBSA from independent 100 ns MD simulations of IL-8 dimer in complex with TAMRA derivative **19** (black) and the bivalent compound **20** (blue). The errors bars represent the standard error of the mean.

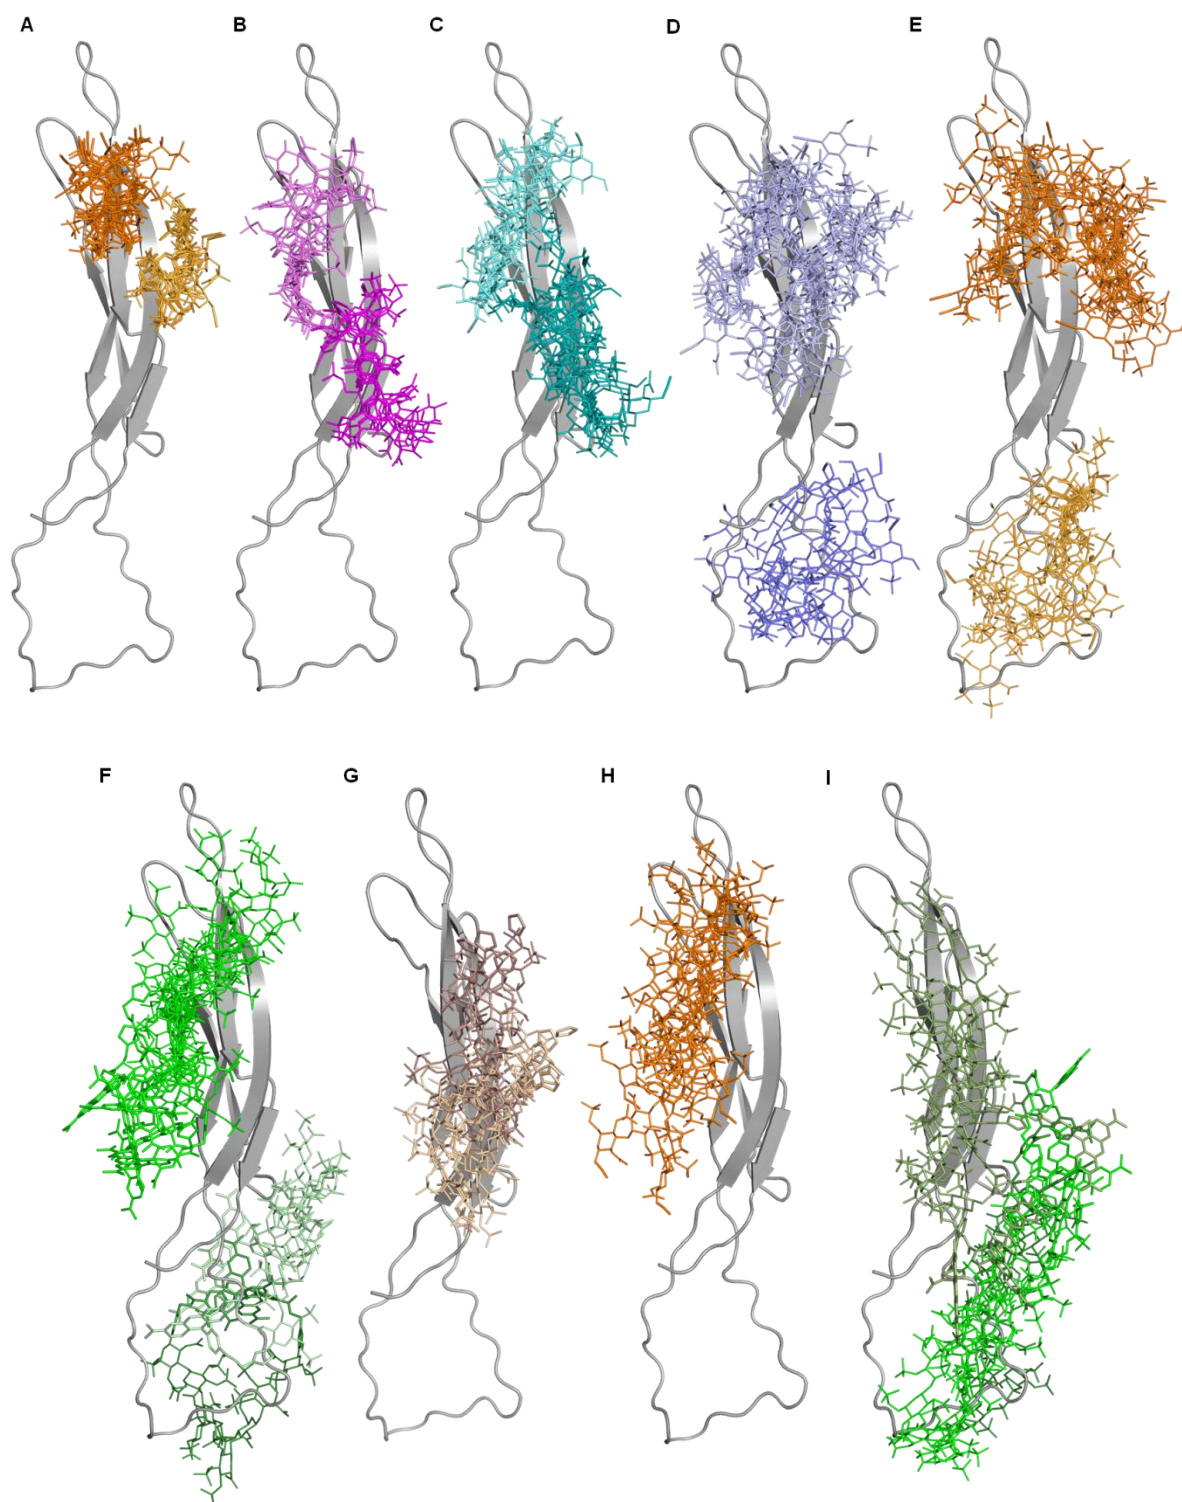

**Figure 7.** Molecular modelling of sclerostin interaction with sHA derivatives. Docking results using Autodock 3 and DBSCAN clustering for sHA derivatives (A) **24**, (B) **21**, (C) **22**, (D) **23**, (E) **25**, (F) **15**, (G) **16**, (H) **26** and (I) **19**. Lowest energy structure from the NMR ensemble of sclerostin (model 1) is shown in gray cartoon. Different clusters of sHA derivatives are shown in sticks with gradient colors: pink for **21**, cyan for **22**, violet for **23**, orange for **24**, **25** and **26**, green for **15** and **19** and, brown for **16**.



**STable 6.** MM-GBSA binding free energies and interacting residues determined by per-residue energy decomposition and H-bond analysis for sHA **15-16** and **19, 21-26** in complex with Sclerostin (model1).

| sHA derivative       | Sclerostin recognition site                                                                       | $\Delta G$ (kcal/mol) <sup>a</sup> |
|----------------------|---------------------------------------------------------------------------------------------------|------------------------------------|
| <b>24</b> (cluster1) | R119, R131, R133, K134, R136                                                                      | -50.6 ± 5.4                        |
| <b>24</b> (cluster2) | R114, A117, R119, R133, K134, R136                                                                | -48.8 ± 2.8                        |
| <b>21</b> (cluster1) | R114, Y115, R136, K144                                                                            | -33.5 ± 5.9                        |
| <b>21</b> (cluster2) | R63, R119, R133, K134, R136                                                                       | -45.3 ± 4.2                        |
| <b>22</b> (cluster1) | R63, R114, R119, R133, K134, R136                                                                 | -49.7 ± 5.7                        |
| <b>22</b> (cluster2) | R114, K134, R136, K142, R145, R148                                                                | -55.7 ± 10.5                       |
| <b>23</b> (cluster1) | R114, R116, R119, R133, K134, R136                                                                | -58.4 ± 8.4                        |
| <b>23</b> (cluster2) | R89, R97, R102, K144, R145, R148                                                                  | -78.1 ± 7.5                        |
| <b>25</b> (cluster1) | R114, R116, R119, K134, R136                                                                      | -70.0 ± 5.0                        |
| <b>25</b> (cluster2) | R89, R97, K99, W100, R102, K142, K144, R145, R148                                                 | -102.3 ± 10.0                      |
| <b>15</b> (cluster1) | R109, R114, R119, R131, R133, K134, R136, R148                                                    | -80.7 ± 6.1                        |
| <b>15</b> (cluster2) | Y54, G86, P87, A88, L90, L91, I95, R97, K99, W100, R102, R109, R114, R136, K142, K144, R145, R148 | -102.5 ± 3.7                       |
| <b>15</b> (cluster3) | Y54, P87, A88, R89, R97, K99, R102                                                                | -85.0 ± 6.1                        |
| <b>16</b> (cluster1) | R114, R116, R119, K134, R136, K142, K144                                                          | -70.7 ± 9.0                        |
| <b>16</b> (cluster2) | R114, R116, A117, R119, R133, K134, R136                                                          | -74.1 ± 6.6                        |
| <b>26</b> (cluster)  | R114, R119, R131, R133, K134, R136, K142, K144                                                    | -104.6 ± 13.2                      |
| <b>19</b> (cluster1) | R57, R89, L91, R97, K99, W101, R102, R114, R116, K142, K144, R145, R148                           | -127.0 ± 9.2                       |
| <b>19</b> (cluster2) | S52, R57, C85, G86, P87, A88, R89, L90, R97, K99, R102, R114, K142, K144, R145, R148              | -95.0 ± 7.3                        |
| <b>19</b> (cluster3) | R89, R102, R109, R114, Y115, R116, R119, R133, K134, R136, K142, K144, R145, T147, R148           | -124.3 ± 12.9                      |

<sup>a</sup>Values represent the mean ± SD from independent 100 ns MD simulations (up to 10 per cluster depending on number of binding poses obtained in the docking studies).

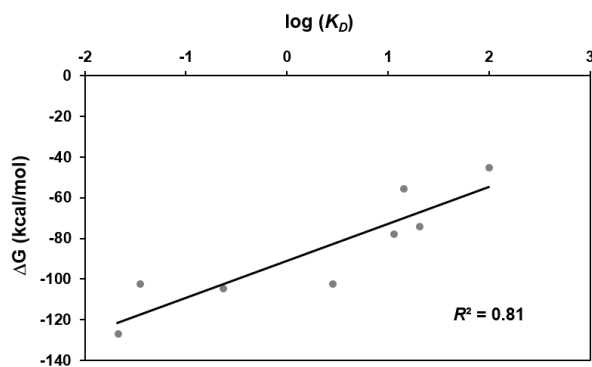

**Figure 8.** Correlation between predicted binding energies ( $\Delta G$ ) calculated with MM-GBSA and experimental  $K_D$  binding data obtained from FP assays for sclerostin. Plot of  $\log(K_D)$  vs.  $\Delta G$  using the most favorable calculated binding free energies (STable 6) from independent 100 ns MD simulations of sclerostin (model 1) in complex with defined sulfated hyaluronans **15**, **16**, **19**, **21-23** and **25-26**. The obtained coefficient of determination  $R^2$  is shown in each plot.

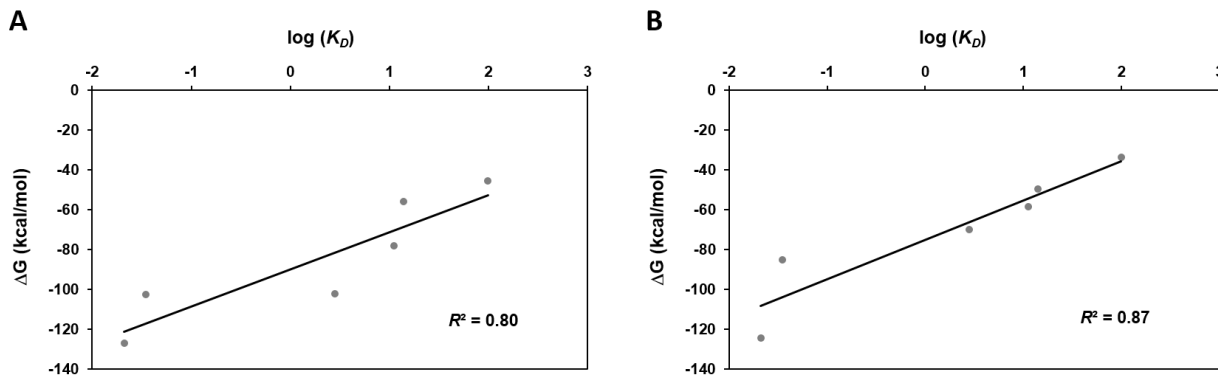

**Figure 9.** Correlation between predicted binding energies ( $\Delta G$ ) calculated with MM-GBSA and experimental  $K_D$  binding data obtained from FP assays for sclerostin. Plots of  $\log(K_D)$  vs.  $\Delta G$  calculated binding free energies from independent 100 ns MD simulations of sclerostin (model 1) in complex with defined sulfated hyaluronans **15**, **19**, **21-23** and **25** involved in (A) the first and (B) the second most favorable predicted binding sites according to STable 6. The obtained coefficient of determination  $R^2$  is shown in each plot.

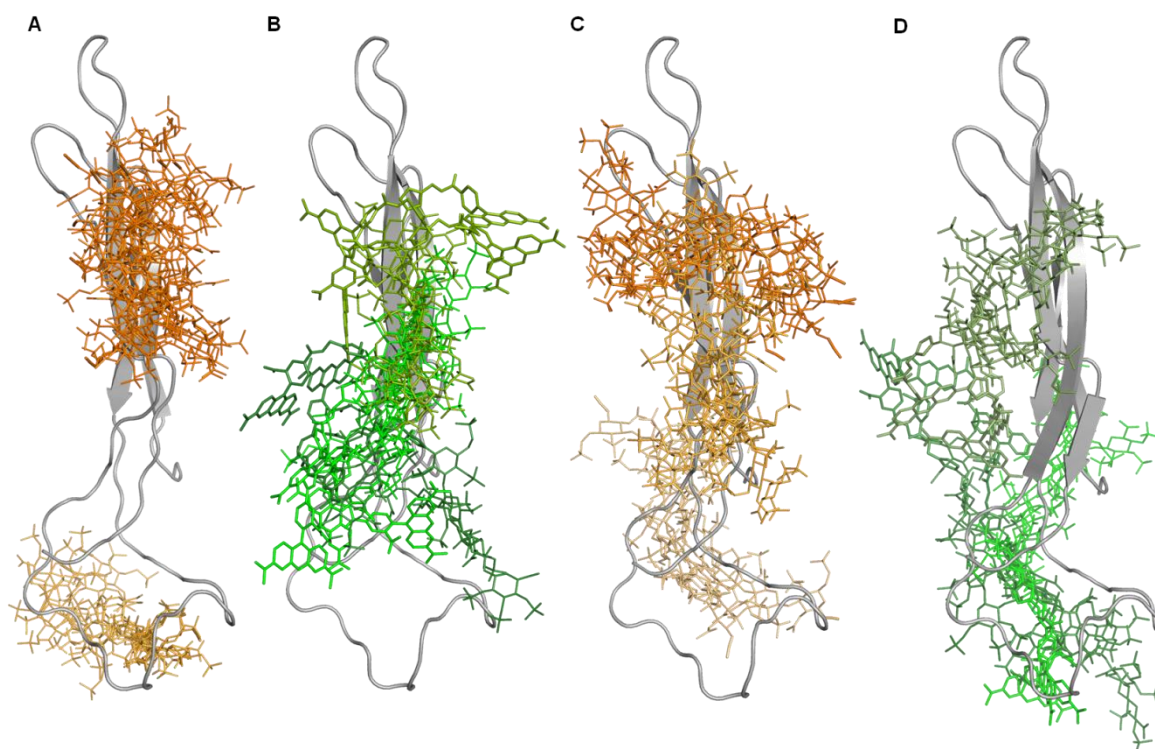

**Figure 10.** Molecular modelling of sclerostin interaction with sHA derivatives. Docking results using Autodock 3 and DBSCAN clustering for sHA derivatives (A) **25**, (B) **15**, (C) **26** and (D) **19**. Sclerostin structure from the NMR ensemble (model 10) is shown in gray cartoon. Different clusters of sHA derivatives are shown in sticks with gradient colors: orange for **25** and **26** and, green for **15** and **19**.

**STable 7.** MM-GBSA binding free energies and interacting residues determined by per-residue energy decomposition and H-bond analysis for sHA **15**, **19**, **25** and **26** in complex with Sclerostin (model10).

| sHA derivative       | Sclerostin recognition site                                                          | $\Delta G$ (kcal/mol) <sup>a</sup> |
|----------------------|--------------------------------------------------------------------------------------|------------------------------------|
| <b>25</b> (cluster1) | R114, R116, A117, R119, R133, K134, R136                                             | -77.6 ± 3.4                        |
| <b>25</b> (cluster2) | S52, R89, R97, K99, R102, R109, R145,                                                | -99.7 ± 5.3                        |
| <b>15</b> (cluster1) | R114, R116, R119, R133, K134, R136, K142, K144, R145, R148                           | -88.7 ± 7.9                        |
| <b>15</b> (cluster2) | R63, R89, R97, F108, I111, P112, R114, R133, R136, K142, K144, R145, L146, R148      | -103.3 ± 14.8                      |
| <b>15</b> (cluster3) | R97, K99, R114, Y115, R116, R119, R131, R133, R136, K142, K144, R145, R148           | -91.7 ± 16.6                       |
| <b>26</b> (cluster1) | R63, R97, K99, R114, R116, R119, R131, R133, K134, R136                              | -92.4 ± 12.1                       |
| <b>26</b> (cluster2) | R89, R97, K99, R114, Y115, R116, R119, R133, R136, K142, K144, R148                  | -126.2 ± 11.5                      |
| <b>26</b> (cluster3) | S52, R57, Q84, P87, R89, R97, K99, R102, R109, K142, K144, R145                      | -96.2 ± 9.1                        |
| <b>19</b> (cluster1) | S52, R57, Q84, P87, R89, L90, L91, R97, K99, R102, R109, R145, R148                  | -129.5 ± 18.9                      |
| <b>19</b> (cluster2) | S52, R57, Q84, R89, R97, K99, R102, R109, K144, R145, R148                           | -119.8 ± 5.7                       |
| <b>19</b> (cluster3) | R63, Q84, R97, K99, W100, R114, R116, R119, R131, R133, K134, R136, K142, K144, R148 | -108.9 ± 4.0                       |

<sup>a</sup>Values represent the mean ± SD from independent 100 ns MD simulations (up to 6 per cluster depending on number of binding poses obtained in the docking studies).

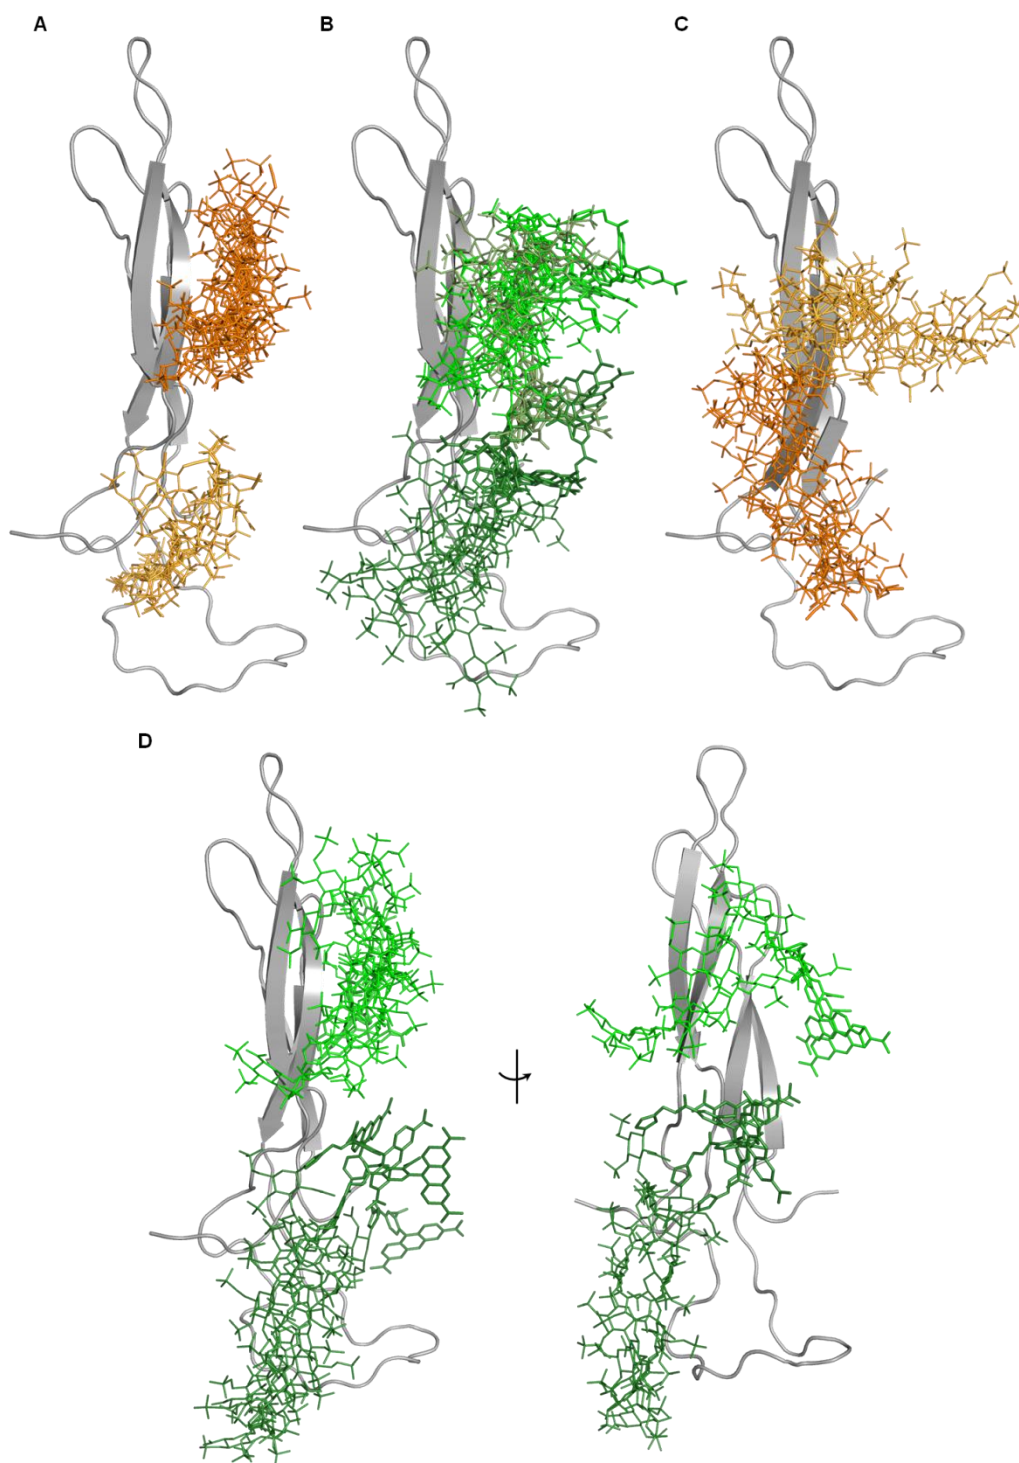

**Figure 11.** Molecular modelling of sclerostin interaction with sHA derivatives. Docking results using Autodock 3 and DBSCAN clustering for sHA derivatives (A) **25**, (B) **15**, (C) **26** and (D) **19**. Sclerostin structure from the NMR ensemble (model 16) is shown in gray cartoon. Different clusters of sHA derivatives are shown in sticks with gradient colors: orange for **25** and **26** and, green for **15** and **19**.

**STable 8.** MM-GBSA binding free energies and interacting residues determined by per-residue energy decomposition and H-bond analysis for sHA **15**, **19**, **25** and **26** in complex with Sclerostin (model16).

| sHA derivative       | Sclerostin recognition site                                                            | $\Delta G$ (kcal/mol) <sup>a</sup> |
|----------------------|----------------------------------------------------------------------------------------|------------------------------------|
| <b>25</b> (cluster1) | K74, R114, R116, A117, Q118, R119, Q121, R133, K134, R136, R145, R148                  | -79.6 ± 9.1                        |
| <b>25</b> (cluster2) | R89, R97, K99, R102, S104, R114, R136, K142, K144, R145, R148                          | -94.5 ± 6.2                        |
| <b>15</b> (cluster1) | K74, R114, R116, Q118, R119, Q121, K134, R136                                          | -89.1 ± 7.7                        |
| <b>15</b> (cluster2) | K74, R114, R116, Q118, R119, R133, K134, R136                                          | -80.5 ± 12.8                       |
| <b>15</b> (cluster3) | R97, K99, R102, R114, R116, R119, R136, K142, K144, R145, R148                         | -120.2 ± 7.4                       |
| <b>26</b> (cluster1) | K74, R114, R116, Q118, R119, R133, K134, R136, K142, R145                              | -105.4 ± 15.2                      |
| <b>26</b> (cluster2) | R97, K99, W100, R102, R114, Y115, R116, R119, R133, K134, R136, K142, K144, R145, R148 | -135.3 ± 14.3                      |
| <b>19</b> (cluster1) | K74, R97, R114, R116, Q118, R119, K134, R136                                           | -95.5 ± 12.0                       |
| <b>19</b> (cluster2) | R97, K99, W101, R102, R114, R116, K142, K144, R145, R148                               | -128.6 ± 16.6                      |

<sup>a</sup>Values represent the mean ± SD from independent 100 ns MD simulations (up to 5 per cluster depending on number of binding poses obtained in the docking studies).

**STable 9.** TAMRA/Sclerostin pairwise interacting residues determined by MM-GBSA.

| sHA derivatives      | Sclerostin (model 1)                                     | Sclerostin (model 10)                   | Sclerostin (model 16)  |
|----------------------|----------------------------------------------------------|-----------------------------------------|------------------------|
| <b>15</b> (cluster1) | R109, R114, R136, R148                                   | R119, R133, K134                        | R116, Q118, R119, Q121 |
| <b>15</b> (cluster2) | Y54, G86, P87, A88, L90, L91, I95, R97, R102, R145, R148 | R63, F108, I111, P112, R133, R136, L146 | R114, R116, R148       |
| <b>15</b> (cluster3) | Y54, P87                                                 | R97, K99, R136, R148                    | R114, R116, R119, K142 |
| <b>19</b> (cluster1) | Y54, R57, L91, R114, R116                                | P87, R89, L90, L91, K99                 | K74                    |
| <b>19</b> (cluster2) | Y54, R57, R114                                           | S52, R57, R148                          | R114, R116             |
| <b>19</b> (cluster3) | R89, R102, R145, T147, R148                              | R63                                     |                        |

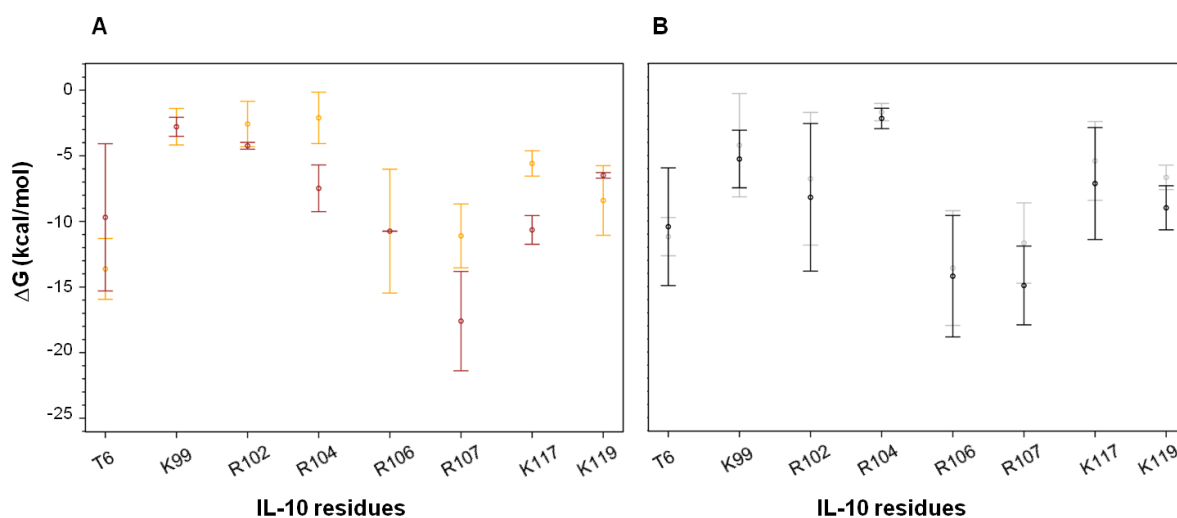

**Figure 12.** Per-residue binding energy contribution calculated with MM-GBSA from independent 100 ns MD simulations of IL-10 in complex with high sulfated tetra- and hexahyaluronans (A) azide derivatives **25** (orange) and **26** (brown), (B) TAMRA derivatives **15** (gray) and **19** (black). The errors bars represent the standard error of the mean.

**Table 10.** MM-GBSA binding free energies and interacting residues determined by per-residue energy decomposition and H-bond analysis for sHA **15**, **19**, **25** and **26** in complex with IL-10.

| sHA derivative <sup>a</sup> | IL-10 recognition site <sup>b</sup>                                                           | $\Delta G$ (kcal/mol) <sup>c</sup> |
|-----------------------------|-----------------------------------------------------------------------------------------------|------------------------------------|
| <b>25</b> (cluster1)        | T6, Q7, S8, N10, K99, R102, R104, R106, R107, N116, K117, K119                                | $-70.2 \pm 14.9$                   |
| <b>15</b> (cluster1)        | T6, Q7, S8, N10, Q70, K99, R102, L103, R104, R106, R107, N116, K117, K119, K125, Q100', R106' | $-80.3 \pm 10.4$                   |
| <b>26</b> (cluster1)        | T6, Q7, Q70, K99, R102, R104, R106, R107, R110, K117, K119                                    | $-76.1 \pm 3.2$                    |
| <b>19</b> (cluster1)        | T6, Q7, S8, Q70, K99, R102, L103, R104, R106, R107, R110, N116, K117, K119, K125, K130, K119' | $-86.2 \pm 6.1$                    |

<sup>a</sup>A main cluster was predicted. <sup>b</sup>Monomer units are distinguished by a comma. <sup>c</sup>Values represent the mean  $\pm$  SD from independent 100 ns MD simulations (up to 7 per cluster depending on number of binding poses obtained in the docking studies).

**Table 11.** TAMRA/IL-10 pairwise interacting residues determined by MM-GBSA.

| sHA derivative <sup>a</sup>       | IL-10        |
|-----------------------------------|--------------|
| <b>15</b> (cluster1) <sup>a</sup> | Q100', R106' |
| <b>19</b> (cluster1) <sup>a</sup> | Q70, K119'   |

<sup>a</sup>A main cluster was predicted.

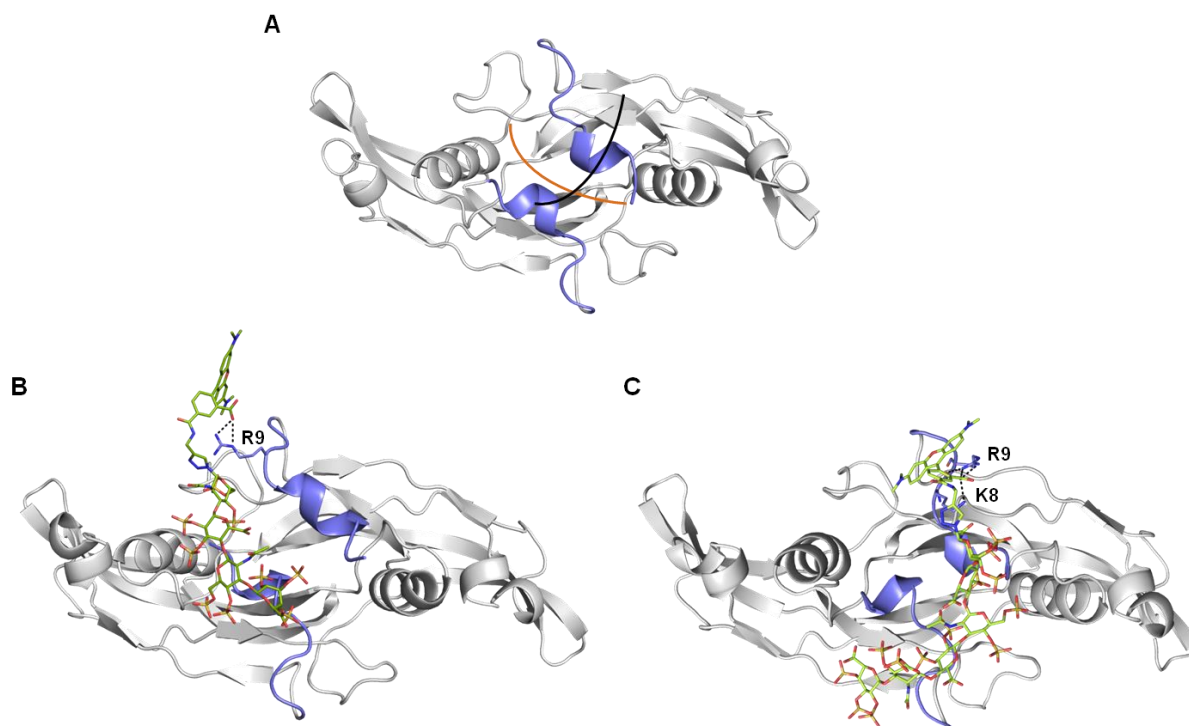

**Figure 13.** Molecular modeling of BMP-2 interaction with SHA derivatives. (A) Schematic visualization of the two different binding modes predicted, parallel (orange) and perpendicular (black). Representative snapshots from 100 ns MD simulations for the most favorable binding modes of **15** (B) and **19** (C) parallel or perpendicularly oriented towards the N-termini of BMP-2, respectively, and the TAMRA moiety establishing contacts with R9 of BMP-2 are shown. BMP-2 is depicted in gray cartoon and N-termini residues relevant for recognition are highlighted in purple. SHA derivatives are shown in stick and colored by atom type.



**STable 12.** MM-GBSA binding free energies and interacting residues determined by per-residue energy decomposition and H-bond analysis for sHA **15**, **19**, **21-23** and **25-26** in complex with BMP-2.

| sHA derivative                      | BMP-2 recognition site <sup>a</sup>                                                            | $\Delta G$ (kcal/mol) <sup>b</sup> |
|-------------------------------------|------------------------------------------------------------------------------------------------|------------------------------------|
| <b>21</b> (cluster1) <sup>c</sup>   | Q1, K5, Q6, R7, K8, R9, K5', Q6', R7', K8', R9'                                                | -38.9 ± 1.7                        |
| <b>21</b> (cluster2) <sup>d</sup>   | Q1, K5, Q6, R7, K8, R9, L10, Q1', H4', K5', R7'                                                | -38.4 ± 8.2                        |
| <b>22</b> (cluster1) <sup>c</sup>   | Q1, K5, Q6, R7, K8, R9, K76, Q1', K3', K5', R7', K8', K76'                                     | -68.3 ± 9.3                        |
| <b>22</b> (cluster2) <sup>d</sup>   | Q1, K3, K5, Q6, R7, K8, R9, Q1', K5', K73'                                                     | -64.8 ± 4.5                        |
| <b>23</b> (cluster) <sup>c</sup>    | Q1, K5, Q6, R7, K8, R9, K76, Q1', K3', K5', K8', K76'                                          | -94.4 ± 11.3                       |
| <b>25</b> (cluster) <sup>c</sup>    | Q1, K5, Q6, R7, K8, R9, Q1', K3', K5', Q6', R7', K8', R9'                                      | -104.2 ± 14.3                      |
| <b>15</b> (cluster1) <sup>c</sup>   | Q1, K3, K5, Q6, R7, K8, R9, K11, R76, Q1', K3', K5', Q6', R7', K8', R9'                        | -120.2 ± 20.2                      |
| <b>15</b> (cluster2) <sup>c,e</sup> | Q1, K5, Q6, R7, K8, R9, R76, Q1', K3', K5', Q6', R7', K8', R9'                                 | -100.1 ± 4.1                       |
| <b>15</b> (cluster3) <sup>d</sup>   | Q1, K3, K5, Q6, R7, K8, R9, K11, R76, Q1', K5', K8', R9', K73'                                 | -106.9 ± 11.7                      |
| <b>26</b> (cluster2) <sup>c</sup>   | Q1, K3, K5, Q6, R7, K8, R9, K11, R76, Q1', K5', Q6', R7', K8', R9', K11', R76'                 | -109.2 ± 14.3                      |
| <b>26</b> (cluster1) <sup>d</sup>   | Q1, K3, K5, Q6, R7, K8, R9, K11, K73, K76, Q1', A2', K3', H4', K5', R7', R73'                  | -119.5 ± 11.1                      |
| <b>19</b> (cluster1) <sup>d</sup>   | Q1, K3, K5, Q6, R7, K8, R9, K11, K73, K76, Q1', K3', K5', Q6', R7', K8', R9', K11', K73', K76' | -123.0 ± 9.9                       |
| <b>19</b> (cluster2) <sup>d</sup>   | Q1, K3, K5, Q6, R7, K8, R9, K11, K76, Q1', K3', K5', R9', K73', K76'                           | -108.1 ± 16.7                      |
| <b>19</b> (cluster3) <sup>d,e</sup> | Q1, K3, K5, Q6, R7, K8, R9, K11, K76, Q1', K3', K5', Q6', R7', K8', R9', K11', K73', K76'      | -124.6 ± 6.6                       |

<sup>a</sup>Monomer units are distinguished by a comma. <sup>b</sup>Values represent the mean ± SD from independent 100 ns MD simulations (up to 6 per cluster depending on number of binding poses obtained in the docking studies). <sup>c</sup>Parallel oriented towards the BMP-2 N-termini. <sup>d</sup>Perpendicular oriented towards the BMP-2 N-termini. <sup>e</sup>TAMRA moiety does not interact with the protein.

**STable 13.** TAMRA/BMP-2 pairwise interacting residues determined by MM-GBSA

| sHA derivatives      | BMP-2 <sup>a</sup> |
|----------------------|--------------------|
| <b>15</b> (cluster1) | R9                 |
| <b>15</b> (cluster3) | Q1, K3, R9         |
| <b>19</b> (cluster1) | K8, R9             |
| <b>19</b> (cluster2) | R9'                |

<sup>a</sup>Monomer units are distinguished by a comma.

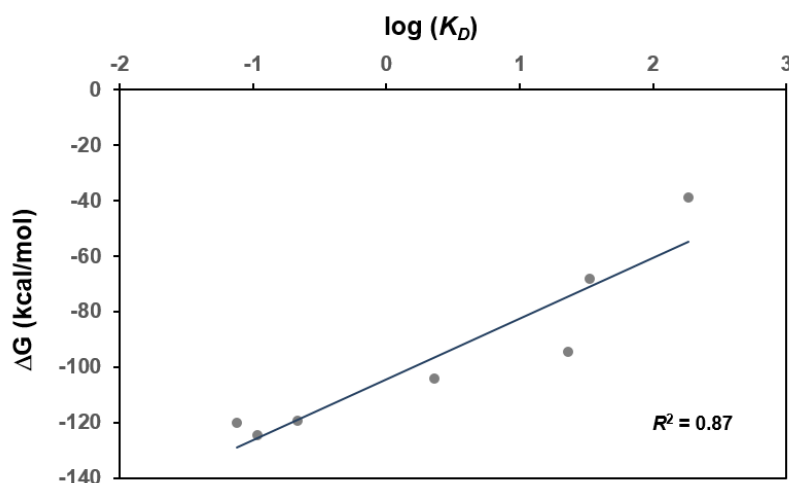

**Figure 14.** Correlation between predicted binding energies ( $\Delta G$ ) calculated with MM-GBSA and experimental  $K_D$  binding data for BMP-2. Plot of  $\log(K_D)$  vs.  $\Delta G$  using the most favorable calculated binding free energies (STable 12) from independent 100 ns MD simulations of BMP-2 in complex with the sulfated hyaluronan derivatives **15**, **19**, **21-23** and **25-26**. Regression analysis was performed by linear regression. The obtained coefficient of determination  $R^2$  is shown in the plot.

## 9. References

- Pichert, A.; Samsonov, S. A.; Theisgen, S.; Thomas, L.; Baumann, L.; Schiller, J.; Beck-Sickinger, A. G.; Huster, D.; Pisabarro, M. T. *Glycobiology* **2012**, *22*, 134-45.
- Künze, G.; Theisgen, S.; Huster, D. *Biomol. NMR Assign.* **2014**, *8*, 375-8.
- Panitz, N.; Theisgen, S.; Samsonov, S. A.; Gehrcke, J. P.; Baumann, L.; Bellmann-Sickert, K.; Köhling, S.; Pisabarro, M. T.; Rademann, J.; Huster, D.; Beck-Sickinger, A. G. *Glycobiology* **2016**, *26*, 1209-1221.
- Xiao, Q.; Ju, Y.; Yang, X.; Zhao, Y. F. *Rapid Commun. Mass Spectrom.* **2003**, *17*, 1405-10.
- Köhling, S.; Exner, M. P.; Nojoumi, S.; Schiller, J.; Budisa, N.; Rademann, J. *Angew. Chem. Int. Ed. Engl.* **2016**, *55*, 15510-15514.
- Köhling, S.; Künze, G.; Lemmnitzer, K.; Bermudez, M.; Wolber, G.; Schiller, J.; Huster, D.; Rademann, J. *Chem. Eur. J.* **2016**, *22*, 5563-74.
- Pope, A. J.; Haupts, U. M.; Moore, K. J. *Drug Discov. Today* **1999**, *4*, 350-362.
- <https://botdb-abcc.ncifcrf.gov/BotDB/toxin/kiCalPL.jsp>.
- Nikolovska-Coleska, Z.; Wang, R.; Fang, X.; Pan, H.; Tomita, Y.; Li, P.; Roller, P. P.; Krajewski, K.; Saito, N. G.; Stuckey, J. A.; Wang, S. *Anal. Biochem.* **2004**, *332*, 261-73.
- Case, D. A.; Berryman, J. T.; Betz, R. M.; Cerutti, D. S.; T.E. Cheatham, I.; Darden, T. A.; Duke, R. E.; Giese, T. J.; Gohlke, H.; Goetz, A. W.; Homeyer, N.; Izadi, S.; Janowski, P.; Kaus, J.; Kovalenko, A.; Lee, T. S.; LeGrand, S.; Li, P.; Luchko, T.; Luo, R.; Madej, B.; Merz, K. M.; Monard, G.; Needham, P.; Nguyen, H.; Nguyen, H. T.; Omelyan, I.; Onufriev, A.; Roe, D. R.; Roitberg, A.; Salomon-Ferrer, R.; Simmerling, C. L.; Smith, W.; Swails, J.; Walker, R. C.; Wang, J.; Wolf, R. M.; Wu, X.; York, D. M.; Kollman, P. A. *AMBER 2014*, University of California, San Francisco., 2014.
- Molecular Operating Environment (MOE), version 2015; Chemical Computing Group Inc.: Montreal, QC, Canada 2015.*
- Kirschner, K. N.; Yongye, A. B.; Tschampel, S. M.; Gonzalez-Outeirino, J.; Daniels, C. R.; Foley, B. L.; Woods, R. J. *J. Comput. Chem.* **2008**, *29*, 622-55.

- 13 Huige, C. J. M.; Altona, C. J. *Comput. Chem.* **1995**, *16*, 56-79.
- 14 Walker, R. C.; Crowley, M. F.; Case, D. A. *J. Comput. Chem.* **2008**, *29*, 1019-31.
- 15 (a) Bayly, C. I.; Cieplak, P.; Cornell, W. D.; Kollman, P. A. *J. Phys. Chem.-Us* **1993**, *97*, 10269-10280; (b) Dupradeau, F. Y.; Pigache, A.; Zaffran, T.; Savineau, C.; Lelong, R.; Grivel, N.; Lelong, D.; Rosanski, W.; Cieplak, P. *Phys. Chem. Chem. Phys.* **2010**, *12*, 7821-7839.
- 16 Frisch, M. J.; Trucks, G. W.; Schlegel, H. B.; Scuseria, G. E.; Robb, M. A.; Cheeseman, J. R.; Scalmani, G.; Barone, V.; Mennucci, B.; Petersson, G. A.; Nakatsuji, H.; Caricato, M.; Li, X.; Hratchian, H. P.; Izmaylov, A. F.; Bloino, J.; Zheng, G.; Sonnenberg, J. L.; Hada, M.; Ehara, M.; Toyota, K.; Fukuda, R.; Hasegawa, J.; Ishida, M.; Nakajima, T.; Honda, Y.; Kitao, O.; Nakai, H.; Vreven, T.; Montgomery Jr., J. A.; Peralta, J. E.; Ogliaro, F.; Bearpark, M. J.; Heyd, J.; Brothers, E. N.; Kudin, K. N.; Staroverov, V. N.; Kobayashi, R.; Normand, J.; Raghavachari, K.; Rendell, A. P.; Burant, J. C.; Iyengar, S. S.; Tomasi, J.; Cossi, M.; Rega, N.; Millam, N. J.; Klene, M.; Knox, J. E.; Cross, J. B.; Bakken, V.; Adamo, C.; Jaramillo, J.; Gomperts, R.; Stratmann, R. E.; Yazyev, O.; Austin, A. J.; Cammi, R.; Pomelli, C.; Ochterski, J. W.; Martin, R. L.; Morokuma, K.; Zakrzewski, V. G.; Voth, G. A.; Salvador, P.; Dannenberg, J. J.; Dapprich, S.; Daniels, A. D.; Farkas, Ö.; Foresman, J. B.; Ortiz, J. V.; Cioslowski, J.; Fox, D. J. *Gaussian 09, Revision C.01*, Gaussian, Inc.: Wallingford, CT, USA, 2009.
- 17 Baldwin, E. T.; Weber, I. T.; St Charles, R.; Xuan, J. C.; Appella, E.; Yamada, M.; Matsushima, K.; Edwards, B. F.; Clore, G. M.; Gronenborn, A. M.; et al. *Proc. Natl. Acad. Sci. U.S.A.* **1991**, *88*, 502-6.
- 18 Clore, G. M.; Appella, E.; Yamada, M.; Matsushima, K.; Gronenborn, A. M. *Biochemistry* **1990**, *29*, 1689-96.
- 19 Zdanov, A.; SchalkHihi, C.; Wlodawer, A. *Protein Sci.* **1996**, *5*, 1955-1962.
- 20 Allendorph, G. P.; Vale, W. W.; Choe, S. *Proc. Natl. Acad. Sci. U.S.A.* **2006**, *103*, 7643-8.
- 21 Hintze, V.; Samsonov, S. A.; Anselmi, M.; Moeller, S.; Becher, J.; Schnabelrauch, M.; Scharnweber, D.; Pisabarro, M. T. *Biomacromolecules* **2014**, *15*, 3083-92.
- 22 Veverka, V.; Henry, A. J.; Slocombe, P. M.; Ventom, A.; Mulloy, B.; Muskett, F. W.; Muzylak, M.; Greenslade, K.; Moore, A.; Zhang, L.; Gong, J. H.; Qian, X. M.; Paszty, C.; Taylor, R. J.; Robinson, M. K.; Carr, M. D. *J. Biol. Chem.* **2009**, *284*, 10890-10900.
- 23 Morris, G. M.; Goodsell, D. S.; Halliday, R. S.; Huey, R.; Hart, W. E.; Belew, R. K.; Olson, A. J. *J. Comput. Chem.* **1998**, *19*, 1639-1662.
- 24 Ester, M.; Kriegel, H.-P.; Sanders, J.; Xu, X. *Proc. 2nd Int. Knowl. Discov. Data Min. (KKD96)* **1996**, 226-231.
- 25 Wang, J.; Wolf, R. M.; Caldwell, J. W.; Kollman, P. A.; Case, D. A. *J. Comput. Chem.* **2004**, *25*, 1157-74.
- 26 Gouin, S. G.; Vanquelef, E.; Fernandez, J. M.; Mellet, C. O.; Dupradeau, F. Y.; Kovensky, J. *J. Org. Chem.* **2007**, *72*, 9032-45.
- 27 Humphrey, W.; Dalke, A.; Schulten, K. *J. Mol. Graph. Model.* **1996**, *14*, 33-38.
- 28 (a) Wang, J. M.; Morin, P.; Wang, W.; Kollman, P. A. *J. Am. Chem. Soc.* **2001**, *123*, 5221-5230; (b) Miller, B. R., 3rd; McGee, T. D., Jr.; Swails, J. M.; Homeyer, N.; Gohlke, H.; Roitberg, A. E. *J. Chem. Theory Comput.* **2012**, *8*, 3314-21.
- 29 R-package Development Core Team. <http://www.r-project.org>. **2015**.
- 30 *The PyMOL Molecular Graphics System*, Version 1.8 Schrödinger; LLC: 2009-2015.
- 31 (a) Gehrcke, J. P.; Pisabarro, M. T. *J. Mol. Graph. Model.* **2015**, *62*, 97-104; (b) Künze, G.; Köhling, S.; Vogel, A.; Rademann, J.; Huster, D. *J. Biol. Chem.* **2016**, *291*, 3100-13.
- 32 Ohkawara, B.; Iemura, S.; ten Dijke, P.; Ueno, N. *Curr. Biol.* **2002**, *12*, 205-209.
